# Supplementary material for: Electrochemical ring-opening carboxylation of cyclic carbonate with carbon dioxide
Source: Royal Society of Chemistry journal article supplement (doi:10.1039/d4cc01695e), 2024-01-01
Supplement: d4cc01695e1.pdf [file d4cc01695e1.pdf]

## Supporting Information

# Electrochemical ring-opening carboxylation of cyclic carbonate with carbon dioxide

Li Tao, He Wang, Xiao-Fei Liu, Wei-Min Ren, Xiao-Bing Lu and Wen-Zhen Zhang\*

State Key Laboratory of Fine Chemicals, Frontiers Science Center for Smart Materials. Dalian University of Technology, Dalian, 116024, China

E-mail: zhangwz@dlut.edu.cn.

## Contents

|                                                                          |            |
|--------------------------------------------------------------------------|------------|
| <b>1. General information</b> .....                                      | <b>3</b>   |
| <b>2. General procedure for the preparation of substrates</b> .....      | <b>4</b>   |
| <b>3. General procedure for the electrocarboxylation reactions</b> ..... | <b>10</b>  |
| <b>4. Optimization of electrocarboxylation of cyclic carbonate</b> ..... | <b>11</b>  |
| <b>5. General procedure for the gram-scale reaction</b> .....            | <b>12</b>  |
| <b>6. Characterization of products</b> .....                             | <b>13</b>  |
| <b>7. X-ray crystallographic data</b> .....                              | <b>26</b>  |
| <b>8. Synthetic applications</b> .....                                   | <b>30</b>  |
| <b>9. Mechanistic studies</b> .....                                      | <b>33</b>  |
| <b>10. NMR spectra of substrates and all products</b> .....              | <b>60</b>  |
| <b>11. References</b> .....                                              | <b>136</b> |

## 1. General information

Unless otherwise stated, all manipulations were performed using standard Schlenk techniques under a dry argon or carbon dioxide atmosphere. DMF and DCM were distilled with CaH<sub>2</sub>. THF and toluene were distilled from sodium/benzophenone. All the solvents were stored over 4A molecular sieves before used. NMR spectra were recorded on 400 M, 600 M (<sup>1</sup>H NMR, 400 MHz, 600 MHz; <sup>13</sup>C NMR, 101 MHz, 151 MHz; <sup>19</sup>F NMR, 376 MHz) spectrometer in CDCl<sub>3</sub>, DMSO-*d*<sub>6</sub> or CD<sub>3</sub>OD at ambient temperature and chemical shifts are expressed in parts per million ( $\delta$ , ppm). Proton chemical shifts are referenced to 7.26 ppm (CDCl<sub>3</sub>), 2.50 ppm (DMSO-*d*<sub>6</sub>) or 3.30 ppm (CD<sub>3</sub>OD) and carbon chemical shifts are referenced to 77.0 ppm (CDCl<sub>3</sub>) or 39.5 ppm (DMSO-*d*<sub>6</sub>) or 49.0 ppm (CD<sub>3</sub>OD). High resolution mass spectra (HRMS) were recorded on a Q-TOF mass spectrometry equipped with Z-spray ionization source. Infrared spectra (IR) were measured using a Nicolet NEXUS FT-IR spectrophotometer. Carbon dioxide (99.999%), and other commercially available reagents were purchased from TCI, Sigma-Aldrich, Alfa Aesar, Acros, Adamas, Energy Chemical, or Innochem and used directly without further purification.

## 2. General procedure for the preparation of substrates

### 2.1 General method A for preparation of diol intermediate<sup>[1]</sup>

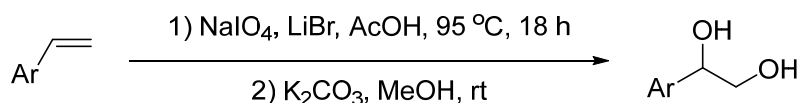

A mixture of olefin (7.5 mmol), NaIO<sub>4</sub> (30 mol %), and LiBr (20 mol %) was taken in a 100 mL round bottomed flask, and glacial acetic acid (10 mL) was added. The reaction mixture was heated at 95 °C (using an oil bath) for 18 h. The light-yellow colored reaction mixture turned purple after completion of the reaction. The reaction mixture was cooled and then extracted with EtOAc (30 mL × 3), and the combined organic phase was washed with saturated sodium thiosulfate solution, water, and aqueous NaHCO<sub>3</sub>. The organic layer was dried over anhydrous Na<sub>2</sub>SO<sub>4</sub> and concentrated under reduced pressure to give crude product, which was subjected to basic hydrolysis without purification. The hydrolysis was carried out by stirring the reaction mixture with K<sub>2</sub>CO<sub>3</sub> (1.5 equiv.) in methanol (20 mL) at 25 °C for 24 h. After completion of the reaction, methanol was removed under reduced pressure, and the reaction mixture was extracted with EtOAc (30 mL × 3). The combined organic phase was washed with water and brine. The organic layer was then dried over anhydrous Na<sub>2</sub>SO<sub>4</sub> and concentrated under reduced pressure to give crude diol, which was purified by column chromatography packed with silica gel (petroleum ether/ethyl acetate 7/3) to afford pure diol.

### 2.2 General method B for preparation of diol intermediate<sup>[2]</sup>

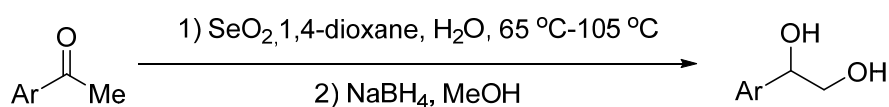

A 250 mL round bottom flask equipped with a magnetic stirring bar was charged with SeO<sub>2</sub> (2.8 g, 25 mmol), 1,4-dioxane (27 mL) and water (3 mL), and stirred at 65 °C until all SeO<sub>2</sub> was dissolved. Then the selected ketone (10 mmol) was added. The reaction mixture was then heated and stirred at 105 °C overnight. After reaction was completed, all the solvent was removed under vacuum, MeOH (30 mL) was then added to the reaction residue. Subsequently, NaBH<sub>4</sub> (0.9 g, 25 mmol) was added to the mixture slowly at 0 °C. The reaction mixture was stirred at room temperature for additional 3 h. The solvent was then removed under vacuo and exacted with EtOAc. The organic phase was collected and dried over Na<sub>2</sub>SO<sub>4</sub>. Then, the filtrate concentrated under reduced pressure to give the residue which was purified via chromatography over silica gel (petroleum ether/ethyl acetate 2/1) to yield the desired glycols.

### 2.3 General method for preparation of cyclic carbonate substrates <sup>[4]</sup>

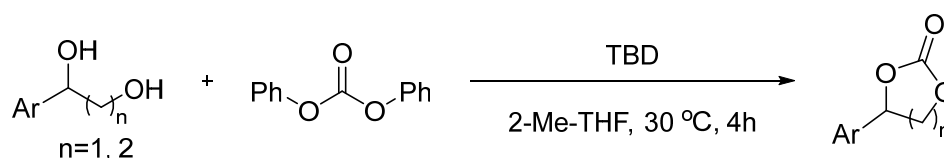

To a solution of diphenyl carbonate (1.0 equiv.) and a vicinal diol (1.1 equiv.) in 2-Me-THF (5 mL) was added TBD (2.0 mol %). The resultant mixture was stirred in an oil bath at the indicated temperature. After completion of the reaction as determined by TLC, drop of acetic acid was added to the reaction mixture. The obtained mixture was directly purified by flash column chromatography on silica gel to afford the desired cyclic carbonate (PE: ethyl acetate was gradually changed from 9:1 to 4:1). When TLC showed that a cyclic carbonate is essentially copular with phenol, the following procedure was applied just prior to flash column chromatography to remove phenol. Upon completion of the reaction, the reaction mixture was diluted with ethyl acetate. The mixture was washed successively with 35% NaOH solution (10 mL  $\times$  2), water (10 mL  $\times$  2), and brine (10 mL), dried over anhydrous  $\text{MgSO}_4$ , filtered, and concentrated using a rotary evaporator to afford the crude mixture.

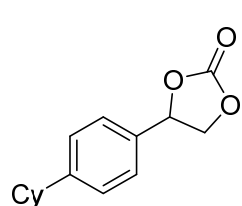

**4-(4-Cyclohexylphenyl)-1,3-dioxolan-2-one (1d).** White solid, 163 mg, 44% yield, m.p.: 104 – 106 °C. <sup>1</sup>H NMR (400 MHz, Chloroform-*d*)  $\delta$  7.30 (s, 4H), 5.66 (t,  $J$  = 8.0 Hz, 1H), 4.79 (t,  $J$  = 8.4 Hz, 1H), 4.37 (t,  $J$  = 8.3 Hz, 1H), 2.55 (tt,  $J$  = 10.7, 3.0 Hz, 1H), 1.91 – 1.84 (m, 4H), 1.78 (d,  $J$  = 12.2 Hz, 1H), 1.43 (td,  $J$  = 9.6, 3.7 Hz, 4H), 1.33 – 1.23 (m, 1H).

<sup>13</sup>C NMR (101 MHz, Chloroform-*d*)  $\delta$  155.0, 150.1, 133.1, 127.8, 126.2, 78.2, 71.2, 44.4, 34.4, 26.9, 26.1. HRMS (ESI-TOF)  $m/z$ :  $[\text{M}+\text{Na}]^+$  Calcd for  $\text{C}_{15}\text{H}_{18}\text{NaO}_3$  269.1153; Found 269.1152. IR (neat  $\text{cm}^{-1}$ )  $\nu$  2954, 1732, 2923, 1732, 1462, 805.

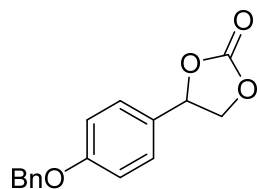

**4-(4-(Benzyloxy) phenyl)-1,3-dioxolan-2-one (1f).** White solid, 276 mg, 68% yield, m.p.: 124 – 126 °C. <sup>1</sup>H NMR (400 MHz, Chloroform-*d*)  $\delta$  7.44 – 7.29 (m, 7H), 7.03 (d,  $J$  = 8.4 Hz, 2H), 5.62 (t,  $J$  = 8.1 Hz, 1H), 5.09 (s, 2H), 4.75 (t,  $J$  = 8.4 Hz, 1H), 4.35 (t,  $J$  = 8.4 Hz, 1H). <sup>13</sup>C

NMR (151 MHz, Chloroform-*d*)  $\delta$  159.8, 154.8, 136.3, 128.6, 128.1, 127.7, 127.6, 127.4, 115.5, 78.0, 71.0, 70.1. HRMS (ESI,  $m/z$ ):  $[\text{M}+\text{Na}]^+$  calcd for  $\text{C}_{16}\text{H}_{14}\text{NaO}_4$  293.0789; Found 293.0784. IR (neat  $\text{cm}^{-1}$ )  $\nu$  2958, 2922, 1735, 1511, 832.

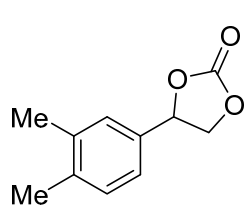

**4-(3,4-Dimethylphenyl)-1,3-dioxolan-2-one (1h).** White solid, 230 mg, 68% yield, m.p.: 52 – 54 °C.  $^1\text{H NMR}$  (400 MHz, Chloroform-*d*)  $\delta$  7.19 (d,  $J = 7.7$  Hz, 1H), 7.13 (s, 1H), 7.09 (d,  $J = 7.7$  Hz, 1H), 5.61 (t,  $J = 8.0$  Hz, 1H), 4.76 (t,  $J = 8.4$  Hz, 1H), 4.34 (t,  $J = 8.2$  Hz, 1H), 2.29 (d,  $J = 2.3$  Hz, 6H).  $^{13}\text{C NMR}$  (151 MHz, Chloroform-*d*)  $\delta$  154.9, 138.5, 137.7, 133.0, 130.3, 127.1, 123.4, 78.1, 71.1, 19.7, 19.5. **HRMS** (ESI-TOF)  $m/z$ :  $[\text{M}+\text{Na}]^+$  Calcd for  $\text{C}_{11}\text{H}_{12}\text{NaO}_3$  215.0684; Found 215.0682. **IR** (neat  $\text{cm}^{-1}$ )  $\nu$  2958, 2923, 1802, 1379, 822.

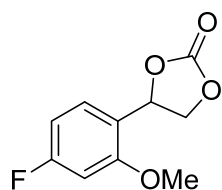

**4-(4-Fluoro-2-methoxyphenyl)-1,3-dioxolan-2-one (1i).** Colorless oil, 247 mg, 58% yield.  $^1\text{H NMR}$  (400 MHz, Chloroform-*d*)  $\delta$  7.32 (ddd,  $J = 8.5, 6.4, 0.8$  Hz, 1H), 6.82 – 6.59 (m, 2H), 5.82 – 5.74 (t,  $J = 8$  Hz, 1H), 4.81 (t,  $J = 8.5$  Hz, 1H), 4.26 (dd,  $J = 8.4, 7.2$  Hz, 1H), 3.85 (s, 3H).  $^{13}\text{C NMR}$  (101 MHz, Chloroform-*d*)  $\delta$  165.4, 162.9, 157.6 (d,  $J = 10.2$  Hz), 154.9, 120.5 (d,  $J = 3.0$  Hz), 107.2 (d,  $J = 21.5$  Hz), 99.4 (d,  $J = 26.4$  Hz), 74.6, 70.3, 55.8, 30.8.  $^{19}\text{F NMR}$  (376 MHz, Chloroform-*d*)  $\delta$  -109.09. **HRMS** (ESI-TOF)  $m/z$ :  $[\text{M}+\text{Na}]^+$  Calcd for  $\text{C}_{10}\text{H}_9\text{FNaO}_4$  235.0382; Found 235.0379. **IR** (neat  $\text{cm}^{-1}$ )  $\nu$  2960, 1809, 1732, 1283, 830, 770.

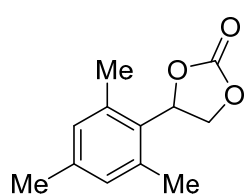

**4-Mesityl-1,3-dioxolan-2-one (1j).** White solid, 258 mg, 85% yield, m.p.: 105 – 107 °C.  $^1\text{H NMR}$  (400 MHz, Chloroform-*d*)  $\delta$  6.89 (s, 2H), 6.12 (t,  $J = 9.3$  Hz, 1H), 4.72 (t,  $J = 8.9$  Hz, 1H), 4.36 (dd,  $J = 9.5, 8.6$  Hz, 1H), 2.36 (s, 6H), 2.28 (s, 3H).  $^{13}\text{C NMR}$  (151 MHz, Chloroform-*d*)  $\delta$  155.1, 139.3, 136.7, 130.7, 127.4, 75.3, 68.8, 20.8, 20.1. **HRMS** (ESI-TOF)  $m/z$ :  $[\text{M}+\text{Na}]^+$  Calcd for  $\text{C}_{12}\text{H}_{14}\text{NaO}_3$  229.0840; Found 229.0836. **IR** (neat  $\text{cm}^{-1}$ )  $\nu$  2955, 2923, 1788, 1611, 1378, 853, 770.

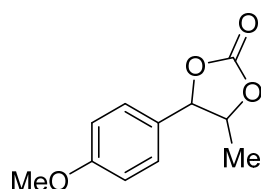

**4-(4-Methoxyphenyl)-5-methyl-1,3-dioxolan-2-one (1m).** *Trans*, colorless oil, 124 mg, 59% yield.  $^1\text{H NMR}$  (400 MHz, Chloroform-*d*)  $\delta$  7.39 – 7.15 (m, 2H), 7.04 – 6.74 (m, 2H), 5.07 (d,  $J = 8.1$  Hz, 1H), 4.60 (t,  $J = 6.5$  Hz, 1H), 3.82 (d,  $J = 1.7$  Hz, 3H), 1.52 (dd,  $J = 6.3, 1.8$  Hz, 3H).  $^{13}\text{C NMR}$  (151 MHz, Chloroform-*d*)  $\delta$  160.6, 154.3, 127.8, 126.6, 114.5, 84.9, 80.6, 55.3, 18.0. **HRMS** (ESI-TOF)  $m/z$ :  $[\text{M}+\text{Na}]^+$  Calcd for  $\text{C}_{11}\text{H}_{12}\text{NaO}_4$  231.0633; Found 231.0625. **IR** (neat  $\text{cm}^{-1}$ )  $\nu$  2923, 1798, 1613, 1251, 832

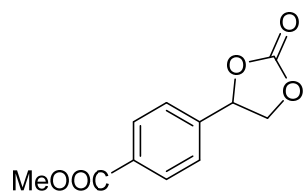

**Methyl 4-(2-oxo-1,3-dioxolan-4-yl) benzoate (1q).** White solid, 357 mg, 62%, m.p.: 106 – 108 °C.  $^1\text{H NMR}$  (400 MHz, Chloroform-*d*)  $\delta$  8.11 (d,  $J = 8.0$  Hz, 2H), 7.44 (d,  $J = 8.0$  Hz, 2H), 5.74 (t,  $J = 8.0$  Hz, 1H), 4.85 (t,  $J = 8.5$  Hz, 1H), 4.32 (t,  $J = 8.2$  Hz, 1H), 3.94 (s, 3H).  $^{13}\text{C NMR}$  (151 MHz, Chloroform-*d*)  $\delta$  166.2, 154.4, 140.5, 131.4, 130.5, 125.5, 77.1, 70.9, 52.4. **HRMS** (ESI-TOF)  $m/z$ :  $[\text{M}+\text{Na}]^+$  Calcd for  $\text{C}_{11}\text{H}_{10}\text{NaO}_5$  245.0425; Found 245.0422. **IR** (neat  $\text{cm}^{-1}$ )  $\nu$  2953, 2923, 1723, 1377, 1163, 812.

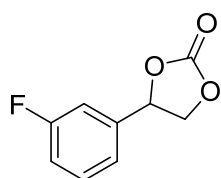

**4-(3-Fluorophenyl)-1,3-dioxolan-2-one (1r).** White solid, 284 mg, 78% yield, m.p.: 68 – 70 °C.  $^1\text{H NMR}$  (400 MHz, Chloroform-*d*)  $\delta$  7.43 (td,  $J = 8.0, 5.7$  Hz, 1H), 7.17 – 7.06 (m, 3H), 5.67 (t,  $J = 7.9$  Hz, 1H), 4.82 (t,  $J = 8.4$  Hz, 1H), 4.32 (t,  $J = 8.2$  Hz, 1H).  $^{13}\text{C NMR}$  (151 MHz, Chloroform-*d*)  $\delta$  163.0 (d,  $J = 248.4$  Hz), 154.4, 138.3 (d,  $J = 7.1$  Hz), 131.0 (d,  $J = 7.9$  Hz), 122.5 – 119.2 (m), 116.6 (d,  $J = 21.5$  Hz), 112.8 (d,  $J = 22.9$  Hz), 70.9. **HRMS** (ESI,  $m/z$ ):  $[\text{M}+\text{Na}]^+$  calcd for  $\text{C}_9\text{H}_7\text{FNaO}_3$  205.0271; Found 205.0271. **IR** (neat  $\text{cm}^{-1}$ )  $\nu$  2954, 2923, 1738, 1070, 783.

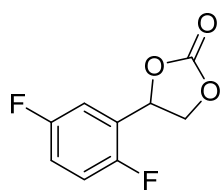

**4-(2,5-Difluorophenyl)-1,3-dioxolan-2-one (1s).** Colorless oil, 298 mg, 75% yield.  $^1\text{H NMR}$  (400 MHz, Chloroform-*d*)  $\delta$  7.21 – 7.17 (m, 1H), 7.14 – 7.09 (m, 2H), 5.87 (t,  $J = 7.9$  Hz, 1H), 4.89 (td,  $J = 8.6, 1.1$  Hz, 1H), 4.34 (ddd,  $J = 8.5, 7.4, 0.9$  Hz, 1H).  $^{13}\text{C NMR}$  (151 MHz, Chloroform-*d*)  $\delta$  158.7 (d,  $J = 245.5$  Hz), 155.5 (dd,  $J = 243.0, 3.0$  Hz), 154.1, 125.2 (dd,  $J = 15.3, 7.6$  Hz), 117.3 (ddd,  $J = 39.2, 23.9, 8.7$  Hz), 113.7 (d,  $J = 4.2$  Hz), 113.5 (d,  $J = 4.2$  Hz), 72.4 (d,  $J = 2.9$  Hz), 70.0 (d,  $J = 3.2$  Hz).  $^{19}\text{F NMR}$  (565 MHz, Chloroform-*d*)  $\delta$  -116.57 (d,  $J = 17.9$  Hz), -124.09 (d,  $J = 17.4$  Hz). **HRMS** (ESI,  $m/z$ ):  $[\text{M}+\text{Na}]^+$  calcd for  $\text{C}_9\text{H}_6\text{F}_2\text{NaO}_3$  223.0182; Found 223.0178. **IR** (neat  $\text{cm}^{-1}$ )  $\nu$  2953, 2922, 1745, 1377, 680.

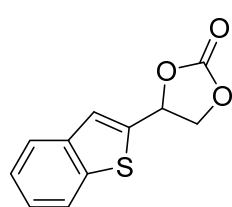

**4-(Benzo[b]thiophen-2-yl)-1,3-dioxolan-2-one (1v).** White solid, 313mg, 71% yield, m.p.: 143 – 145 °C.  $^1\text{H NMR}$  (400 MHz, Chloroform-*d*)  $\delta$  7.87 – 7.84 (m, 2H), 7.43 – 7.40 (m, 3H), 5.99 (ddd,  $J = 8.1, 7.4, 0.8$  Hz, 1H), 4.84 (dd,  $J = 8.8, 8.0$  Hz, 1H), 4.57 (dd,  $J = 8.8, 7.4$  Hz, 1H).  $^{13}\text{C NMR}$  (101 MHz, Chloroform-*d*)  $\delta$  154.0, 139.9, 138.7, 138.1, 125.6, 125.0, 124.3, 122.7, 74.5, 70.5. **HRMS** (ESI-TOF)  $m/z$ :  $[\text{M}+\text{Na}]^+$  Calcd for  $\text{C}_{11}\text{H}_8\text{NaO}_3\text{S}$  243.0091; Found 243.0090. **IR** (neat  $\text{cm}^{-1}$ )  $\nu$  2955, 1784, 1458, 1069, 748.

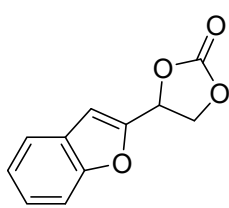

**4-(Benzofuran-2-yl)-1,3-dioxolan-2-one (1w).** White solid, 354 mg, 87% yield, m.p.: 129 – 131 °C.  $^1\text{H NMR}$  (400 MHz, Chloroform-*d*)  $\delta$  7.61 (ddd,  $J = 7.8, 1.4, 0.7$  Hz, 1H), 7.52 (dq,  $J = 8.3, 0.9$  Hz, 1H), 7.38 (ddd,  $J = 8.4, 7.3, 1.4$  Hz, 1H), 7.29 (td,  $J = 7.6, 1.0$  Hz, 1H), 6.94 (s, 1H), 5.81 (t,  $J = 7.7$  Hz, 1H), 4.78 (d,  $J = 1.3$  Hz, 1H), 4.76 (d,  $J = 0.7$  Hz, 1H).  $^{13}\text{C NMR}$  (151 MHz, Chloroform-*d*)  $\delta$  155.4, 154.1, 149.4, 127.0, 125.9, 123.5, 121.8, 111.7, 108.1, 71.3, 67.4. **HRMS** (ESI, *m/z*):  $[\text{M}+\text{Na}]^+$  Calcd for  $\text{C}_{11}\text{H}_8\text{NaO}_4$  227.0320; Found 227.0321. **IR** (neat  $\text{cm}^{-1}$ )  $\nu$  2955, 2923, 2360, 1804, 1732, 752.

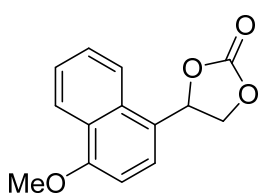

**4-(4-Methoxynaphthalen-1-yl)-1,3-dioxolan-2-one (1x).** White solid, 255 mg, 52%, m.p.: 90 – 92 °C.  $^1\text{H NMR}$  (400 MHz, Chloroform-*d*)  $\delta$  8.39 – 8.36 (m, 1H), 7.64 – 7.55 (m, 4H), 6.84 (d,  $J = 8.1$  Hz, 1H), 6.33 (t,  $J = 7.4$  Hz, 1H), 4.99 (t,  $J = 8.3$  Hz, 1H), 4.42 (dd,  $J = 8.5, 7.5$  Hz, 1H), 4.03 (s, 3H).  $^{13}\text{C NMR}$  (101 MHz, Chloroform-*d*)  $\delta$  156.5, 154.9, 130.4, 127.6, 125.9, 125.6, 123.4, 123.1, 121.3, 102.9, 75.8, 70.6, 55.6, 30.8. **HRMS** (ESI-TOF) *m/z*:  $[\text{M}+\text{Na}]^+$  Calcd for  $\text{C}_{14}\text{H}_{12}\text{NaO}_4$  267.0633; Found 267.0625. **IR** (neat  $\text{cm}^{-1}$ )  $\nu$  2955, 2932, 1804, 1734, 764.

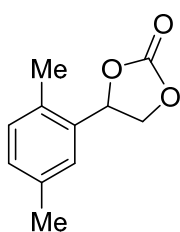

**4-(2,5-Dimethylphenyl)-1,3-dioxolan-2-one (1ab).** Colorless oil, 273 mg, 71% yield.  $^1\text{H NMR}$  (400 MHz, Chloroform-*d*)  $\delta$  7.23 (s, 1H), 7.10 (s, 2H), 5.87 (t,  $J = 8.0$  Hz, 1H), 4.81 (t,  $J = 8.3$  Hz, 1H), 4.26 (t,  $J = 8.1$  Hz, 1H), 2.35 (s, 3H), 2.26 (s, 3H).  $^{13}\text{C NMR}$  (151 MHz, Chloroform-*d*)  $\delta$  154.9, 136.5, 133.8, 131.2, 130.9, 129.8, 125.2, 75.5, 70.4, 21.0, 18.4. **HRMS** (ESI-TOF) *m/z*:  $[\text{M}+\text{Na}]^+$  Calcd for  $\text{C}_{11}\text{H}_{12}\text{NaO}_3$  215.0684; Found 215.0681. **IR** (neat  $\text{cm}^{-1}$ )  $\nu$  2954, 1804, 1731, 1461, 1378, 880.

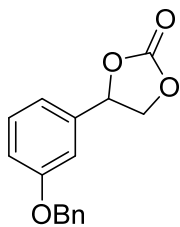

**4-(3-(Benzyloxy) phenyl)-1,3-dioxolan-2-one (1ad).** White solid, 214 mg, 40% yield, m.p.: 76 – 78 °C.  $^1\text{H NMR}$  (400 MHz, Chloroform-*d*)  $\delta$  7.45 – 7.33 (m, 6H), 7.02 – 6.92 (m, 3H), 5.64 (t,  $J = 8.0$  Hz, 1H), 5.08 (s, 2H), 4.78 (t,  $J = 8.4$  Hz, 1H), 4.31 (dd,  $J = 8.6, 7.8$  Hz, 1H).  $^{13}\text{C NMR}$  (101 MHz, Chloroform-*d*)  $\delta$  159.3, 154.7, 137.4, 136.3, 130.4, 128.6, 128.1, 127.4, 118.0, 115.9, 112.2, 77.6, 71.0, 70.1. **HRMS** (ESI-TOF) *m/z*:  $[\text{M}+\text{Na}]^+$  Calcd for  $\text{C}_{16}\text{H}_{14}\text{NaO}_4$  293.0789; Found 293.0781. **IR** (neat  $\text{cm}^{-1}$ )  $\nu$  2954, 1801, 1733, 1601, 1291, 876.



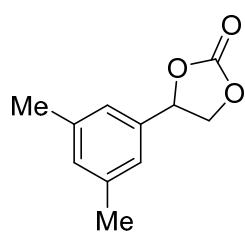

**4-(3,5-Dimethylphenyl)-1,3-dioxolan-2-one (1ae).** White solid, 264 mg, 69% yield, m.p.: 58 – 60 °C.  $^1\text{H NMR}$  (400 MHz, Chloroform-*d*)  $\delta$  7.04 (s, 1H), 6.96 (s, 2H), 5.59 (t,  $J = 8.0$  Hz, 1H), 4.76 (t,  $J = 8.4$  Hz, 1H), 4.33 (dd,  $J = 8.6, 7.8$  Hz, 1H), 2.34 (s, 6H).  $^{13}\text{C NMR}$  (151 MHz, Chloroform-*d*)  $\delta$  155.0, 139.0, 135.7, 131.3, 123.5, 78.1, 71.2, 21.2.

**HRMS** (ESI-TOF)  $m/z$ :  $[\text{M}+\text{Na}]^+$  Calcd for  $\text{C}_{11}\text{H}_{12}\text{NaO}_3$  215.0684; Found 215.0679. **IR** (neat  $\text{cm}^{-1}$ )  $\nu$  2958, 2922, 1745, 1377, 770.

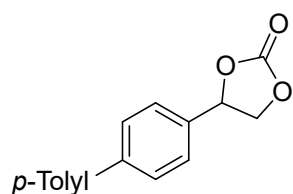

**4-(4'-Methyl-[1,1'-biphenyl]-4-yl)-1,3-dioxolan-2-one (1ag).** White solid, 137 mg, 54% yield, m.p.: 166 – 168 °C.  $^1\text{H NMR}$  (400 MHz, Chloroform-*d*)  $\delta$  7.66 – 7.64 (m, 2H), 7.50 – 7.41 (m, 4H), 7.27 (d,  $J = 8.5$  Hz, 2H), 5.72 (t,  $J = 8.0$  Hz, 1H), 4.82 (t,  $J = 8.4$  Hz, 1H), 4.39 (dd,  $J = 8.6, 7.9$  Hz, 1H), 2.41 (s, 3H).  $^{13}\text{C NMR}$  (101 MHz, Chloroform-*d*)  $\delta$  154.77, 142.72, 137.79, 137.10, 134.22, 129.64, 127.69, 126.94, 126.37, 77.89, 71.10, 21.10.

**HRMS** (ESI-TOF)  $m/z$ :  $[\text{M}+\text{Na}]^+$  Calcd for  $\text{C}_{16}\text{H}_{14}\text{NaO}_3$  277.0840; Found 277.0833. **IR** (neat  $\text{cm}^{-1}$ )  $\nu$  2953, 2922, 2360, 1790, 1167, 808.

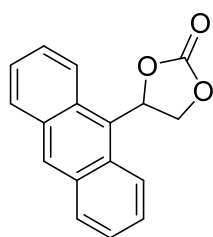

**4-(Anthracen-9-yl)-1,3-dioxolan-2-one (1ai).** Yellow solid, 212 mg, 52% yield, m.p.: 144 – 146 °C.  $^1\text{H NMR}$  (400 MHz, Chloroform-*d*)  $\delta$  8.55 (s, 1H), 8.16 (d,  $J = 9.0$  Hz, 2H), 8.06 (d,  $J = 7.9$  Hz, 2H), 7.61 – 7.50 (m, 4H), 7.20 (t,  $J = 9.6$  Hz, 1H), 4.95 (t,  $J = 8.9$  Hz, 1H), 4.84 (dd,  $J = 10.2, 8.7$  Hz, 1H).  $^{13}\text{C NMR}$  (101 MHz, Chloroform-*d*)  $\delta$  155.1, 131.3, 131.1, 130.2, 129.9, 127.5, 125.1, 122.7, 122.2, 74.9, 69.7. **HRMS** (ESI,  $m/z$ ):  $[\text{M}+\text{Na}]^+$  calcd for  $\text{C}_{17}\text{H}_{12}\text{NaO}_3$  287.0684; Found 287.0683. **IR** (neat  $\text{cm}^{-1}$ )  $\nu$  2925, 1805, 1168, 1377, 730.

### 3. General procedure for the electrocarboxylation reactions

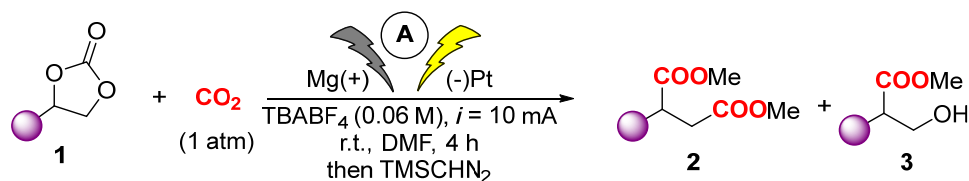

A 50 mL oven-dried electrochemical cell containing a stir bar was evacuated and back-filled under  $\text{CO}_2$  flow for at least 3 times. **1** (0.3 mmol),  $\text{TBABF}_4$  (0.3 mmol) and DMF (5 mL) were added to the cell and the cell was installed with a Pt cathode and Mg anode, and the cell was closed under  $\text{CO}_2$  atmosphere. Then, the reaction mixture was electrolyzed under a constant current of 10 mA for 4 h. The reaction mixture was carefully quenched with HCl (1M, 10 mL) and extracted three times with ethyl acetate ( $3 \times 20$  mL). The combined organic phase was dried by anhydrous  $\text{MgSO}_4$  and evaporated in vacuum. The residue was methylated at  $0^\circ\text{C}$  with  $\text{TMSCHN}_2$  (2 M in hexane, 0.6 mL) in 2 mL of ether/methanol (1:1 v/v) solvent. Finally, the corresponding methylation product was purified by column chromatography (10:1-3:1 v/v petroleum ether/ethyl acetate).

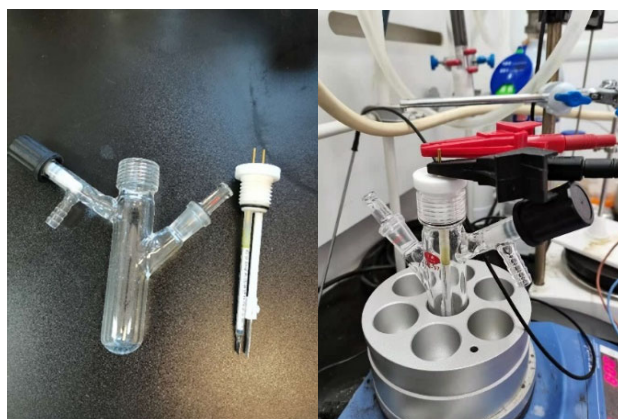

**Figure S1.** Photos for the electrocarboxylation. Pt (10 mm  $\times$  10 mm  $\times$  0.3 mm), Mg (20 mm  $\times$  10 mm  $\times$  0.5 mm). Electrochemical cell: 50 mL.

#### 4. Optimization of electrocarboxylation of cyclic carbonate

Table S1. Optimization of electrocarboxylation of cyclic carbonate. <sup>[a]</sup>

| Entry | Anode | Cathode | Electrolyte                       | T     | Solvent            | Current | t   | Yield <sup>[b]</sup>   |
|-------|-------|---------|-----------------------------------|-------|--------------------|---------|-----|------------------------|
| 1     | Pt    | Mg      | Bu <sub>4</sub> NBF <sub>4</sub>  | rt    | DMF                | 10 mA   | 4 h | 89(78 <sup>[c]</sup> ) |
| 2     | Pt    | Zn      | Bu <sub>4</sub> NBF <sub>4</sub>  | rt    | DMF                | 10 mA   | 4 h | 64                     |
| 3     | Pt    | Ni      | Bu <sub>4</sub> NBF <sub>4</sub>  | rt    | DMF                | 10 mA   | 4 h | 76                     |
| 4     | Ni    | Mg      | Bu <sub>4</sub> NBF <sub>4</sub>  | rt    | DMF                | 10 mA   | 4 h | 37                     |
| 5     | Cu    | Mg      | Bu <sub>4</sub> NBF <sub>4</sub>  | rt    | DMF                | 10 mA   | 4 h | 50                     |
| 6     | C     | Mg      | Bu <sub>4</sub> NBF <sub>4</sub>  | rt    | DMF                | 10 mA   | 4 h | 61                     |
| 7     | Pt    | Mg      | Bu <sub>4</sub> NPF <sub>6</sub>  | rt    | DMF                | 10 mA   | 4 h | 60                     |
| 8     | Pt    | Mg      | Bu <sub>4</sub> NI                | rt    | DMF                | 10 mA   | 4 h | 70                     |
| 9     | Pt    | Mg      | Bu <sub>4</sub> NCIO <sub>4</sub> | rt    | DMF                | 10 mA   | 4 h | 67                     |
| 10    | Pt    | Mg      | Et <sub>4</sub> NI                | rt    | DMF                | 10 mA   | 4 h | 71                     |
| 11    | Pt    | Mg      | Bu <sub>4</sub> NBF <sub>4</sub>  | rt    | DMSO               | 10 mA   | 4 h | 87                     |
| 12    | Pt    | Mg      | Bu <sub>4</sub> NBF <sub>4</sub>  | rt    | THF                | 10 mA   | 4 h | 52                     |
| 13    | Pt    | Mg      | Bu <sub>4</sub> NBF <sub>4</sub>  | rt    | CH <sub>3</sub> CN | 10 mA   | 4 h | 49                     |
| 14    | Pt    | Mg      | Bu <sub>4</sub> NBF <sub>4</sub>  | rt    | NMP                | 10 mA   | 4 h | 51                     |
| 15    | Pt    | Mg      | Bu <sub>4</sub> NBF <sub>4</sub>  | rt    | DMF                | 5 mA    | 4 h | 37                     |
| 16    | Pt    | Mg      | Bu <sub>4</sub> NBF <sub>4</sub>  | rt    | DMF                | 7.5 mA  | 4 h | 58                     |
| 17    | Pt    | Mg      | Bu <sub>4</sub> NBF <sub>4</sub>  | rt    | DMF                | 12.5 mA | 4 h | 87                     |
| 18    | Pt    | Mg      | Bu <sub>4</sub> NBF <sub>4</sub>  | rt    | DMF                | 15 mA   | 4 h | 63                     |
| 19    | Pt    | Mg      | Bu <sub>4</sub> NBF <sub>4</sub>  | rt    | DMF                | 20 mA   | 2 h | 72                     |
| 20    | Pt    | Mg      | Bu <sub>4</sub> NBF <sub>4</sub>  | rt    | DMF                | 5 mA    | 8 h | 69                     |
| 21    | Pt    | Mg      | Bu <sub>4</sub> NBF <sub>4</sub>  | 0 °C  | DMF                | 10 mA   | 4 h | 62                     |
| 22    | Pt    | Mg      | Bu <sub>4</sub> NBF <sub>4</sub>  | 40 °C | DMF                | 10 mA   | 4 h | 76                     |

[a] Reaction condition: **1** (0.3 mmol), TBABF<sub>4</sub> (0.3 mmol), CO<sub>2</sub> (1 atm), DMF (5 mL), constant current  $i = 10$  mA, undivided cell, rt. [b] Determined by NMR spectroscopy using mesitylene as the internal standard. [c] Isolated yield

## 5. General procedure for the gram-scale reaction

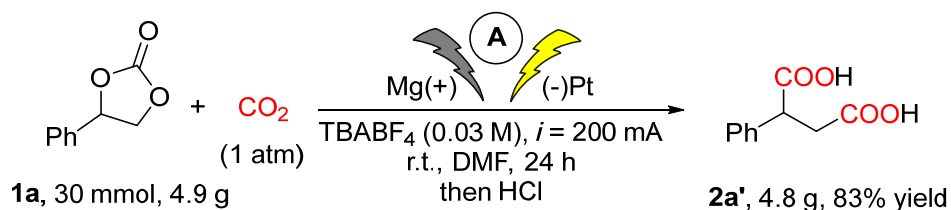

A 500 mL oven-dried electrochemical cell containing a stir bar was evacuated and back-filled under  $\text{CO}_2$  flow for at least 3 times. **1a** (30 mmol),  $\text{TBABF}_4$  (15 mmol) and DMF (400 mL) were added to the cell and the cell was installed with a Pt cathode and Mg anode and the cell was closed under  $\text{CO}_2$  atmosphere. Then, the reaction mixture was electrolyzed under a constant current of 200 mA for 24 h at room temperature. Then the reaction mixture was carefully quenched with HCl (1M, 300 mL) at  $0^\circ\text{C}$  and extracted three times with ethyl acetate ( $3 \times 300$  mL). The combined organic layers were washed with brine ( $2 \times 300$  mL) and dried over  $\text{Na}_2\text{SO}_4$ . The solvents were removed under reduced pressure and the crude residue was purified by flash column chromatography (petroleum ether/ethyl acetate/AcOH 1/1/0.005) to give desired product.

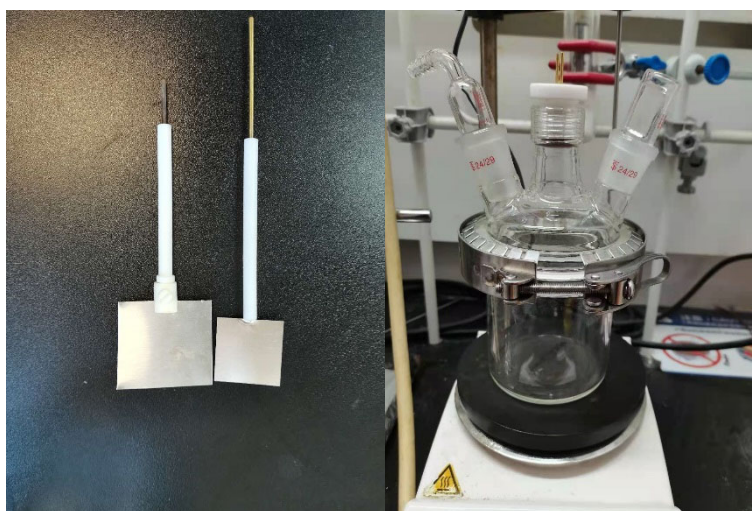

**Figure S2.** Photos for the gram-scale reaction. Pt 30 mm  $\times$  30 mm  $\times$  0.1 mm), Mg (50 mm  $\times$  60 mm  $\times$  0.5 mm). Electrochemical cell: 400 mL.

## 6. Characterization of products

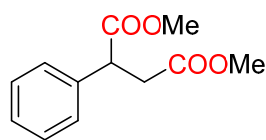

**Dimethyl 2-phenylsuccinate (2a).** White solid, 52 mg, 78% yield, m.p.: 60 – 62 °C.  $^1\text{H NMR}$  (400 MHz, Chloroform-*d*)  $\delta$  7.32 – 7.26 (m, 5H), 4.09 (dd,  $J = 10.1, 5.2$  Hz, 1H), 3.67 (d,  $J = 2.0$  Hz, 6H), 3.21 (dd,  $J = 17.0, 10.1$  Hz, 1H), 2.67 (dd,  $J = 17.0, 5.2$  Hz, 1H).  $^{13}\text{C NMR}$  (101 MHz, Chloroform-*d*)  $\delta$  173.4, 171.9, 137.6, 128.8, 127.7, 127.6, 52.3, 51.8, 47.0, 37.6. **HRMS** (ESI-TOF)  $m/z$ :  $[\text{M}+\text{H}]^+$  Calcd for  $\text{C}_{12}\text{H}_{15}\text{O}_4$  223.0970; Found 223.0963. **IR** (neat  $\text{cm}^{-1}$ )  $\nu$  3031, 2953, 1735, 1436, 699

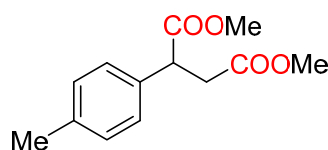

**Dimethyl 2-(*p*-tolyl) succinate (2b).** White solid, 42 mg, 57% yield.  $^1\text{H NMR}$  (400 MHz, Chloroform-*d*)  $\delta$  7.18 – 7.12 (m, 4H), 4.06 (dd,  $J = 10.1, 5.3$  Hz, 1H), 3.67 (s, 6H), 3.19 (dd,  $J = 17.0, 10.1$  Hz, 1H), 2.65 (dd,  $J = 16.9, 5.3$  Hz, 1H), 2.32 (s, 3H).  $^{13}\text{C NMR}$  (101 MHz, Chloroform-*d*)  $\delta$  173.5, 172.0, 137.3, 134.6, 129.5, 127.5, 52.2, 51.7, 46.6, 37.6, 20.9. **HRMS** (ESI-TOF)  $m/z$ :  $[\text{M}+\text{Na}]^+$  Calcd for  $\text{C}_{13}\text{H}_{16}\text{NaO}_4$  259.0946; Found 259.0947. **IR** (neat  $\text{cm}^{-1}$ )  $\nu$  2953, 2341, 1733, 1371, 817

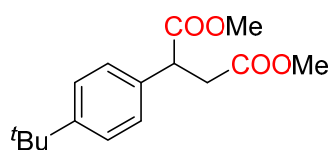

**Dimethyl 2-(4-(*tert*-butyl) phenyl) succinate (2c).** White solid, 60 mg, 72% yield, m.p.: 94 – 96 °C.  $^1\text{H NMR}$  (400 MHz, Chloroform-*d*)  $\delta$  7.26 (d,  $J = 8.4$  Hz, 2H), 7.12 (d,  $J = 8.3$  Hz, 2H), 3.99 (dd,  $J = 10.4, 4.9$  Hz, 1H), 3.59 (s, 6H), 3.12 (dd,  $J = 17.0, 10.4$  Hz, 1H), 2.59 (d,  $J = 5.0$  Hz, 1H), 1.22 (s, 9H).  $^{13}\text{C NMR}$  (101 MHz, Chloroform-*d*)  $\delta$  173.5, 172.0, 150.4, 134.5, 127.2, 125.7, 52.1, 51.7, 46.5, 37.5, 34.4, 31.2. **HRMS** (ESI-TOF)  $m/z$ :  $[\text{M}+\text{Na}]^+$  Calcd for  $\text{C}_{16}\text{H}_{22}\text{NaO}_4$  301.1415; Found 301.1414. **IR** (neat  $\text{cm}^{-1}$ ), 2953, 1738, 1513, 1436, 849

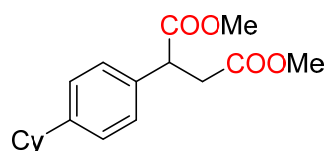

**Dimethyl 2-(4-cyclohexylphenyl) succinate (2d).** White solid, 56 mg, 62%.  $^1\text{H NMR}$  (400 MHz, Chloroform-*d*)  $\delta$  7.20 – 7.14 (m, 4H), 4.06 (dd,  $J = 10.4, 4.9$  Hz, 1H), 3.67 (s, 6H), 3.20 (dd,  $J = 17.0, 10.4$  Hz, 1H), 2.64 (dd,  $J = 17.0, 4.9$  Hz, 1H), 2.49 – 2.44 (m, 1H), 1.86 – 1.80 (m, 4H), 1.74 (ddt,  $J = 12.0, 2.9, 1.4$  Hz, 1H), 1.44 – 1.32 (m, 4H), 1.26 – 1.22 (m, 1H).  $^{13}\text{C NMR}$  (101 MHz, Chloroform-*d*)  $\delta$  173.5, 172.0, 147.4, 134.8, 127.4, 127.2, 52.2, 51.7, 46.6, 44.0, 37.6, 34.3, 26.7, 26.0. **HRMS** (ESI-TOF)  $m/z$ :  $[\text{M}+\text{Na}]^+$  Calcd for  $\text{C}_{18}\text{H}_{24}\text{NaO}_4$  327.1572; Found 327.1568. **IR** (neat  $\text{cm}^{-1}$ )  $\nu$  2953, 2924, 1738, 1342, 824, 724.

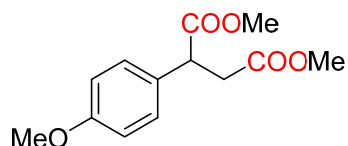

**Dimethyl 2-(4-methoxyphenyl) succinate (2e).** White solid, 40 mg, 53 % yield.  $^1\text{H NMR}$  (400 MHz, Chloroform-*d*)  $\delta$  7.19 (d,  $J = 8.7$  Hz, 2H), 6.85 (d,  $J = 8.7$  Hz, 2H), 4.03 (dd,  $J = 9.9$ , 5.4 Hz, 1H), 3.78 (s, 3H), 3.66 (d,  $J = 1.7$  Hz, 6H), 3.26 – 3.10 (m, 1H), 2.64 (dd,  $J = 16.9$ , 5.5 Hz, 1H).  $^{13}\text{C NMR}$  (101 MHz, Chloroform-*d*)  $\delta$  173.6, 171.9, 159.0, 129.6, 128.7, 114.2, 55.2, 52.2, 51.8, 46.2, 37.6. **HRMS** (ESI-TOF)  $m/z$ :  $[\text{M}+\text{Na}]^+$  Calcd for  $\text{C}_{13}\text{H}_{16}\text{NaO}_5$  275.0895; Found 275.0900. **IR** (neat  $\text{cm}^{-1}$ )  $\nu$  2953, 2923, 1731, 1256, 830.

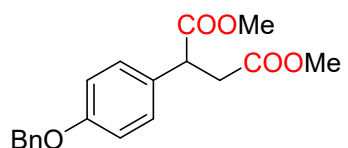

**Dimethyl 2-(4-(benzyloxy) phenyl) succinate (2f).** White solid, 40 mg, 41% yield, m.p.: 158 – 160 °C.  $^1\text{H NMR}$  (400 MHz, Chloroform-*d*)  $\delta$  7.43 – 7.31 (m, 5H), 7.20 (d,  $J = 8.5$  Hz, 2H), 6.93 (d,  $J = 8.5$  Hz, 2H), 5.04 (s, 2H), 4.04 (dd,  $J = 10.0$ , 5.4 Hz, 1H), 3.67 (d,  $J = 1.9$  Hz, 6H), 3.18 (dd,  $J = 16.9$ , 10.0 Hz, 1H), 2.65 (dd,  $J = 16.9$ , 5.4 Hz, 1H).  $^{13}\text{C NMR}$  (101 MHz, Chloroform-*d*)  $\delta$  173.6, 171.9, 158.2, 136.8, 129.9, 128.7, 128.5, 127.9, 127.4, 115.1, 70.0, 52.2, 51.8, 46.2, 37.6. **HRMS** (ESI-TOF)  $m/z$ :  $[\text{M}+\text{H}]^+$  Calcd for  $\text{C}_{19}\text{H}_{21}\text{O}_5$  329.1389; Found 329.1380. **IR** (neat  $\text{cm}^{-1}$ )  $\nu$  2955, 2923, 1737, 1246, 848.

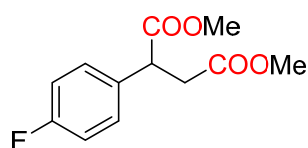

**Dimethyl 2-(4-fluorophenyl) succinate (2g).** White solid, 38 mg, 53% yield, m.p.: 64 – 66 °C.  $^1\text{H NMR}$  (400 MHz, Chloroform-*d*)  $\delta$  7.20 – 7.16 (m, 2H), 6.96 – 6.92 (m, 2H), 4.00 (dd,  $J = 9.7$ , 5.6 Hz, 1H), 3.60 (d,  $J = 4.6$  Hz, 6H), 3.10 (dd,  $J = 16.9$ , 9.7 Hz, 1H), 2.59 (dd,  $J = 16.9$ , 5.6 Hz, 1H).  $^{13}\text{C NMR}$  (101 MHz, Chloroform-*d*)  $\delta$  173.2, 171.7, 162.2 (d,  $J = 246.5$  Hz), 133.3 (d,  $J = 3.5$  Hz), 129.3 (d,  $J = 8.1$  Hz), 115.7 (d,  $J = 21.5$  Hz), 52.3, 51.8, 46.2, 37.5.  $^{19}\text{F NMR}$  (376 MHz, Chloroform-*d*)  $\delta$  -114.61. **HRMS** (ESI-TOF)  $m/z$ :  $[\text{M}+\text{Na}]^+$  Calcd for  $\text{C}_{12}\text{H}_{13}\text{FNaO}_4$  263.0695; Found 263.0686. **IR** (neat  $\text{cm}^{-1}$ )  $\nu$  2955, 2923, 1735, 1377, 822.

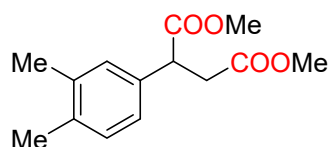

**Dimethyl 2-(3,4-dimethylphenyl) succinate (2h).** White solid, 50 mg, 67% yield, m.p.: 46 – 48 °C.  $^1\text{H NMR}$  (400 MHz, Chloroform-*d*)  $\delta$  7.10 – 6.99 (m, 3H), 4.03 (dd,  $J = 10.2$ , 5.2 Hz, 1H), 3.68 (d,  $J = 1.1$  Hz, 6H), 3.20 (dd,  $J = 17.0$ , 10.2 Hz, 1H), 2.64 (dd,  $J = 17.0$ , 5.1 Hz, 1H), 2.24 (d,  $J = 5.5$  Hz, 6H).  $^{13}\text{C NMR}$  (101 MHz, Chloroform-*d*)  $\delta$  173.6, 172.0, 137.0, 135.9, 135.0, 130.0, 128.8, 124.9, 52.2, 51.7, 46.5, 37.6, 19.7, 19.3. **HRMS** (ESI-TOF)  $m/z$ :  $[\text{M}+\text{Na}]^+$  Calcd for  $\text{C}_{14}\text{H}_{18}\text{NaO}_4$  273.1102; Found 273.1097. **IR** (neat  $\text{cm}^{-1}$ )  $\nu$  2952, 1738, 1384, 1202, 848, 737.

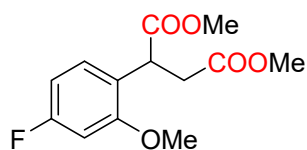

**Dimethyl 2-(4-fluoro-2-methoxyphenyl) succinate (2i).** White solid, 30 mg, 37% yield.  $^1\text{H NMR}$  (400 MHz, Chloroform-*d*)  $\delta$  7.13 – 7.09 (m, 1H), 6.63 – 6.59 (m, 2H), 4.36 (dd,  $J = 9.3, 5.5$  Hz, 1H), 3.80 (s, 3H), 3.66 (d,  $J = 0.7$  Hz, 6H), 3.11 (dd,  $J = 16.8, 9.3$  Hz, 1H), 2.57 (dd,  $J = 16.8, 5.6$  Hz, 1H).  $^{13}\text{C NMR}$  (101 MHz, Chloroform-*d*)  $\delta$  173.5, 172.2, 163.0 (d,  $J = 245.8$  Hz), 157.7 (d,  $J = 10.0$  Hz), 129.7 (d,  $J = 9.9$  Hz), 122.3 (d,  $J = 3.1$  Hz), 107.0 (d,  $J = 21.3$  Hz), 99.3 (d,  $J = 25.7$  Hz), 55.6, 52.2, 51.7, 41.2, 36.3.  $^{19}\text{F NMR}$  (565 MHz, Chloroform-*d*)  $\delta$  -116.60. **HRMS** (ESI-TOF)  $m/z$ :  $[\text{M}+\text{Na}]^+$  Calcd for  $\text{C}_{13}\text{H}_{15}\text{FNaO}_5$  293.0801; Found 293.0797. **IR** (neat  $\text{cm}^{-1}$ )  $\nu$  2954, 2924, 1736, 1230, 837, 759.

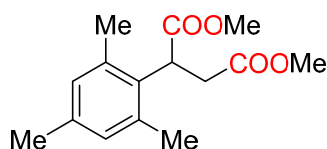

**Dimethyl 2-mesitylsuccinate (2j).** White solid, 40 mg, 51% yield, m.p.: 57 – 59 °C.  $^1\text{H NMR}$  (400 MHz, Chloroform-*d*)  $\delta$  6.85 (s, 2H), 4.64 (dd,  $J = 9.5, 4.5$  Hz, 1H), 3.69 (d,  $J = 14.1$  Hz, 6H), 3.31 (dd,  $J = 16.7, 9.5$  Hz, 1H), 2.42 (dd,  $J = 16.7, 4.5$  Hz, 1H), 2.25 (s, 9H).  $^{13}\text{C NMR}$  (101 MHz, Chloroform-*d*)  $\delta$  174.3, 172.5, 136.7, 136.3, 132.6, 129.8, 52.3, 51.8, 41.6, 35.1, 20.7. **HRMS** (ESI-TOF)  $m/z$ :  $[\text{M}+\text{Na}]^+$  Calcd for  $\text{C}_{15}\text{H}_{20}\text{NaO}_4$  287.1259; Found 287.1257. **IR** (neat  $\text{cm}^{-1}$ )  $\nu$  2952, 2923, 1736, 1378, 1198, 825, 731.

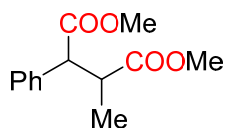

**Dimethyl 2-methyl-3-phenylsuccinate (2k).** White solid, 33 mg, 47% yield, *trans/cis* = 3:1.  $^1\text{H NMR}$  (400 MHz, Chloroform-*d*)  $\delta$  7.32 – 7.23 (m, 5H), 3.81 (d,  $J = 10.8$  Hz, 1H), 3.67 (s, 3H), 3.42 (s, 3H), 3.25 (dq,  $J = 10.9, 6.9$  Hz, 1H), 1.29 (d,  $J = 6.8$  Hz, 3H).  $^{13}\text{C NMR}$  (101 MHz, Chloroform-*d*) mixture of isomers:  $\delta$  176.1, 174.5, 173.6, 172.6, 136.6, 136.2, 128.8, 128.5, 128.3, 128.2, 127.7, 127.6, 54.6, 54.0, 52.1, 51.9, 51.5, 43.6, 42.2, 16.3, 15.3. **HRMS** (ESI-TOF)  $m/z$ :  $[\text{M}+\text{Na}]^+$  Calcd for  $\text{C}_{13}\text{H}_{16}\text{NaO}_4$  259.0946; Found 259.0940. **IR** (neat  $\text{cm}^{-1}$ )  $\nu$  2953, 2924, 1732, 1377, 699.

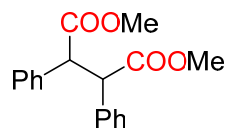

**Dimethyl 2,3-diphenylsuccinate (2l).** White solid, 67 mg, 75% yield, *trans/cis* = 3:1. *trans*-isomer:  $^1\text{H NMR}$  (400 MHz, Chloroform-*d*)  $\delta$  7.21 – 7.12 (m, 6H), 7.08 – 7.00 (m, 4H), 4.27 (s, 2H), 3.72 (s, 6H). *Trans*- $^{13}\text{C NMR}$  (101 MHz, Chloroform-*d*)  $\delta$  173.6, 135.5, 128.4, 128.3, 127.4, 54.6, 52.4. *cis*-isomer:  $^1\text{H NMR}$  (400 MHz, Chloroform-*d*)  $\delta$  7.50 – 7.48 (m, 4H), 7.37 – 7.27 (m, 6H), 4.40 (s, 2H), 3.41 (s, 6H). *Cis*- $^{13}\text{C NMR}$  (101 MHz, Chloroform-*d*)  $\delta$  171.8, 136.3, 128.7, 128.3, 127.9, 54.9, 51.9. **HRMS** (ESI-TOF)  $m/z$ :  $[\text{M}+\text{Na}]^+$  Calcd for  $\text{C}_{18}\text{H}_{18}\text{NaO}_4$  321.1102; Found 321.1096. **IR** (neat  $\text{cm}^{-1}$ )  $\nu$  2954, 1740, 1436, 1260, 763.

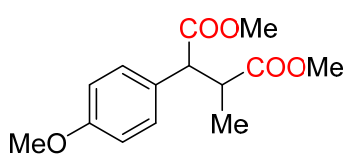

**Dimethyl 2-(4-methoxyphenyl)-3-methylsuccinate (2m).**

White solid, 17 mg, 22% yield, *trans/cis* = 5:1.  $^1\text{H NMR}$  (400 MHz, Chloroform-*d*)  $\delta$  7.23 (d,  $J$  = 8.7 Hz, 2H), 6.82 (d,  $J$  = 8.7 Hz, 2H), 3.77 (s, 3H), 3.73 (d,  $J$  = 6.7 Hz, 1H), 3.67 (s, 3H), 3.44 (s, 3H), 3.21 (dq,  $J$  = 11.0, 6.9 Hz, 1H), 1.27 (d,  $J$  = 6.8 Hz, 3H).  $^{13}\text{C NMR}$  (101 MHz, Chloroform-*d*) mixture of isomers:  $\delta$  174.6, 172.9, 129.4, 129.3, 128.7, 114.2, 113.9, 55.1, 53.9, 52.0, 51.5, 43.8, 42.3, 30.8, 16.3. **HRMS** (ESI-TOF)  $m/z$ :  $[\text{M}+\text{H}]^+$  Calcd for  $\text{C}_{14}\text{H}_{19}\text{O}_5$  267.1232; Found 267.1229. **IR** (neat  $\text{cm}^{-1}$ )  $\nu$  2952, 2923, 1731, 1251, 829.

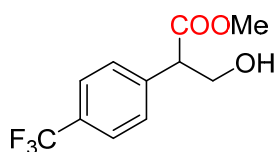

**Methyl 3-hydroxy-2-(4-(trifluoromethyl) phenyl) propanoate (3n).**

White solid, 41 mg, 55% yield.  $^1\text{H NMR}$  (400 MHz, Chloroform-*d*)  $\delta$  7.60 (d,  $J$  = 8.7 Hz, 2H), 7.40 (d,  $J$  = 8.0 Hz, 2H), 4.13 (t,  $J$  = 9.6 Hz, 1H), 3.91 (dd,  $J$  = 8.0, 5.1 Hz, 1H), 3.88 – 3.84 (m, 1H), 3.72 (s, 3H), 2.51 (s, 1H).  $^{13}\text{C NMR}$  (101 MHz, Chloroform-*d*)  $\delta$  172.9, 139.5, 130.0 (d,  $J$  = 32.6 Hz), 128.6, 125.7 (q,  $J$  = 3.8 Hz), 125.2, 122.5, 64.2, 53.5, 52.4.  $^{19}\text{F NMR}$  (565 MHz, Chloroform-*d*)  $\delta$  -62.67. **HRMS** (ESI-TOF)  $m/z$ :  $[\text{M}-\text{H}]^-$  Calcd for  $\text{C}_{11}\text{H}_{10}\text{F}_3\text{O}_3$  247.0582; Found 247.0589. **IR** (neat  $\text{cm}^{-1}$ )  $\nu$  3357, 2957, 1735, 1327, 841.

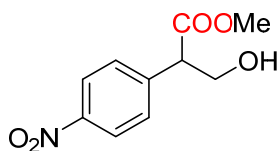

**Methyl 3-hydroxy-2-(4-nitrophenyl) propanoate (3o).**

White solid, 25 mg, 37% yield, m.p.: 110 – 112 °C.  $^1\text{H NMR}$  (400 MHz, Chloroform-*d*)  $\delta$  8.21 (d,  $J$  = 8.7 Hz, 2H), 7.47 (d,  $J$  = 8.4 Hz, 2H), 4.15 – 4.11 (m, 1H), 3.98 – 3.91 (m, 2H), 3.74 (s, 3H), 2.36 (t,  $J$  = 6.5 Hz, 1H).  $^{13}\text{C NMR}$  (101 MHz, Chloroform-*d*)  $\delta$  172.3, 147.5, 142.9, 129.2, 123.9, 64.0, 53.4, 52.5. **HRMS** (ESI-TOF)  $m/z$ :  $[\text{M}-\text{H}]^-$  Calcd for  $\text{C}_{10}\text{H}_{10}\text{NO}_5$  224.0559; Found 224.0564. **IR** (neat  $\text{cm}^{-1}$ )  $\nu$  3416, 2954, 2924, 1727, 1515, 1345, 851.

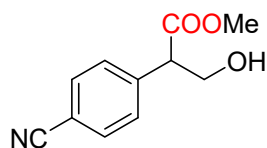

**Methyl 2-(4-cyanophenyl)-3-hydroxypropanoate (3p).**

White solid, 27 mg, 49% yield.  $^1\text{H NMR}$  (400 MHz, Chloroform-*d*)  $\delta$  7.63 (d,  $J$  = 7.8 Hz, 2H), 7.40 (d,  $J$  = 7.9 Hz, 2H), 4.09 (d,  $J$  = 9.9 Hz, 1H), 3.88 (q,  $J$  = 10.9, 8.0 Hz, 2H), 3.72 (s, 3H), 2.49 (s, 1H).  $^{13}\text{C NMR}$  (101 MHz, Chloroform-*d*)  $\delta$  172.4, 140.9, 132.5, 129.1, 118.4, 111.6, 63.9, 53.6, 52.5. **HRMS** (ESI-TOF)  $m/z$ :  $[\text{M}-\text{H}]^-$  Calcd for  $\text{C}_{11}\text{H}_{10}\text{NO}_3$  204.0660; Found 204.0670. **IR** (neat  $\text{cm}^{-1}$ )  $\nu$  3436, 2954, 2924, 2230, 1733, 837.



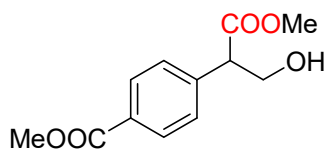

**Methyl 4-(3-hydroxy-1-methoxy-1-oxopropan-2-yl)**

**benzoate (3q).** White solid, 51 mg, 72% yield.  $^1\text{H NMR}$  (400 MHz, Chloroform-*d*)  $\delta$  7.99 (d,  $J = 8.0$  Hz, 2H), 7.33 (d,  $J = 7.9$  Hz, 2H), 4.12 (dd,  $J = 10.8, 8.3$  Hz, 1H), 3.91 – 3.88 (m, 4H), 3.83 (dd,  $J = 10.8, 5.2$  Hz, 1H), 3.70 (s, 3H), 2.60 (s, 1H).  $^{13}\text{C NMR}$  (101 MHz, Chloroform-*d*)  $\delta$  172.8, 166.6, 140.7, 130.0, 129.5, 128.2, 64.2, 53.8, 52.2, 52.0. **HRMS** (ESI-TOF)  $m/z$ :  $[\text{M}+\text{Na}]^+$  Calcd for  $\text{C}_{12}\text{H}_{14}\text{NaO}_5$  261.0738; Found 261.0737. **IR** (neat  $\text{cm}^{-1}$ )  $\nu$  3446, 2954, 1724, 1166, 824.

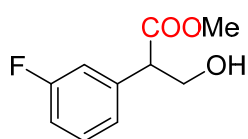

**Methyl 2-(3-fluorophenyl)-3-hydroxypropanoate (3r).** White solid,

45 mg, 76% yield.  $^1\text{H NMR}$  (400 MHz, Chloroform-*d*)  $\delta$  7.30 (tdd,  $J = 7.2, 6.0, 1.3$  Hz, 1H), 7.06 – 6.96 (m, 3H), 4.14 – 4.08 (m, 1H), 3.86 – 3.80 (m, 2H), 3.72 (s, 3H), 2.44 (s, 1H).  $^{13}\text{C NMR}$  (101 MHz, Chloroform-*d*)  $\delta$  173.0, 162.8 (d,  $J = 246.7$  Hz), 137.8 (d,  $J = 7.4$  Hz), 130.3 (d,  $J = 8.5$  Hz), 123.9 (d,  $J = 2.9$  Hz), 115.2 (d,  $J = 22.1$  Hz), 114.7 (d,  $J = 21.2$  Hz), 64.3, 53.4, 52.3.  $^{19}\text{F NMR}$  (376 MHz, Chloroform-*d*)  $\delta$  -112.28. **HRMS** (ESI,  $m/z$ ):  $[\text{M}+\text{Na}]^+$  calcd for  $\text{C}_{10}\text{H}_{11}\text{FNaO}_3$  221.0589; Found 221.0583. **IR** (neat  $\text{cm}^{-1}$ )  $\nu$  3418, 2954, 2931, 1737, 1249, 691.

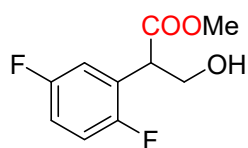

**Methyl 2-(2,5-difluorophenyl)-3-hydroxypropanoate (3s).** White

solid, 37 mg, 57% yield.  $^1\text{H NMR}$  (400 MHz, Chloroform-*d*)  $\delta$  7.03 – 6.93 (m, 3H), 4.12 – 4.05 (m, 2H), 3.86 – 3.83 (m, 1H), 3.73 (s, 3H), 2.67 (s, 1H).  $^{13}\text{C NMR}$  (101 MHz, Chloroform-*d*)  $\delta$  172.7, 157.5 (dd,  $J = 451.8, 2.3$  Hz), 157.5 (dd,  $J = 33.7, 2.5$  Hz), 124.7 (d,  $J = 7.9$  Hz), 124.5 (d,  $J = 8.1$  Hz), 116.88 – 115.6 (m), 63.2, 52.5, 46.6.  $^{19}\text{F NMR}$  (376 MHz, Chloroform-*d*)  $\delta$  -118.09 (d,  $J = 17.9$  Hz), -123.71 (d,  $J = 16.7$  Hz). **HRMS** (ESI-TOF)  $m/z$ :  $[\text{M}+\text{Na}]^+$  Calcd for  $\text{C}_{10}\text{H}_{10}\text{F}_2\text{NaO}_3$  239.0495; Found 239.0493. **IR** (neat  $\text{cm}^{-1}$ )  $\nu$  3435, 2955, 2925, 1736, 1377, 875, 816.

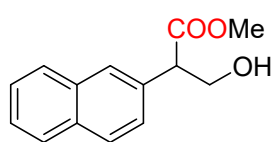

**Methyl 3-hydroxy-2-(naphthalen-2-yl) propanoate (3t).** White

solid, 38 mg, 53% yield.  $^1\text{H NMR}$  (400 MHz, Chloroform-*d*)  $\delta$  7.84 – 7.81 (m, 3H), 7.74 (d,  $J = 1.7$  Hz, 1H), 7.52 – 7.46 (m, 2H), 7.39 (dd,  $J = 8.5, 1.9$  Hz, 1H), 4.25 (dd,  $J = 11.1, 8.7$  Hz, 1H), 4.03 (dd,  $J = 8.6, 5.3$  Hz, 1H), 3.91 (dd,  $J = 11.1, 5.3$  Hz, 1H), 3.73 (s, 3H), 2.44 (s, 1H).  $^{13}\text{C NMR}$  (101 MHz, Chloroform-*d*)  $\delta$  173.5, 133.3, 132.9, 132.7, 128.6, 127.7, 127.6, 127.1, 126.3, 126.1, 125.8, 64.5, 53.9, 52.2. **HRMS** (ESI-TOF)  $m/z$ :  $[\text{M}+\text{Na}]^+$  Calcd for  $\text{C}_{14}\text{H}_{14}\text{NaO}_3$  253.0840; Found 253.0839. **IR** (neat  $\text{cm}^{-1}$ )  $\nu$  3445, 2951, 1733, 1599, 749.

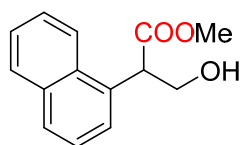

**Methyl 3-hydroxy-2-(naphthalen-1-yl) propanoate (3u).** White solid, 45 mg, 65% yield.  $^1\text{H NMR}$  (400 MHz, Chloroform-*d*)  $\delta$  8.11 (d,  $J$  = 8.4 Hz, 1H), 7.85 (dd,  $J$  = 30.0, 7.8 Hz, 2H), 7.59 – 7.50 (m, 2H), 7.44 (t,  $J$  = 7.6 Hz, 1H), 7.38 (d,  $J$  = 7.1 Hz, 1H), 4.69 (dd,  $J$  = 9.1, 4.6 Hz, 1H), 4.32 (t,  $J$  = 10.3 Hz, 1H), 3.92 – 3.88 (m, 1H), 3.72 (s, 3H), 2.64 (s, 1H).  $^{13}\text{C NMR}$  (101 MHz, Chloroform-*d*)  $\delta$  174.3, 134.0, 131.7, 131.3, 129.0, 128.3, 126.6, 125.8, 125.4, 125.3, 122.8, 64.1, 52.2, 49.6. **HRMS** (ESI-TOF)  $m/z$ :  $[\text{M}+\text{Na}]^+$  Calcd for  $\text{C}_{14}\text{H}_{14}\text{NaO}_3$  253.0840; Found 253.0835. **IR** (neat  $\text{cm}^{-1}$ )  $\nu$  3456, 2958, 2924, 1732, 735.

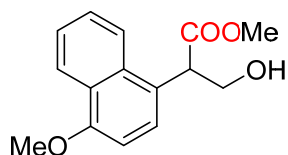

**Methyl 3-hydroxy-2-(4-methoxynaphthalen-1-yl) propanoate (3v).** White solid, 33 mg, 42%, m.p.: 106 – 108 °C.  $^1\text{H NMR}$  (400 MHz, Chloroform-*d*)  $\delta$  8.34 (d,  $J$  = 8.3 Hz, 1H), 8.04 (d,  $J$  = 8.5 Hz, 1H), 7.58 – 7.49 (m, 2H), 7.29 (d,  $J$  = 8.0 Hz, 1H), 6.77 (d,  $J$  = 8.0 Hz, 1H), 4.58 (dd,  $J$  = 9.2, 4.7 Hz, 1H), 4.28 (dd,  $J$  = 11.3, 9.2 Hz, 1H), 3.99 (s, 3H), 3.87 (dd,  $J$  = 11.3, 4.7 Hz, 1H), 3.71 (s, 3H), 2.63 (s, 1H).  $^{13}\text{C NMR}$  (101 MHz, Chloroform-*d*)  $\delta$  174.6, 155.2, 132.2, 127.1, 126.0, 125.5, 125.1, 123.6, 122.8, 122.5, 103.2, 64.1, 55.4, 52.2, 49.1. **HRMS** (ESI-TOF)  $m/z$ :  $[\text{M}+\text{Na}]^+$  Calcd for  $\text{C}_{15}\text{H}_{16}\text{NaO}_4$  283.0946; Found 283.0943. **IR** (neat  $\text{cm}^{-1}$ )  $\nu$  3440, 2958, 2924, 1732, 1250, 754.

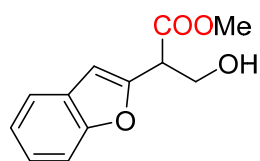

**Methyl 2-(benzofuran-2-yl)-3-hydroxypropanoate (3w).** White solid, 35 mg, 53% yield, m.p.: 49 – 51 °C.  $^1\text{H NMR}$  (400 MHz, Chloroform-*d*)  $\delta$  7.53 (d,  $J$  = 7.7 Hz, 1H), 7.45 (d,  $J$  = 8.1 Hz, 1H), 7.29 – 7.20 (m, 2H), 6.67 (s, 1H), 4.25 (dd,  $J$  = 12.1, 6.9 Hz, 1H), 4.10 (td,  $J$  = 11.4, 5.1 Hz, 2H), 3.78 (s, 3H), 2.44 (s, 1H).  $^{13}\text{C NMR}$  (101 MHz, Chloroform-*d*)  $\delta$  171.0, 154.7, 151.9, 128.1, 124.2, 122.9, 120.8, 111.1, 104.9, 62.2, 52.6, 47.9. **HRMS** (ESI-TOF)  $m/z$ :  $[\text{M}+\text{Na}]^+$  Calcd for  $\text{C}_{12}\text{H}_{12}\text{NaO}_4$  243.0633; Found 243.0632. **IR** (neat  $\text{cm}^{-1}$ )  $\nu$  3448, 2954, 2923, 1740, 1250, 751.

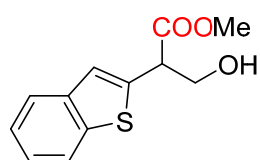

**Methyl 2-(benzo[b]thiophen-2-yl)-3-hydroxypropanoate (3x).** Red oil, 40 mg, 57% yield, m.p.: 142 – 144 °C.  $^1\text{H NMR}$  (400 MHz, Chloroform-*d*)  $\delta$  7.79 (ddd,  $J$  = 7.4, 1.8, 0.8 Hz, 1H), 7.73 (dd,  $J$  = 6.8, 1.8 Hz, 1H), 7.33 (pd,  $J$  = 7.1, 1.5 Hz, 2H), 7.23 (s, 1H), 4.20 – 4.19 (m, 2H), 4.03 – 4.00 (m, 1H), 3.77 (s, 3H), 2.49 (s, 1H).  $^{13}\text{C NMR}$  (101 MHz, Chloroform-*d*)  $\delta$  172.1, 139.5, 139.3, 137.8, 124.4, 124.3, 123.3, 123.0, 122.1, 64.3, 52.5, 49.5. **HRMS** (ESI-TOF)  $m/z$ :  $[\text{M}+\text{H}]^+$  Calcd for  $\text{C}_{12}\text{H}_{12}\text{NaO}_3\text{S}$  259.0397; Found 259.0404. **IR** (neat  $\text{cm}^{-1}$ )  $\nu$  3448,

2952, 2925, 1736, 1197, 748.

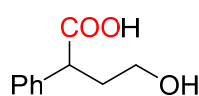

**4-Hydroxy-2-phenylbutanoic acid (3y')**. White solid, 33 mg, 62% yield.

**<sup>1</sup>H NMR** (400 MHz, DMSO-*d*<sub>6</sub>)  $\delta$  7.34 – 7.24 (m, 5H), 3.65 (t, *J* = 7.5 Hz, 1H), 3.36 – 3.26 (m, 3H), 2.13 (dd, *J* = 13.6, 6.9 Hz, 1H), 1.75 (dd, *J* = 13.4, 6.7 Hz, 1H). **<sup>13</sup>C NMR** (101 MHz, DMSO-*d*<sub>6</sub>)  $\delta$  175.2, 140.2, 128.9, 128.3, 127.3, 58.9, 47.7, 36.5. **HRMS** (ESI, *m/z*): [M-H]<sup>-</sup> calcd for target C<sub>10</sub>H<sub>11</sub>O<sub>3</sub> 179.0714; Found 179.0713. **IR** (neat cm<sup>-1</sup>)  $\nu$  3350, 2954, 2921, 1764, 694.

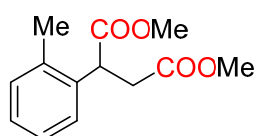

**Dimethyl 2-(*o*-tolyl) succinate (2z)**. Colorless oil, 35 mg, 50% yield.

**<sup>1</sup>H NMR** (400 MHz, Chloroform-*d*)  $\delta$  7.18 – 7.17 (m, 4H), 4.37 (dd, *J* = 10.0, 5.1 Hz, 1H), 3.67 (d, *J* = 4.5 Hz, 6H), 3.19 (dd, *J* = 17.0, 10.0 Hz, 1H), 2.60 (dd, *J* = 17.0, 5.0 Hz, 1H), 2.42 (s, 3H). **<sup>13</sup>C NMR** (101 MHz, Chloroform-*d*)  $\delta$  173.8, 172.2, 136.2, 136.1, 130.8, 127.5, 126.7, 126.5, 52.3, 51.9, 42.7, 37.0, 19.7. **HRMS** (ESI-TOF) *m/z*: [M+Na]<sup>+</sup> Calcd for C<sub>13</sub>H<sub>16</sub>NaO<sub>4</sub> 259.0946; Found 259.0944. **IR** (neat cm<sup>-1</sup>)  $\nu$  2954, 2924, 1742, 1376, 735.

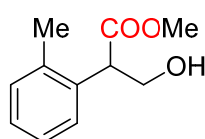

**Methyl 3-hydroxy-2-(*o*-tolyl) propanoate (3z)**. Colorless oil, 20 mg, 34% yield.

**<sup>1</sup>H NMR** (400 MHz, Chloroform-*d*)  $\delta$  7.20 – 7.15 (m, 4H), 4.15 – 4.10 (m, 2H), 3.76 – 3.67 (m, 4H), 2.43 – 2.40 (m, 4H). **<sup>13</sup>C NMR** (101 MHz, Chloroform-*d*)  $\delta$  174.2, 136.3, 133.9, 130.8, 127.6, 127.0, 126.4, 63.8, 52.1, 49.7, 19.6. **HRMS** (ESI-TOF) *m/z*: [M+Na]<sup>+</sup> Calcd for C<sub>11</sub>H<sub>14</sub>NaO<sub>3</sub> 217.0840; Found 217.0839. **IR** (neat cm<sup>-1</sup>)  $\nu$  3447, 2953, 2925, 1735, 1377, 736.

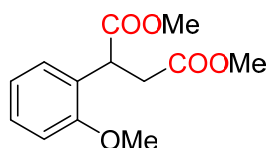

**Dimethyl 2-(2-methoxyphenyl) succinate (2aa)**. Colorless oil, 35 mg,

46% yield. **<sup>1</sup>H NMR** (400 MHz, Chloroform-*d*)  $\delta$  7.25 (td, *J* = 7.8, 1.7 Hz, 1H), 7.16 (dd, *J* = 7.5, 1.7 Hz, 1H), 6.95 – 6.84 (m, 2H), 4.42 (dd, *J* = 9.6, 5.1 Hz, 1H), 3.82 (s, 3H), 3.67 (s, 3H), 3.14 (dd, *J* = 16.8, 9.7 Hz, 1H), 2.59 (dd, *J* = 16.8, 5.1 Hz, 1H). **<sup>13</sup>C NMR** (101 MHz, Chloroform-*d*) 173.7, 172.4, 156.6, 128.9, 128.7, 126.6, 120.7, 110.8, 55.4, 52.1, 51.7, 41.7, 36.4. **HRMS** (ESI, *m/z*): [M+Na]<sup>+</sup> calcd for C<sub>13</sub>H<sub>16</sub>NaO<sub>5</sub> 275.0895; Found 275.0887. **IR** (neat cm<sup>-1</sup>)  $\nu$  2954, 2922, 1736, 1039, 760.

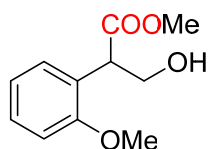

**Methyl 3-hydroxy-2-(2-methoxyphenyl) propanoate (3aa).** Colorless oil, 20 mg, 31% yield.  $^1\text{H NMR}$  (400 MHz, Chloroform-*d*)  $\delta$  7.28 – 7.24 (m, 1H), 6.86 – 6.80 (m, 3H), 4.16 – 4.08 (m, 1H), 3.85 – 3.79 (m, 5H), 3.71 (s, 3H), 2.29 (s, 1H).  $^{13}\text{C NMR}$  (101 MHz, Chloroform-*d*)  $\delta$  173.4, 159.8, 136.9, 129.8, 120.4, 113.9, 113.0, 64.5, 55.2, 53.8, 52.2. **HRMS** (ESI, *m/z*):  $[\text{M}+\text{Na}]^+$  calcd for  $\text{C}_{11}\text{H}_{14}\text{NaO}_4$  233.0789; Found 233.0783. **IR** (neat  $\text{cm}^{-1}$ )  $\nu$  3389, 2952, 2923, 1735, 755.

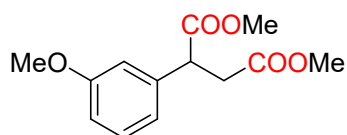

**Dimethyl 2-(3-methoxyphenyl) succinate (2ab).** Colorless oil, 27 mg, 36% yield.  $^1\text{H NMR}$  (400 MHz, Chloroform-*d*)  $\delta$  7.18 – 7.17 (m, 4H), 4.37 (dd,  $J = 10.0, 5.1$  Hz, 1H), 3.67 (d,  $J = 4.5$  Hz, 6H), 3.19 (dd,  $J = 17.0, 10.0$  Hz, 1H), 2.60 (dd,  $J = 17.0, 5.0$  Hz, 1H), 2.42 (s, 3H).  $^{13}\text{C NMR}$  (101 MHz, Chloroform-*d*)  $\delta$  173.86, 172.23, 136.25, 136.12, 130.85, 127.52, 126.71, 126.57, 52.35, 51.92, 42.77, 37.06, 19.72. **HRMS** (ESI-TOF) *m/z*:  $[\text{M}+\text{H}]^+$  Calcd for  $\text{C}_{13}\text{H}_{17}\text{O}_5$  253.1076; Found 253.1076. **IR** (neat  $\text{cm}^{-1}$ )  $\nu$  2955, 2924, 1735, 1261, 780.

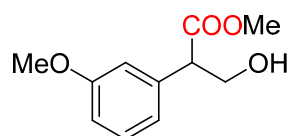

**Methyl 3-hydroxy-2-(3-methoxyphenyl) propanoate (3ab).** Colorless oil, 15 mg, 24%.  $^1\text{H NMR}$  (400 MHz, Chloroform-*d*)  $\delta$  7.26 (t,  $J = 2.0$  Hz, 1H), 6.86 – 6.80 (m, 3H), 4.14 – 4.12 (m, 1H), 3.89 – 3.79 (m, 5H), 3.71 (s, 3H), 2.29 (s, 1H).  $^{13}\text{C NMR}$  (101 MHz, Chloroform-*d*)  $\delta$  173.4, 159.8, 136.9, 129.8, 120.4, 113.9, 113.0, 64.5, 55.2, 53.8, 52.2. **HRMS** (ESI-TOF) *m/z*:  $[\text{M}+\text{Na}]^+$  Calcd for  $\text{C}_{11}\text{H}_{14}\text{NaO}_4$  233.0789; Found 233.0779. **IR** (neat  $\text{cm}^{-1}$ )  $\nu$  3447, 2953, 2925, 1735, 1244, 693.

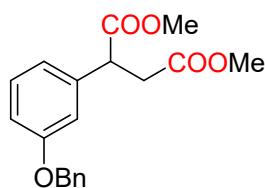

**Dimethyl 2-(3-(benzyloxy)phenyl) succinate (2ac).** White solid, 28 mg, 29% yield, m.p.: 210 – 212 °C.  $^1\text{H NMR}$  (400 MHz, Chloroform-*d*)  $\delta$  7.44 – 7.33 (m, 5H), 7.25 – 7.22 (m, 1H), 6.91 – 6.86 (m, 3H), 5.05 (s, 2H), 4.06 (dd,  $J = 10.2, 5.1$  Hz, 1H), 3.67 (d,  $J = 1.7$  Hz, 6H), 3.19 (dd,  $J = 17.0, 10.3$  Hz, 1H), 2.66 (dd,  $J = 17.0, 5.1$  Hz, 1H).  $^{13}\text{C NMR}$  (101 MHz, Chloroform-*d*)  $\delta$  173.2, 171.9, 159.0, 139.1, 136.7, 129.9, 128.5, 128.0, 127.5, 120.3, 114.3, 113.9, 69.9, 52.3, 51.8, 47.0, 37.5. **HRMS** (ESI-TOF) *m/z*:  $[\text{M}+\text{Na}]^+$  Calcd for  $\text{C}_{19}\text{H}_{20}\text{NaO}_5$  351.1208; Found 351.1202. **IR** (neat  $\text{cm}^{-1}$ )  $\nu$  2953, 2923, 1737, 1162, 782.

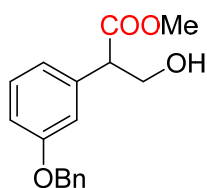

**Methyl 2-(3-(benzyloxy) phenyl)-3-hydroxypropanoate (3ac).** White solid, 22 mg, 26% yield, m.p.: 263 – 265 °C.  $^1\text{H NMR}$  (400 MHz, Chloroform-*d*)  $\delta$  7.44 – 7.33 (m, 5H), 7.26 (d,  $J = 15.6$  Hz, 1H), 6.92 – 6.85 (m, 3H), 5.05 (s, 2H), 4.15 – 4.09 (m, 1H), 3.84 – 3.80 (m, 2H), 3.70 (s, 3H), 2.26 (s, 1H).  $^{13}\text{C NMR}$  (101 MHz, Chloroform-*d*)  $\delta$  173.4, 159.0, 137.0, 136.7, 129.9, 128.5, 128.0, 127.5, 120.7, 114.8, 113.9, 70.0, 64.5, 53.8, 52.2. **HRMS** (ESI-TOF)  $m/z$ :  $[\text{M}+\text{Na}]^+$  Calcd for  $\text{C}_{17}\text{H}_{18}\text{NaO}_4$  309.1102; Found 309.1098. **IR** (neat  $\text{cm}^{-1}$ )  $\nu$  3382, 2954, 2923, 1732, 1260, 790.

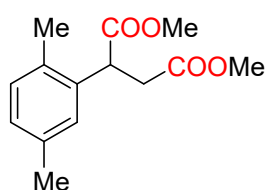

**Dimethyl 2-(2,5-dimethylphenyl) succinate (2ad).** Colorless oil, 44 mg, 59% yield.  $^1\text{H NMR}$  (600 MHz, Chloroform-*d*)  $\delta$  7.07 (d,  $J = 7.6$  Hz, 1H), 6.98 (d,  $J = 7.6$  Hz, 2H), 4.33 (dd,  $J = 10.2, 4.9$  Hz, 1H), 3.68 (d,  $J = 7.0$  Hz, 6H), 3.19 (dd,  $J = 17.0, 10.1$  Hz, 1H), 2.58 (dd,  $J = 17.1, 4.9$  Hz, 1H), 2.37 (s, 3H), 2.28 (s, 3H).  $^{13}\text{C NMR}$  (101 MHz, Chloroform-*d*)  $\delta$  173.8, 172.1, 135.9, 132.8, 130.6, 128.2, 127.3, 52.2, 51.8, 42.6, 37.0, 20.9, 19.1. **HRMS** (ESI-TOF)  $m/z$ :  $[\text{M}+\text{Na}]^+$  Calcd for  $\text{C}_{14}\text{H}_{18}\text{NaO}_4$  273.1102; Found 273.1097. **IR** (neat  $\text{cm}^{-1}$ )  $\nu$  2953, 2922, 1737, 1377, 810

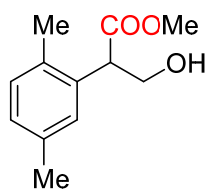

**Methyl 2-(2,5-dimethylphenyl)-3-hydroxypropanoate (3ad).** White solid, 18 mg, 29% yield, m.p.: 49 – 51 °C.  $^1\text{H NMR}$  (400 MHz, Chloroform-*d*)  $\delta$  7.09 (d,  $J = 7.7$  Hz, 1H), 6.99 (d,  $J = 7.8$  Hz, 1H), 6.95 (s, 1H), 4.16 – 4.07 (m, 2H), 3.71 – 3.68 (m, 4H), 2.41 (s, 1H), 2.35 (s, 3H), 2.29 (s, 3H).  $^{13}\text{C NMR}$  (101 MHz, Chloroform-*d*)  $\delta$  174.3, 135.9, 133.7, 133.1, 130.7, 128.4, 127.7, 63.9, 52.1, 49.7, 20.9, 19.1. **HRMS** (ESI-TOF)  $m/z$ :  $[\text{M}+\text{Na}]^+$  Calcd for  $\text{C}_{12}\text{H}_{16}\text{NaO}_3$  231.0997; Found 231.0994. **IR** (neat  $\text{cm}^{-1}$ )  $\nu$  3436, 2954, 2924, 1732, 1377, 811.

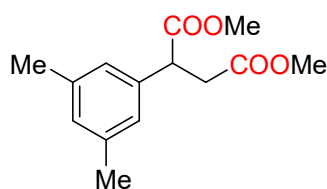

**Dimethyl 2-(3,5-dimethylphenyl) succinate (2ae).** Colorless oil, 39 mg, 52% yield.  $^1\text{H NMR}$  (400 MHz, Chloroform-*d*)  $\delta$  6.91 (s, 1H), 6.88 (s, 2H), 4.01 (dd,  $J = 10.4, 5.0$  Hz, 1H), 3.68 (s, 6H), 3.19 (dd,  $J = 17.0, 10.4$  Hz, 1H), 2.63 (dd,  $J = 17.0, 5.0$  Hz, 1H), 2.29 (s, 6H).  $^{13}\text{C NMR}$  (101 MHz, Chloroform-*d*)  $\delta$  173.5, 172.0, 138.4, 137.4, 129.3, 125.3, 52.2, 51.7, 46.8, 37.6, 21.1. **HRMS** (ESI-TOF)  $m/z$ :  $[\text{M}+\text{Na}]^+$  Calcd for  $\text{C}_{14}\text{H}_{18}\text{NaO}_4$  273.1102; Found 273.1098. **IR** (neat  $\text{cm}^{-1}$ )  $\nu$  2954, 2923, 1740, 1376, 690

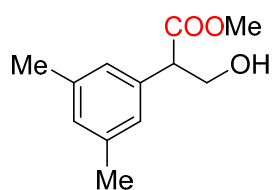

**Methyl 2-(3,5-dimethylphenyl)-3-hydroxypropanoate (3ae).**

Colorless oil, 15 mg, 24% yield.  $^1\text{H NMR}$  (400 MHz, Chloroform-*d*)  $\delta$  6.93 (s, 1H), 6.86 (s, 2H), 4.15 – 4.05 (m, 1H), 3.78 (q,  $J = 5.4$  Hz, 2H), 3.71 (s, 3H), 2.30 (s, 6H), 2.23 (s, 1H).  $^{13}\text{C NMR}$  (101 MHz, Chloroform-*d*)  $\delta$  173.7, 138.5, 135.3, 129.5, 125.8, 64.6, 53.8, 52.1, 21.2. **HRMS** (ESI,  $m/z$ ):  $[\text{M}-\text{H}]^-$  Calcd for  $\text{C}_{12}\text{H}_{15}\text{O}_3$  207.1021; Found 207.1027. **IR** (neat  $\text{cm}^{-1}$ )  $\nu$  3443, 2954, 2923, 1738, 691

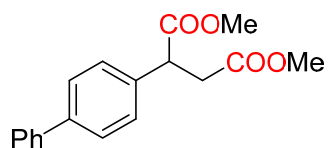

**Dimethyl 2-([1,1'-biphenyl]-4-yl)succinate (2af).** White solid,

13 mg, 11% yield.  $^1\text{H NMR}$  (400 MHz, Chloroform-*d*)  $\delta$  7.56 (td,  $J = 5.4, 1.5$  Hz, 4H), 7.43 (t,  $J = 7.6$  Hz, 2H), 7.35 (d,  $J = 7.8$  Hz, 3H), 4.15 (dd,  $J = 10.0, 5.4$  Hz, 1H), 3.70 (d,  $J = 6.4$  Hz, 6H), 3.28 – 3.21 (m, 1H), 2.74 (d,  $J = 5.3$  Hz, 1H).  $^{13}\text{C NMR}$  (101 MHz, Chloroform-*d*)  $\delta$  173.4, 171.9, 140.6, 140.5, 136.6, 128.7, 128.1, 127.6, 127.4, 127.0, 52.4, 51.9, 46.7, 37.5. **HRMS** (ESI-TOF)  $m/z$ :  $[\text{M}+\text{Na}]^+$  Calcd for  $\text{C}_{18}\text{H}_{18}\text{NaO}_4$  321.1102; Found 321.1097. **IR** (neat  $\text{cm}^{-1}$ )  $\nu$  2953, 1735, 1505, 1170, 811.

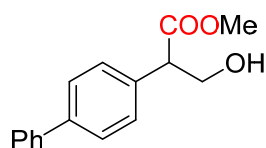

**Methyl 2-([1,1'-biphenyl]-4-yl)-3-hydroxypropanoate (3af).** White

solid, 54 mg, 66% yield, m.p.: 79 – 81 °C.  $^1\text{H NMR}$  (400 MHz, Chloroform-*d*)  $\delta$  7.58 (d,  $J = 8.0$  Hz, 4H), 7.44 (t,  $J = 7.6$  Hz, 2H), 7.37 – 7.34 (m, 3H), 4.18 (dd,  $J = 10.3, 7.8$  Hz, 1H), 3.93 – 3.86 (m, 2H), 3.74 (s, 3H), 2.51 (s, 1H).  $^{13}\text{C NMR}$  (101 MHz, Chloroform-*d*)  $\delta$  173.5, 140.7, 140.4, 134.5, 128.7, 128.5, 127.5, 127.3, 127.0, 64.5, 53.5, 52.2. **HRMS** (ESI-TOF)  $m/z$ :  $[\text{M}+\text{Na}]^+$  Calcd for  $\text{C}_{16}\text{H}_{16}\text{NaO}_3$  279.0997; Found 279.0994. **IR** (neat  $\text{cm}^{-1}$ )  $\nu$  3345, 2952, 1732, 1582, 1377, 833.

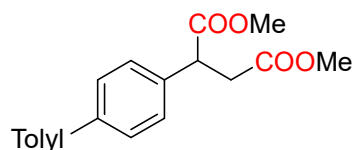

**Dimethyl 2-(4'-methyl-[1,1'-biphenyl]-4-yl)succinate (2ag).**

White solid, 7 mg, 8% yield, m.p.: 115 – 117 °C.  $^1\text{H NMR}$  (400 MHz, Chloroform-*d*)  $\delta$  7.54 (d,  $J = 8.0$  Hz, 2H), 7.47 (d,  $J = 7.9$  Hz, 2H), 7.33 (d,  $J = 8.0$  Hz, 2H), 7.24 (d,  $J = 7.8$  Hz, 2H), 4.14 (dd,  $J = 10.0, 5.3$  Hz, 1H), 3.70 (d,  $J = 5.5$  Hz, 6H), 3.24 (dd,  $J = 17.0, 10.0$  Hz, 1H), 2.71 (dd,  $J = 17.0, 5.3$  Hz, 1H), 2.39 (s, 3H).  $^{13}\text{C NMR}$  (101 MHz, Chloroform-*d*)  $\delta$  173.4, 171.9, 140.5, 137.6, 137.2, 136.3, 129.5, 128.0, 127.3, 126.8, 52.3, 51.8, 46.7, 37.6, 21.0. **HRMS** (ESI-TOF)  $m/z$ :  $[\text{M}+\text{Na}]^+$  Calcd for  $\text{C}_{19}\text{H}_{20}\text{NaO}_4$  335.1259; Found 335.1253. **IR** (neat  $\text{cm}^{-1}$ )  $\nu$  3292, 1732, 1461, 1377, 811.

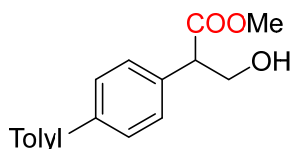

**Methyl 3-hydroxy-2-(4'-methyl-[1,1'-biphenyl]-4-yl) propanoate**

**(3ag).** White solid, 58 mg, 72% yield, m.p.: 105 – 107 °C. <sup>1</sup>H NMR (400 MHz, Chloroform-*d*) δ 7.58 (d, *J* = 7.9 Hz, 2H), 7.50 (d, *J* = 7.8 Hz, 2H), 7.36 (d, *J* = 7.9 Hz, 2H), 7.28 (d, *J* = 7.7 Hz, 2H), 4.2

(t, *J* = 8 Hz, 1H), 3.94 – 3.87 (m, 2H), 3.77 (s, 3H), 2.47 (s, 1H), 2.43 (s, 3H). <sup>13</sup>C NMR (101 MHz, Chloroform-*d*) δ 173.5, 140.6, 137.5, 137.1, 134.2, 129.4, 128.5, 127.3, 126.8, 64.5, 53.5, 52.2, 21.0. **HRMS** (ESI-TOF) *m/z*: [M+Na]<sup>+</sup> Calcd for C<sub>17</sub>H<sub>18</sub>NaO<sub>3</sub> 293.1153; Found 293.1144. **IR** (neat cm<sup>-1</sup>) ν 3400, 2955, 2924, 1732, 1381, 850.

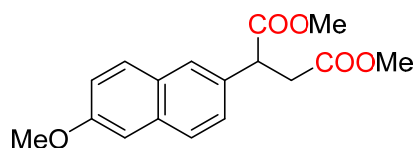

**Dimethyl 2-(6-methoxynaphthalen-2-yl) succinate**

**(2ah).** White solid, 12 mg, 13% yield. <sup>1</sup>H NMR (400 MHz, Chloroform-*d*) δ 7.70 (d, *J* = 9.0 Hz, 2H), 7.66 (d, *J* = 1.8 Hz, 1H), 7.36 (dd, *J* = 8.5, 1.9 Hz, 1H), 7.15 (dd,

*J* = 8.9, 2.6 Hz, 1H), 7.11 (d, *J* = 2.5 Hz, 1H), 4.22 (dd, *J* = 9.9, 5.4 Hz, 1H), 3.91 (s, 3H), 3.68 (d, *J* = 2.7 Hz, 6H), 3.29 (dd, *J* = 16.9, 9.9 Hz, 1H), 2.75 (dd, *J* = 16.9, 5.4 Hz, 1H). <sup>13</sup>C NMR (101 MHz, Chloroform-*d*) δ 173.5, 172.0, 157.8, 133.9, 132.7, 129.3, 128.8, 127.4, 126.5, 126.0, 119.2, 105.5, 55.3, 52.3, 51.8, 47.0, 37.6. **HRMS** (ESI-TOF) *m/z*: [M+Na]<sup>+</sup> Calcd for C<sub>17</sub>H<sub>18</sub>NaO<sub>5</sub> 325.1051; Found 325.1048. **IR** (neat cm<sup>-1</sup>) ν 2954, 1732, 1382, 1250, 748.

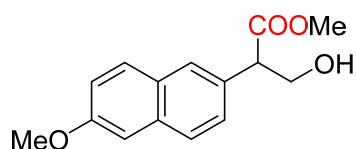

**Methyl 3-hydroxy-2-(6-methoxynaphthalen-2-yl) propanoate (3ah).**

White solid, 30 mg, 38% yield, m.p.: 97 – 99 °C. <sup>1</sup>H NMR (400 MHz, Chloroform-*d*) δ 7.71 (dd, *J* = 8.7, 4.7 Hz, 2H), 7.66 (s, 1H), 7.35 (dd, *J* = 8.5, 1.9 Hz, 1H), 7.16

(dd, *J* = 8.9, 2.6 Hz, 1H), 7.11 (d, *J* = 2.5 Hz, 1H), 4.22 (dd, *J* = 11.0, 8.6 Hz, 1H), 3.99 (dd, *J* = 8.6, 5.3 Hz, 1H), 3.91 – 3.87 (m, 4H), 3.72 (s, 3H), 2.45 (s, 1H). <sup>13</sup>C NMR (101 MHz, Chloroform-*d*) δ 173.7, 157.8, 133.9, 130.5, 129.2, 128.8, 127.4, 126.9, 126.3, 119.2, 105.5, 64.5, 55.2, 53.8, 52.1. **HRMS** (ESI-TOF) *m/z*: [M+Na]<sup>+</sup> Calcd for C<sub>15</sub>H<sub>16</sub>NaO<sub>4</sub> 283.0946; Found 283.0943. **IR** (neat cm<sup>-1</sup>) ν 3450, 2953, 1732, 1382, 1120, 748.

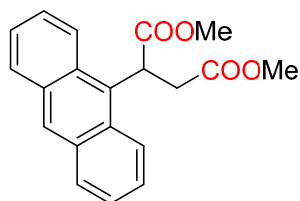

**Dimethyl 2-(anthracen-9-yl) succinate (2ai).**

White solid, 11 mg, 11% yield, m.p.: 101 – 103 °C. <sup>1</sup>H NMR (400 MHz, Chloroform-*d*) δ 7.61 (d, *J* = 7.6 Hz, 1H), 7.53 (d, *J* = 7.5 Hz, 1H), 7.44 (d, *J* = 6.7 Hz, 1H), 7.40 – 7.26 (m, 5H), 6.28 (t, *J* = 7.6 Hz, 1H), 4.96 (s, 1H), 3.76 (s, 3H), 3.67 (dd, *J* = 17.2, 6.9 Hz, 1H), 3.59 – 3.52 (m, 4H).

<sup>13</sup>C NMR (101 MHz, Chloroform-*d*) δ 172.1, 171.5, 138.5, 137.4, 134.5, 134.3, 132.0, 128.4, 127.9, 127.8, 127.5, 127.4, 127.1, 127.0, 124.4, 119.9, 52.9, 52.4, 52.0, 35.3. **HRMS** (ESI-TOF)

$m/z$ :  $[M+Na]^+$  Calcd for  $C_{20}H_{18}NaO_4$  345.1102; Found 345.1107. **IR** (neat  $cm^{-1}$ )  $\nu$  2953, 2923, 1737, 1600, 730.

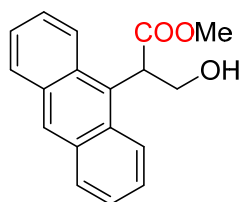

**Methyl 2-(anthracen-9-yl)-3-hydroxypropanoate (3ai).** White solid, 44 mg, 52% yield, m.p.: 71 – 73 °C.  **$^1H$  NMR** (400 MHz, Chloroform-*d*)  $\delta$  7.60 (d,  $J$  = 7.6 Hz, 1H), 7.43 – 7.26 (m, 7H), 6.28 (dd,  $J$  = 8.2, 5.2 Hz, 1H), 4.98 (s, 1H), 4.67 (dd,  $J$  = 13.4, 8.2 Hz, 1H), 4.56 (dd,  $J$  = 13.4, 5.2 Hz, 1H), 3.55 (s, 3H), 2.22 (s, 1H).  **$^{13}C$  NMR** (101 MHz, Chloroform-*d*)  $\delta$  171.7, 138.2, 136.4, 134.3, 134.0, 132.0, 128.2, 128.1, 128.0, 127.9, 127.6, 127.5, 127.1, 127.1, 60.6, 52.6, 52.4. **HRMS** (ESI-TOF)  $m/z$ :  $[M+Na]^+$  Calcd for  $C_{18}H_{16}NaO_3$  303.0997; Found 303.0992. **IR** (neat  $cm^{-1}$ )  $\nu$  3457, 2955, 2927, 1735, 1599, 776.

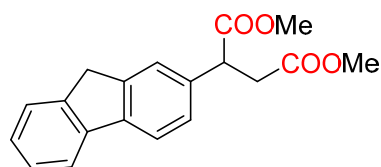

**Dimethyl 2-(9H-fluoren-2-yl) succinate (2aj).** White solid, 12 mg, 13% yield, m.p.: 106 – 108 °C.  **$^1H$  NMR** (400 MHz, Chloroform-*d*)  $\delta$  7.74 (dd,  $J$  = 11.1, 7.6 Hz, 2H), 7.53 (d,  $J$  = 7.5 Hz, 1H), 7.47 (s, 1H), 7.37 (t,  $J$  = 7.3 Hz, 1H), 7.30 (t,  $J$  = 6.7 Hz, 2H), 4.17 (dd,  $J$  = 10.0, 5.3 Hz, 1H), 3.88 (s, 2H), 3.69 (d,  $J$  = 6.3 Hz, 6H), 3.26 (dd,  $J$  = 17.0, 10.0 Hz, 1H), 2.73 (dd,  $J$  = 17.0, 5.3 Hz, 1H).  **$^{13}C$  NMR** (101 MHz, Chloroform-*d*)  $\delta$  173.6, 172.0, 143.9, 143.2, 141.3, 141.1, 136.1, 126.8, 126.7, 126.4, 125.0, 124.3, 120.1, 119.9, 52.3, 51.8, 47.2, 37.8, 36.8. **HRMS** (ESI-TOF)  $m/z$ :  $[M+Na]^+$  Calcd for  $C_{19}H_{18}NaO_4$  333.1102; Found 333.1096. **IR** (neat  $cm^{-1}$ )  $\nu$  2955, 2923, 1925, 1195, 870.

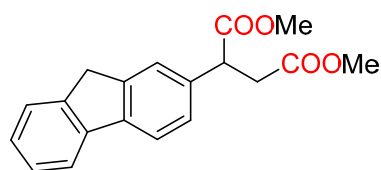

**Methyl 2-(9H-fluoren-2-yl)-3-hydroxypropanoate (3aj).** White solid, 47 mg, 58% yield, m.p.: 112 – 114 °C.  **$^1H$  NMR** (400 MHz, Chloroform-*d*)  $\delta$  7.78 (t,  $J$  = 8.5 Hz, 2H), 7.56 (d,  $J$  = 7.5 Hz, 1H), 7.49 (s, 1H), 7.40 (t,  $J$  = 7.5 Hz, 1H), 7.32 (dd,  $J$  = 15.5, 7.8 Hz, 2H), 4.22 (t,  $J$  = 10 Hz, 1H), 4.00 – 3.93 (m, 1H), 3.91 – 3.88 (m, 3H), 3.76 (s, 3H), 2.51 (s, 1H).  **$^{13}C$  NMR** (101 MHz, Chloroform-*d*)  $\delta$  173.7, 143.8, 143.2, 141.3, 141.0, 133.9, 126.81, 126.80, 126.7, 124.9, 124.7, 120.1, 119.8, 64.6, 53.9, 52.1, 36.7. **HRMS** (ESI-TOF)  $m/z$ :  $[M+Na]^+$  Calcd for  $C_{17}H_{16}NaO_3$  291.0997; Found: 291.0994. **IR** (neat  $cm^{-1}$ )  $\nu$  3661, 2953, 1736, 1166, 878.

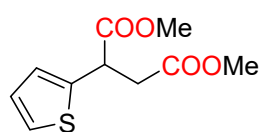

**Dimethyl 2-(thiophen-2-yl) succinate (2ak).** Red oil, 8 mg, 12% yield.  **$^1H$  NMR** (400 MHz, Chloroform-*d*)  $\delta$  7.21 (s, 1H), 6.96 – 6.94 (m, 2H), 4.38 (dd,  $J$  = 10.0, 5.3 Hz, 1H), 3.72 (s, 3H), 3.69 (s, 3H), 3.23 (dd,  $J$



= 17.0, 10.0 Hz, 1H), 2.79 (dd,  $J = 16.9, 5.3$  Hz, 1H).  $^{13}\text{C}$  NMR (101 MHz, Chloroform- $d$ )  $\delta$  172.44, 171.49, 139.48, 126.91, 125.60, 124.94, 52.61, 51.97, 42.22, 38.09. HRMS (ESI-TOF)  $m/z$ :  $[\text{M}+\text{Na}]^+$  Calcd for  $\text{C}_{10}\text{H}_{12}\text{NaO}_4\text{S}$  251.0354; Found 251.0345. IR (neat  $\text{cm}^{-1}$ )  $\nu$  2953, 2920, 1738, 1728, 703.

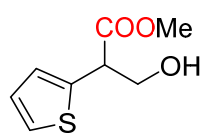

**Methyl 3-hydroxy-2-(thiophen-2-yl) propanoate (3ak).** Red oil, 21 mg, 38% yield.  $^1\text{H}$  NMR (400 MHz, Chloroform- $d$ )  $\delta$  7.25 – 7.24 (m, 1H), 6.99 – 6.98 (m, 2H), 4.13 (d,  $J = 2.2$  Hz, 2H), 3.96 – 3.90 (m, 1H), 3.75 (s, 3H), 2.32 (s, 1H).  $^{13}\text{C}$  NMR (101 MHz, Chloroform- $d$ )  $\delta$  172.58, 136.91, 126.90, 126.22, 125.20, 64.73, 52.50, 48.78. HRMS (ESI-TOF)  $m/z$ :  $[\text{M}+\text{Na}]^+$  Calcd for  $\text{C}_8\text{H}_{10}\text{NaO}_3\text{S}$  209.0248; Found 209.0241. IR (neat  $\text{cm}^{-1}$ )  $\nu$  3434, 2952, 2923, 1728, 850.

## 7. X-ray crystallographic data

Single crystals of **2a**, *trans*-**2l**, **3v**, **2ah** was obtained by recrystallization from CDCl<sub>3</sub> at room temperature. The intensities were collected on a Bruker SMART APEX CCD diffractometer equipped with a graphite monochromated Mo-K $\alpha$  ( $\lambda = 0.71073$  Å) radiation source; the data were acquired using the SMART and SAINT programs. The structures were solved by direct methods and refined on  $F^2$  by full matrix least-squares methods using the SHELXTL version 5.1 software.

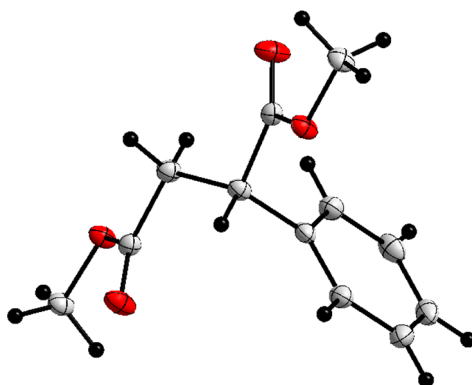

**Figure S3.** ORTEP plot of **2a**. Thermal ellipsoids are shown at 30% probability level.

**Table S2.** Crystal parameter of **2a**

|                                              |                                                |
|----------------------------------------------|------------------------------------------------|
| Formula                                      | C <sub>12</sub> H <sub>14</sub> O <sub>2</sub> |
| Formula weight                               | 255.3170                                       |
| Crystal system                               | Monoclinic                                     |
| Wavelength                                   | 0.71073                                        |
| a (Å)                                        | 5.8827(3)                                      |
| b (Å)                                        | 24.9167(9)                                     |
| c (Å)                                        | 8.1339(3)                                      |
| $\alpha$ (°)                                 | 90                                             |
| $\beta$ (°)                                  | 110.149(1)                                     |
| $\gamma$ (°)                                 | 90                                             |
| Volume (Å <sup>3</sup> )                     | 1119.28(8)                                     |
| Z                                            | 4                                              |
| T (K)                                        | 120K                                           |
| D calcd (g cm <sup>-3</sup> )                | 1.319                                          |
| $\mu$ (mm <sup>-1</sup> )                    | 0.099                                          |
| F (000)                                      | 472.0                                          |
| No. of rflns. collected                      | 1951                                           |
| No. of indep. rflns. /Rint                   | 8018/ 0.0176                                   |
| No. of obsd. rflns. [ $I_0 > 2\sigma(I_0)$ ] | 1951                                           |
| Data / restraints / parameters               | 1951/ 0 /145                                   |
| $R_1 / wR2$ [ $I_0 > 2\sigma(I_0)$ ]         | 0.0409 (1785)                                  |
| $R_1 / wR2$ (all data)                       | 0.1014 (1951)                                  |
| GOF (on $F^2$ )                              | 1.043                                          |
| CCDC No.                                     | 2234688                                        |

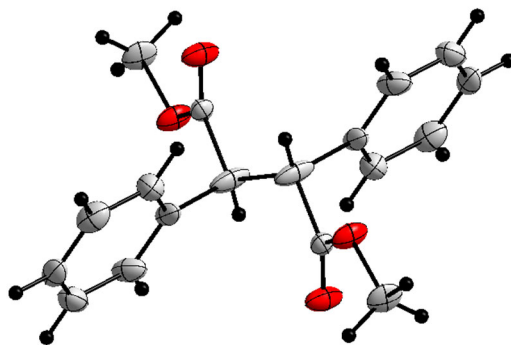

**Figure S4.** ORTEP plot of *trans*-2I. Thermal ellipsoids are shown at 30% probability level.

**Table S3.** Crystal parameter of *trans*-2I

|                                              |                                                |
|----------------------------------------------|------------------------------------------------|
| Formula                                      | C <sub>18</sub> H <sub>18</sub> O <sub>4</sub> |
| Formula weight                               | 298.1205                                       |
| Crystal system                               | Monoclinic                                     |
| Wavelength                                   | 0.71073                                        |
| a (Å)                                        | 5.8450(12)                                     |
| b (Å)                                        | 17.181(3)                                      |
| c (Å)                                        | 7.9441(15)                                     |
| $\alpha$ (°)                                 | 90                                             |
| $\beta$ (°)                                  | 107.273(5)                                     |
| $\gamma$ (°)                                 | 90                                             |
| Volume (Å <sup>3</sup> )                     | 761.8(3)                                       |
| Z                                            | 2                                              |
| T (K)                                        | 292K                                           |
| D calcd (g cm <sup>-3</sup> )                | 1.301                                          |
| $\mu$ (mm <sup>-1</sup> )                    | 0.091                                          |
| F (000)                                      | 316.0                                          |
| No. of rflns. collected                      | 1343                                           |
| No. of indep. rflns. /Rint                   | 5821/0.1244                                    |
| No. of obsd. rflns. [ $I_0 > 2\sigma(I_0)$ ] | 1343                                           |
| Data / restraints / parameters               | 1343/ 0 /101                                   |
| $R_1 / wR2$ [ $I_0 > 2\sigma(I_0)$ ]         | 0.2097 (795)                                   |
| $R_1 / wR2$ (all data)                       | 0.2355 (1343)                                  |
| GOF (on $F^2$ )                              | 1.099                                          |
| CCDC No.                                     | 2234689                                        |

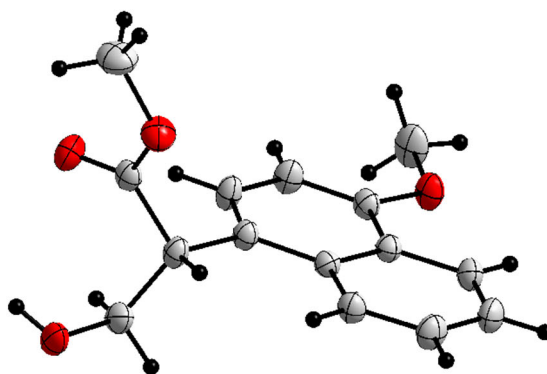

**Figure S5.** ORTEP plot of **3v**. Thermal ellipsoids are shown at 30% probability level.

**Table S4.** Crystal parameter of **3v**

|                                              |                                                |
|----------------------------------------------|------------------------------------------------|
| Formula                                      | C <sub>15</sub> H <sub>16</sub> O <sub>4</sub> |
| Formula weight                               | 260.2890                                       |
| Crystal system                               | Monoclinic                                     |
| Wavelength                                   | 1.54178                                        |
| a (Å)                                        | 10.8280(12)                                    |
| b (Å)                                        | 7.9485(9)                                      |
| c (Å)                                        | 15.2171(18)                                    |
| $\alpha$ (°)                                 | 90                                             |
| $\beta$ (°)                                  | 95.439(6)                                      |
| $\gamma$ (°)                                 | 90                                             |
| Volume (Å <sup>3</sup> )                     | 1303.8(3)                                      |
| Z                                            | 4                                              |
| T (K)                                        | 297 K                                          |
| D calcd (g cm <sup>-3</sup> )                | 1.326                                          |
| $\mu$ (mm <sup>-1</sup> )                    | 0.790                                          |
| F (000)                                      | 552.0                                          |
| No. of rflns. collected                      | 2632                                           |
| No. of indep. rflns. /Rint                   | 10313/ 0.0444                                  |
| No. of obsd. rflns. [ $I_0 > 2\sigma(I_0)$ ] | 2632                                           |
| Data / restraints / parameters               | 2632/ 0 /175                                   |
| $R_1 / wR2$ [ $I_0 > 2\sigma(I_0)$ ]         | 0.0475(2194)                                   |
| $R_1 / wR2$ (all data)                       | 0.1431(2632)                                   |
| GOF (on $F^2$ )                              | 1.068                                          |
| CCDC No.                                     | 2245962                                        |

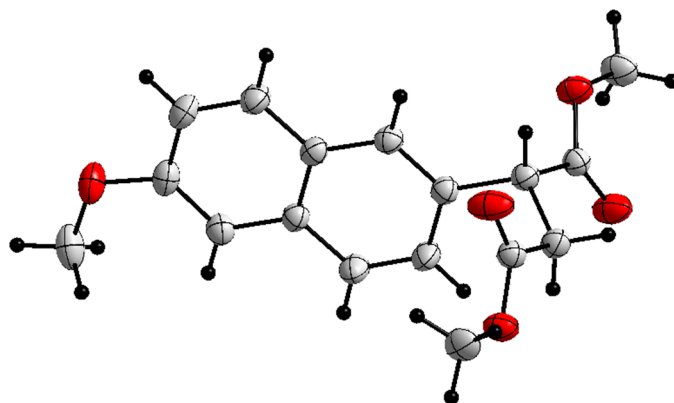

**Figure S6.** ORTEP plot of **2ah**. Thermal ellipsoids are shown at 30% probability level.

**Table S5.** Crystal parameter of **2ah**

|                                              |                                                |
|----------------------------------------------|------------------------------------------------|
| Formula                                      | C <sub>17</sub> H <sub>18</sub> O <sub>5</sub> |
| Formula weight                               | 302.1154                                       |
| Crystal system                               | Monoclinic                                     |
| Wavelength                                   | 0.71073                                        |
| a (Å)                                        | 5.8137(4)                                      |
| b (Å)                                        | 8.5017(5)                                      |
| c (Å)                                        | 16.6639(10)                                    |
| $\alpha$ (°)                                 | 99.886(3)                                      |
| $\beta$ (°)                                  | 92.872(3)                                      |
| $\gamma$ (°)                                 | 108.302(3)                                     |
| Volume (Å <sup>3</sup> )                     | 761.8(3)                                       |
| Z                                            | 2                                              |
| T (K)                                        | 297K                                           |
| D calcd (g cm <sup>-3</sup> )                | 1.311                                          |
| $\mu$ (mm <sup>-1</sup> )                    | 0.799                                          |
| F (000)                                      | 320.0                                          |
| No. of rflns. collected                      | 3034                                           |
| No. of indep. rflns. /Rint                   | 7734/0.0264                                    |
| No. of obsd. rflns. [ $I_0 > 2\sigma(I_0)$ ] | 3034                                           |
| Data / restraints / parameters               | 3034/ 0 /202                                   |
| $R_1 / wR2$ [ $I_0 > 2\sigma(I_0)$ ]         | 0.0523(2583)                                   |
| $R_1 / wR2$ (all data)                       | 0.1730(3034)                                   |
| GOF (on $F^2$ )                              | 1.092                                          |
| CCDC No.                                     | 2245959                                        |

## 8. Synthetic applications

Diacid product **2a'** can be efficiently converted to succinic anhydride **4a** with a 69% yield.<sup>4</sup> The reduction of **2a'** with LiAlH<sub>4</sub> gave product **5a**, which can be further converted into Phensuximide, an antispasmodic succinimide.<sup>5</sup> Additionally, oxidative cyclization of **2a'** produced phenylmaleic anhydride **6a** with an outstanding 99% yield.<sup>6</sup> **2a'** can also be efficiently transformed via an intramolecular Friedel–Crafts reaction to produce compound **7a**, which is a crucial intermediate to prepare novel analgesics.<sup>7</sup>

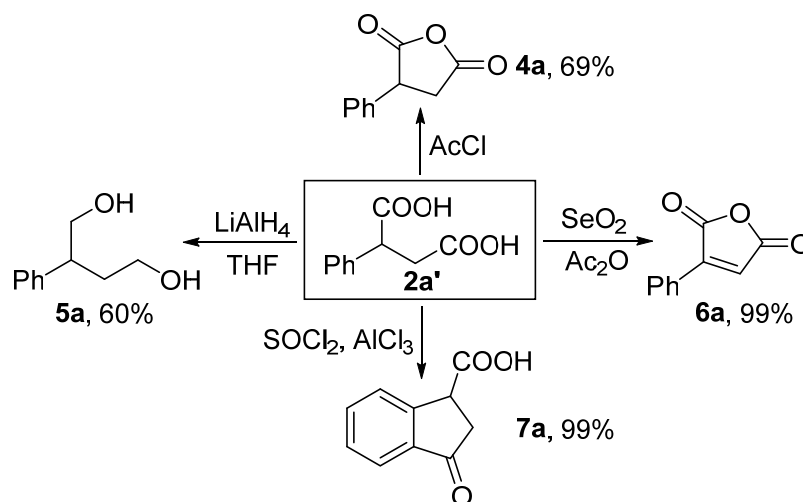

Figure S7. Synthetic applications of diacid products

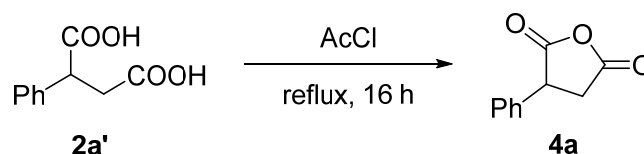

A 50 mL round-bottomed flask contained a stirring bar was charged with phenyl succinic acid **2a** (500 mg, 2.5 mmol). Freshly distilled acetyl chloride (5 mL) was added, the flask was fitted with a condenser and the reaction mixture was heated at reflux temperature (oil bath) under an argon atmosphere for 16 h. The solvents were removed under reduced pressure and the crude residue was purified by flash column chromatography (petroleum ether/ethyl acetate 7/1) to give desired product **4a**.

**3-Phenyldihydrofuran-2,5-dione (4a).**<sup>4</sup> White solid, 310 mg, 69% yield. <sup>1</sup>H NMR (400 MHz, Chloroform-*d*)  $\delta$  7.42 – 7.25 (m, 3H), 7.26 (d, *J* = 7.9 Hz, 2H), 4.34 (dd, *J* = 10.3, 6.5 Hz, 1H), 3.45 (ddd, *J* = 18.9, 10.3, 1.2 Hz, 1H), 3.10 (ddd, *J* = 19.0, 6.6, 1.3 Hz, 1H). <sup>13</sup>C NMR (101 MHz, Chloroform-*d*)  $\delta$  171.6, 169.5, 134.5, 129.4, 128.5, 127.2, 46.4, 36.5.

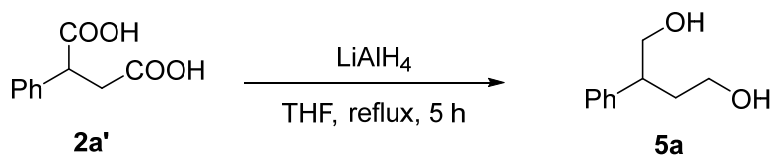

The **2a** (1.35 mmol) was dissolved in THF (5 mL) under argon and the reaction mixture was cooled to 0 °C. LiAlH<sub>4</sub> (4 mmol dissolved in 2 mL THF) was added dropwise with stirring. The mixture is heated to reflux for 4 h (oil bath) and cooled to 0 °C afterwards. The mixture was carefully quenched with water and extracted three times with ethyl acetate (3 × 20 mL). The combined extracts were washed with brine, and dried over anhydrous Na<sub>2</sub>SO<sub>4</sub>. The solvents were removed under reduced pressure and the crude residue was washed with cold Et<sub>2</sub>O to give the pure desired product.

**2-Phenylbutane-1,4-diol (5a).**<sup>8</sup> White solid, 134 mg, 60% yield. <sup>1</sup>H NMR (400 MHz, Chloroform-*d*) δ 7.28 (t, *J* = 7.5 Hz, 2H), 7.20 (d, *J* = 7.1 Hz, 1H), 7.16 (d, *J* = 7.7 Hz, 2H), 3.71 – 3.43 (m, 6H), 2.88 (p, *J* = 6.7 Hz, 1H), 1.99 (td, *J* = 14.0, 6.1 Hz, 1H), 1.81 (ddd, *J* = 13.9, 8.9, 4.5 Hz, 1H). <sup>13</sup>C NMR (101 MHz, Chloroform-*d*) δ 142.3, 128.5, 127.7, 126.6, 67.2, 60.6, 45.6, 35.6.

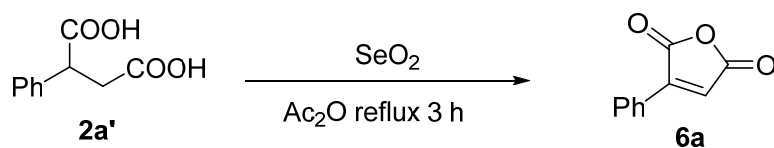

To a mechanically stirred slurry of selenium dioxide (400 mg, 3.6 mmol) in freshly distilled acetic anhydride (5 mL) was added phenyl succinic acid (450 mg, 2.4 mol), and this mixture was heated at reflux (oil bath) for 3 h, during which time it turned from yellow to black. While still hot, the mixture was filtered through a celite pad to remove precipitated selenium salts. Subsequent solvent evaporation afforded crude product. Recrystallization from EA-PE afforded **6a** as pale-yellow crystals.

**Phenylmaleic anhydride (6a).**<sup>9</sup> Pale-yellow crystals, 403 mg, 99% yield. <sup>1</sup>H NMR (400 MHz, Chloroform-*d*) δ 7.97 (d, *J* = 7.6 Hz, 2H), 7.53 (dt, *J* = 15.1, 7.4 Hz, 3H), 7.00 (s, 1H). <sup>13</sup>C NMR (101 MHz, Chloroform-*d*) δ 164.5, 163.6, 146.8, 132.7, 129.3, 128.9, 126.8, 124.4.

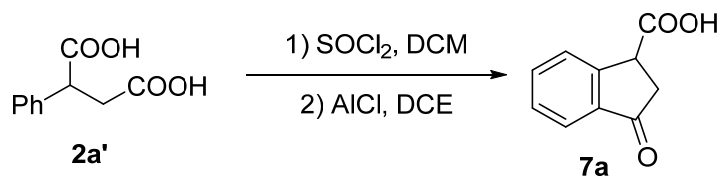

An oven-dried 50 mL three-neck bottle containing a condenser and a Teflon-coated stir bar was charged with 2-phenylsuccinic acid **2a** (0.49 g, 2.5 mmol). The reaction flask was then

sealed with rubber septum, charged with nitrogen gas. After adding 10 mL of dichloromethane (DCM) and thionyl chloride (0.3 mL, 4 mmol) sequentially, the temperature was raised to 75 °C (oil bath). Once the 2-phenylsuccinic acid **2a** was totally dissolved, the solvent was removed in vacuo using a Dean-Stark trap. Charged the reaction vessel with 10 mL of 1,2-dichloroethane (DCE) followed by adding 0.7 g (5 mmol) AlCl<sub>3</sub> partitively. Stirred the reaction mixture at room temperature for 13 h and raised the temperature to 60 °C for 4.5 h. The reaction was quenched with 6 M HCl (5 mL) and water (10 mL), extracted with AcOEt, then concentrated in vacuo. The residue was purified by silica gel flash chromatography (PE/AcOEt = 2:1) to give the pure desired product **7a**.

**3-Oxo-2,3-dihydro-1H-indene-1-carboxylic acid (7a).**<sup>10</sup> White solid, 441 mg, 99%. <sup>1</sup>H NMR (400 MHz, DMSO-*d*<sub>6</sub>) δ 7.73 (d, *J* = 4.7 Hz, 2H), 7.67 (d, *J* = 7.6 Hz, 1H), 7.51 (ddd, *J* = 7.9, 5.5, 2.2 Hz, 1H), 4.32 (t, *J* = 5.6 Hz, 1H), 2.87 (d, *J* = 4.9 Hz, 2H). <sup>13</sup>C NMR (101 MHz, DMSO-*d*<sub>6</sub>) δ 173.7, 172.5, 152.5, 136.3, 135.5, 129.0, 127.1, 123.5, 43.9, 21.4.



## 9. Mechanistic studies

### 9.1 Detection of products ratio over reaction time.

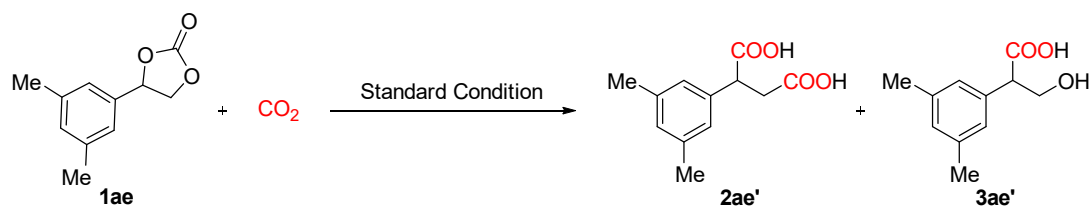

A 50 mL oven-dried electrochemical cell containing a stir bar was evacuated and back-filled under CO<sub>2</sub> flow for at least 3 times. **1ae** (0.3 mmol), TBABF<sub>4</sub> (0.3 mmol) and DMF (5 mL) were added to the cell and the cell was installed with a Pt cathode and Mg anode, and the cell was closed under CO<sub>2</sub> atmosphere. Then, the reaction mixture was electrolyzed under a constant current of 10 mA for 4 h. Take samples every half hour, carefully quenched with HCl (1M, 1 mL) and extracted with ethyl acetate. The solvents were removed under reduced pressure and the crude residue was detected by <sup>1</sup>H NMR.

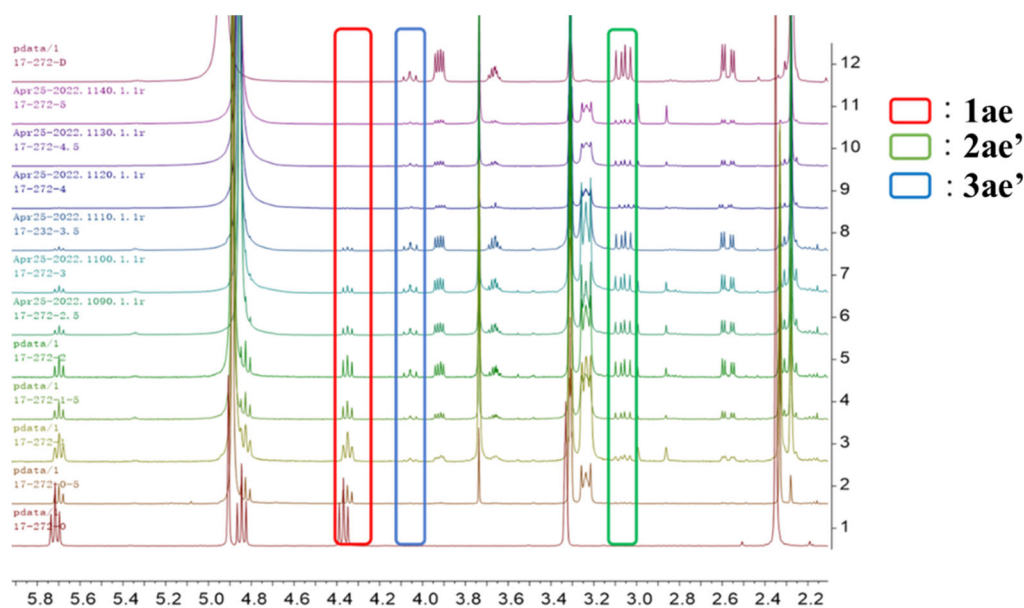

Figure S8. <sup>1</sup>H NMR spectrum of different times for reaction of **1ae**.

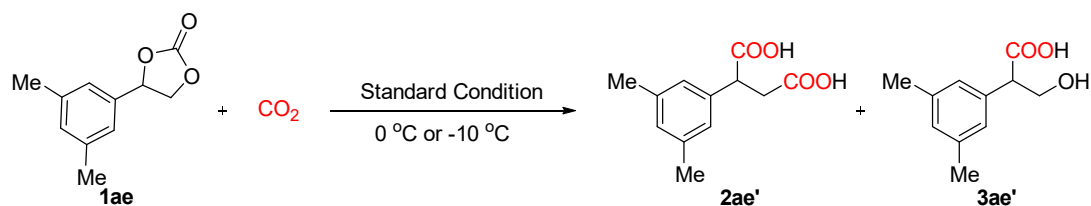

A 50 mL oven-dried electrochemical cell containing a stir bar was evacuated and back-filled under CO<sub>2</sub> flow for at least 3 times. **1ae** (0.3 mmol), TBABF<sub>4</sub> (0.3 mmol) and DMF (5

mL) were added to the cell and the cell was installed with a Pt cathode and Mg anode, and the cell was closed under CO<sub>2</sub> atmosphere. Then, the reaction mixture was electrolyzed under a constant current of 10 mA for 4 h under different temperature. After the reaction finished, the reaction was carefully quenched with HCl (1M, 1 mL) and extracted with ethyl acetate. The solvents were removed under reduced pressure and the crude residue was detected by <sup>1</sup>H NMR.

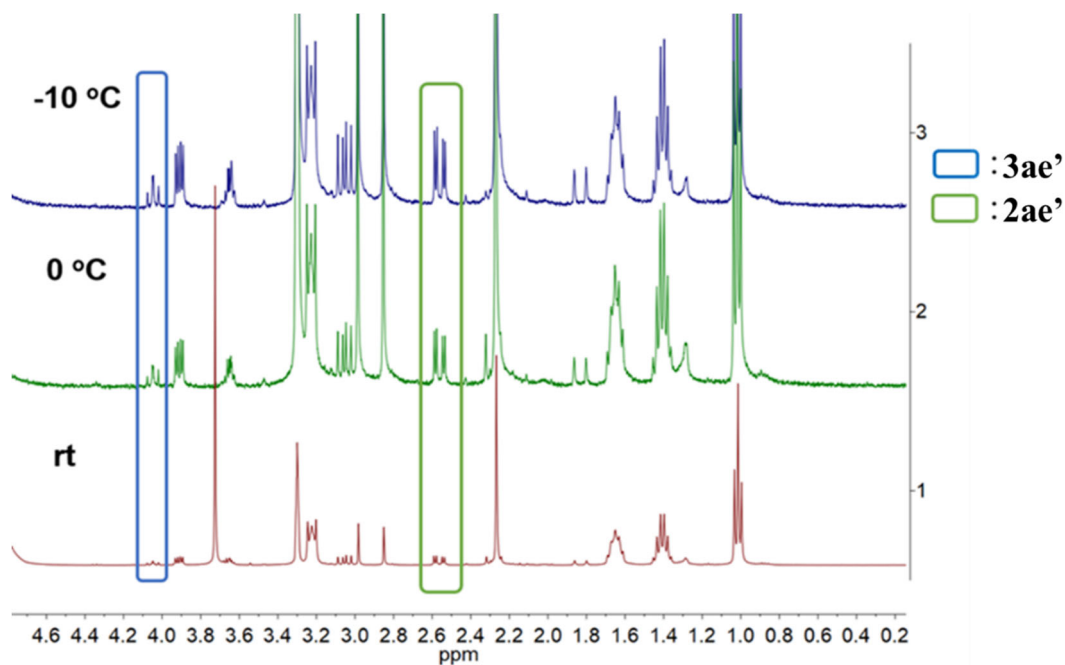

**Figure S9.** <sup>1</sup>H NMR spectrum of different temperature for reaction of **1ae**.

## 9.2 Cyclic voltammetry studies

Cyclic voltammograms were recorded with a CHI760E potentiostat at room temperature (20 °C) in DMF. TBABF<sub>4</sub> was used as the supporting electrolyte, and a Glass Carbon electrode (d = 3 mm) was used as the working electrode. The auxiliary electrode was a Pt sheet (10 mm × 10mm × 0.3 mm). All potentials are referenced against the Ag/AgCl redox couple. The scan rate is 100 mV s<sup>-1</sup>. The solution was purged with Ar flow for 5 minutes before the measurement. Polishing of Glass Carbon electrode can be accomplished by putting a few drops of water/1.0-micron alumina slurry onto a polishing pad. The electrode is polished using a figure 8 motion to avoid grooving the electrode. Once the electrode has been polished, it should be rinsed with water, then sonicated in acetone, ethanol or distilled water for few mins to remove any residual particulate matter if present.

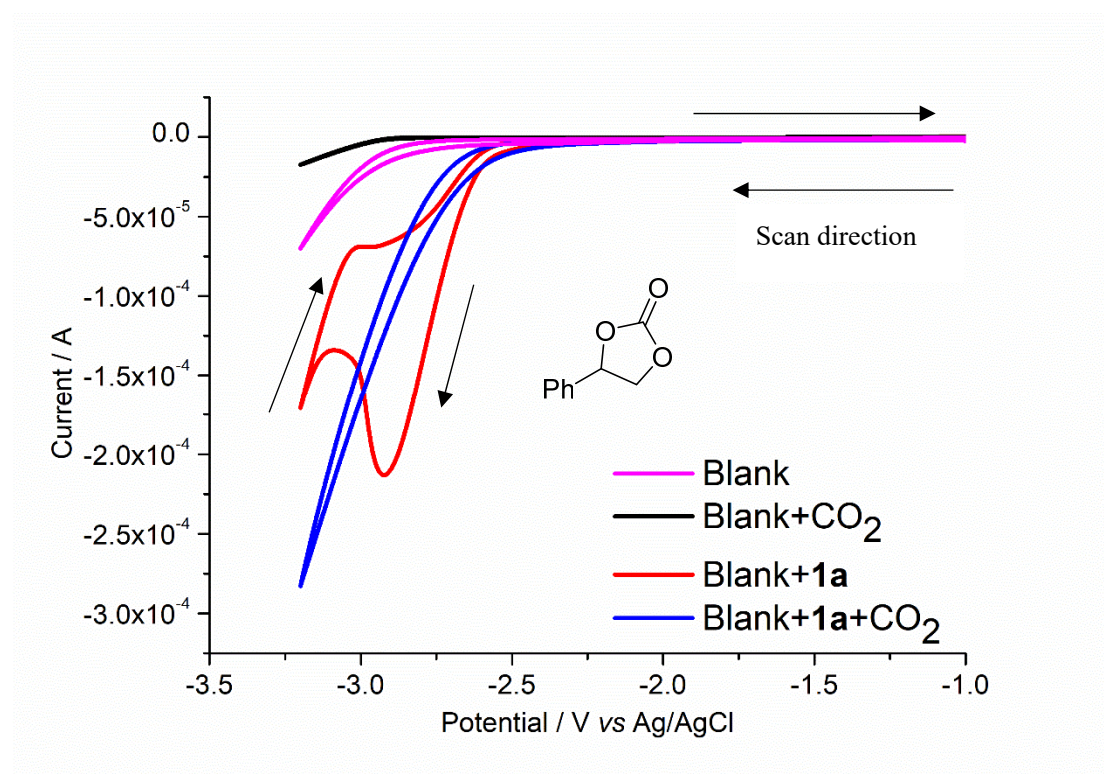

**Figure S10.** Cyclic voltammograms recorded on a Glass Carbon electrode (d = 3 mm). TBABF<sub>4</sub> (0.3 mmol), DMF (5 mL), **1a** (0.3 mmol). (maintaining IUPAC convention)

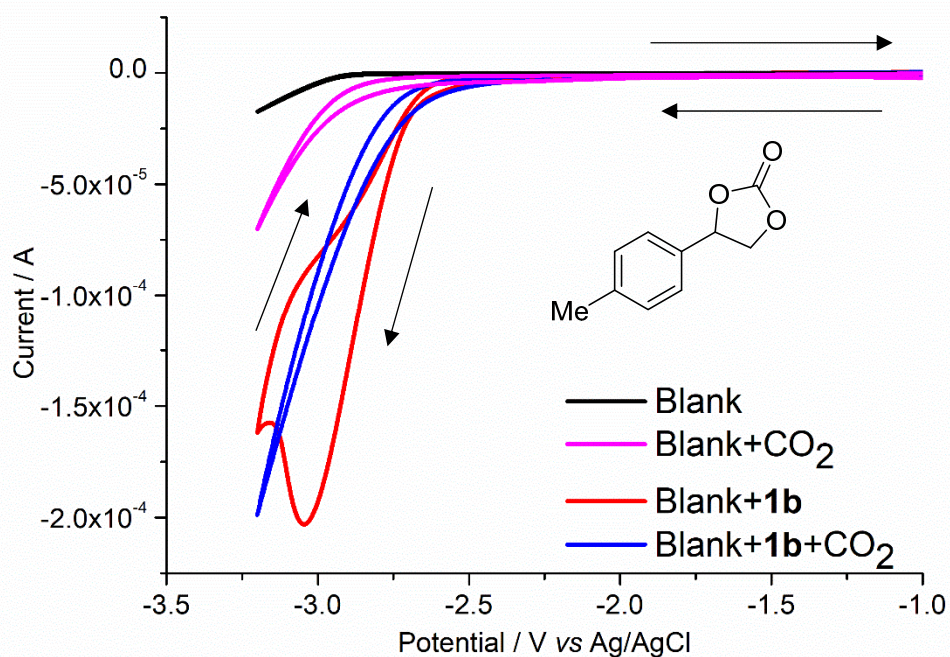

**Figure S11.** Cyclic voltammograms recorded on a Glass Carbon electrode ( $d = 3$  mm). TBABF<sub>4</sub> (0.3 mmol), DMF (5 mL), **1b** (0.3 mmol). (maintaining IUPAC convention)

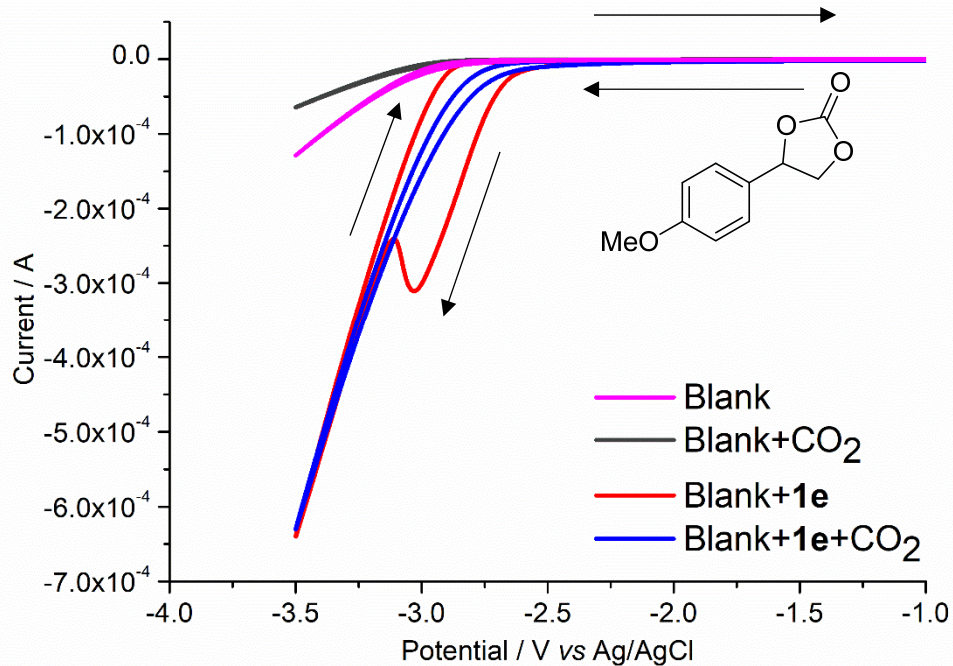

**Figure S12.** Cyclic voltammograms recorded on a Glass Carbon electrode ( $d = 3$  mm). TBABF<sub>4</sub> (0.3 mmol), DMF (5 mL), **1e** (0.3 mmol). (maintaining IUPAC convention)

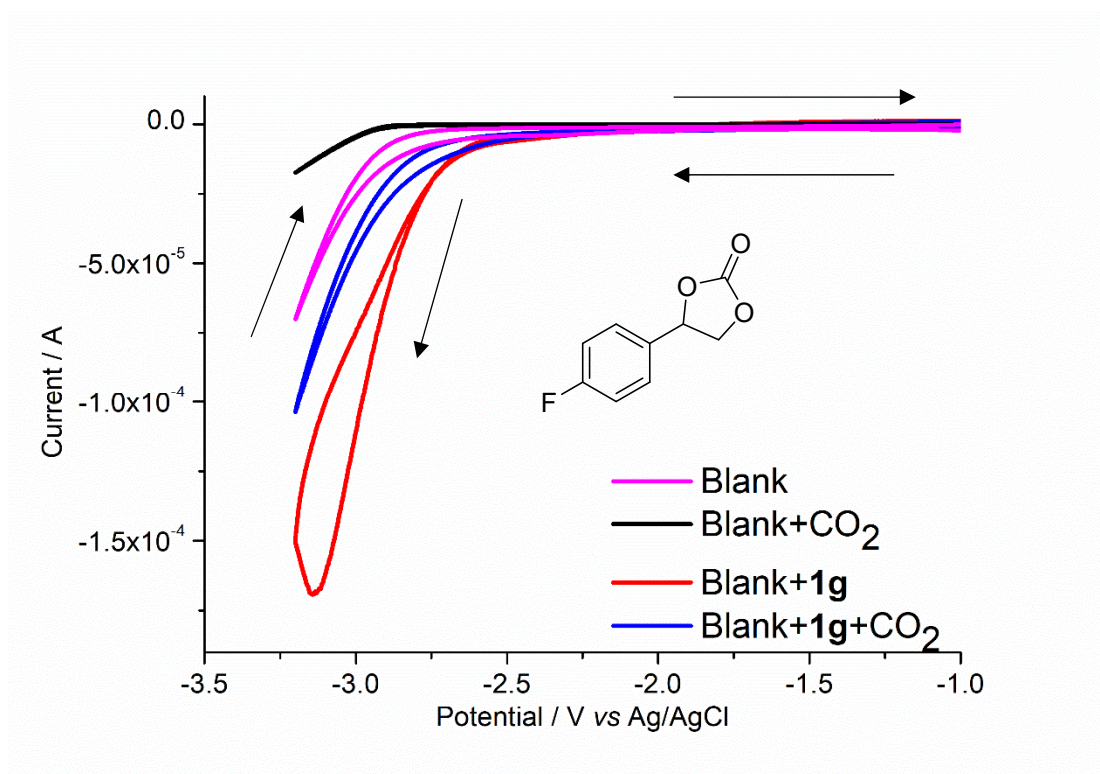

**Figure S13.** Cyclic voltammograms recorded on a Glass Carbon electrode (d = 3 mm). TBABF<sub>4</sub> (0.3 mmol), DMF (5 mL), **1g** (0.3 mmol). (maintaining IUPAC convention)

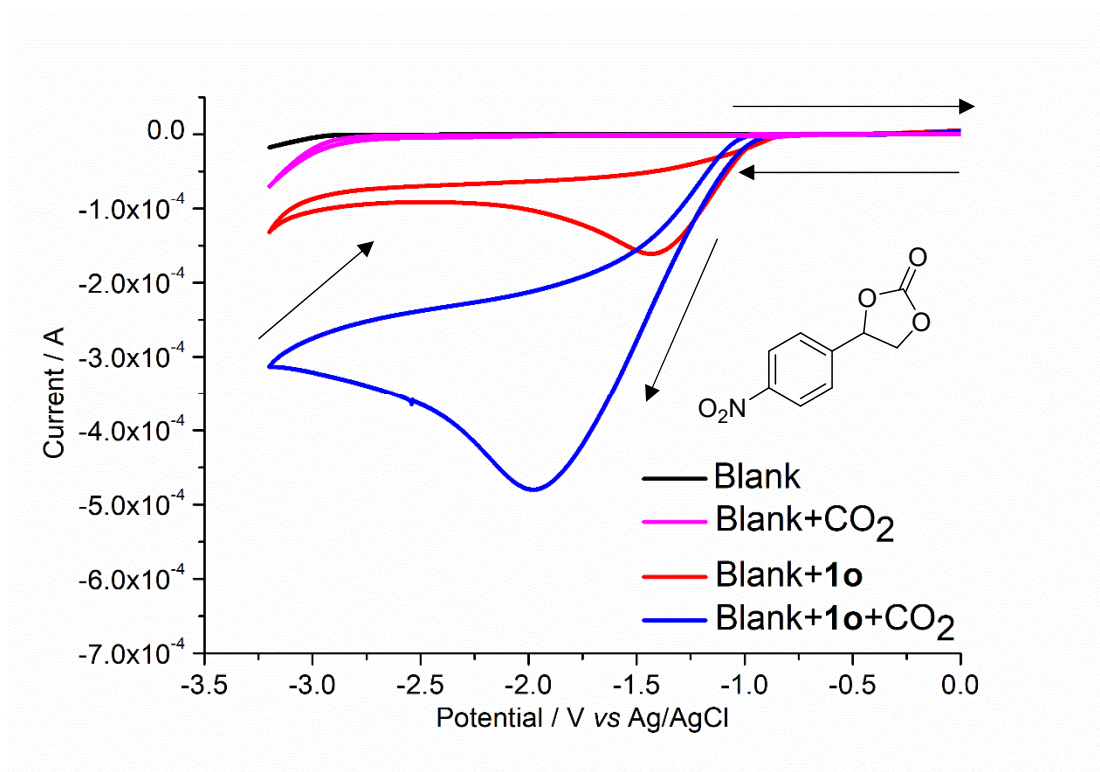

**Figure S14.** Cyclic voltammograms recorded on a Glass Carbon electrode (d = 3 mm). TBABF<sub>4</sub> (0.3 mmol), DMF (5 mL), **1o** (0.3 mmol). (maintaining IUPAC convention)

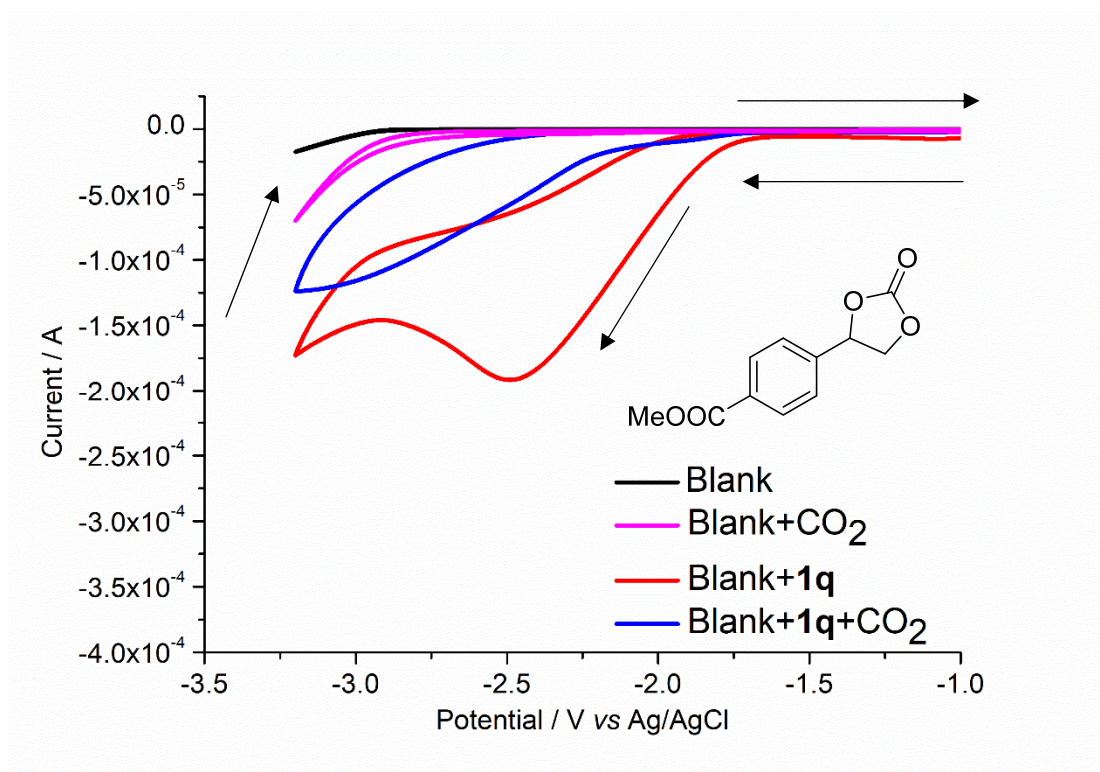

**Figure S15.** Cyclic voltammograms recorded on a Glass Carbon electrode (d = 3 mm). TBABF<sub>4</sub> (0.3 mmol), DMF (5 mL), **1q** (0.3 mmol). (maintaining IUPAC convention)

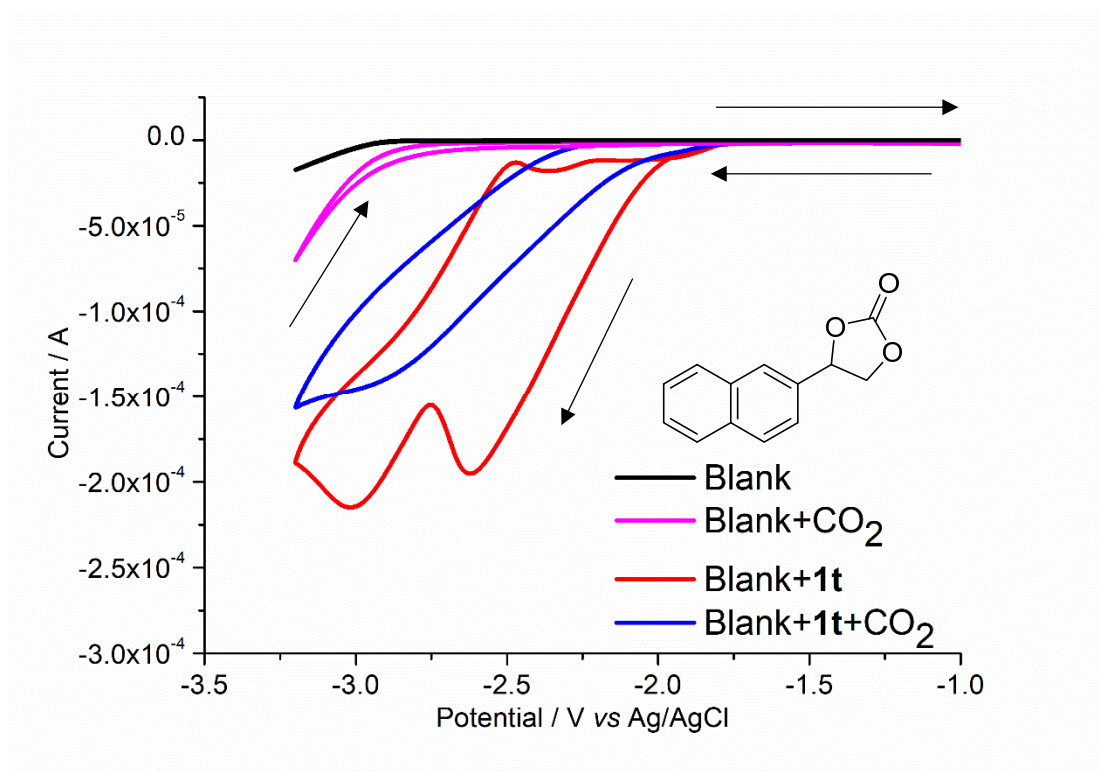

**Figure S16.** Cyclic voltammograms recorded on a Glass Carbon electrode (d = 3 mm). TBABF<sub>4</sub> (0.3 mmol), DMF (5 mL), **1t** (0.3 mmol). (maintaining IUPAC convention)

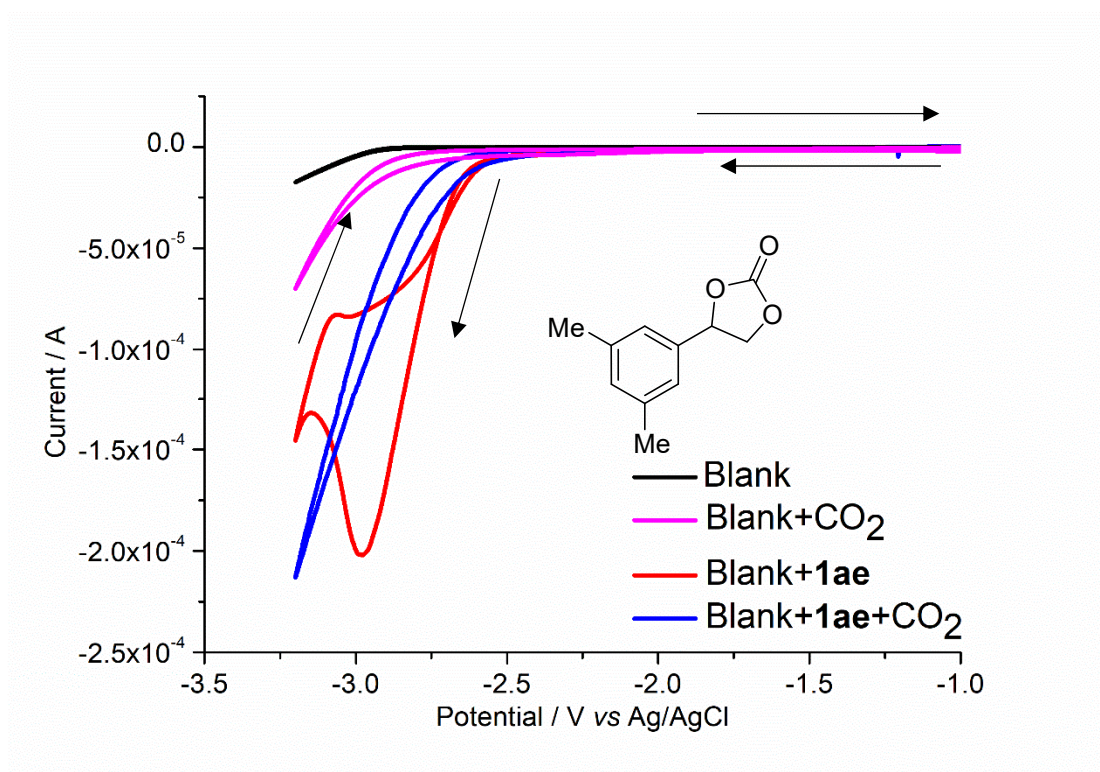

**Figure S17.** Cyclic voltammograms recorded on a Glass Carbon electrode (d = 3 mm). TBABF<sub>4</sub> (0.3 mmol), DMF (5 mL), **1ae** (0.3 mmol). (maintaining IUPAC convention)

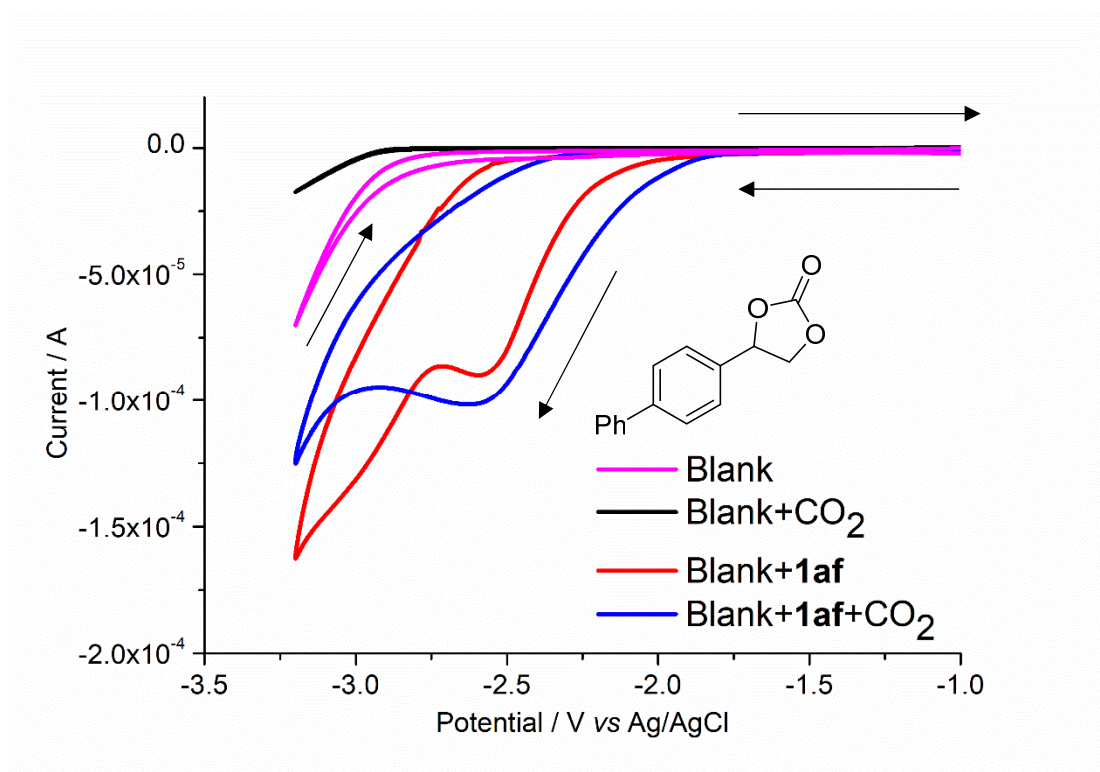

**Figure S18.** Cyclic voltammograms recorded on a Glass Carbon electrode (d = 3 mm). TBABF<sub>4</sub> (0.3 mmol), DMF (5 mL), **1af** (0.3 mmol). (maintaining IUPAC convention)

### 9.3 $^{13}\text{CO}_2$ isotope labeling experiment

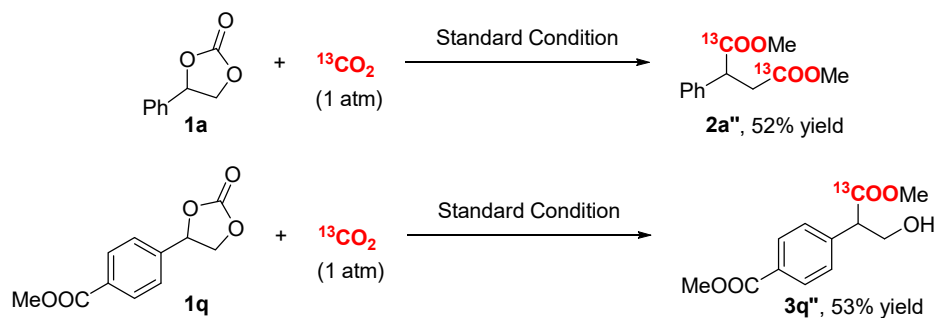

A 50 mL oven-dried electrochemical cell containing a stir bar was evacuated and back-filled under Ar flow for at least 3 times. Cyclic carbonate (0.3 mmol), TBABF<sub>4</sub> (0.3 mmol) and DMF (5 mL) were added to the cell and the cell was installed with a Pt cathode and Mg anode, and the cell was closed under Ar atmosphere. Then, the cell was evacuated and back-filled under  $^{13}\text{CO}_2$ . The reaction mixture was electrolyzed under a constant current of 10 mA for 6 h. The reaction mixture was carefully quenched with HCl (1M, 10 mL) and extracted three times with ethyl acetate (3 × 20 mL). The combined organic layers were washed with brine (2 × 50 mL) and dried over Na<sub>2</sub>SO<sub>4</sub>. The solvents were removed under reduced pressure and the residue was methylated at 0°C with TMSCHN<sub>2</sub> (2 M in hexane, 0.6 mL) in 2 mL of ether/methanol (1:1 v/v) solvent. The crude residue was purified by flash column chromatography (petroleum ether/ethyl acetate 7/1 to 3/1) to give desired product.

The calculation for incorporation rates of  $^{13}\text{C}$  by mass spectrometry

The theoretical value for the unlabelled product **2a** and  $^{13}\text{C}$  labeled product **2a''**

|   | m/z      | Abund (% largest) | Abund (% sum) | Abund (% first) |   | m/z      | Abund (% largest) | Abund (% sum) | Abund (% first) |
|---|----------|-------------------|---------------|-----------------|---|----------|-------------------|---------------|-----------------|
| ▶ | 245.0784 | 100               | 86.9          | 100             | ▶ | 246.0818 | 100               | 87.84         | 100             |
|   | 246.0818 | 13.29             | 11.55         | 13.29           |   | 247.0852 | 12.21             | 10.73         | 12.21           |
|   | 247.0839 | 1.64              | 1.42          | 1.64            |   | 248.0872 | 1.5               | 1.32          | 1.5             |
|   | 248.0866 | 0.14              | 0.12          | 0.14            |   | 249.0899 | 0.12              | 0.11          | 0.12            |
|   | 249.089  | 0.01              | 0.01          | 0.01            |   | 250.0922 | 0.01              | 0.01          | 0.01            |
|   | 250.0915 | 0                 | 0             | 0               |   | 251.0947 | 0                 | 0             | 0               |

|   | m/z      | Abund (% largest) | Abund (% sum) | Abund (% first) |
|---|----------|-------------------|---------------|-----------------|
| ▶ | 247.0851 | 100               | 88.79         | 100             |
|   | 248.0885 | 11.13             | 9.88          | 11.13           |
|   | 249.0904 | 1.38              | 1.23          | 1.38            |
|   | 250.0932 | 0.11              | 0.1           | 0.11            |
|   | 251.0955 | 0.01              | 0.01          | 0.01            |
|   | 252.0979 | 0                 | 0             | 0               |

The measured spectrum for **2a''**



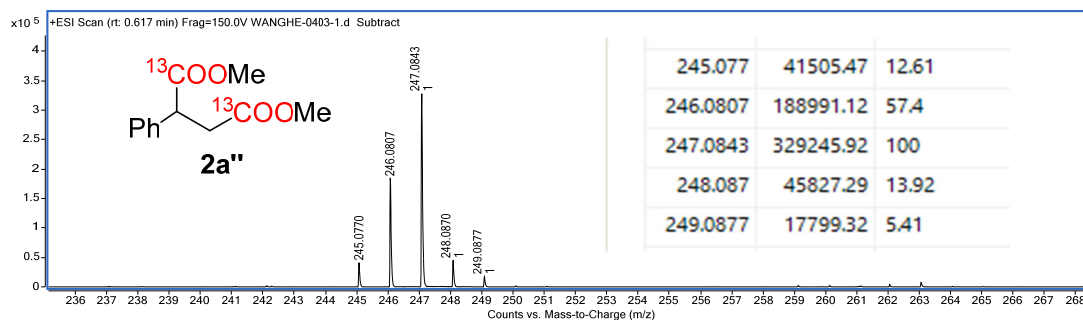

The theoretical value for the unlabelled product **3q** and <sup>13</sup>C labeled product **3q''**

| m/z      | Abund (% largest) | Abund (% sum) | Abund (% first) |
|----------|-------------------|---------------|-----------------|
| 261.0733 | 100               | 86.69         | 100             |
| 262.0767 | 13.33             | 11.56         | 13.33           |
| 263.0787 | 1.85              | 1.6           | 1.85            |
| 264.0815 | 0.17              | 0.14          | 0.17            |
| 265.0837 | 0.01              | 0.01          | 0.01            |
| 266.0862 | 0                 | 0             | 0               |

| m/z      | Abund (% largest) | Abund (% sum) | Abund (% first) |
|----------|-------------------|---------------|-----------------|
| 262.0767 | 100               | 87.62         | 100             |
| 263.0801 | 12.25             | 10.73         | 12.25           |
| 264.082  | 1.71              | 1.5           | 1.71            |
| 265.0848 | 0.15              | 0.13          | 0.15            |
| 266.087  | 0.01              | 0.01          | 0.01            |
| 267.0895 | 0                 | 0             | 0               |

The measured spectrum for **3q''**

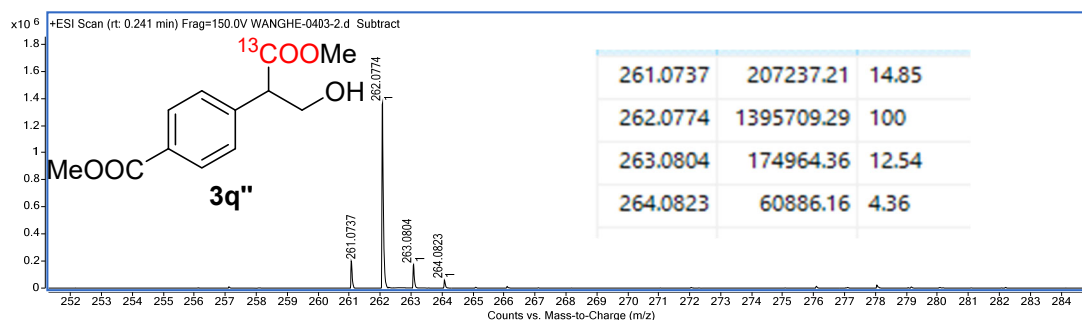

We use **3q''** as an example to calculate the <sup>13</sup>C labeling ratio. The method is as follows: According to the table, it is observed that the monoisotopic peak (A) of the unlabelled product has an *m/z* of 261.0733, while the A+1 peak has an *m/z* of 262.0767. The ratio of the monoisotopic peak to its A+1 peak is 100/13.33, indicating when the monoisotopic peak has an abundance of 100, the contribution of its A+1 peak is 13.33. In our measured spectrum, the relative height of the unlabelled monoisotopic peak A is observed to be 14.85. Therefore, the contribution of its A+1 peak is calculated as 14.85 \* 13.33 / 100 = 1.975. Consequently, the contribution of the <sup>13</sup>C-labelled compound to the A+1 peak is 100 - 1.975 = 98.025. Thus, the <sup>13</sup>C incorporation ratio is estimated to be approximately 98.025 / (98.025 + 14.85) = 87%. To verify the accuracy of our calculation method, we applied the same method to deduce the experimental spectrum data. According to the table, when the relative abundance of the monoisotopic peak A of the <sup>13</sup>C-labeled product is 100, its contribution to the A+1 peak is 12.54. In the measured spectrum, the relative abundance of the monoisotopic peak labeled with <sup>13</sup>C is

98.025. Therefore, the contribution of its A+1 peak is calculated as  $98.025 * 12.54 / 100 = 12.29$ . This calculated value is close to the measured value, indicating the feasibility of this method. Applying the same method, for the **2a''** peak, the proportion of singly labeled isotopes is approximately 35%, while the proportion of doubly labeled isotopes is approximately 58%.

## 9.4 Stereochemical study

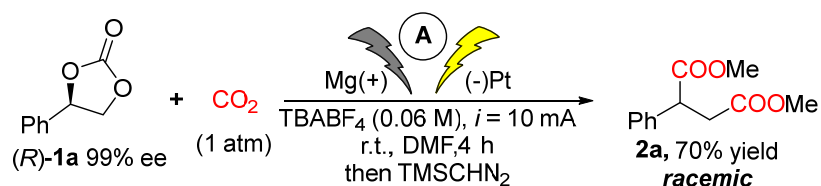

A 50 mL oven-dried electrochemical cell containing a stir bar was evacuated and back-filled under  $\text{CO}_2$  flow for at least 3 times. *(R)*-**1a** (0.3 mmol),  $\text{TBABF}_4$  (0.3 mmol) and DMF (5 mL) were added to the cell and the cell was installed with a Pt cathode and Mg anode and the cell was closed under  $\text{CO}_2$  atmosphere. Then, the reaction mixture was electrolyzed under a constant current of 10 mA for 4 h. Then the mixture was carefully quenched with HCl (1 M, 10 mL) and extracted three times with ethyl acetate ( $3 \times 20$  mL). The combined extracts were washed with brine ( $2 \times 50$  mL) and dried over  $\text{Na}_2\text{SO}_4$ . The solvents were removed under reduced pressure and the crude residue was dissolved in THF (1 mL) and methanol (1 mL) under Ar.  $\text{TMSCHN}_2$  (0.6 mL, 2 M in Hexane) was added dropwise at 0 °C for 0.5 h. The mixture was quenched with water, extracted with ethyl acetate and dried over  $\text{Na}_2\text{SO}_4$ . The solvents were removed under reduced pressure and the crude residue was purified by prepared TLC. CHIRALPAK OD-H, 25 °C, *i*PrOH-hexanes 10.0/90.0, 0.5 mL/min, 220 nm.  $t_R = 38.6$  min,  $t_S = 46.8$  min. Chiral HPLC: CHIRALPAK OD-H, 25 °C, *i*PrOH-hexanes 5.0/95.0, 0.25 mL/min, 220 nm.  $t_R = 38.6$  min,  $t_S = 52.1$  min.

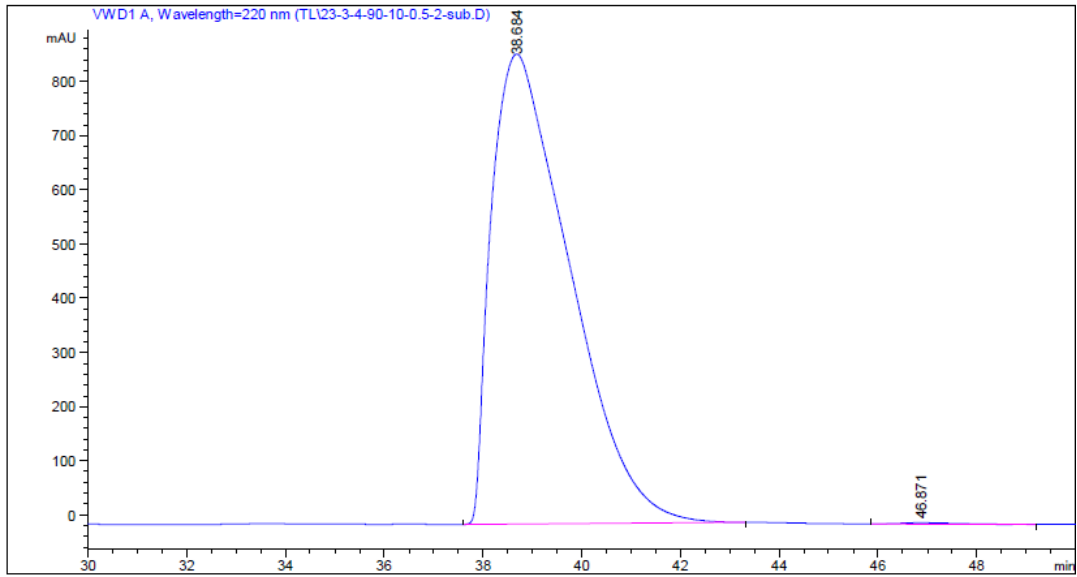

=====  
 Area Percent Report  
 =====

Sorted by : Signal  
 Multiplier : 1.0000  
 Dilution : 1.0000  
 Used multiplier & dilution factor

Signal 1: VWD1 A, Wavelength=220 nm

| Peak # | RetTime [min] | Type | Width [min] | Area [mAU*s] | Height [mAU] | Area %  |
|--------|---------------|------|-------------|--------------|--------------|---------|
| 1      | 38.684        | BB   | 1.6166      | 9.56472e4    | 867.31287    | 99.7739 |
| 2      | 46.871        | BB   | 1.0908      | 216.77664    | 2.51446      | 0.2261  |

**Figure S19. HPLC of (R)-1a**

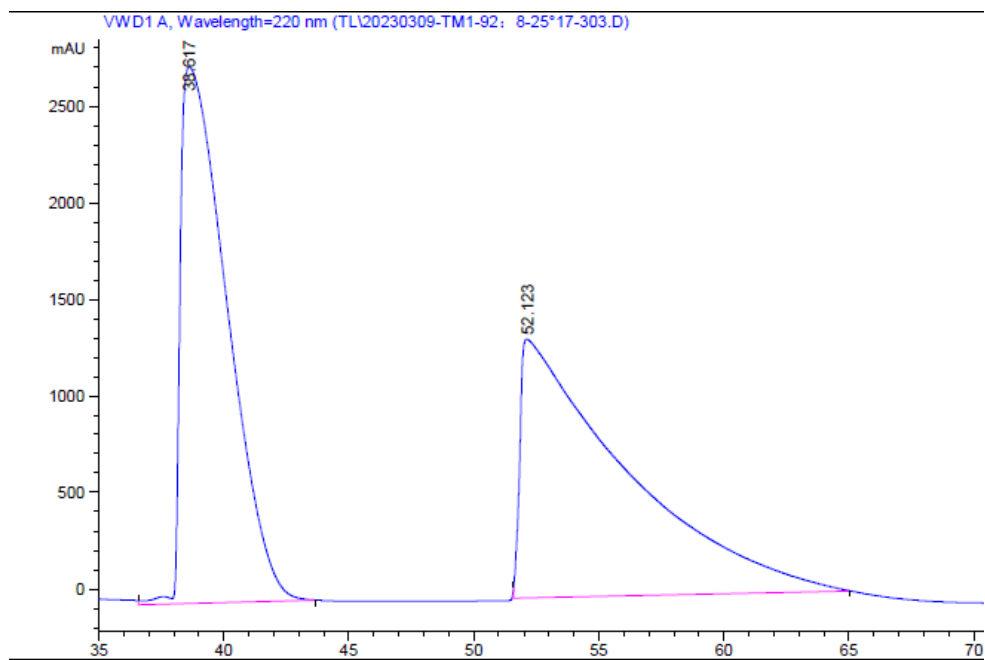

=====  
 Area Percent Report  
 =====

Sorted by : Signal  
 Multiplier : 1.0000  
 Dilution : 1.0000  
 Used multiplier & dilution factor

Signal 1: VWD1 A, Wavelength=220 nm

| Peak # | RetTime [min] | Type | Width [min] | Area [mAU*s] | Height [mAU] | Area %  |
|--------|---------------|------|-------------|--------------|--------------|---------|
| 1      | 38.617        | MM   | 2.1612      | 3.60265e5    | 2778.25269   | 48.0222 |
| 2      | 52.123        | MM   | 4.8539      | 3.89939e5    | 1338.91602   | 51.9778 |

**Figure S20. HPLC of racemic 2a**

## 9.5 Formation of CO<sub>2</sub> radical anion.

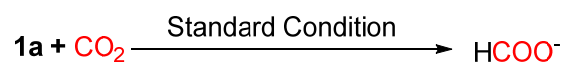

A 50 mL oven-dried electrochemical cell containing a stir bar was evacuated and back-filled under CO<sub>2</sub> flow for at least 3 times. **1a** (0.3 mmol), TBABF<sub>4</sub> (0.3 mmol) and DMF (5 mL) were added to the cell and the cell was installed with a Ni(foam) cathode and Mg anode. The reaction mixture was electrolyzed under a constant current of 10 mA for 4 h. After concentrating in vacuo carefully, 2 mL D<sub>2</sub>O was added to make the mixture dissolved sufficiently, the HCOO<sup>-</sup> was detected by NMR. Therefore, the CO<sub>2</sub> radical anion might be generated through CO<sub>2</sub> reduction on cathode

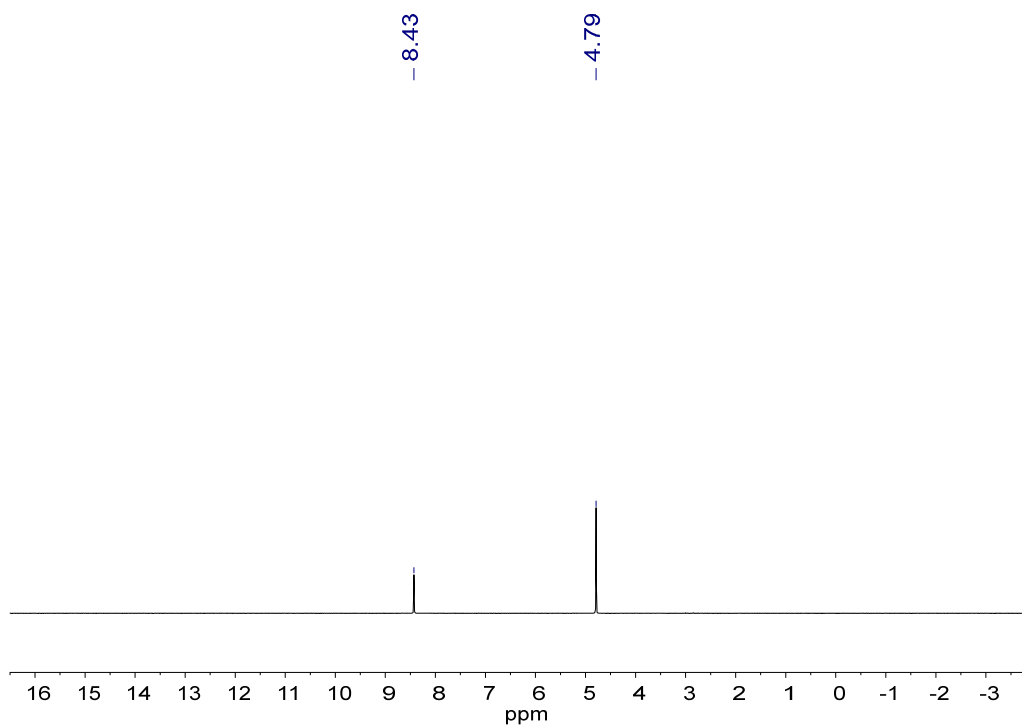

**<sup>1</sup>H NMR spectrum (400 MHz, Deuterium Oxide) of HCOOMg**

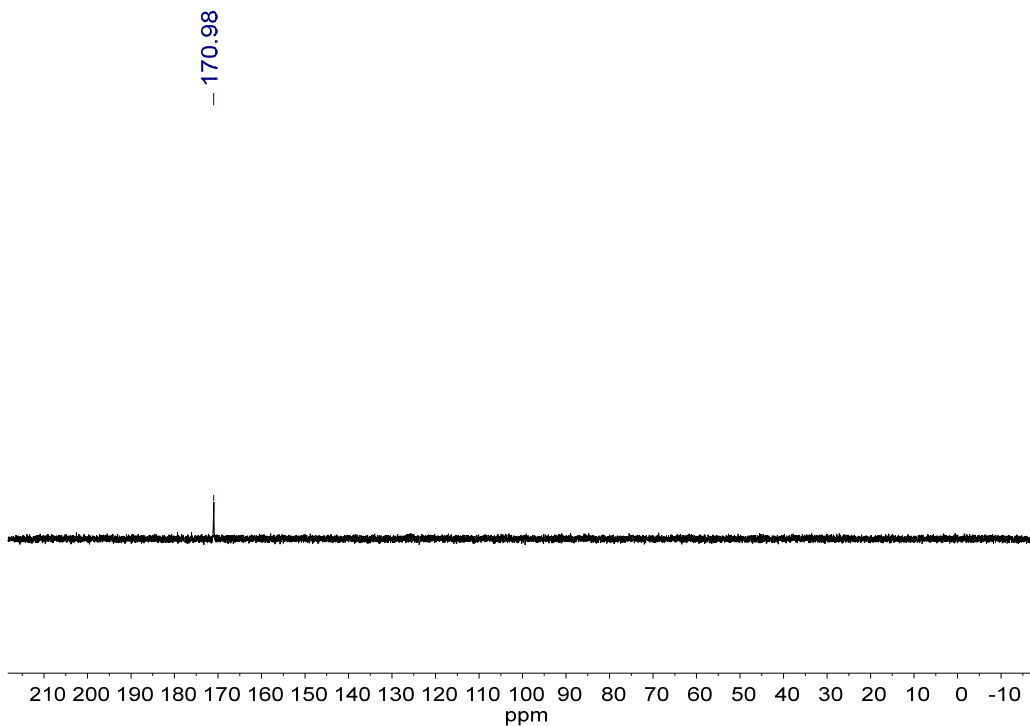

$^{13}\text{C}$  NMR spectrum (101 MHz, Deuterium Oxide) of HCOOMg

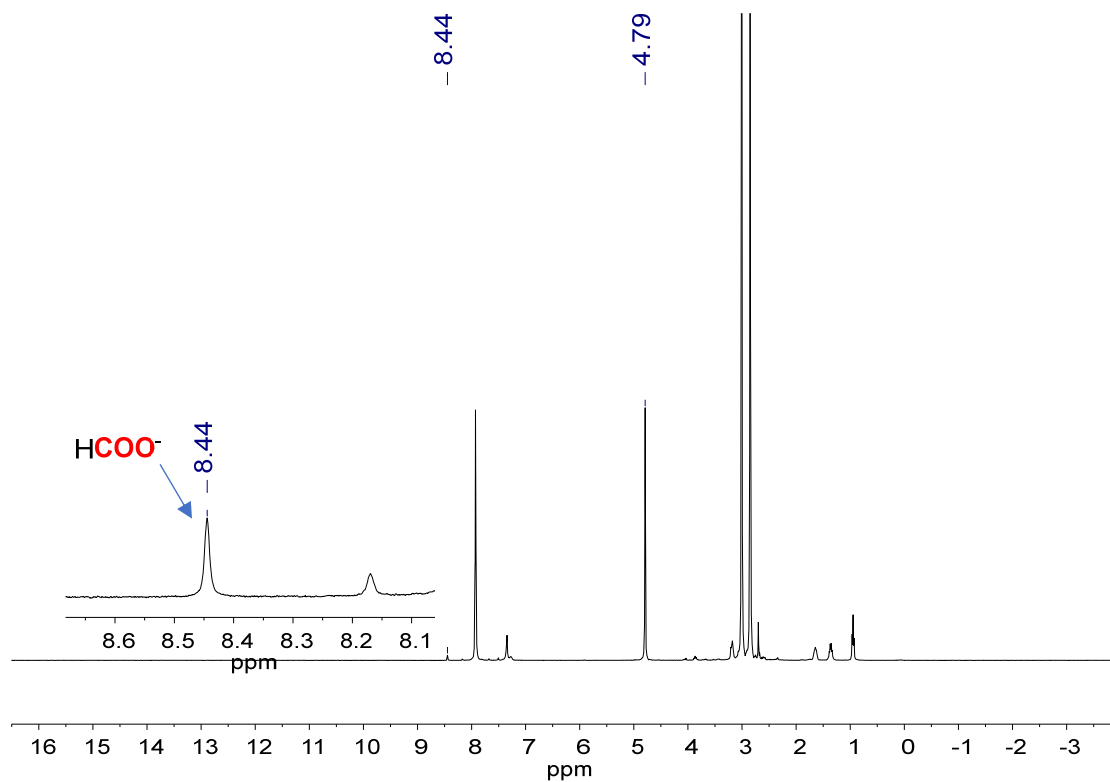

$^1\text{H}$  NMR spectrum (400 MHz, Deuterium Oxide) of  $\text{HCOO}^-$

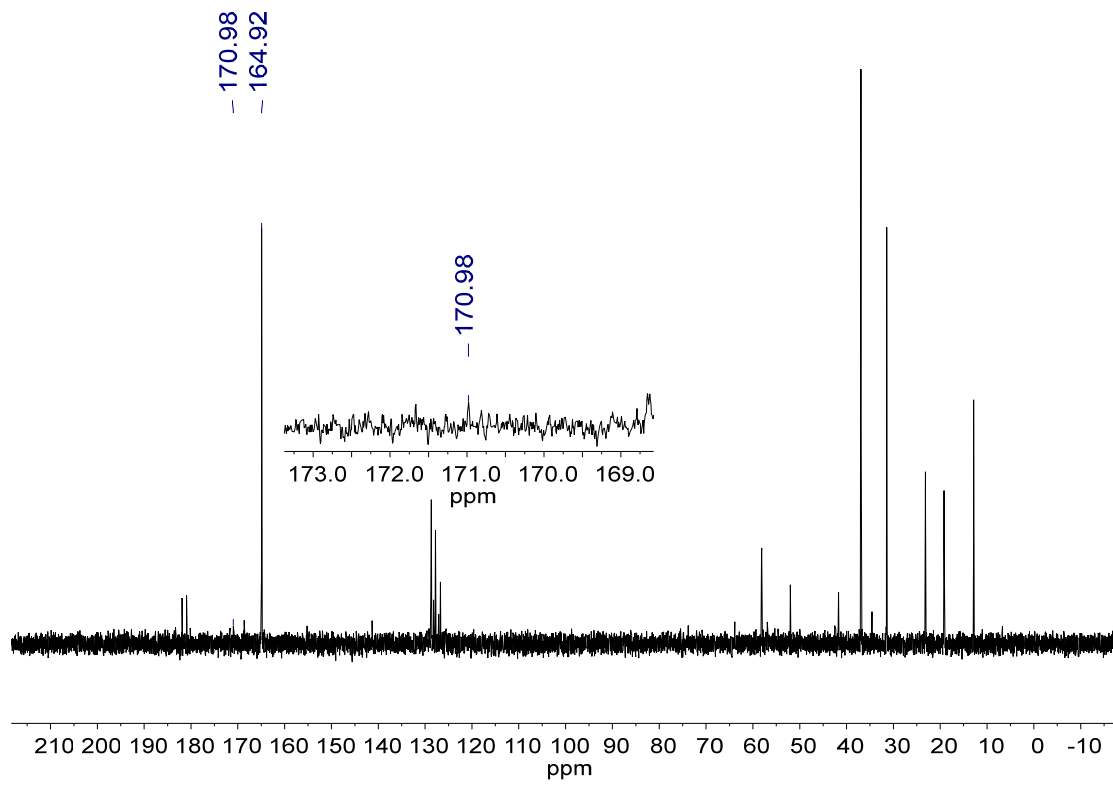

$^{13}\text{C}$  NMR spectrum (101 MHz, Deuterium Oxide) of  $\text{HCOO}^-$



## 9.6 Control experiments

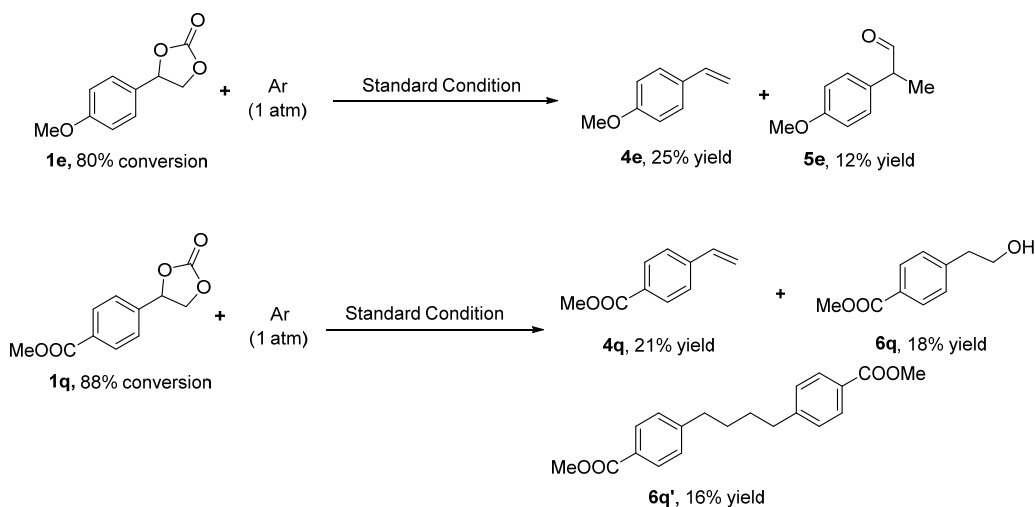

A 50 mL oven-dried electrochemical cell containing a stir bar was evacuated and back-filled under Ar flow for at least 3 times. Cyclic carbonate (0.3 mmol), TBABF<sub>4</sub> (0.3 mmol), and DMF (5 mL) were added to the cell and the cell was installed with a Pt cathode and Mg anode and closed under Ar atmosphere. Then, the reaction mixture was electrolyzed under a constant current of 10 mA for 4 h. The mixture was carefully quenched with HCl (1M, 10 mL) and extracted three times with ethyl acetate (3 × 20 mL). The combined extracts were washed with brine (2 × 50 mL) and dried over Na<sub>2</sub>SO<sub>4</sub>. The residue was methylated at 0 °C with TMSCHN<sub>2</sub> (2 M in hexane, 0.6 mL) in 2 mL of ether/methanol (1:1 v/v) solvent. Finally, the corresponding methylation product was purified by column chromatography (10:1-3:1 v/v petroleum ether/ethyl acetate). (For the reaction under Ar atmosphere, **4e**, white solid, 10 mg, 25% yield. **5e**, white solid, 6 mg, 12% yield. **4q**, white solid, 10 mg, 21% yield, **6q**, white solid, 10 mg, 18% yield, **6q'**, white solid, 18 mg, 16% yield.)

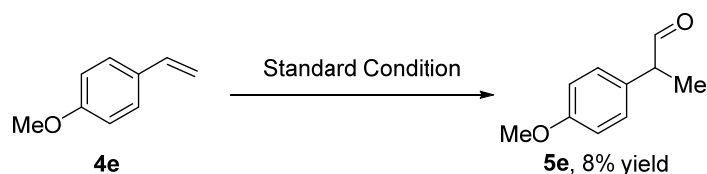

A 50 mL oven-dried electrochemical cell containing a stir bar was evacuated and back-filled under Ar flow for at least 3 times. **4e** (0.3 mmol), TBABF<sub>4</sub> (0.3 mmol), and DMF (5 mL) were added to the cell and the cell was installed with a Pt cathode and Mg anode and closed under Ar atmosphere. Then, the reaction mixture was electrolyzed under a constant current of 10 mA for 4 h. The mixture was quenched with water (10 mL) and extracted three times with ethyl acetate (3 × 20 mL). The combined extracts were washed with brine (2 × 50 mL) and dried over Na<sub>2</sub>SO<sub>4</sub>. The solvents were removed under reduced pressure and the crude residue

was purified by flash column chromatography (10:1 v/v petroleum ether/ethyl acetate) to get desired product **5e**.

**2-(4-Methoxyphenyl) propanal (5e)**. White solid, 3.9 mg, 8% yield.  $^1\text{H NMR}$  (400 MHz, Chloroform-*d*)  $\delta$  9.65 (d,  $J = 1.4$  Hz, 1H), 7.13 (d,  $J = 8.6$  Hz, 1H), 6.92 (d,  $J = 8.6$  Hz, 1H), 3.81 (s, 2H), 3.58 (dd,  $J = 7.1, 1.4$  Hz, 0H), 1.42 (d,  $J = 7.0$  Hz, 2H).  $^{13}\text{C NMR}$  (126 MHz, Chloroform-*d*)  $\delta$  201.0, 159.1, 129.6, 129.3, 114.5, 55.3, 52.1, 14.6. **HRMS** (ESI-TOF)  $m/z$ :  $[\text{M}+\text{Na}]^+$  Calcd for  $\text{C}_{10}\text{H}_{12}\text{NaO}_2$  187.0735; Found 187.0734.

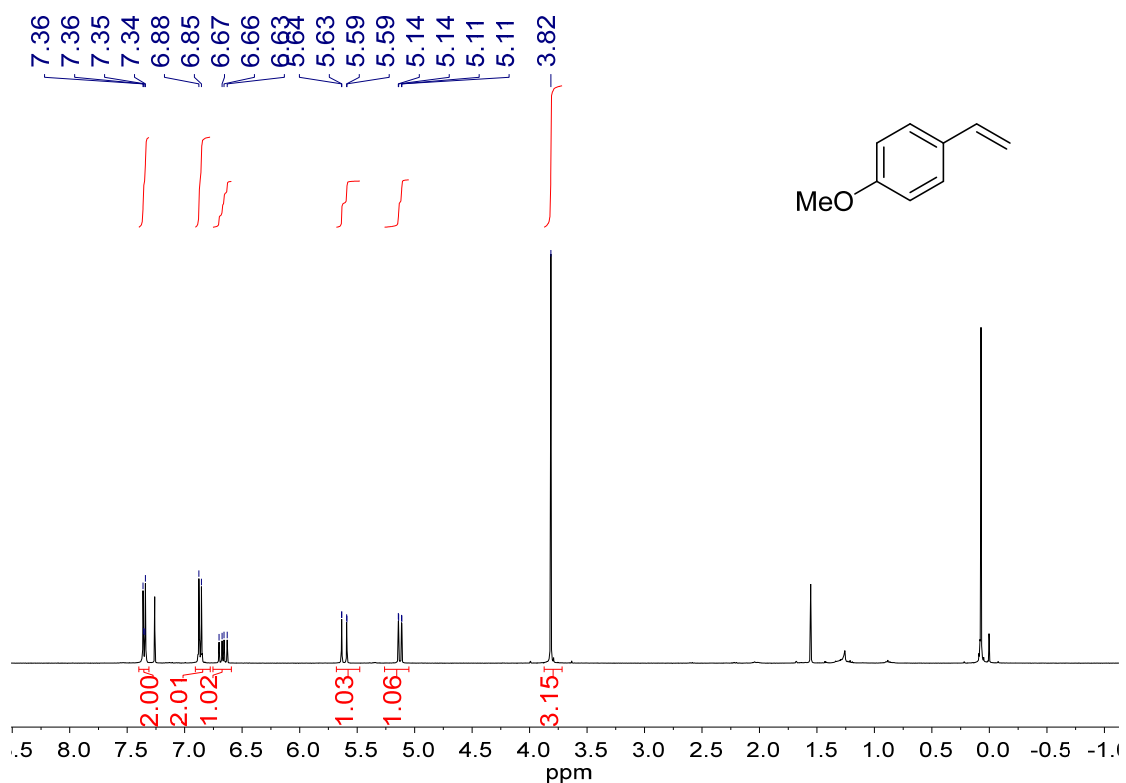

$^1\text{H NMR}$  spectrum (400 MHz, Chloroform-*d*) of **4e**

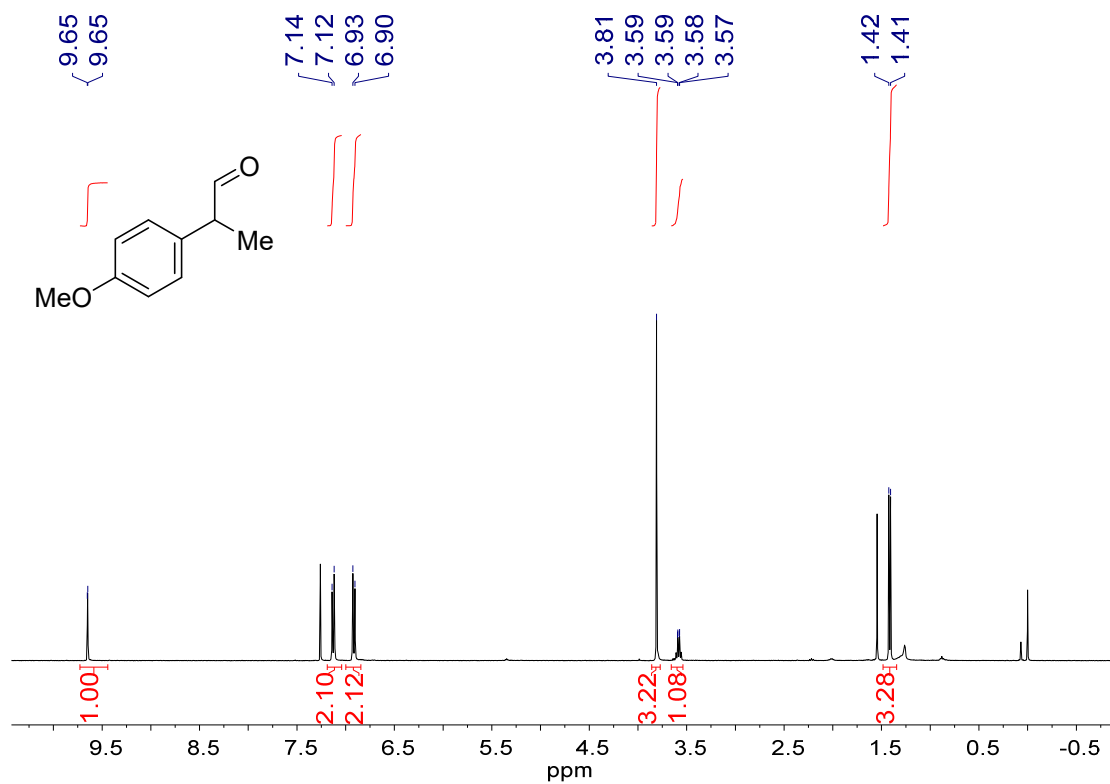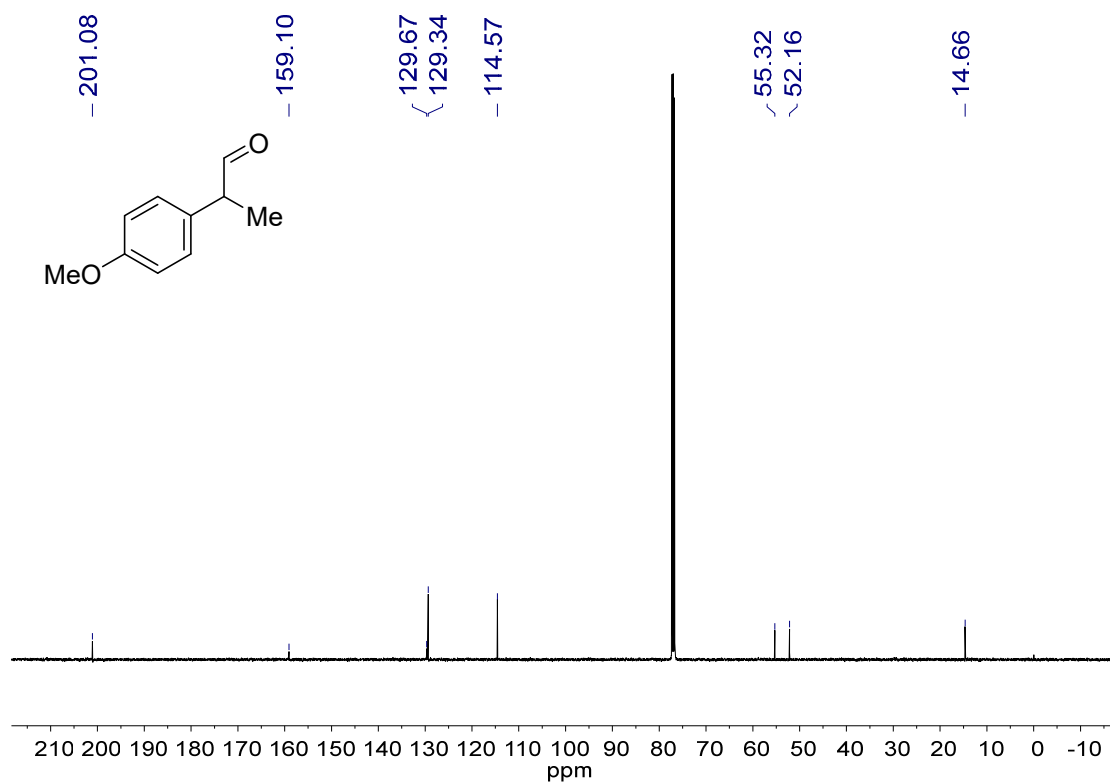

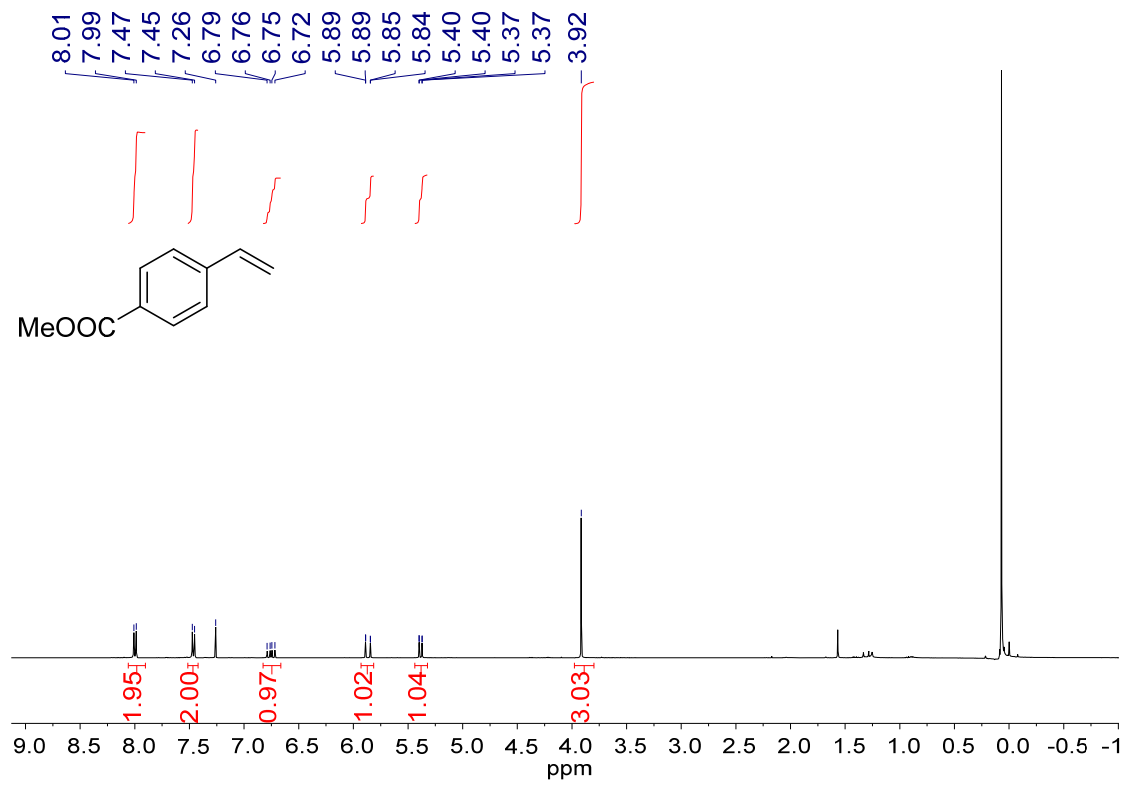

<sup>1</sup>H NMR spectrum (400 MHz, Chloroform-*d*) of 4q

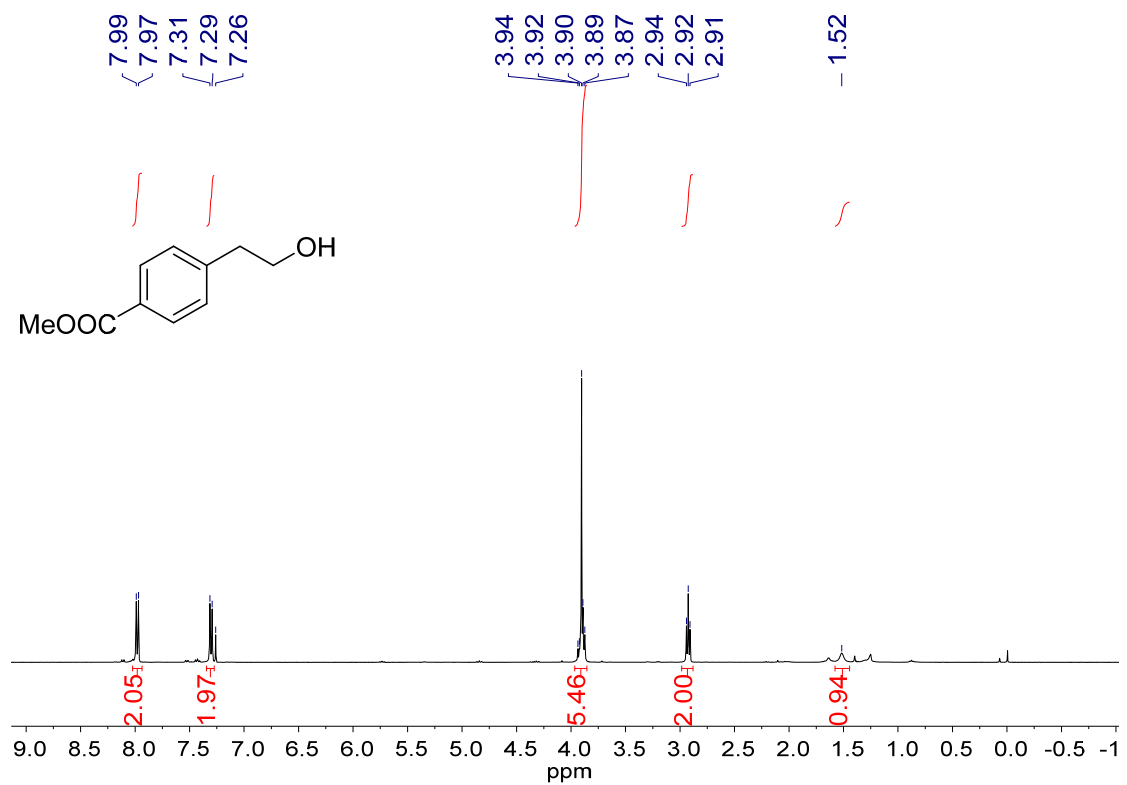

<sup>1</sup>H NMR spectrum (400 MHz, Chloroform-*d*) of 6q

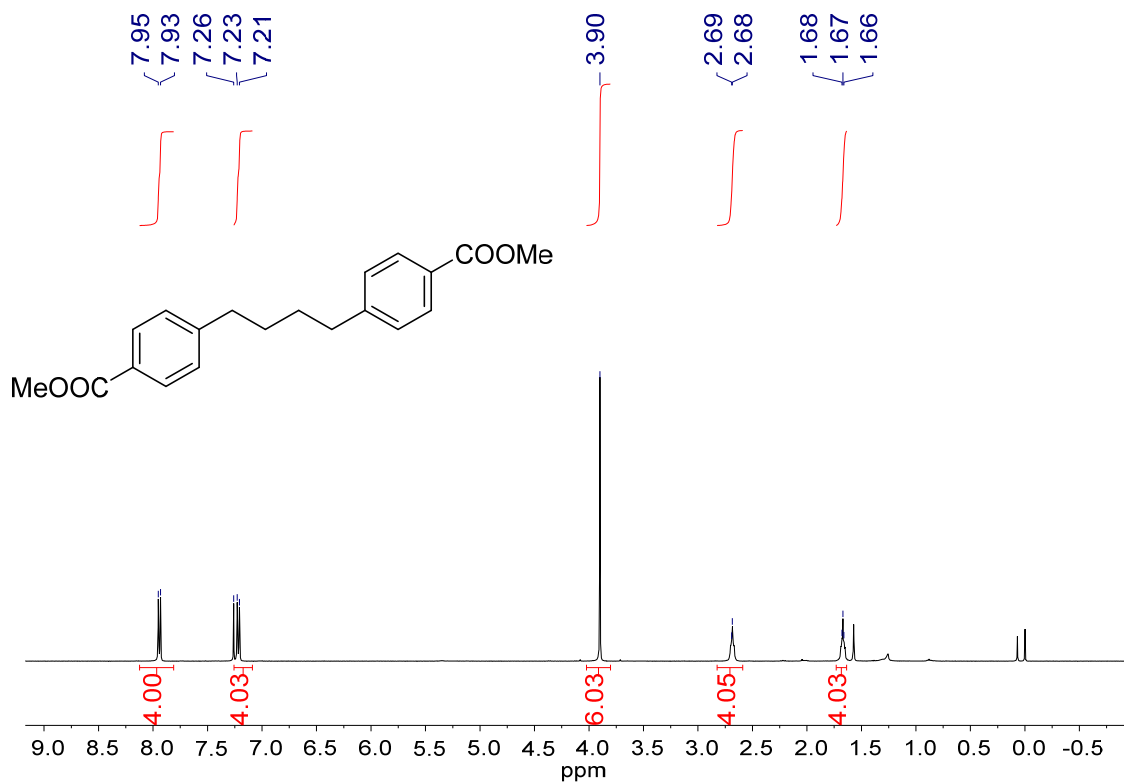

<sup>1</sup>H NMR spectrum (400 MHz, Chloroform-*d*) of 6q'

## 9.7 Radical trap experiment

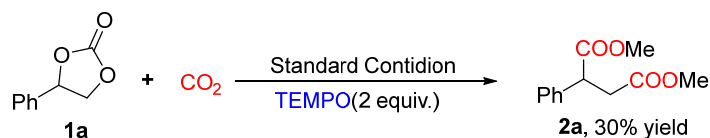

A 50 mL oven-dried electrochemical cell containing a stir bar was evacuated and back-filled under  $\text{CO}_2$  flow for at least 3 times. **1a** (0.3 mmol),  $\text{TBABF}_4$  (0.3 mmol), TEMPO (0.6 mmol) and DMF (5 mL) were added to the cell and the cell was installed with a Ni cathode and Mg anode and the cell was closed under  $\text{CO}_2$  atmosphere. Then, the reaction mixture was electrolyzed under a constant current of 10 mA for 4 h. Then the mixture was carefully quenched with HCl (1M, 10 mL) and extracted three times with ethyl acetate ( $3 \times 20$  mL). The combined extracts were washed with brine ( $2 \times 50$  mL) and dried over  $\text{Na}_2\text{SO}_4$ . The residue was methylated at  $0^\circ\text{C}$  with  $\text{TMSCHN}_2$  (2 M in hexane, 0.6 mL) in 2 mL of ether/methanol (1:1 v/v) solvent. Finally, the corresponding methylation product was purified by column chromatography (10:1-3:1 v/v petroleum ether/ethyl acetate).

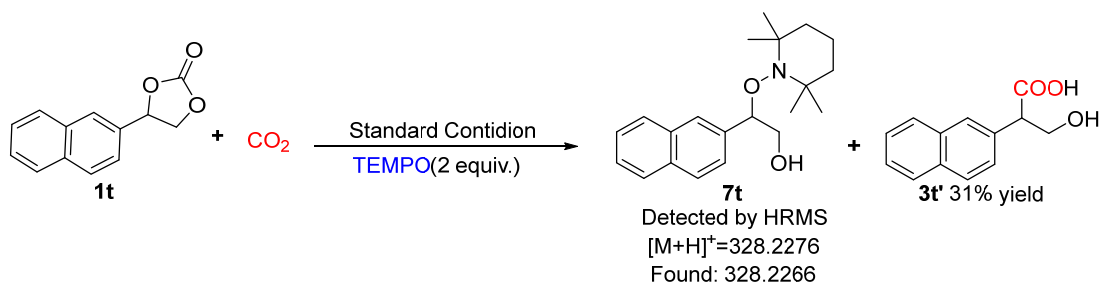

A 50 mL oven-dried electrochemical cell containing a stir bar was evacuated and back-filled under  $\text{CO}_2$  flow for at least 3 times. **1t** (0.3 mmol),  $\text{TBABF}_4$  (0.3 mmol), TEMPO (0.6 mmol) and DMF (5 mL) were added to the cell and the cell was installed with a Ni cathode and Mg anode and the cell was closed under  $\text{CO}_2$  atmosphere. Then, the reaction mixture was electrolyzed under a constant current of 10 mA for 4 h. Then the mixture was carefully quenched with HCl (1M, 10 mL) and extracted three times with ethyl acetate ( $3 \times 20$  mL). The combined extracts were washed with brine ( $2 \times 50$  mL) and dried over  $\text{Na}_2\text{SO}_4$ . The solvents were removed under reduced pressure and the crude residue was purified by flash column chromatography (petroleum ether/ethyl acetate/AcOH 10/1/0-3/1/0-3/2/0.005) to achieve the product **3t'**, white solid, 20 mg, 31% yield. The corresponding TEMPO-adduct **7t** was trace and detected by HRMS.

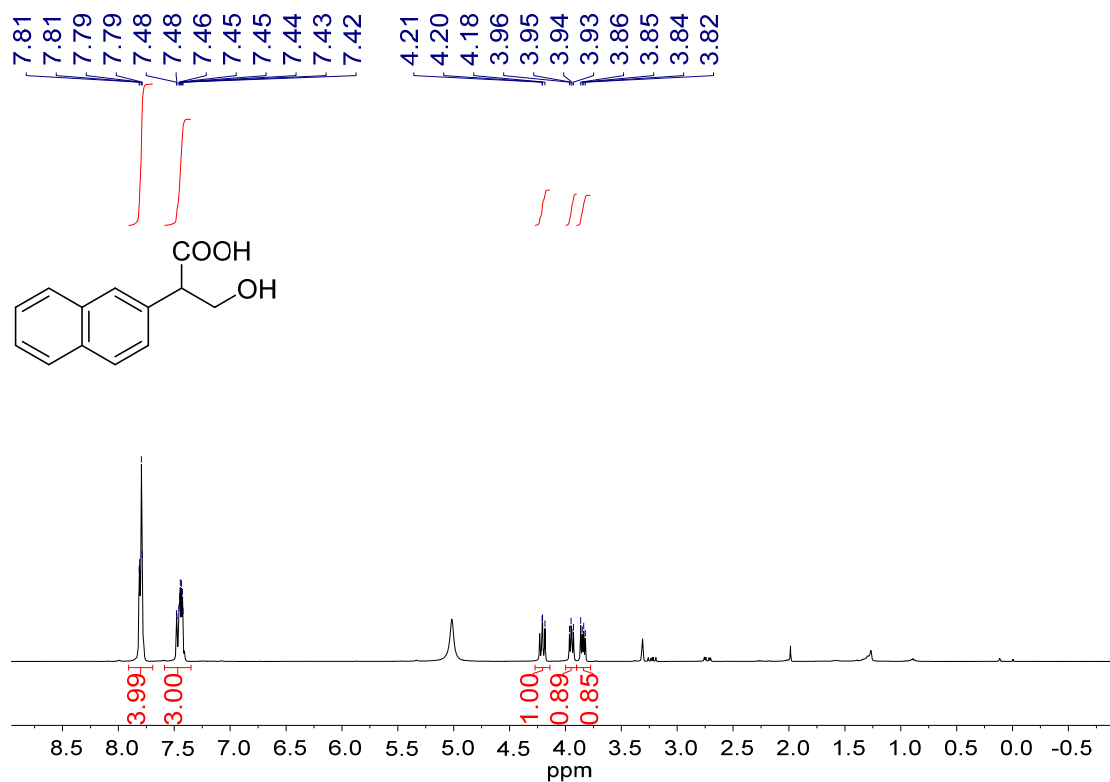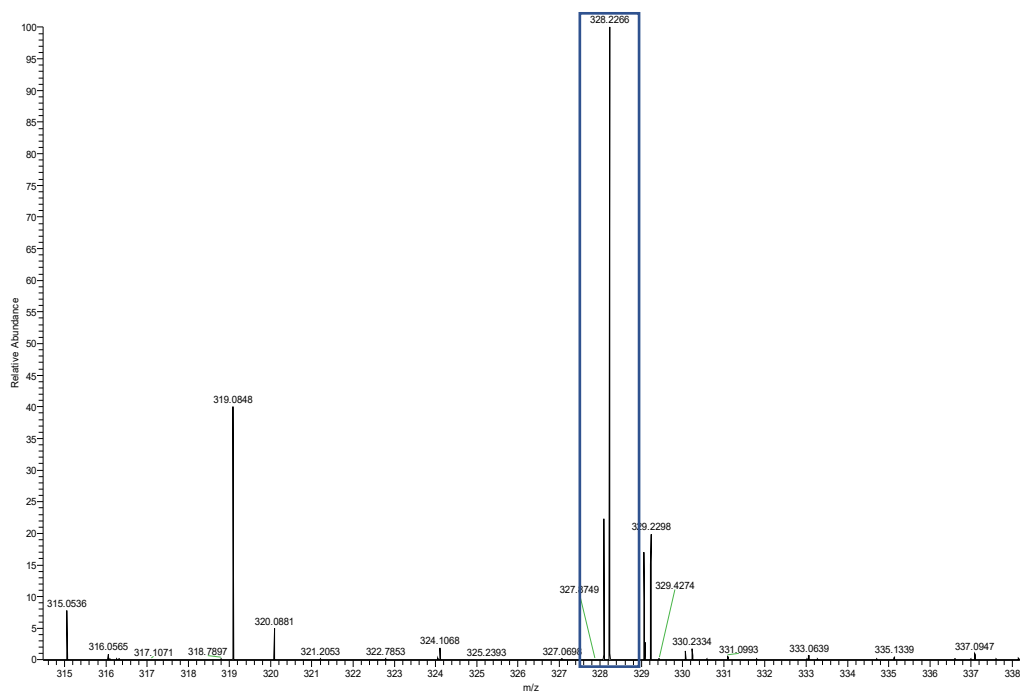

Figure S21. HRMS of 7t

## 9.8 Deuteration experiment

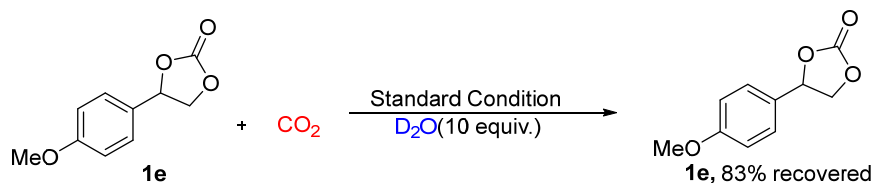

A 50 mL oven-dried electrochemical cell containing a stir bar was evacuated and back-filled under  $\text{CO}_2$  for at least 3 times. **1e** (0.3 mmol),  $\text{TBABF}_4$  (0.3 mmol),  $\text{D}_2\text{O}$  (3 mmol) and DMF (5 mL) were added to the cell and the cell was installed with a Pt cathode and Mg anode and the cell was closed under  $\text{CO}_2$  atmosphere. Then, the reaction mixture was electrolyzed under a constant current of 10 mA for 4 h. Only 17% **1e** was converted.

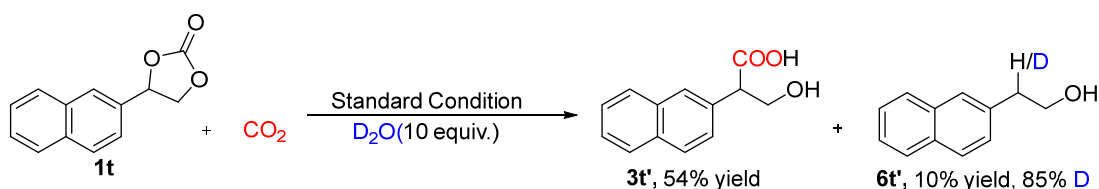

A 50 mL oven-dried electrochemical cell containing a stir bar was evacuated and back-filled under  $\text{CO}_2$  for at least 3 times. **1t** (0.3 mmol),  $\text{TBABF}_4$  (0.3 mmol),  $\text{D}_2\text{O}$  (3 mmol) and DMF (5 mL) were added to the cell and the cell was installed with a Pt cathode and Mg anode and the cell was closed under  $\text{CO}_2$  atmosphere. Then, the reaction mixture was electrolyzed under a constant current of 10 mA for 4 h. Then the mixture was carefully quenched with HCl (1M, 10 mL) and extracted three times with ethyl acetate ( $3 \times 20$  mL). The combined extracts were washed with brine ( $2 \times 50$  mL) and dried over  $\text{Na}_2\text{SO}_4$ . The solvents were removed under reduced pressure and the crude residue was purified by flash column chromatography (petroleum ether/ethyl acetate/AcOH 2/1/0-3/2/0.005) to give product **3t'** as white solid (40 mg, 60% yield) and **6t'** as white solid (5mg, 10% yield, 85% D).



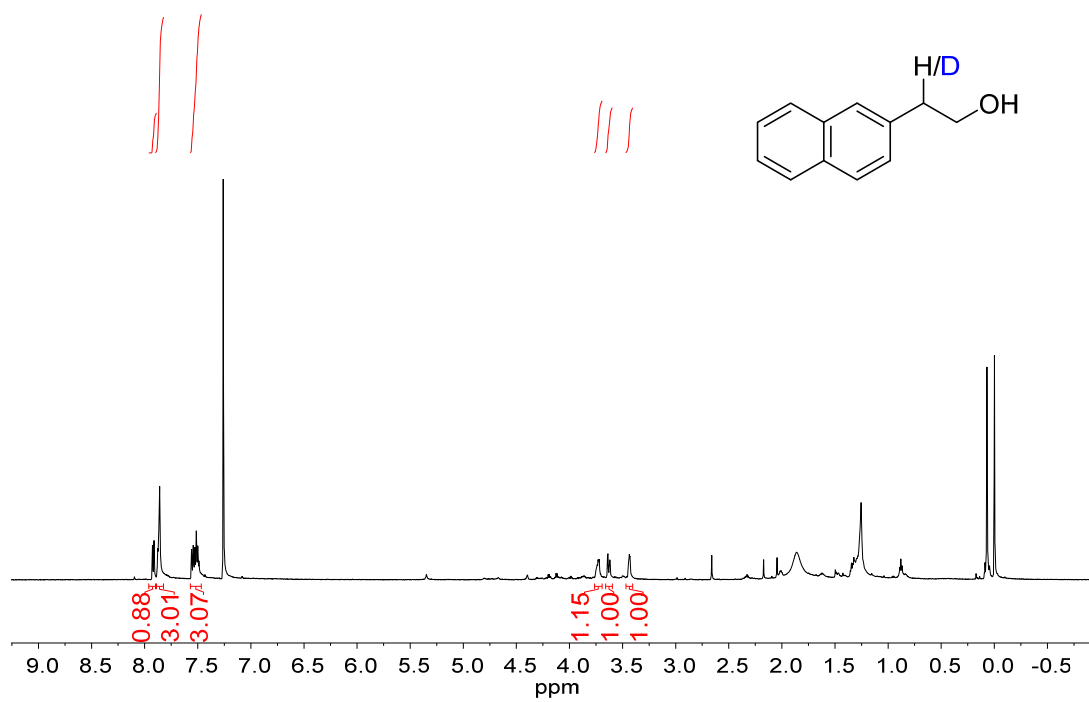

$^1\text{H}$  NMR spectrum (600 MHz, Chloroform-*d*) of 6t'

## 9.9 Control electrocarboxylation reaction of styrene substates with CO<sub>2</sub>.

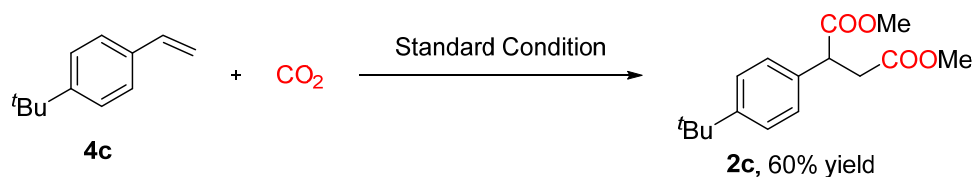

A 50 mL oven-dried electrochemical cell containing a stir bar was evacuated and back-filled under CO<sub>2</sub> flow for at least 3 times. **4c** (0.3 mmol), TBABF<sub>4</sub> (0.3 mmol) and DMF (5 mL) were added to the cell and the cell was installed with a Pt cathode and Mg anode, and the cell was closed under CO<sub>2</sub> atmosphere. Then, the reaction mixture was electrolyzed under a constant current of 10 mA for 4 h. The reaction mixture was carefully quenched with HCl (1M, 10 mL) and extracted three times with ethyl acetate (3 × 20 mL). The combined organic phase was dried by anhydrous MgSO<sub>4</sub> and evaporated in vacuum. The residue was methylated at 0°C with TMSCHN<sub>2</sub> (2M, 0.6 mL) in 2 mL of ether/methanol (1:1 v/v) solvent. Finally, the corresponding methylation product **2c** (52 mg, 60% yield) was purified by column chromatography (10:1 v/v petroleum ether/ethyl acetate).

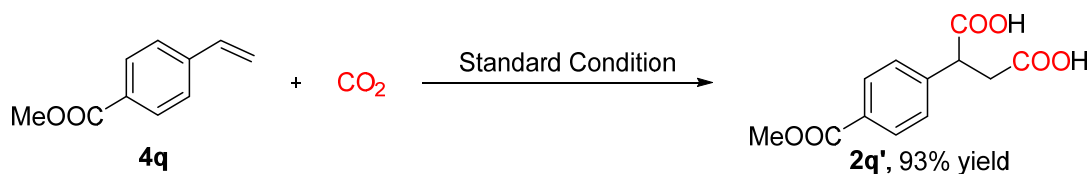

A 50 mL oven-dried electrochemical cell containing a stir bar was evacuated and back-filled under CO<sub>2</sub> flow for at least 3 times. **4q** (0.3 mmol), TBABF<sub>4</sub> (0.3 mmol) and DMF (5 mL) were added to the cell and the cell was installed with a Pt cathode and Mg anode, and the cell was closed under CO<sub>2</sub> atmosphere. Then, the reaction mixture was electrolyzed under a constant current of 10 mA for 4 h. The reaction mixture was carefully quenched with HCl (1M, 10 mL) and extracted three times with ethyl acetate (3 × 20 mL). The combined organic phase was dried by anhydrous NaSO<sub>4</sub>. The solvents were removed under reduced pressure and the crude residue was purified by flash column chromatography (petroleum ether/ethyl acetate/AcOH 1/1/0.005) to give desired product **2q'**, white solid, 70 mg, 93% yield.

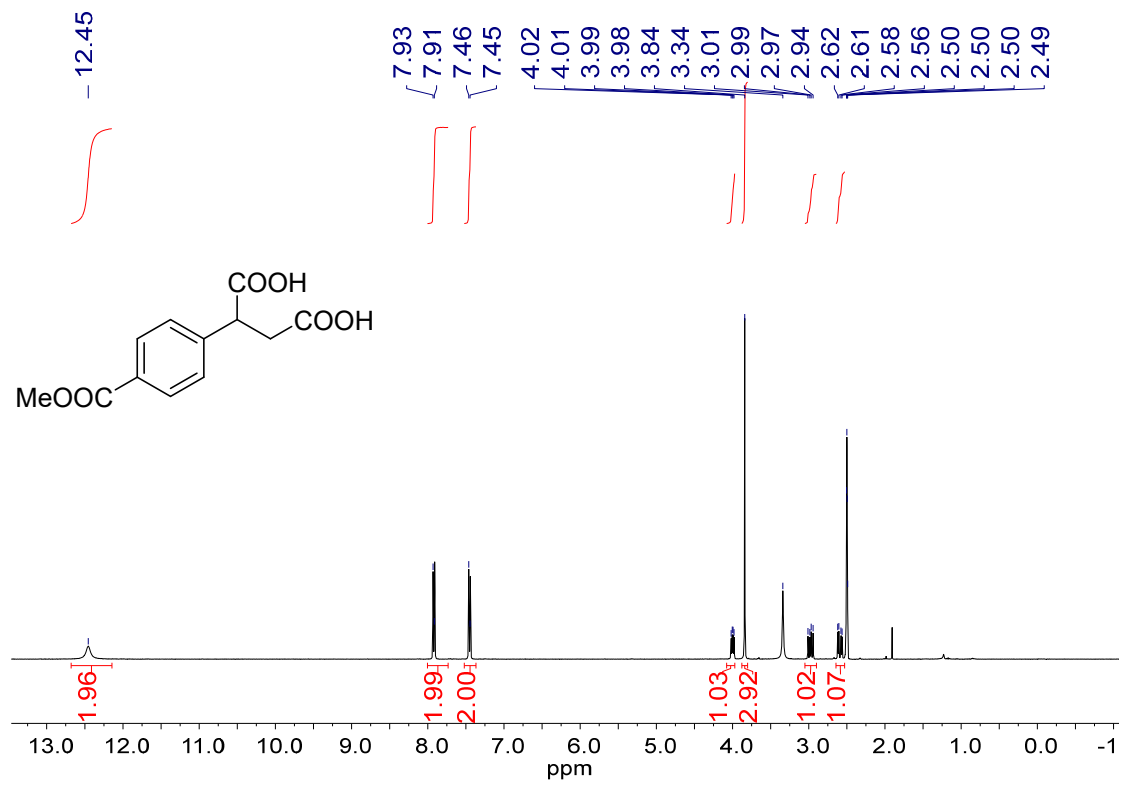

## 10. NMR spectra of substrates and all products

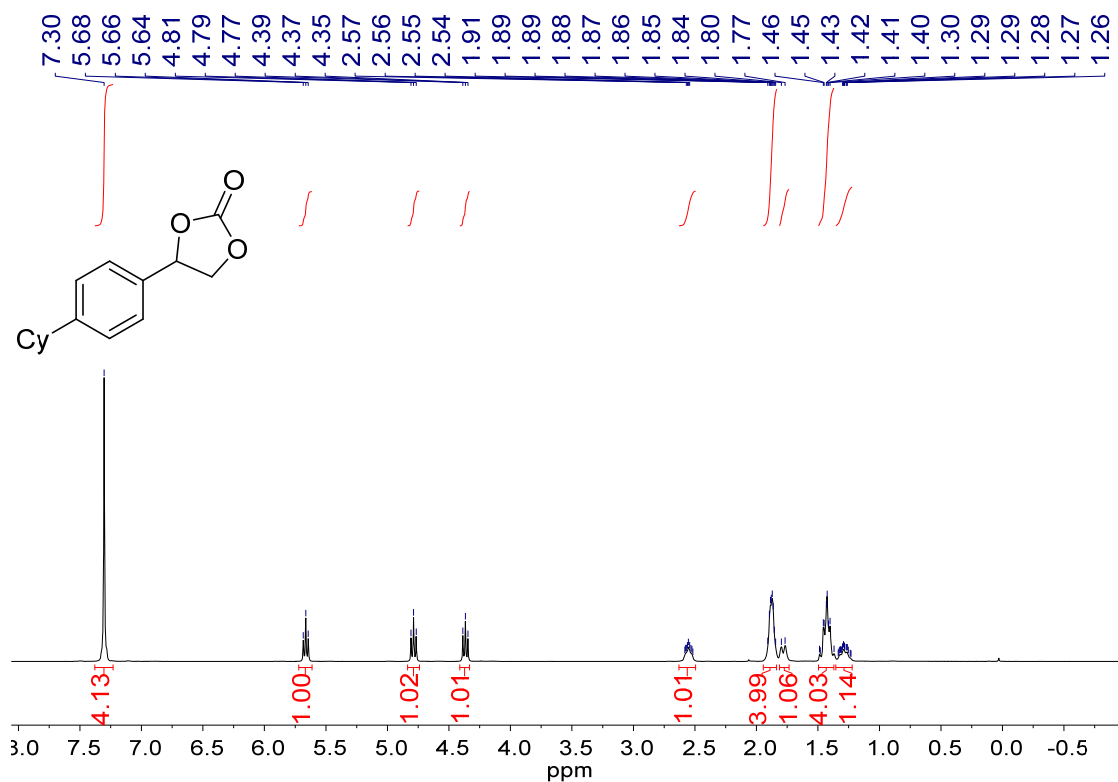

$^1\text{H}$  NMR spectrum (400 MHz, Chloroform-*d*) of 1d

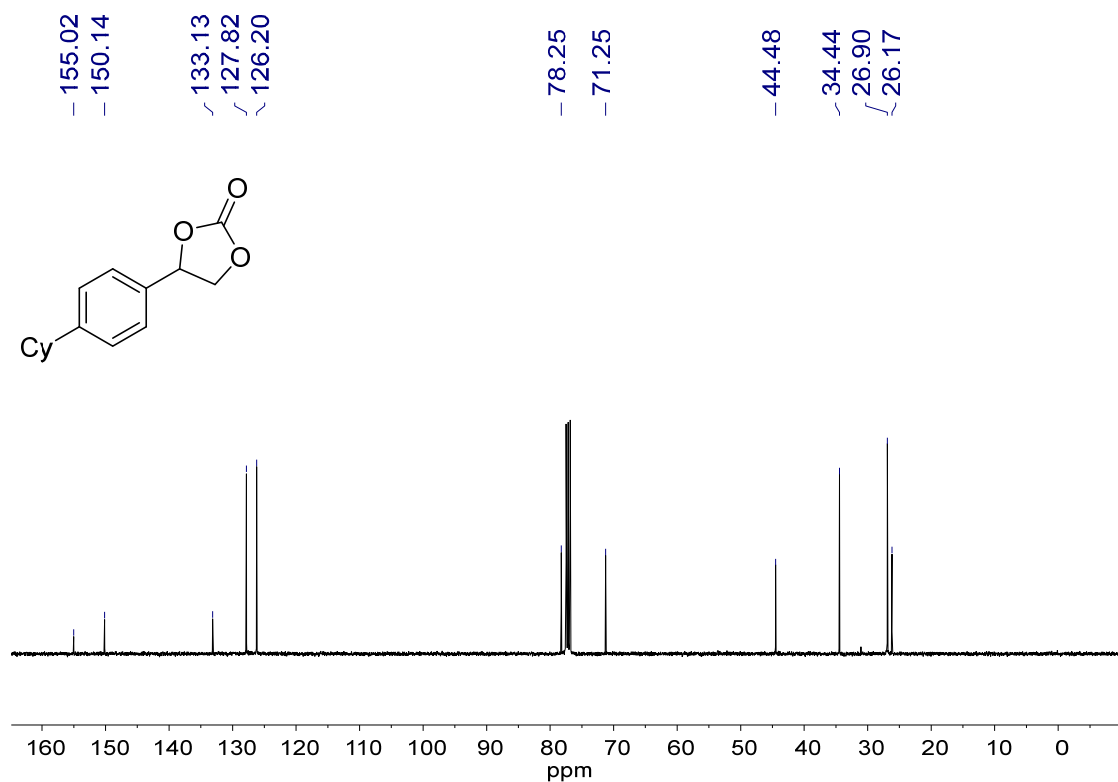

$^{13}\text{C}\{^1\text{H}\}$  NMR spectrum (101 MHz, Chloroform-*d*) of 1d

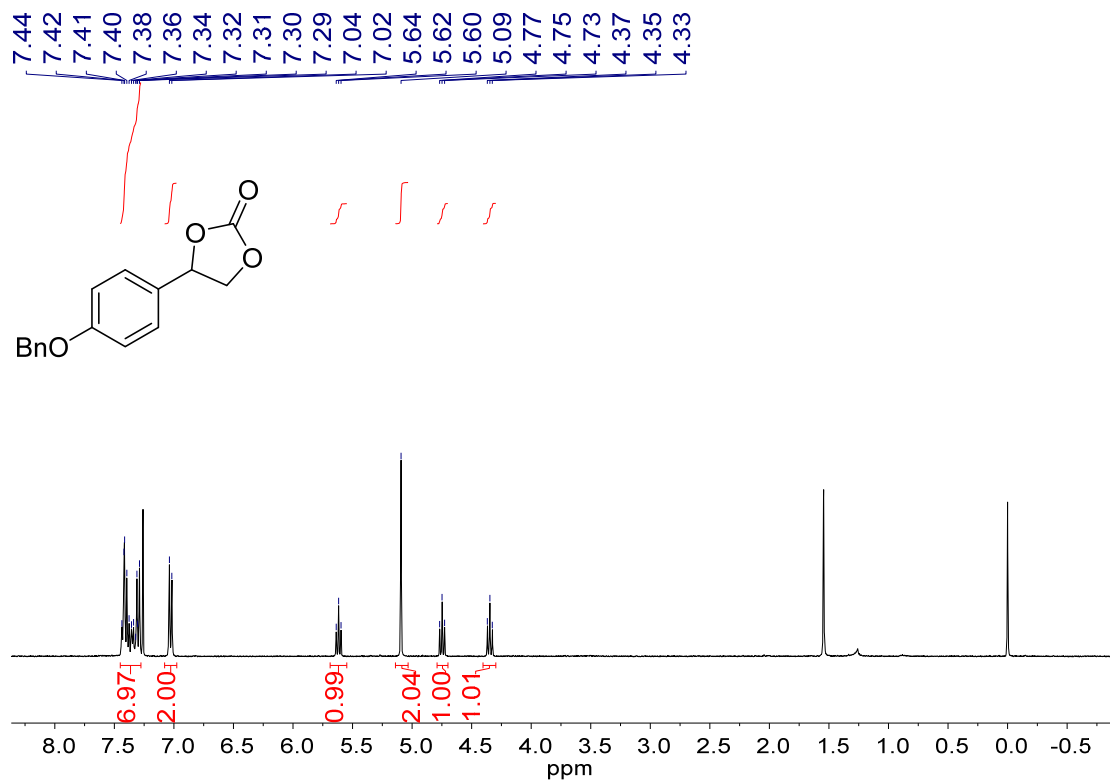

<sup>1</sup>H NMR spectrum (400 MHz, Chloroform-*d*) of 1f

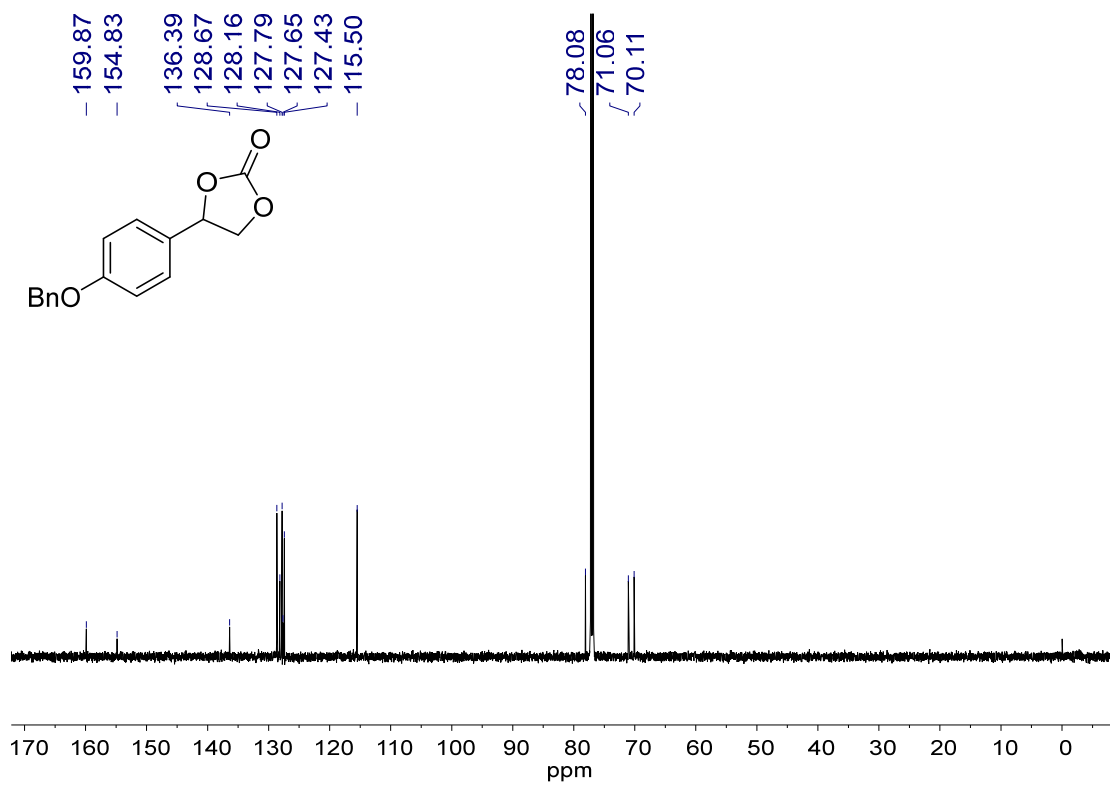

<sup>13</sup>C{<sup>1</sup>H} NMR spectrum (151 MHz, Chloroform-*d*) of 1f

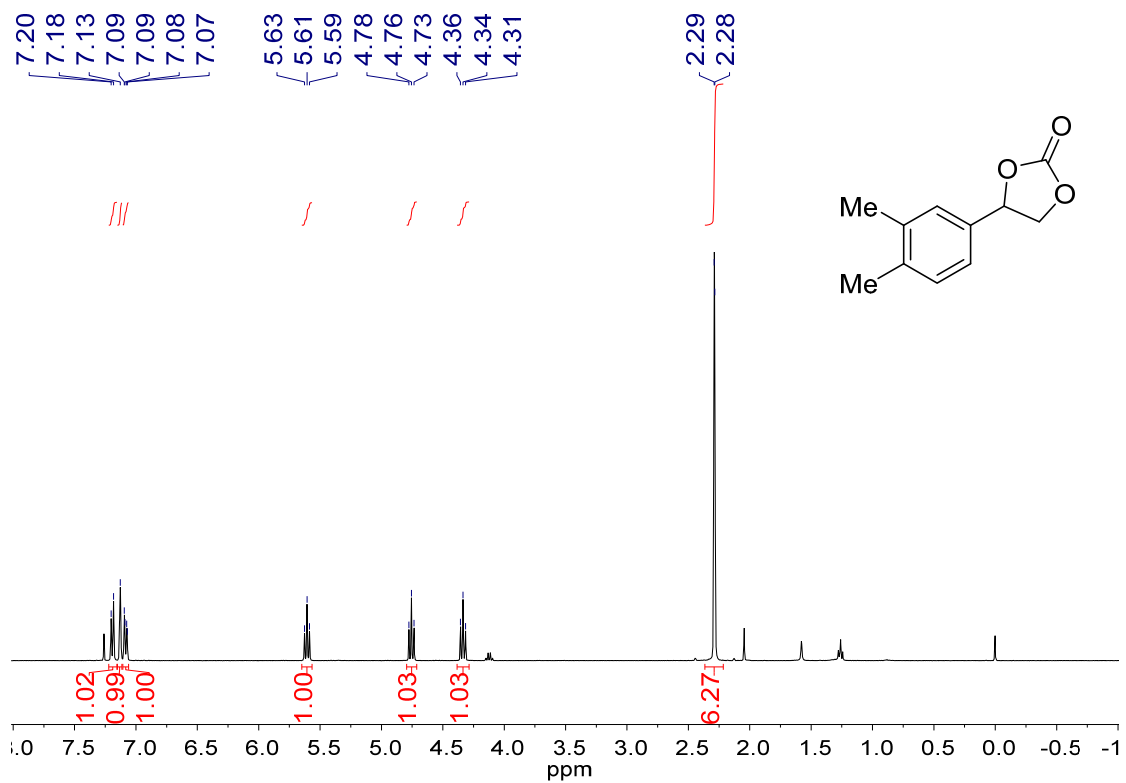

<sup>1</sup>H NMR spectrum (400 MHz, Chloroform-*d*) of 1h

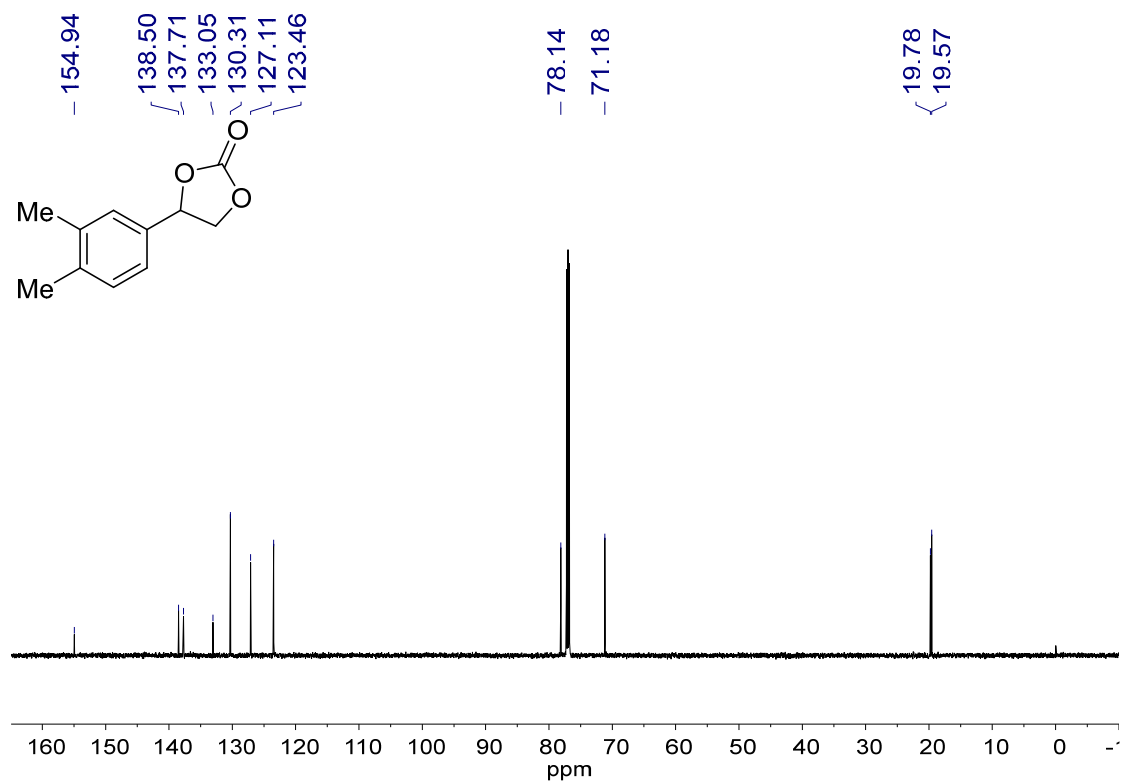

<sup>13</sup>C{<sup>1</sup>H} NMR spectrum (151 MHz, Chloroform-*d*) of 1h

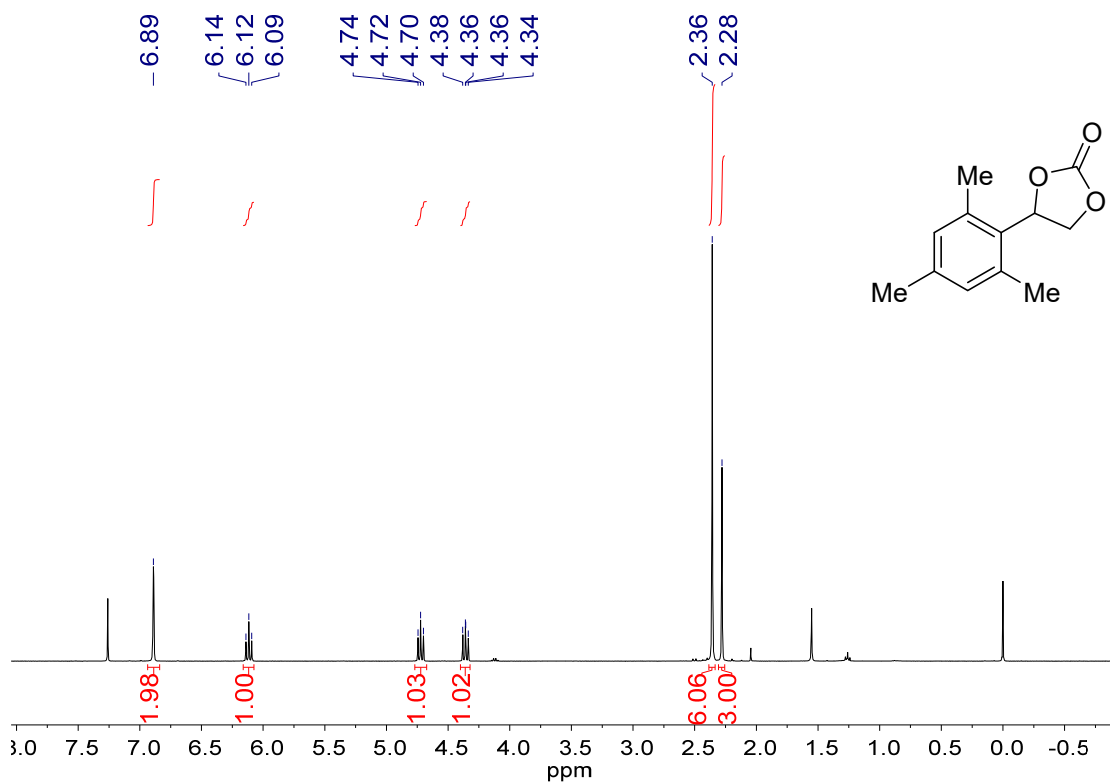

**<sup>1</sup>H NMR spectrum (400 MHz, Chloroform-*d*) of 1j**

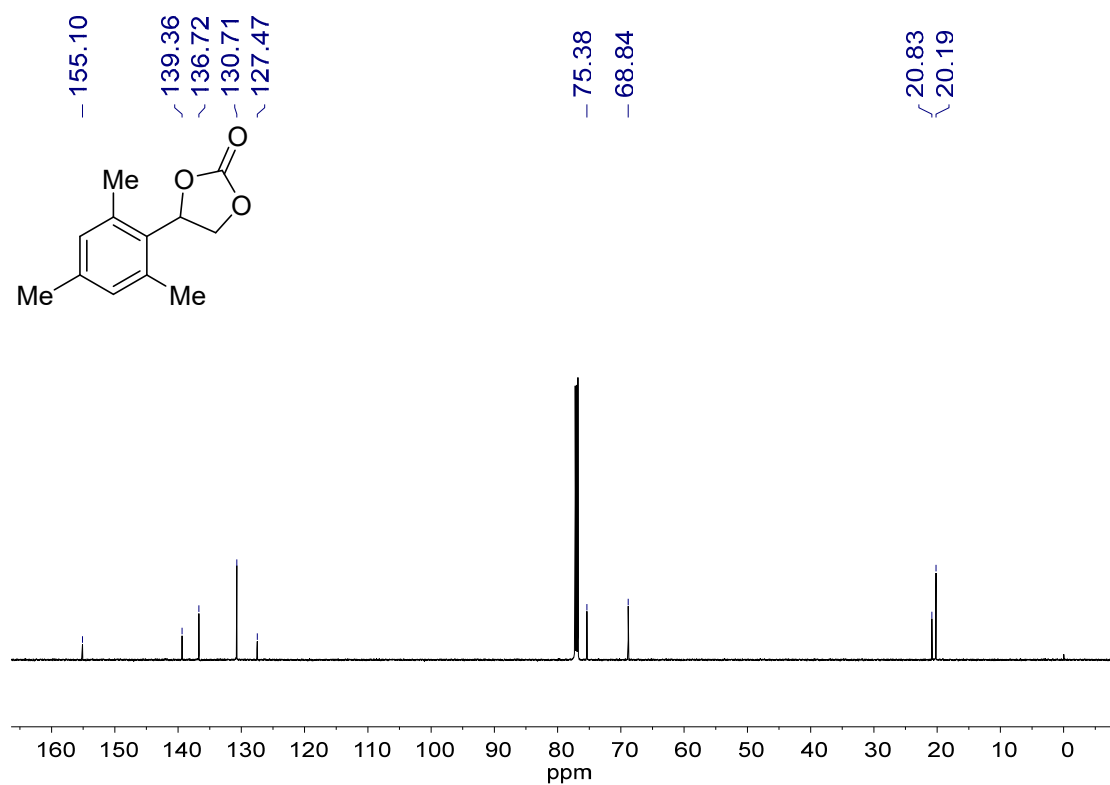

**<sup>13</sup>C{<sup>1</sup>H} NMR spectrum (151 MHz, Chloroform-*d*) of 1j**

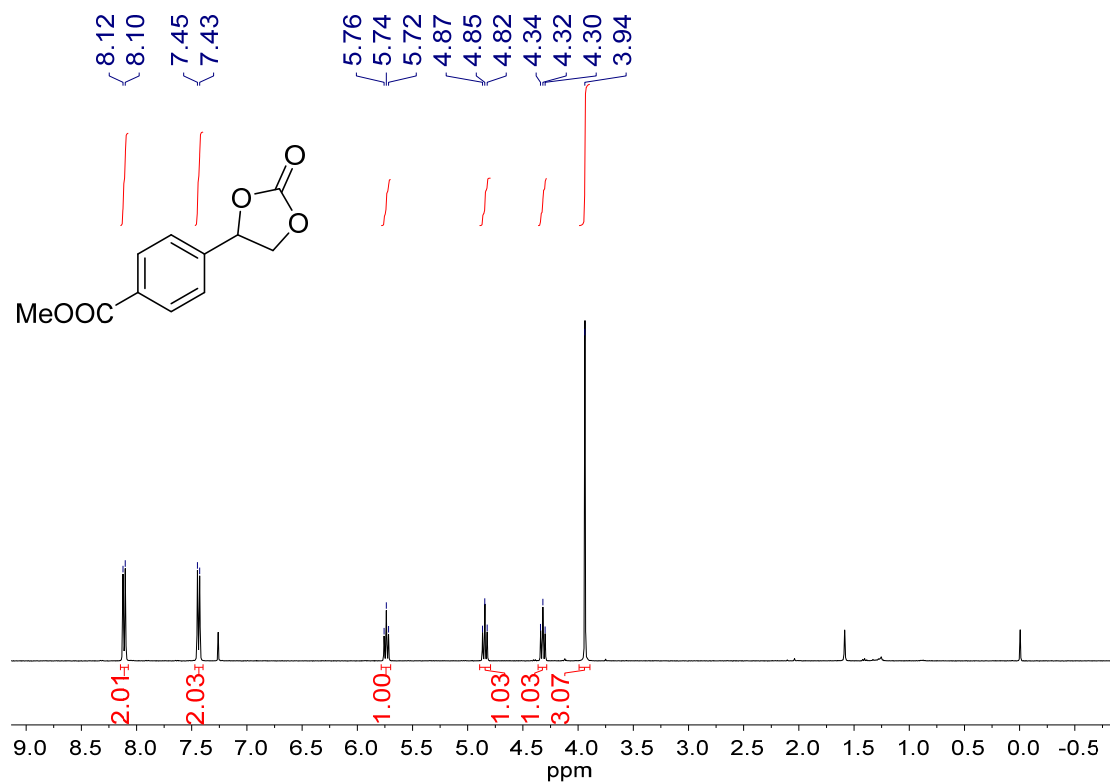

**<sup>1</sup>H NMR spectrum (400 MHz, Chloroform-*d*) of 1q**

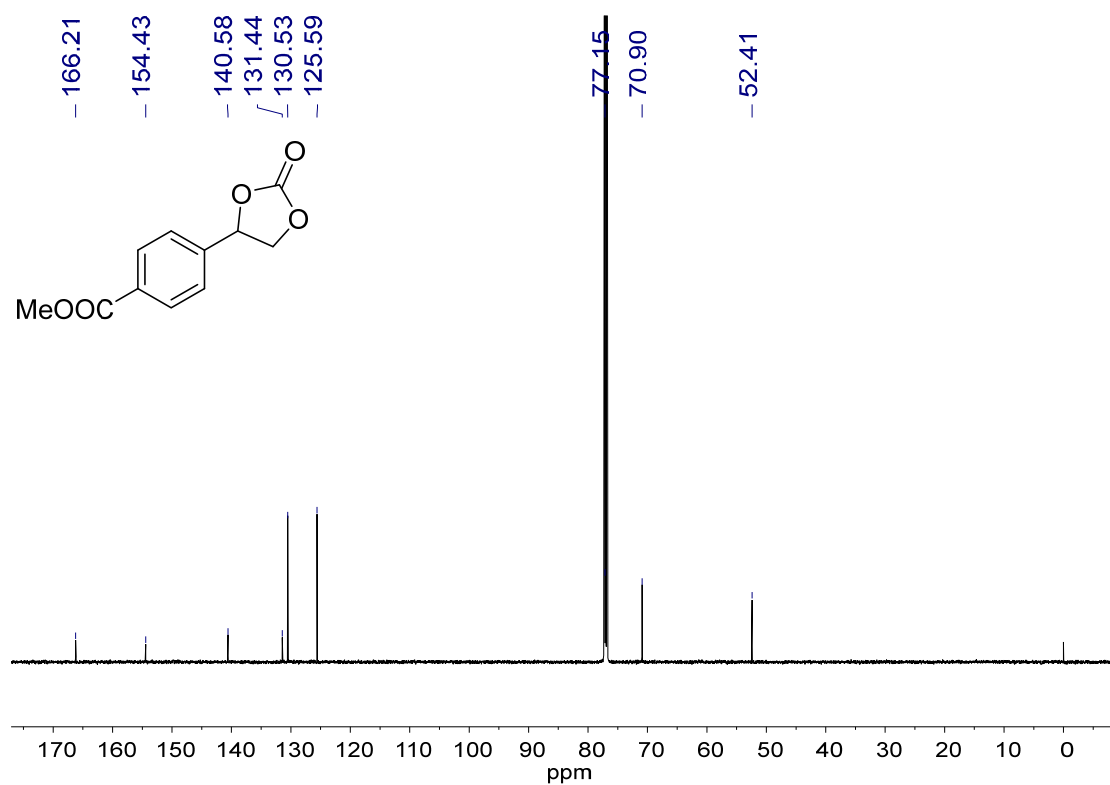

**<sup>13</sup>C{<sup>1</sup>H} NMR spectrum (151 MHz, Chloroform-*d*) of 1q**



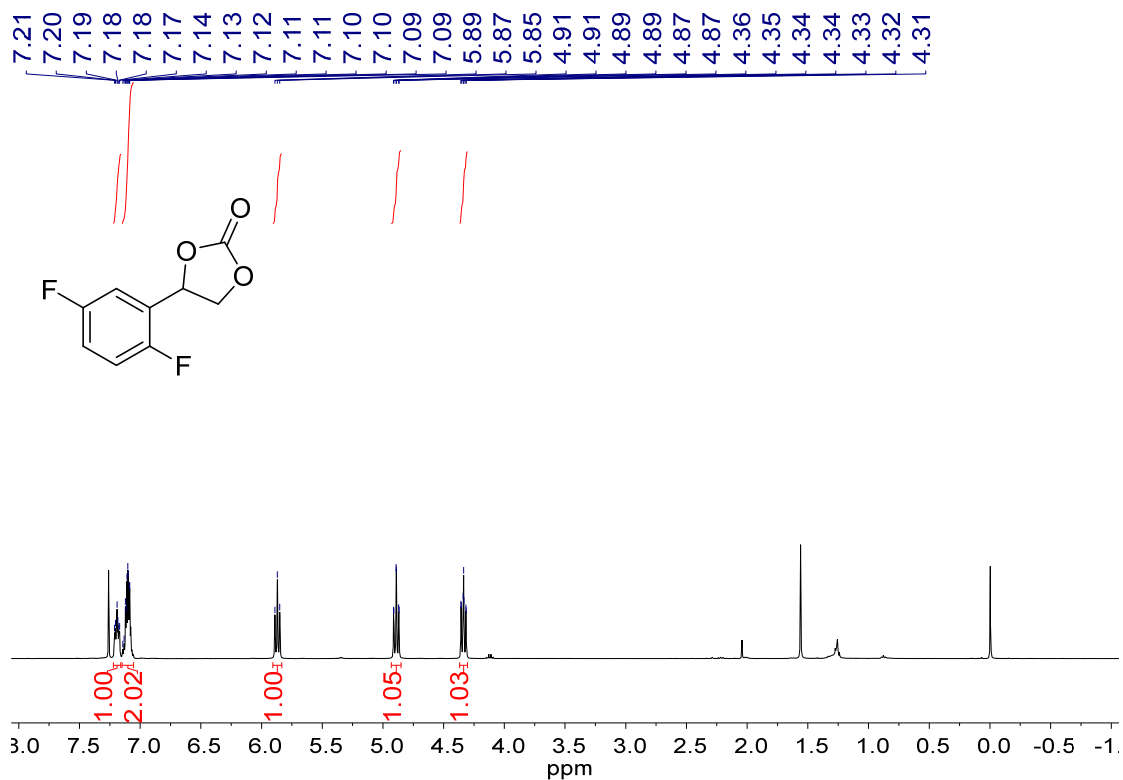

<sup>1</sup>H NMR spectrum (400 MHz, Chloroform-*d*) of 1s

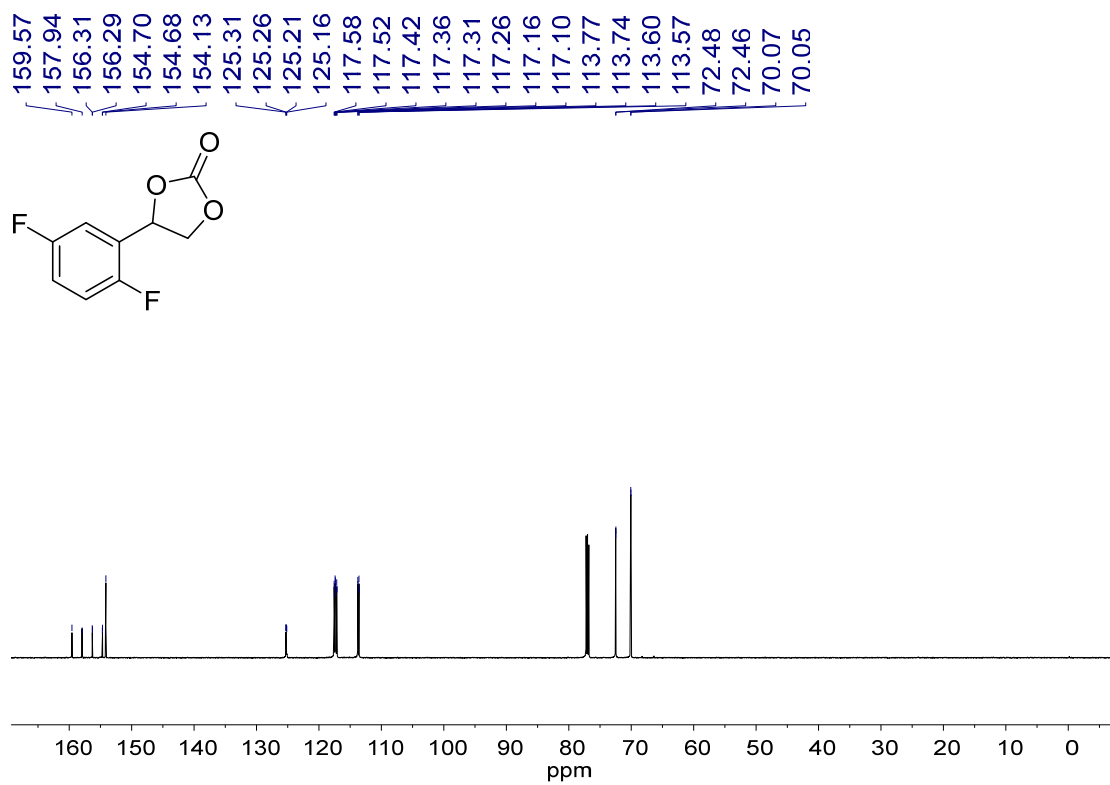

<sup>13</sup>C{<sup>1</sup>H} NMR spectrum (151 MHz, Chloroform-*d*) of 1s

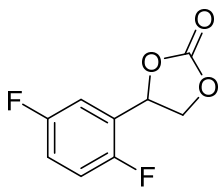

116.56  
116.59  
124.07  
124.10

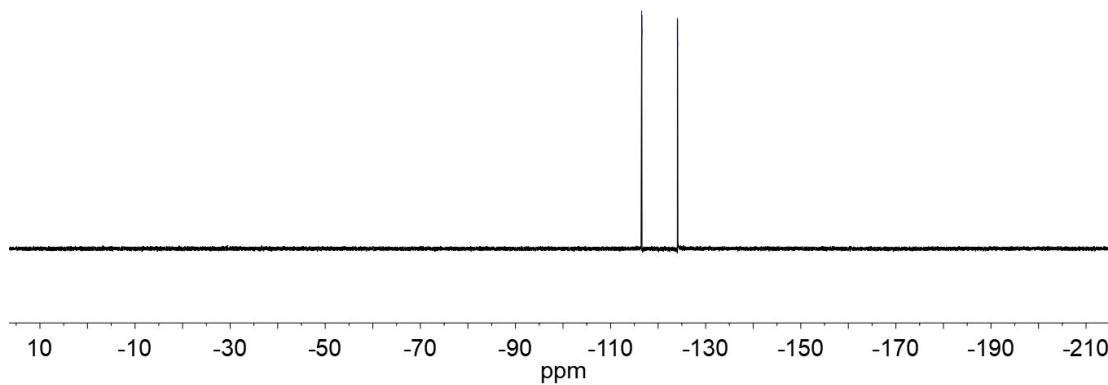

**$^{19}\text{F}$  NMR spectrum (376 MHz, Chloroform-*d*) of 1s**

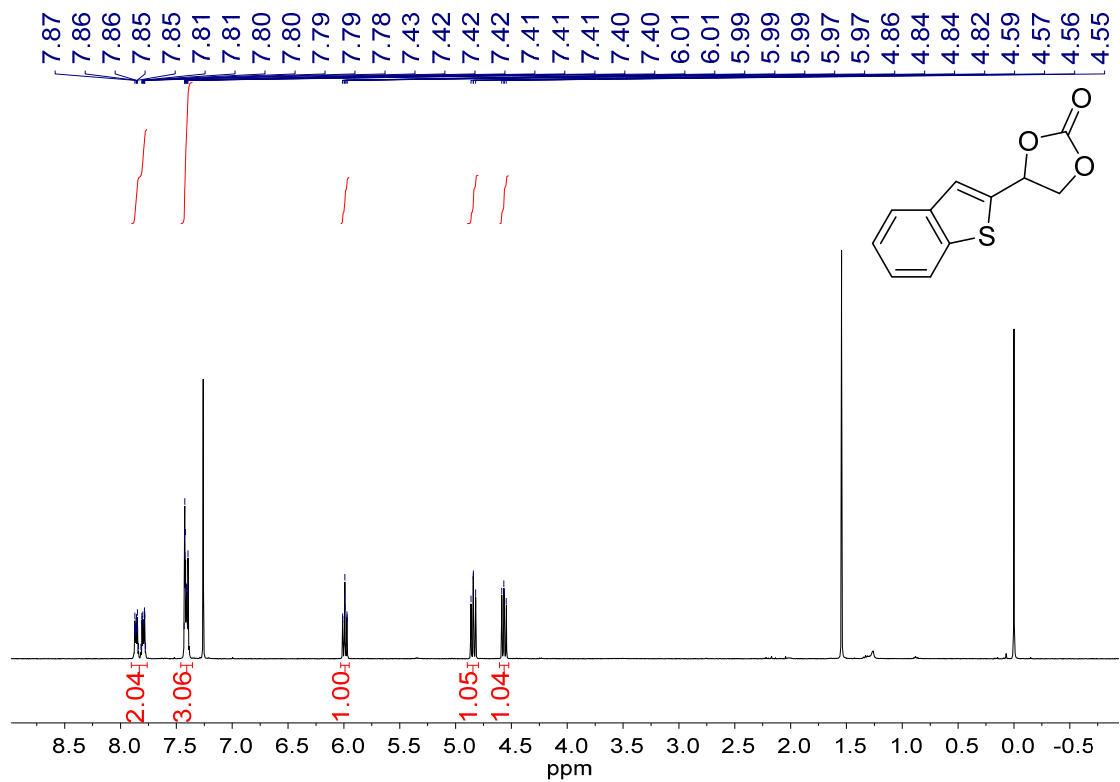

**<sup>1</sup>H NMR spectrum (400 MHz, Chloroform-*d*) of 1v**

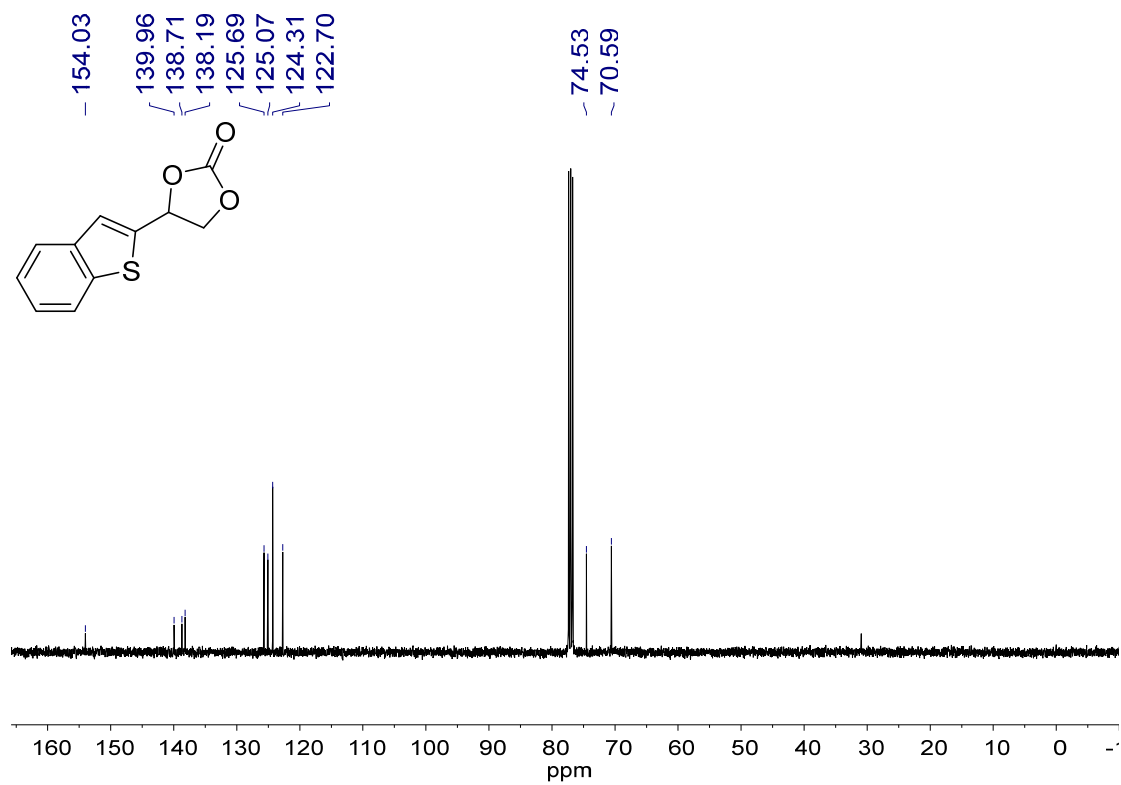

**<sup>13</sup>C{<sup>1</sup>H} NMR spectrum (101 MHz, Chloroform-*d*) of 1v**

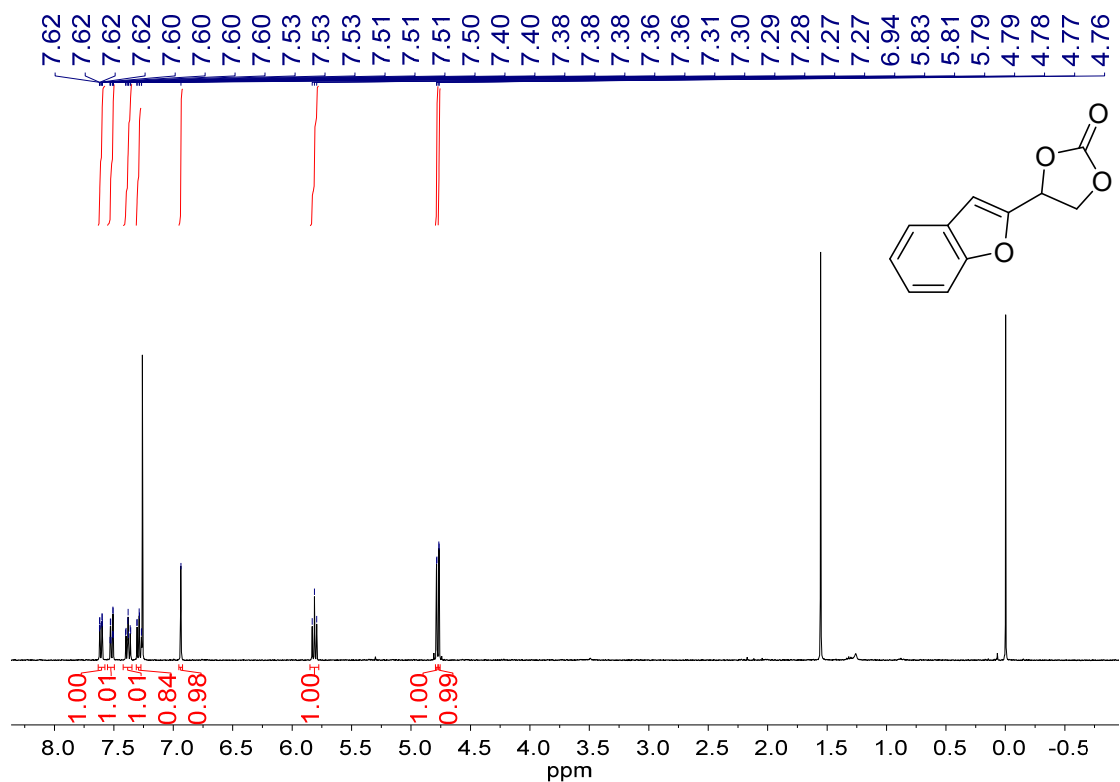

**<sup>1</sup>H NMR spectrum (400 MHz, Chloroform-*d*) of 1w**

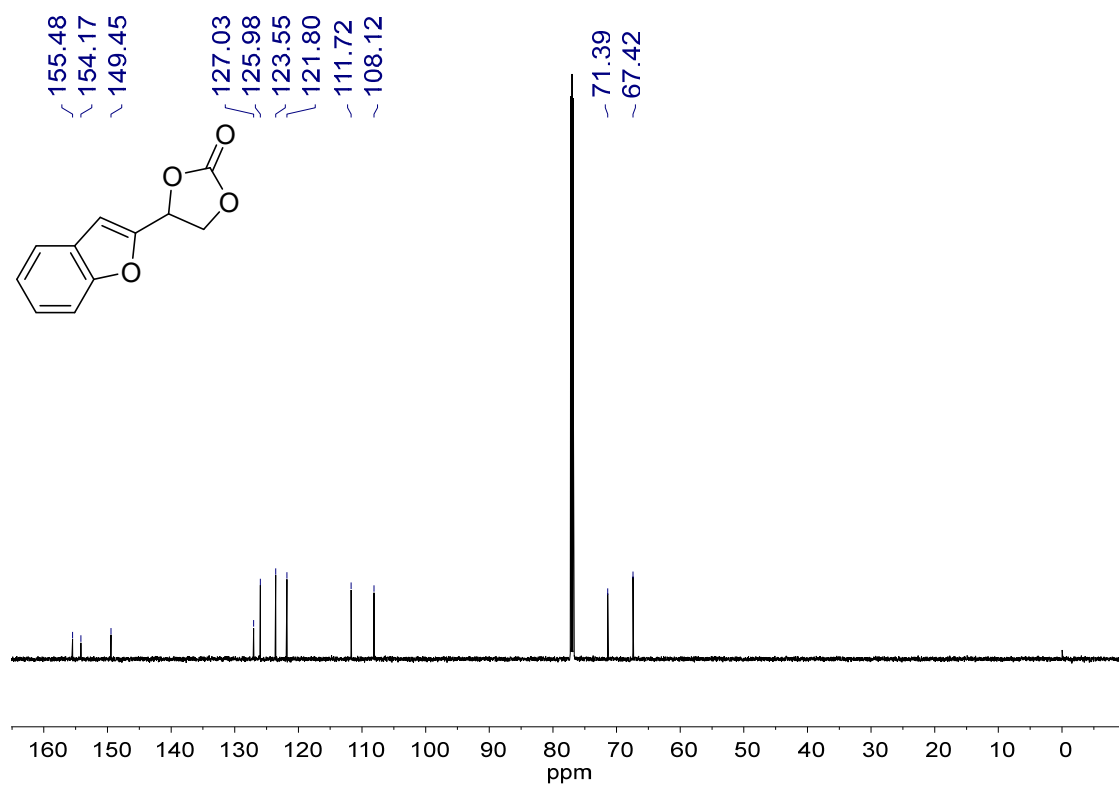

**<sup>13</sup>C{<sup>1</sup>H} NMR spectrum (151 MHz, Chloroform-*d*) of 1w**

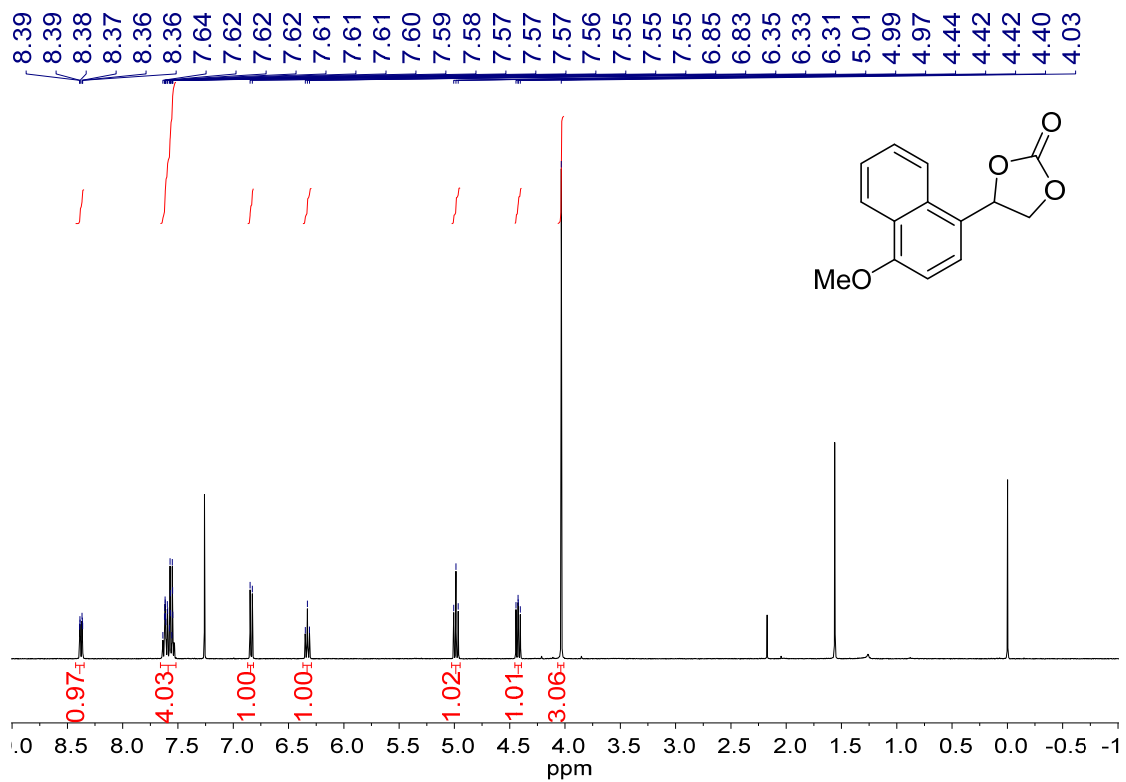

**<sup>1</sup>H NMR spectrum (400 MHz, Chloroform-*d*) of 1x**

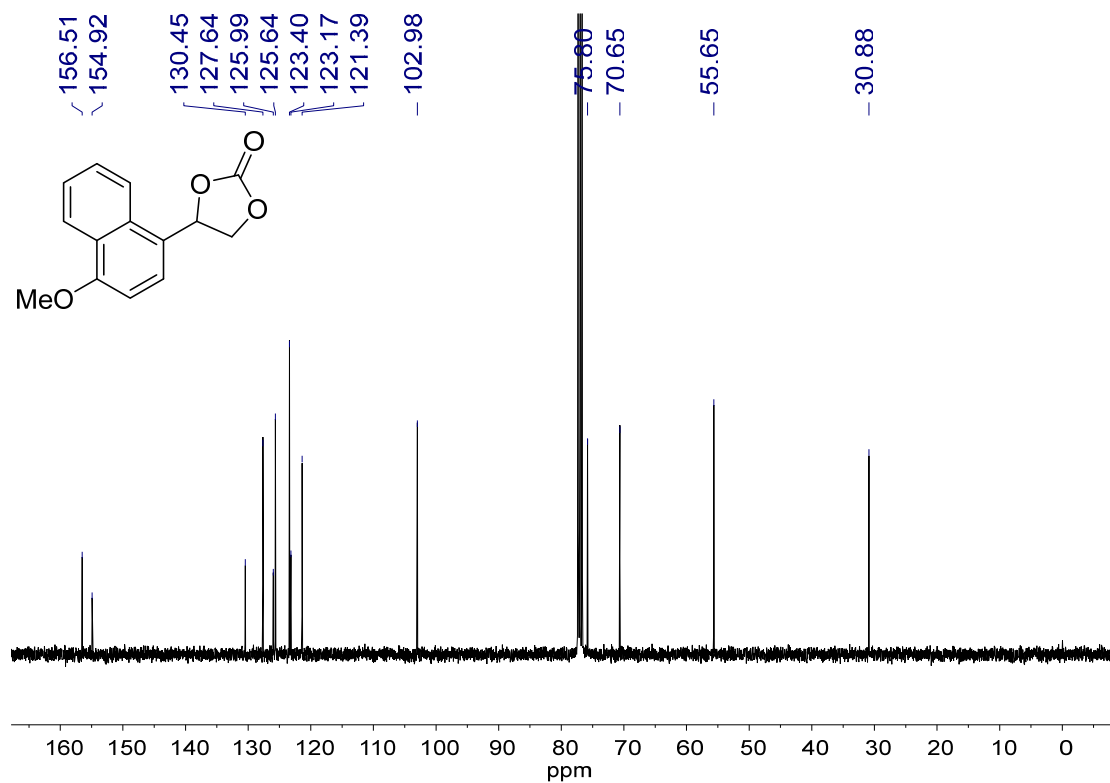

**<sup>13</sup>C{<sup>1</sup>H} NMR spectrum (101 MHz, Chloroform-*d*) of 1x**

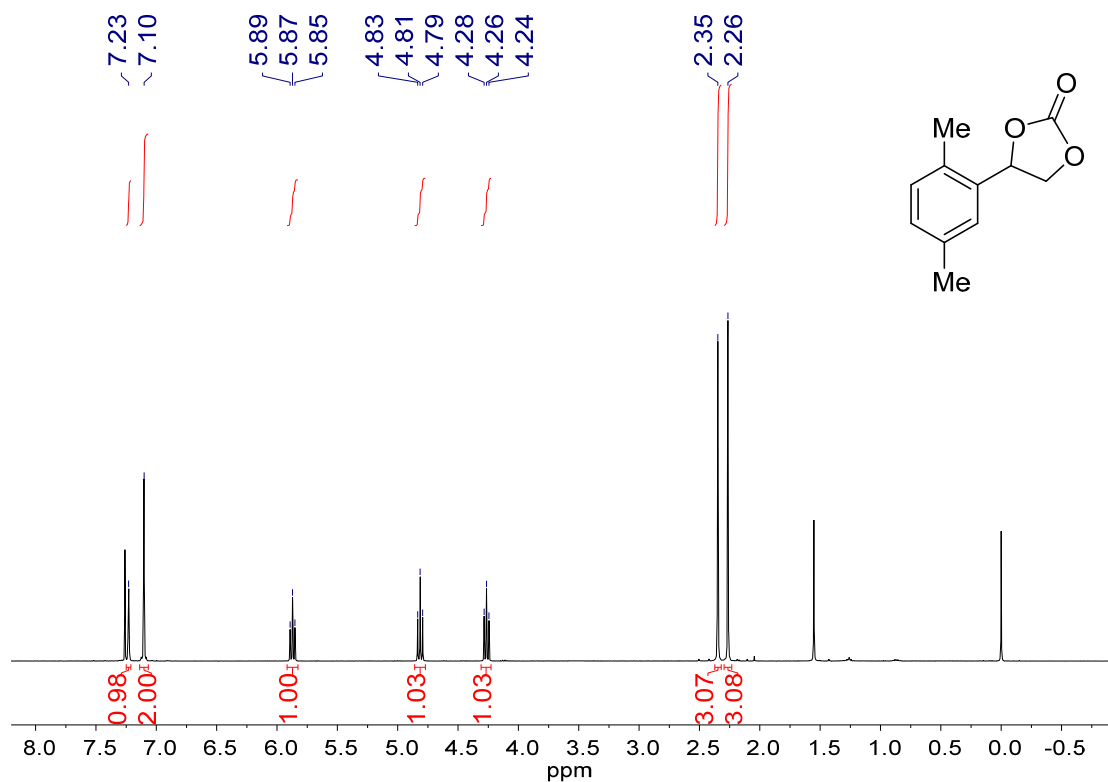

**$^1\text{H}$  NMR spectrum (400 MHz, Chloroform-*d*) of 1ab**

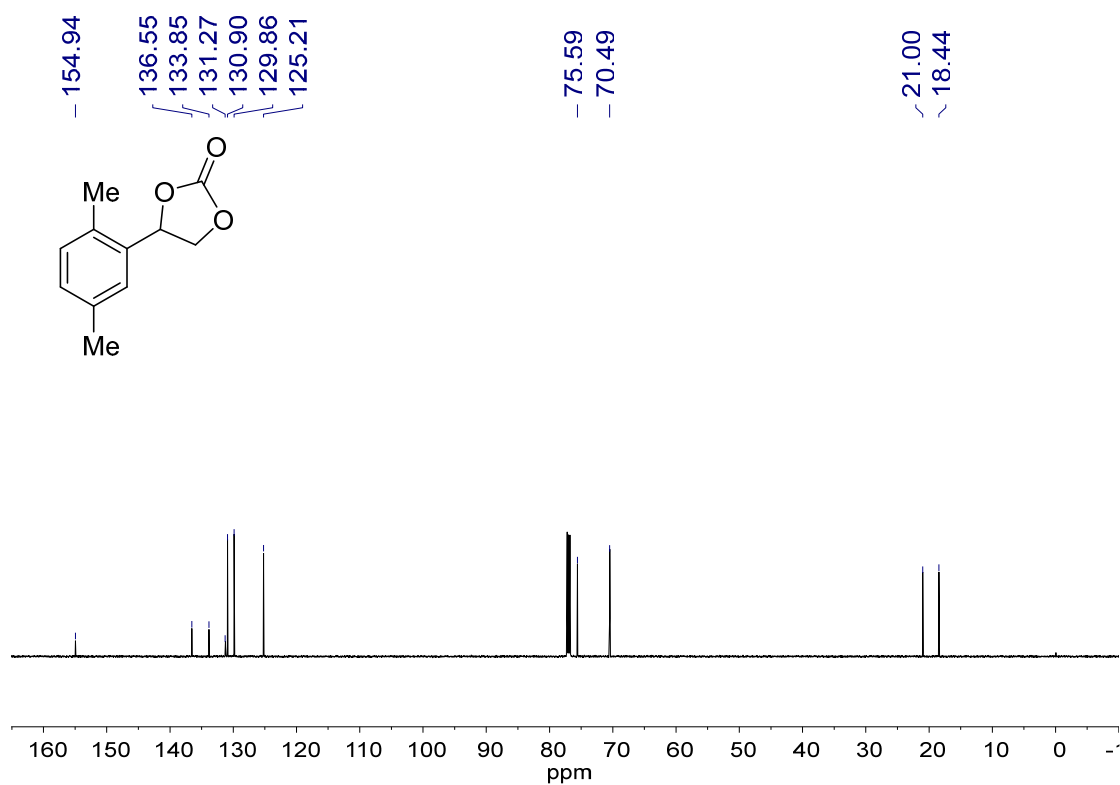

**$^{13}\text{C}\{^1\text{H}\}$  NMR spectrum (151 MHz, Chloroform-*d*) of 1ab**

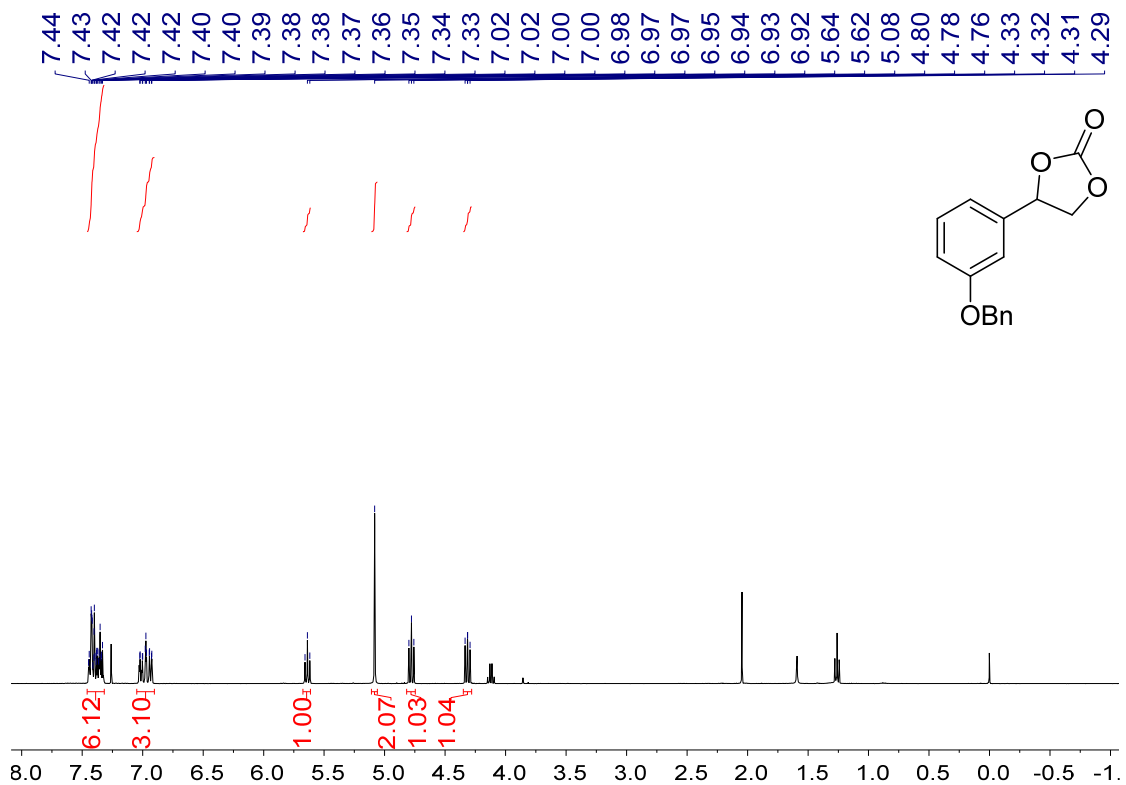

<sup>1</sup>H NMR spectrum (400 MHz, Chloroform-*d*) of 1ad

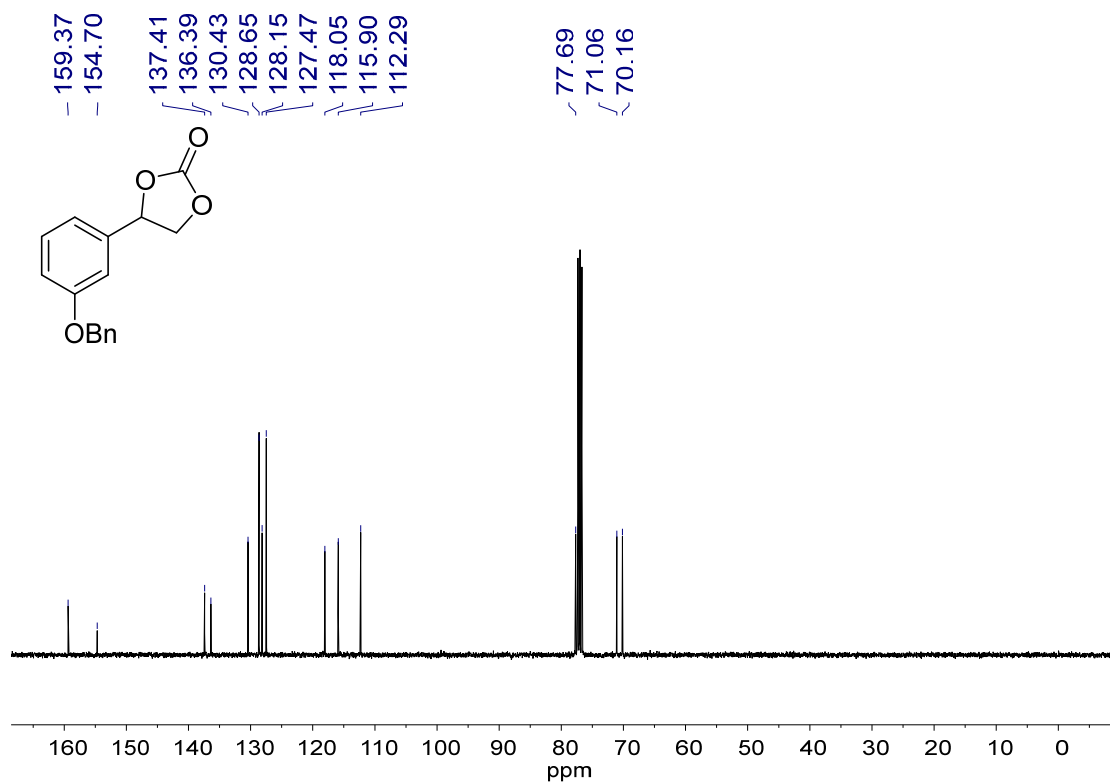

<sup>13</sup>C{<sup>1</sup>H} NMR spectrum (101 MHz, Chloroform-*d*) of 1ad

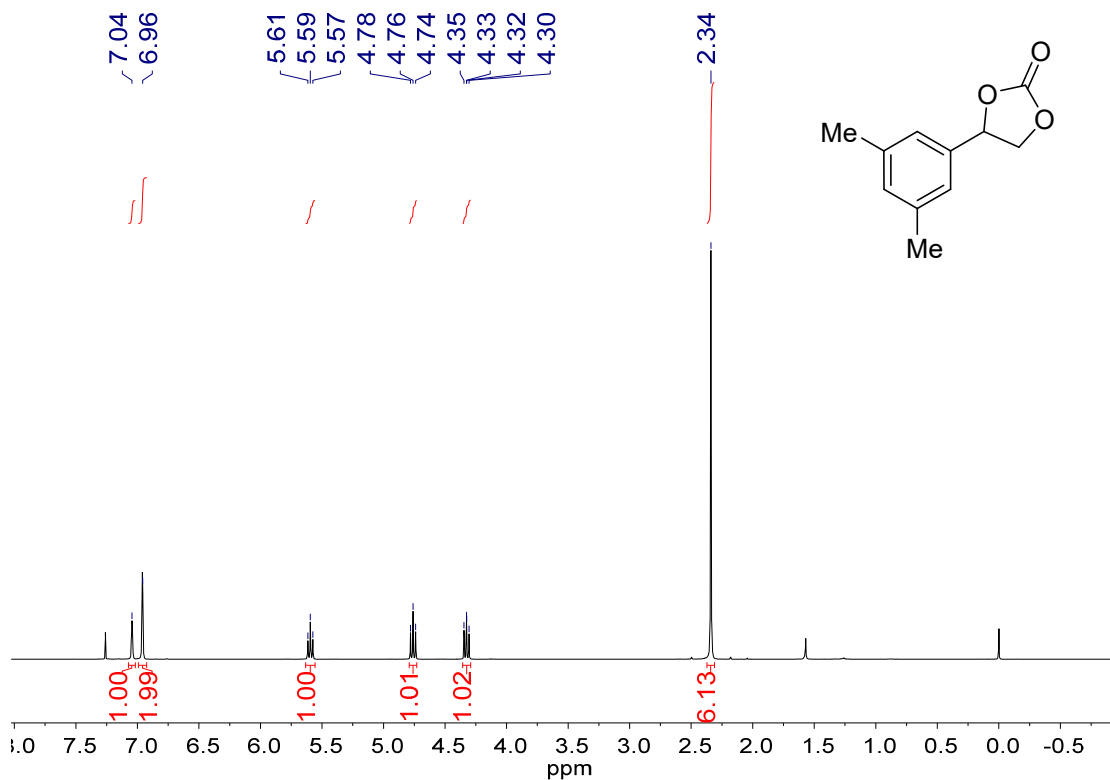

**<sup>1</sup>H NMR spectrum (400 MHz, Chloroform-*d*) of 1ae**

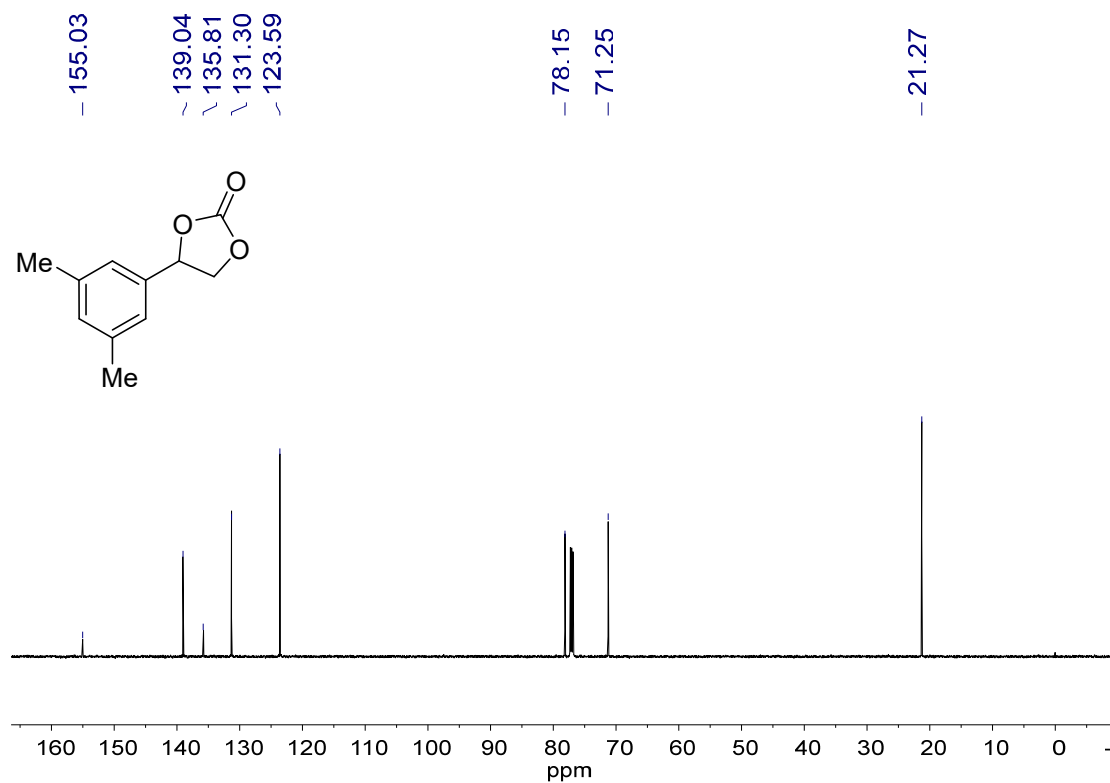

**<sup>13</sup>C{<sup>1</sup>H} NMR spectrum (151 MHz, Chloroform-*d*) of 1ae**



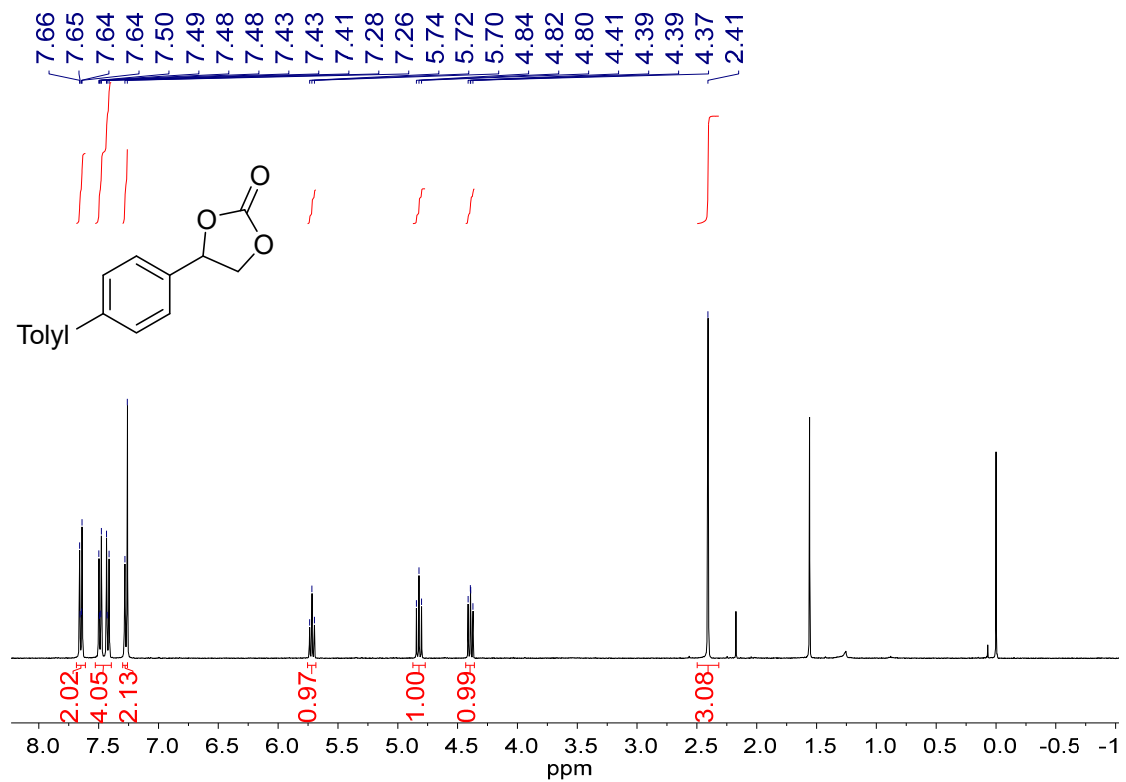

<sup>1</sup>H NMR spectrum (400 MHz, Chloroform-*d*) of 1ag

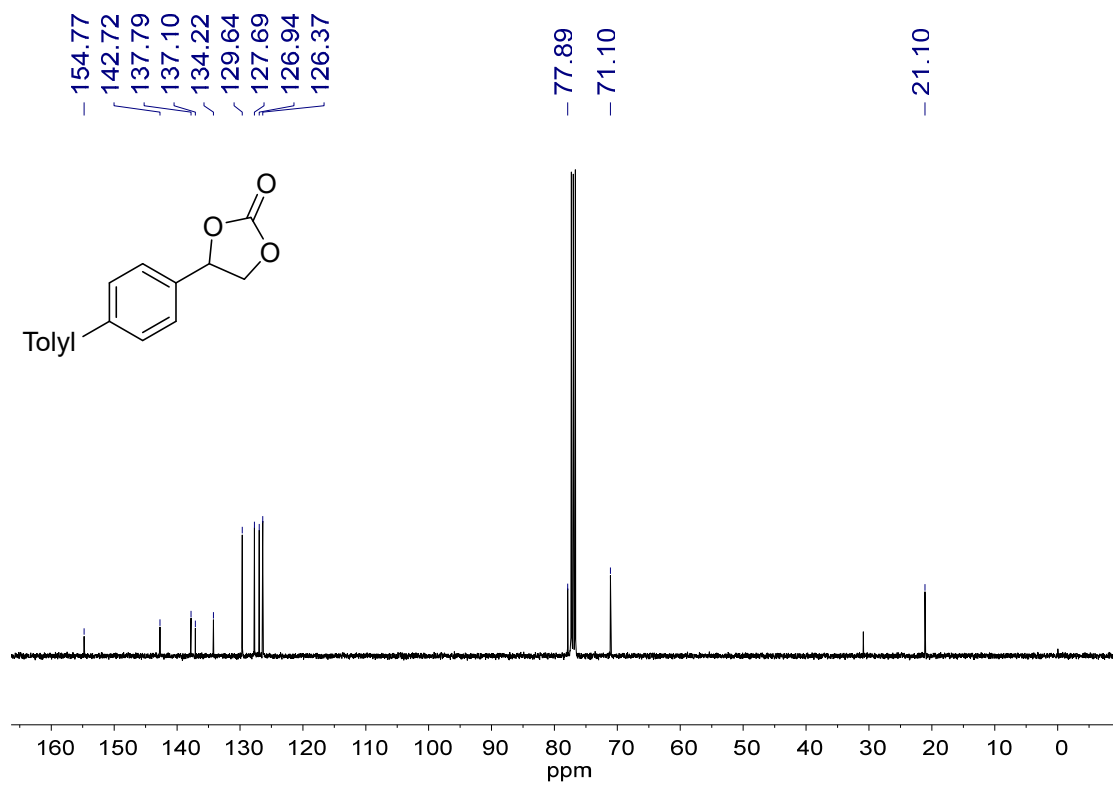

<sup>13</sup>C{<sup>1</sup>H} NMR spectrum (101 MHz, Chloroform-*d*) of 1ag

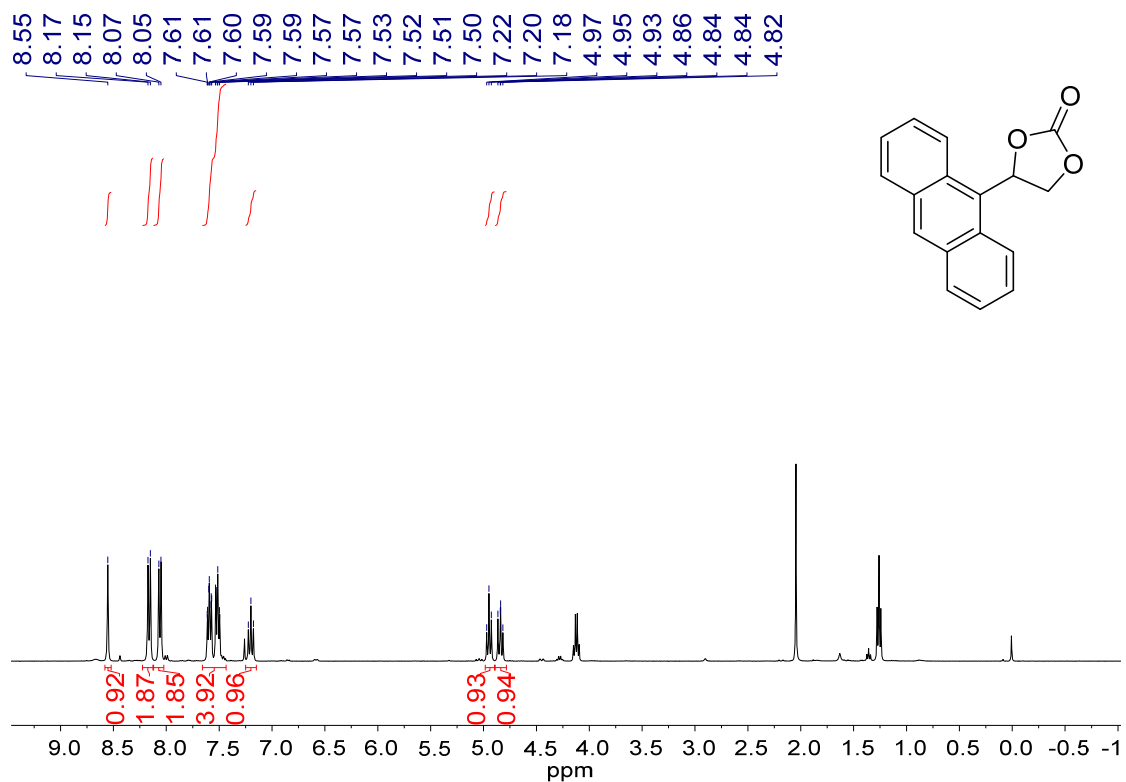

**<sup>1</sup>H NMR spectrum (400 MHz, Chloroform-*d*) of 1ai**

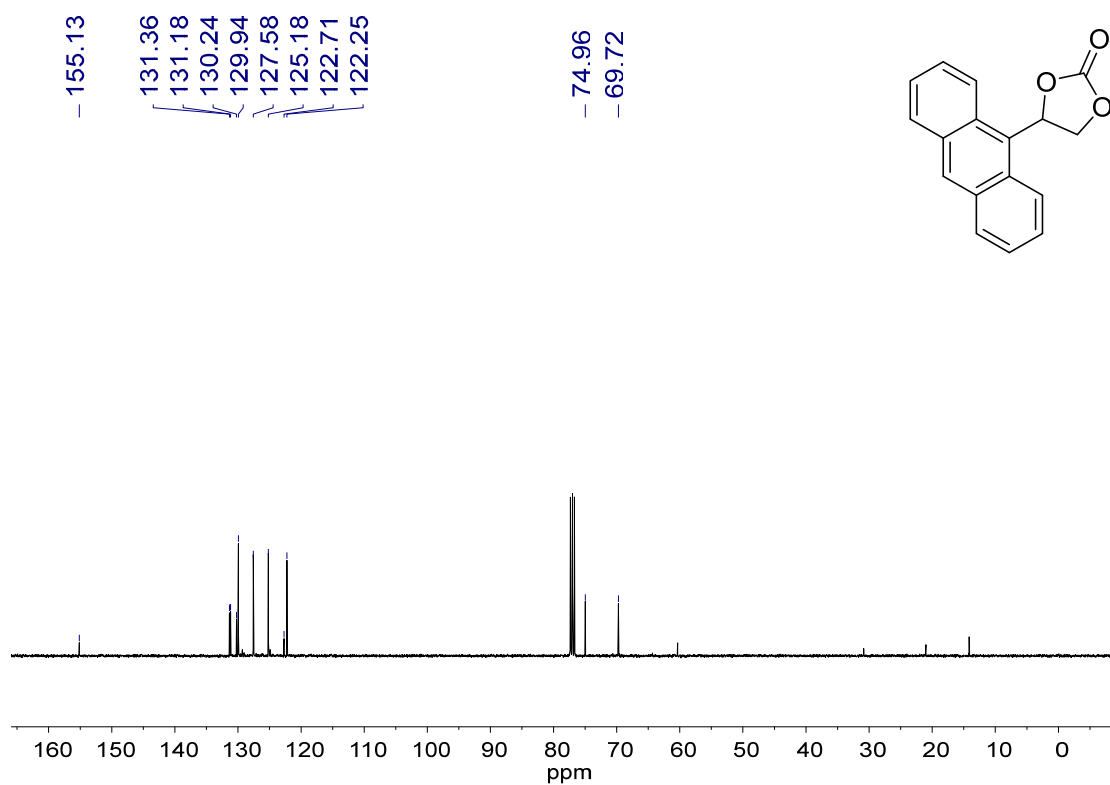

**<sup>13</sup>C{<sup>1</sup>H} NMR spectrum (101 MHz, Chloroform-*d*) of 1ai**

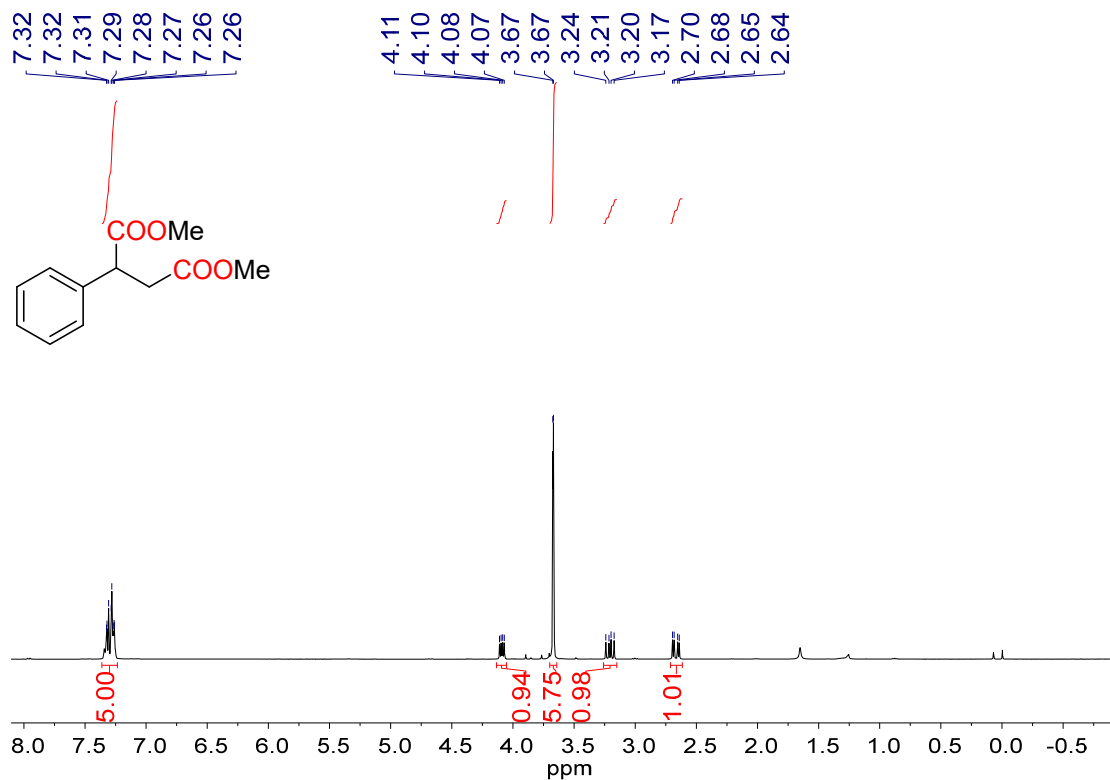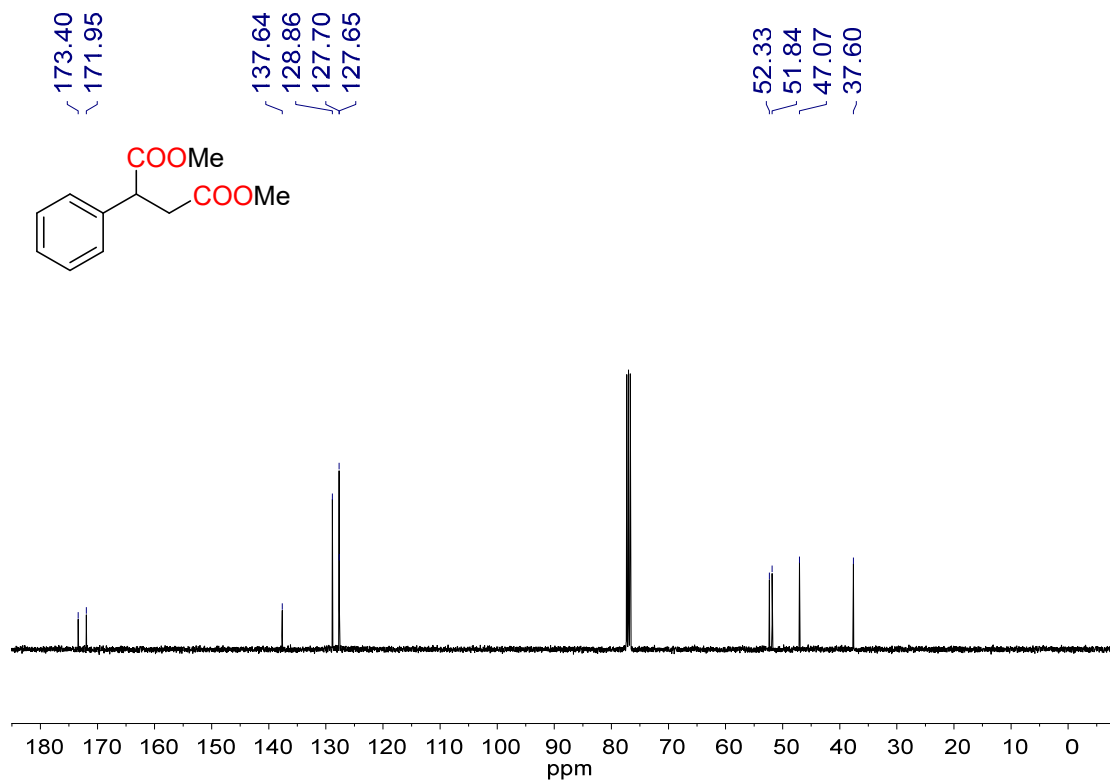

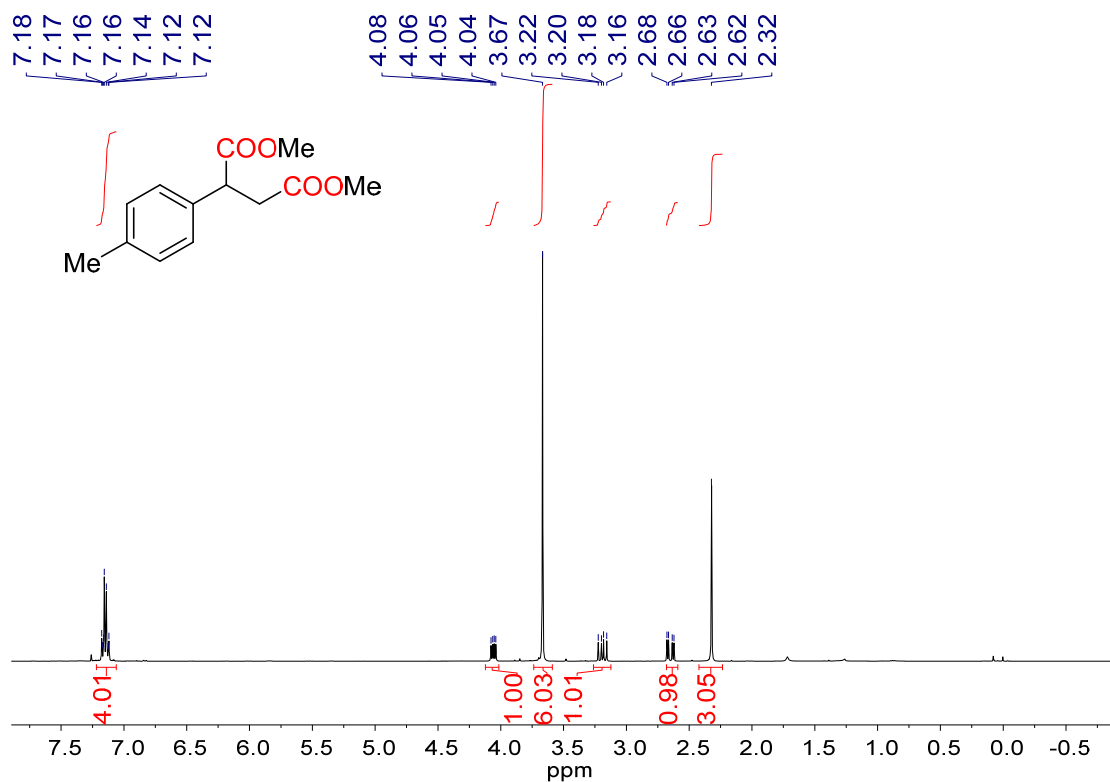

<sup>1</sup>H NMR spectrum (400 MHz, Chloroform-*d*) of 2b

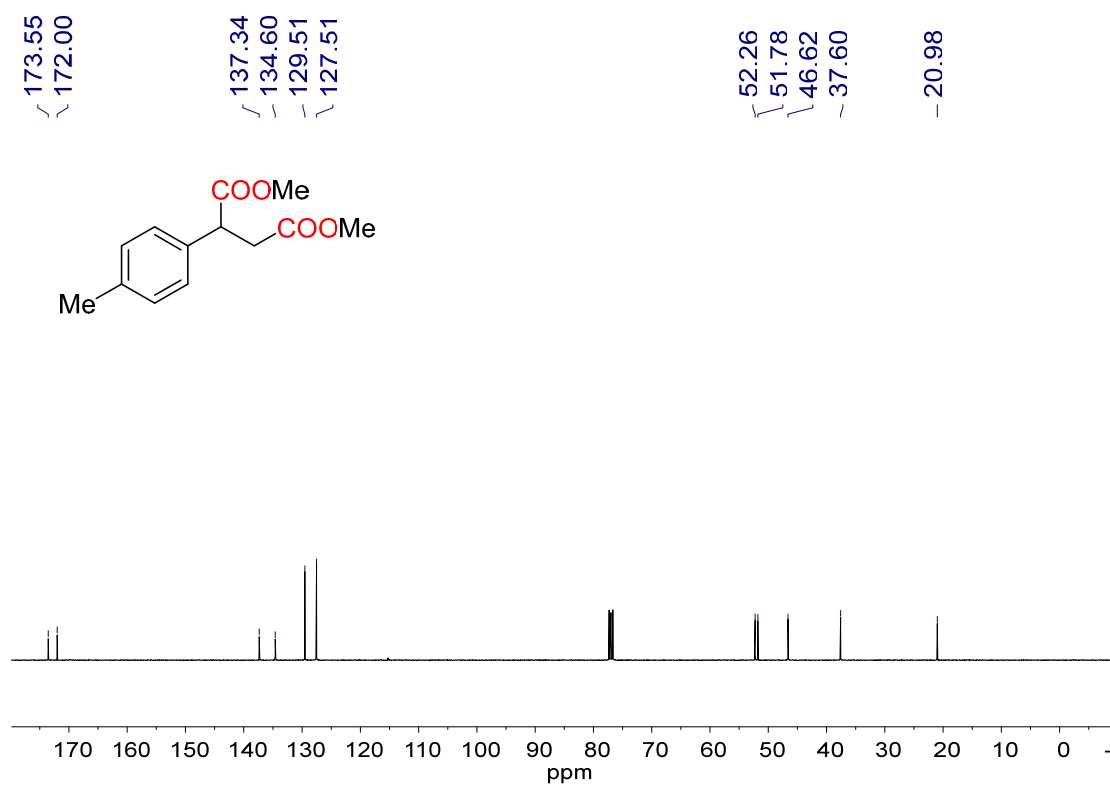

<sup>13</sup>C{<sup>1</sup>H} NMR spectrum (101 MHz, Chloroform-*d*) of 2b

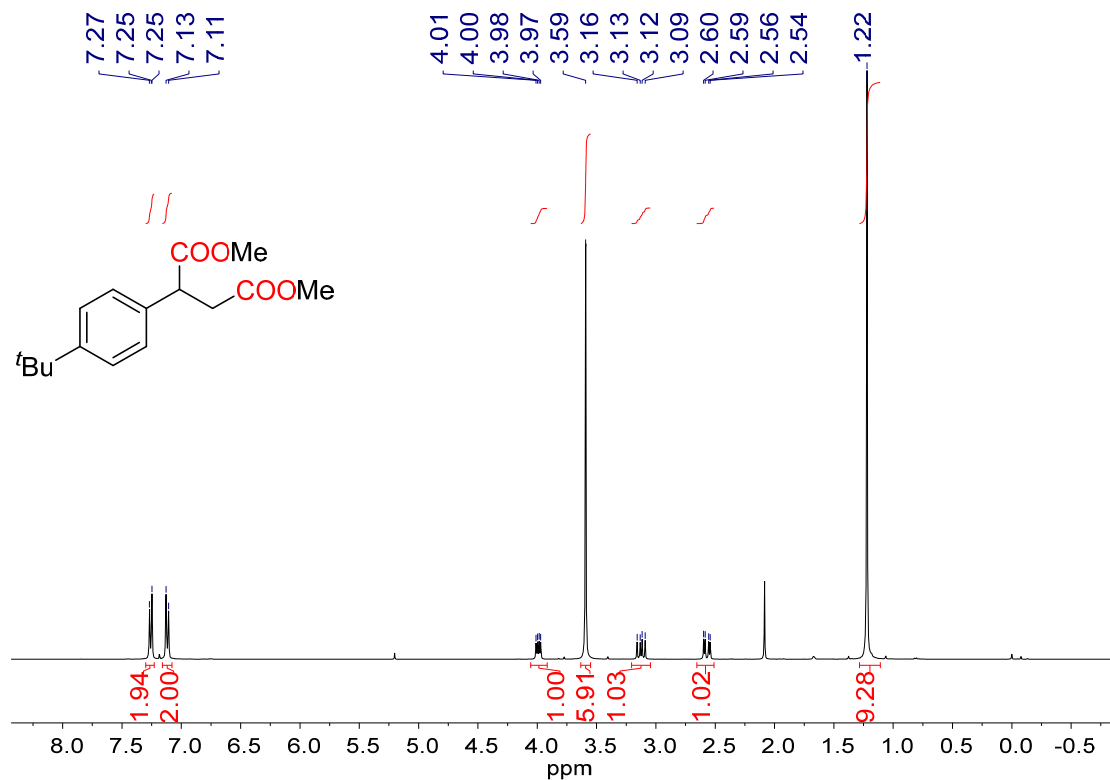

<sup>1</sup>H NMR spectrum (400 MHz, Chloroform-*d*) of 2c

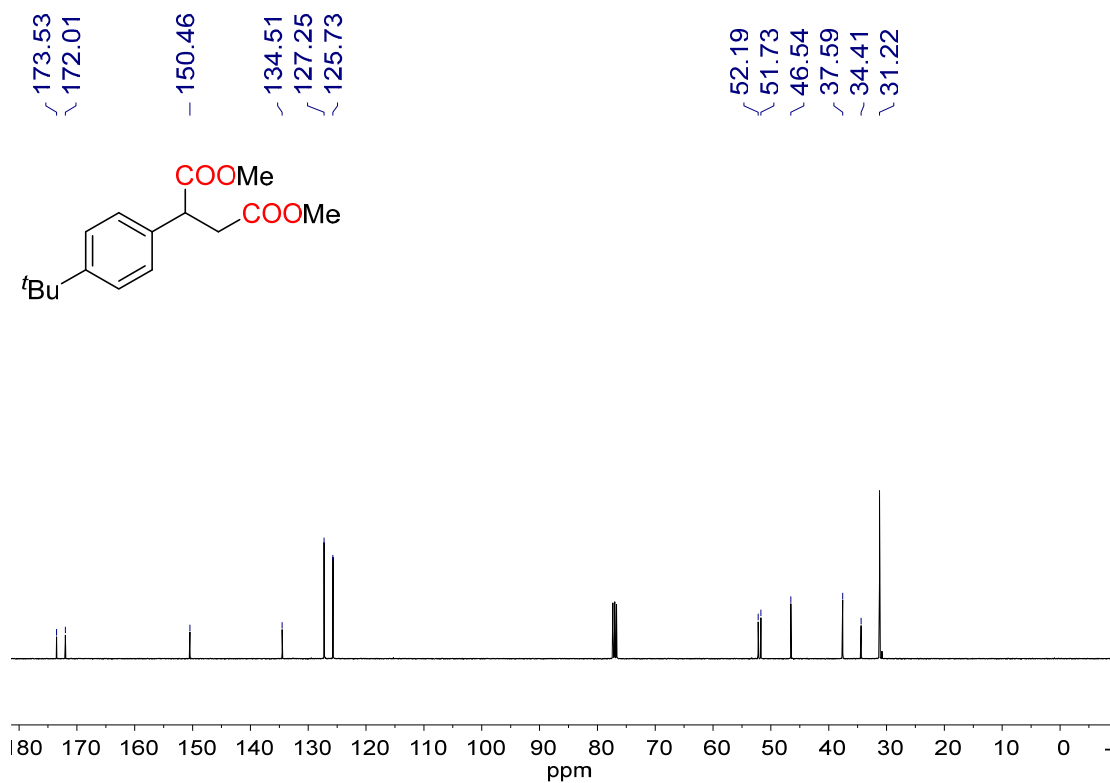

<sup>13</sup>C{<sup>1</sup>H} NMR spectrum (101 MHz, Chloroform-*d*) of 2c

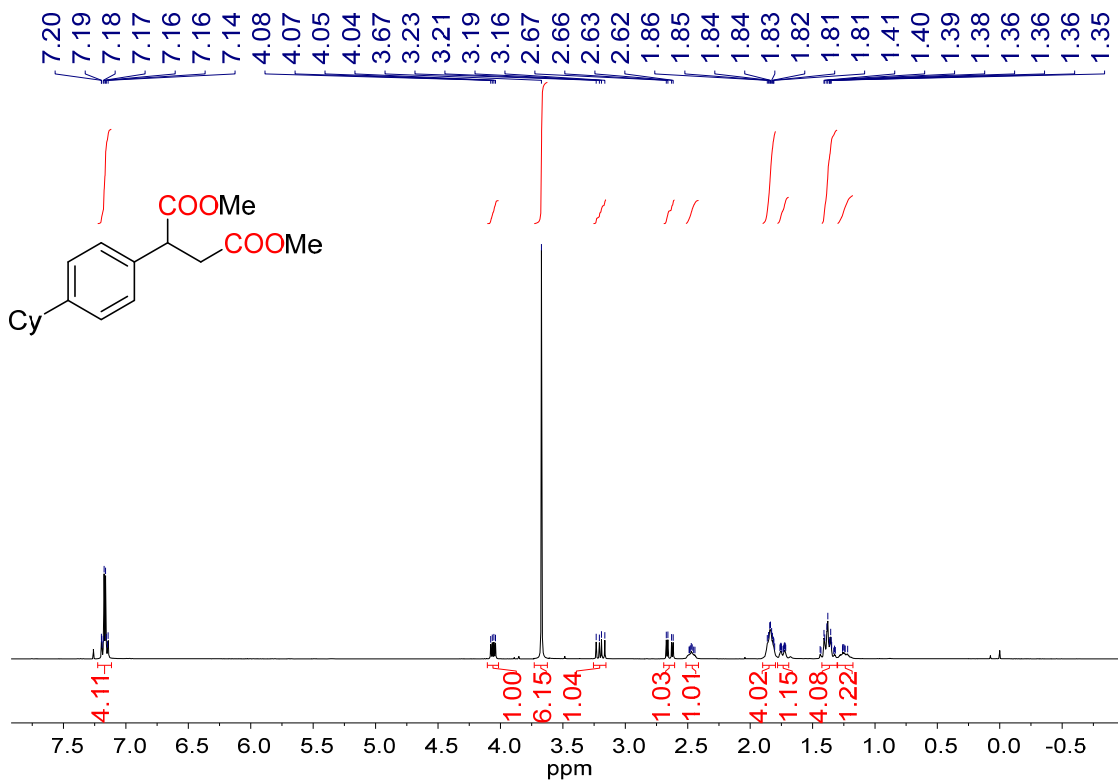

<sup>1</sup>H NMR spectrum (400 MHz, Chloroform-*d*) of 2d

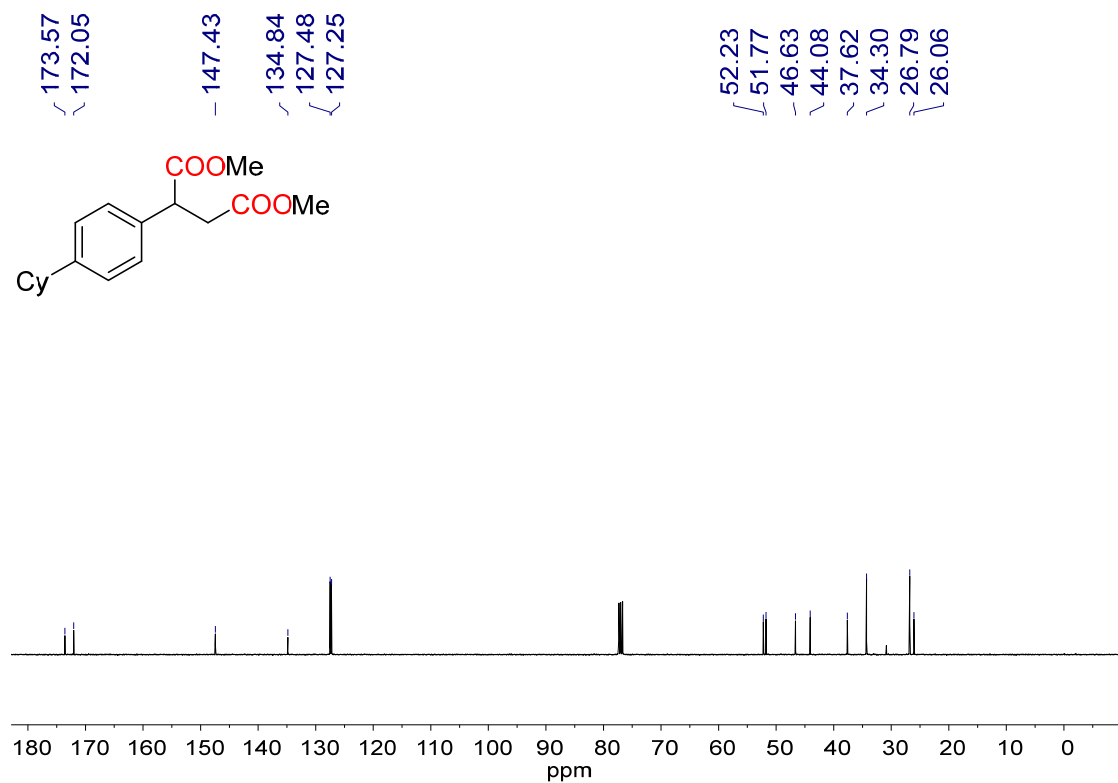

<sup>13</sup>C{<sup>1</sup>H} NMR spectrum (101 MHz, Chloroform-*d*) of 2d

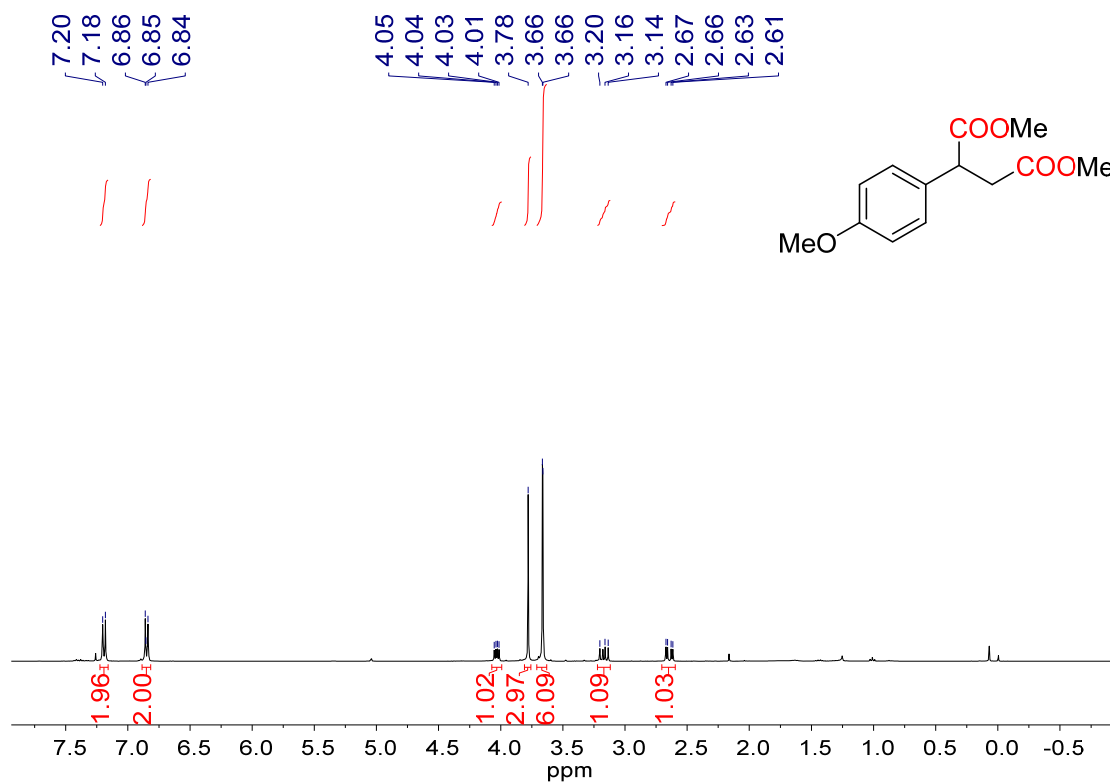

**<sup>1</sup>H NMR spectrum (400 MHz, Chloroform-*d*) of 2e**

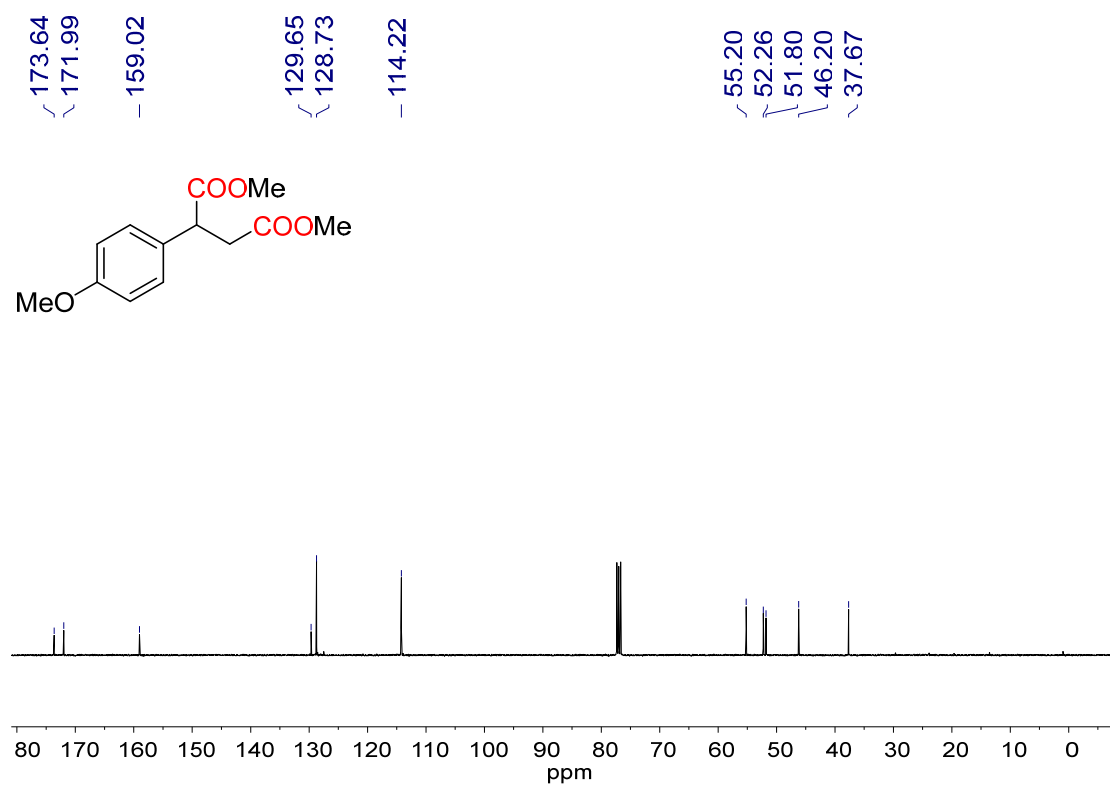

**<sup>13</sup>C{<sup>1</sup>H} NMR spectrum (101 MHz, Chloroform-*d*) of 2e**

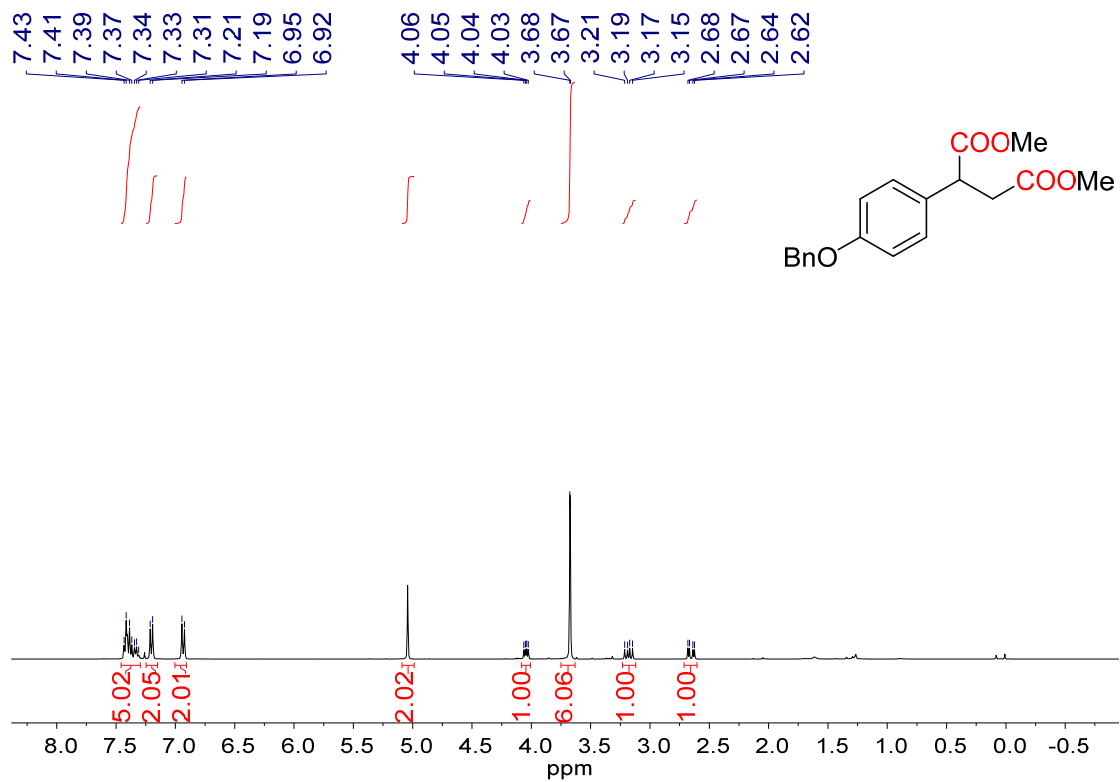

$^1\text{H}$  NMR spectrum (400 MHz, Chloroform-*d*) of 2f

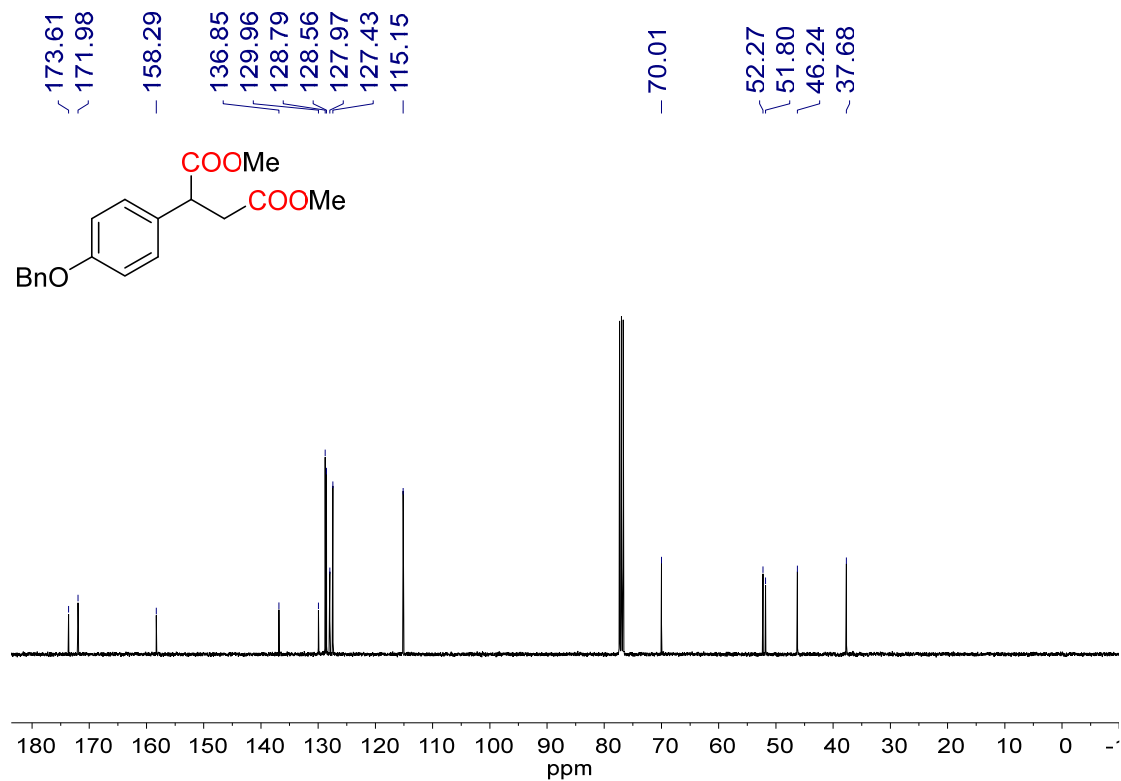

$^{13}\text{C}\{^1\text{H}\}$  NMR spectrum (101 MHz, Chloroform-*d*) of 2f



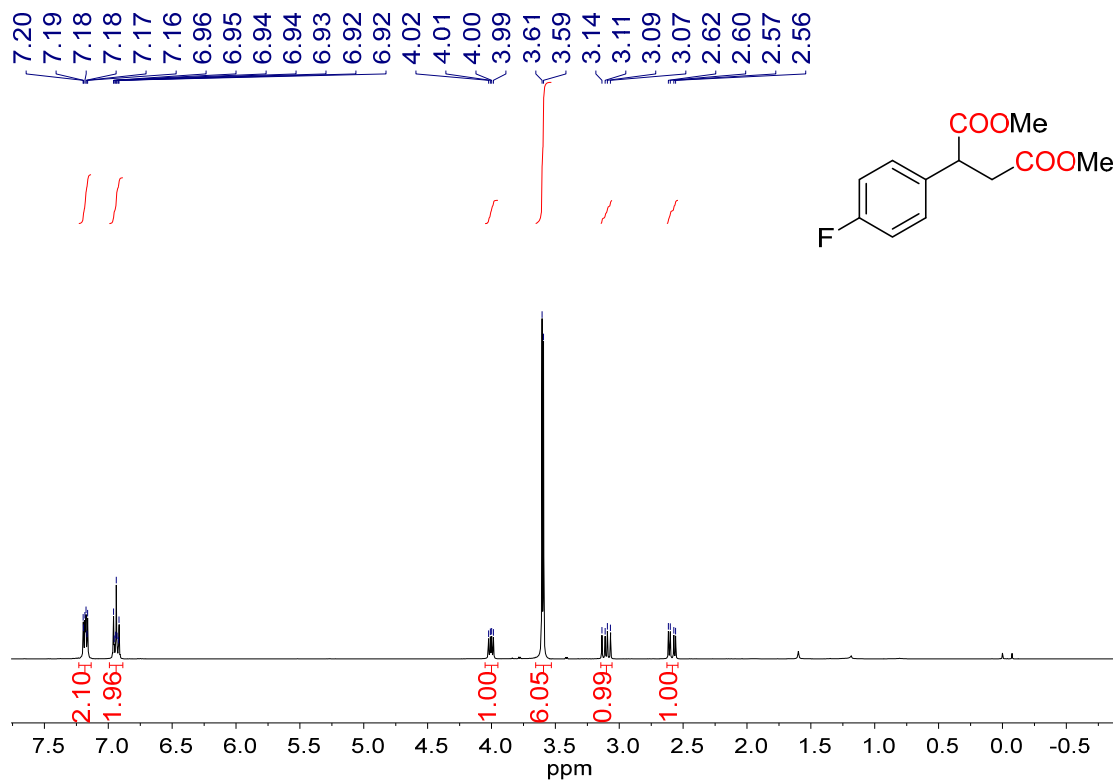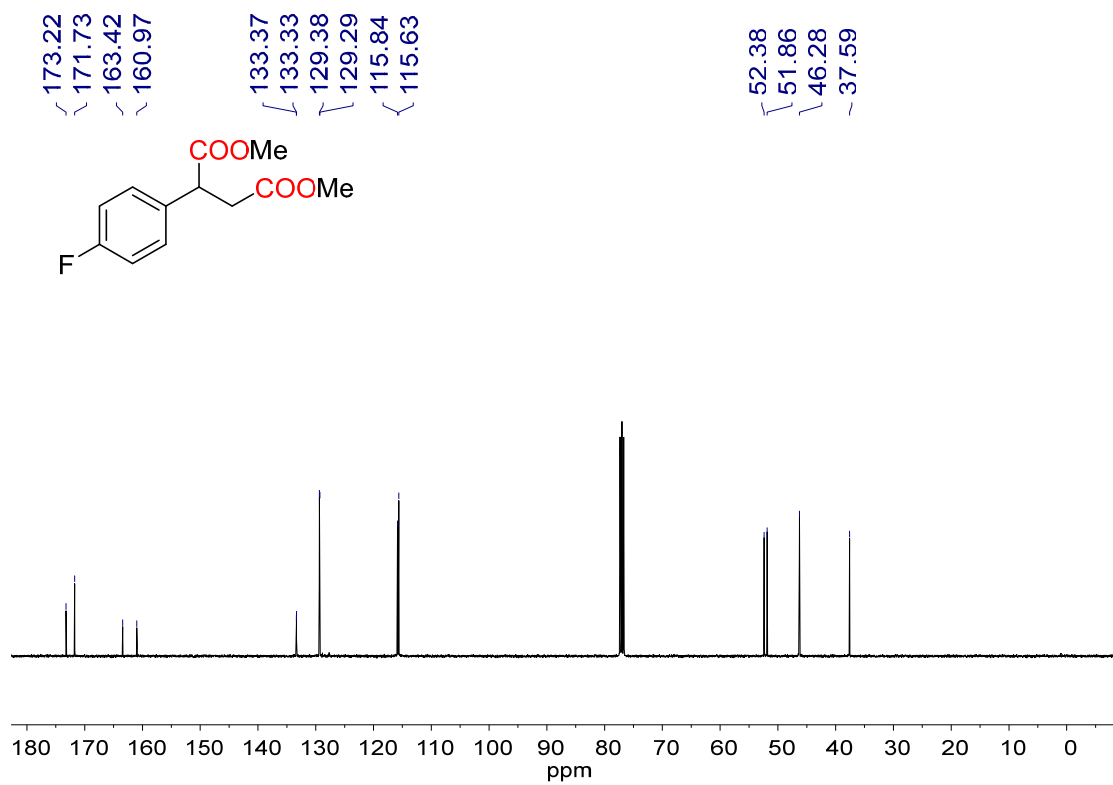

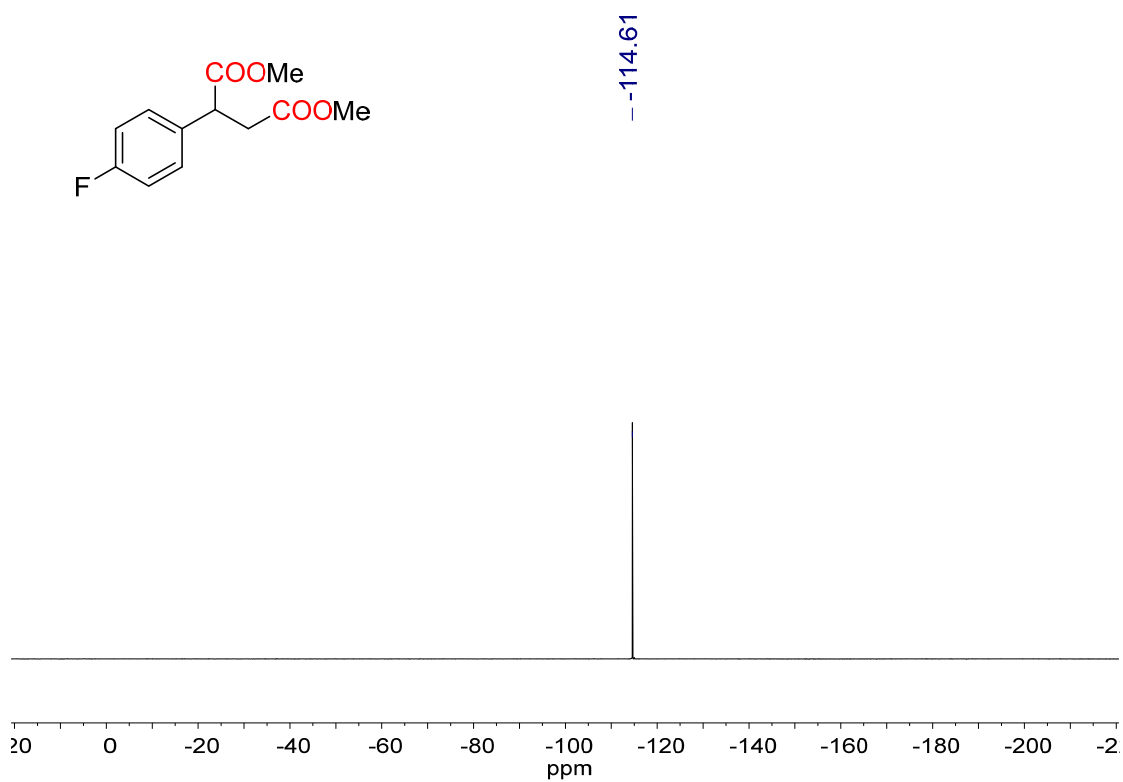

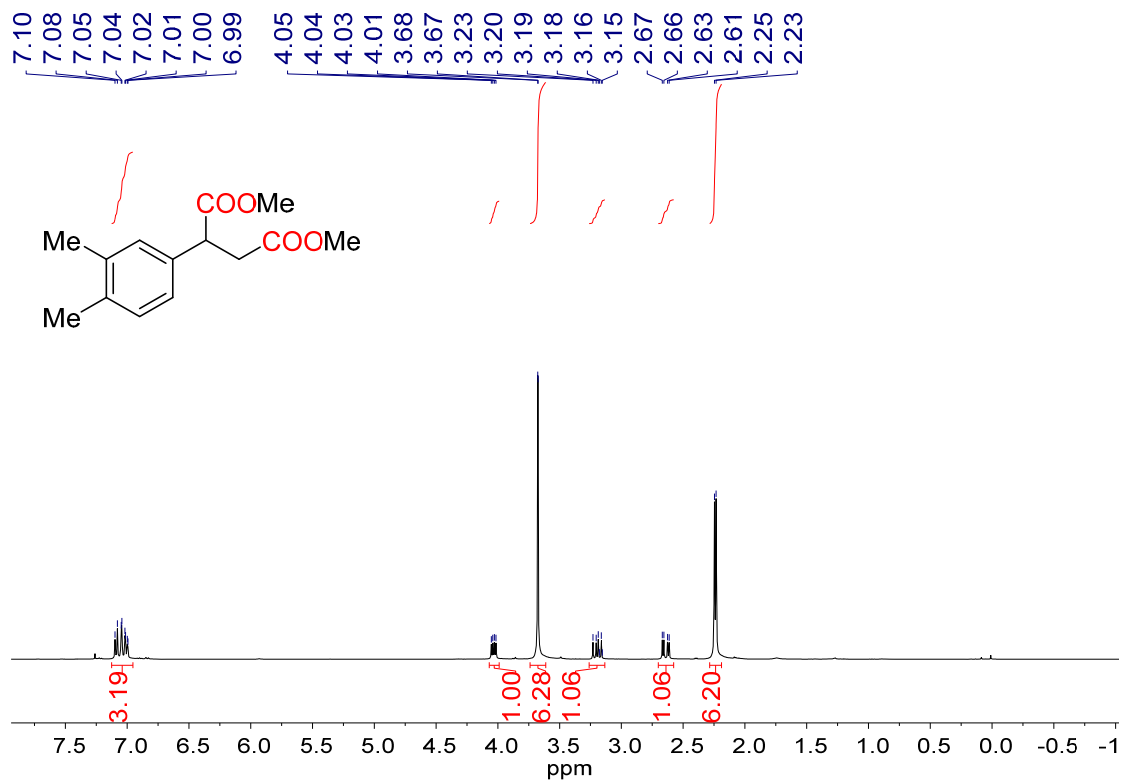

**<sup>1</sup>H NMR spectrum (400 MHz, Chloroform-*d*) of 2h**

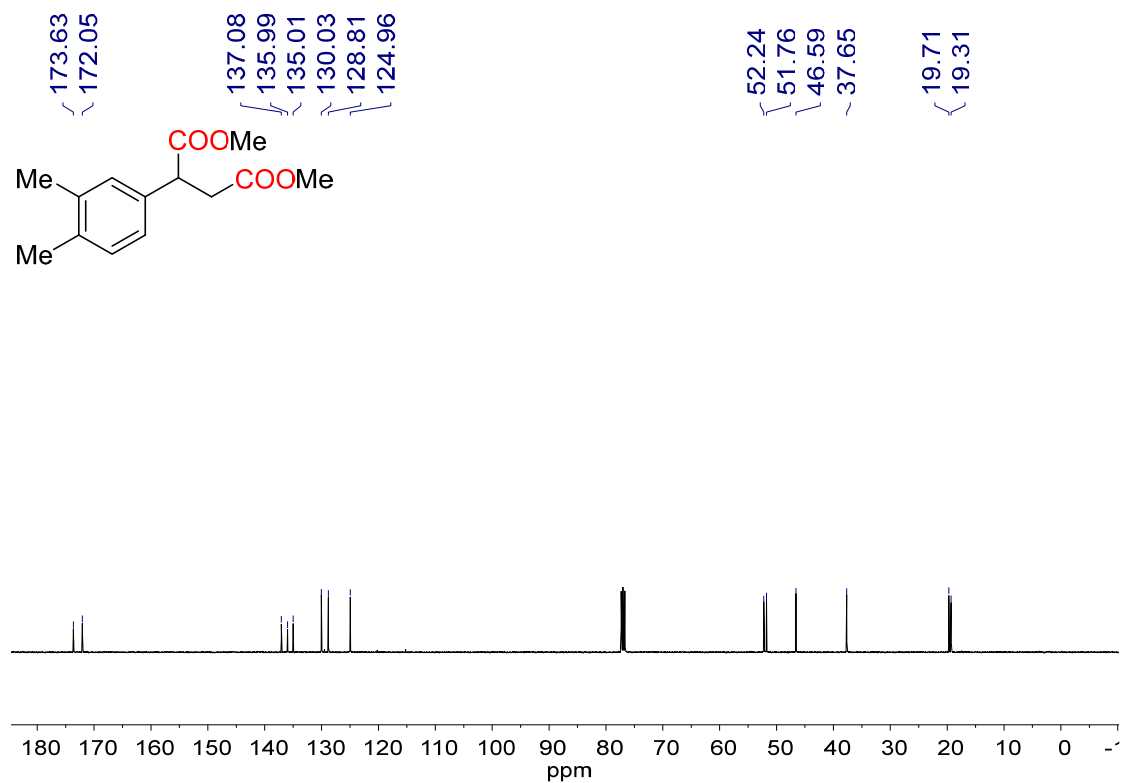

**<sup>13</sup>C{<sup>1</sup>H} NMR spectrum (101 MHz, Chloroform-*d*) of 2h**

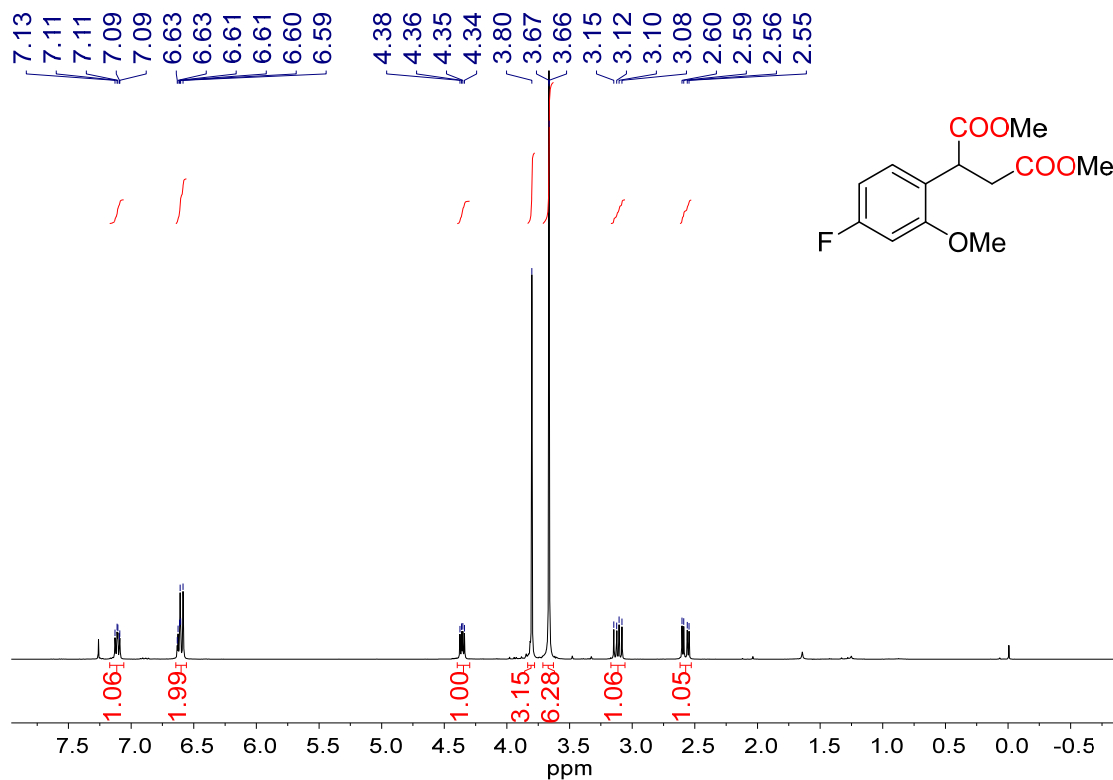

**$^1\text{H}$  NMR spectrum (400 MHz, Chloroform-*d*) of 2i**

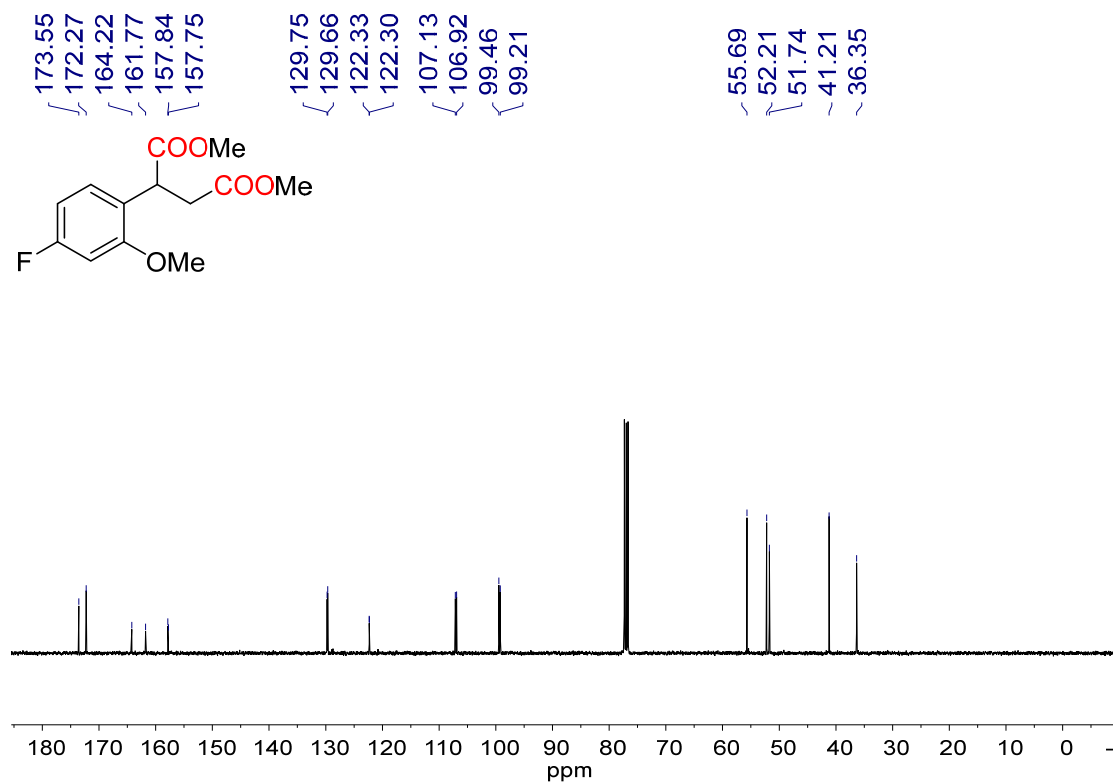

**$^{13}\text{C}\{^1\text{H}\}$  NMR spectrum (101 MHz, Chloroform-*d*) of 2i**

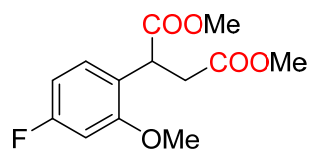

--116.60

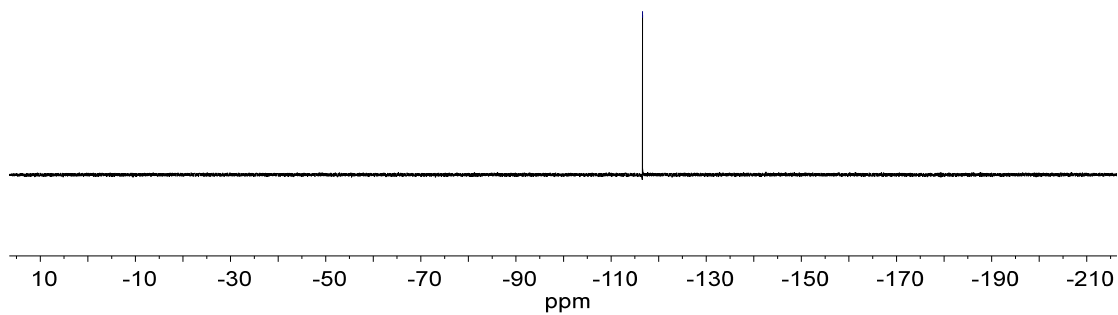

$^{19}\text{F}$  NMR spectrum (376 MHz, Chloroform-*d*) of 2i

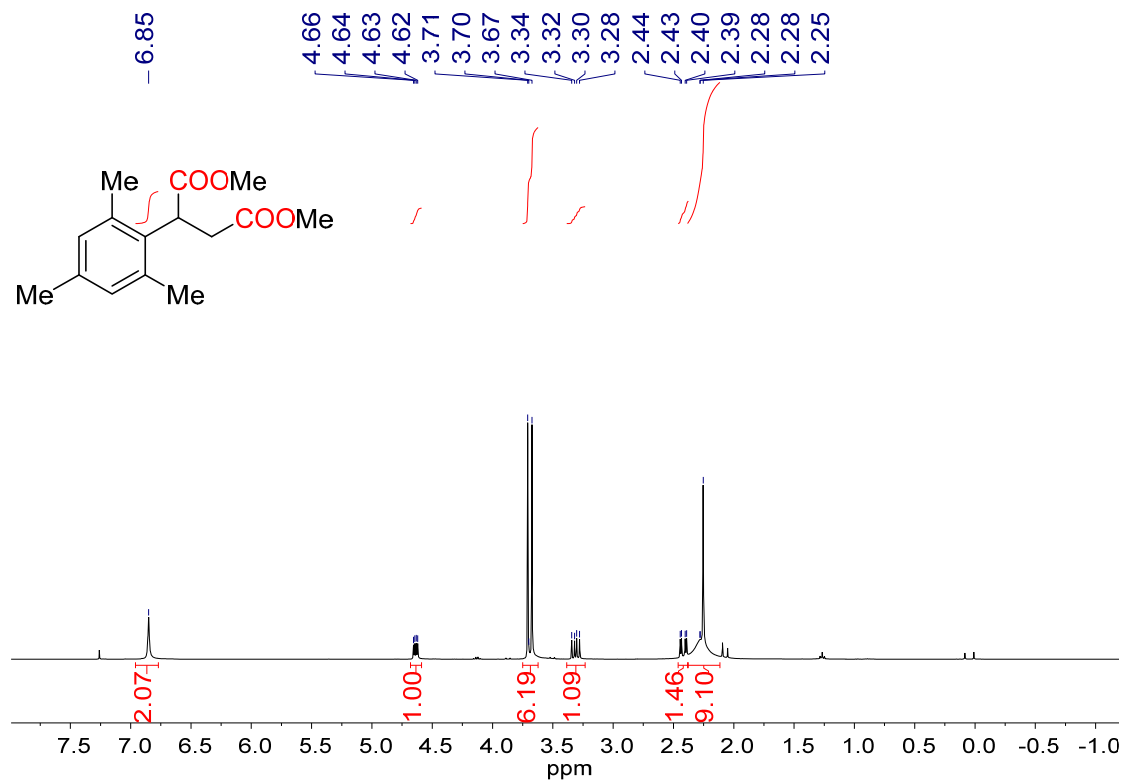

$^1\text{H}$  NMR spectrum (400 MHz, Chloroform-*d*) of 2j

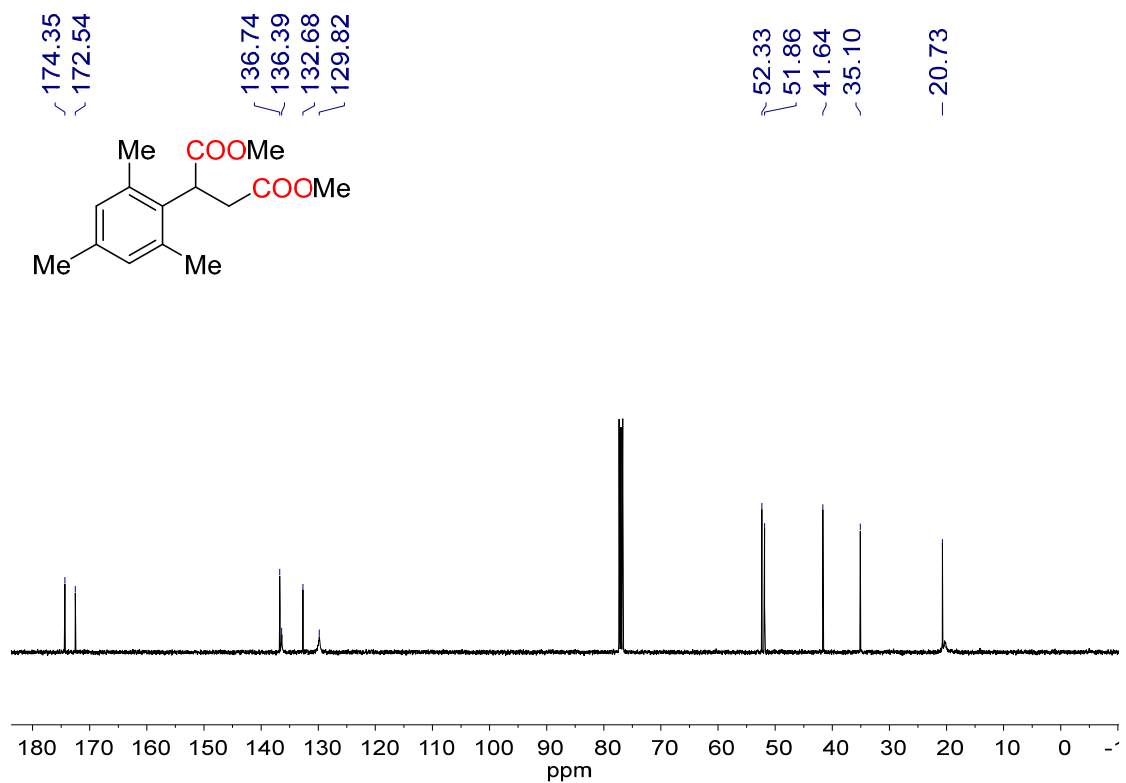

$^{13}\text{C}\{^1\text{H}\}$  NMR spectrum (101 MHz, Chloroform-*d*) of 2j

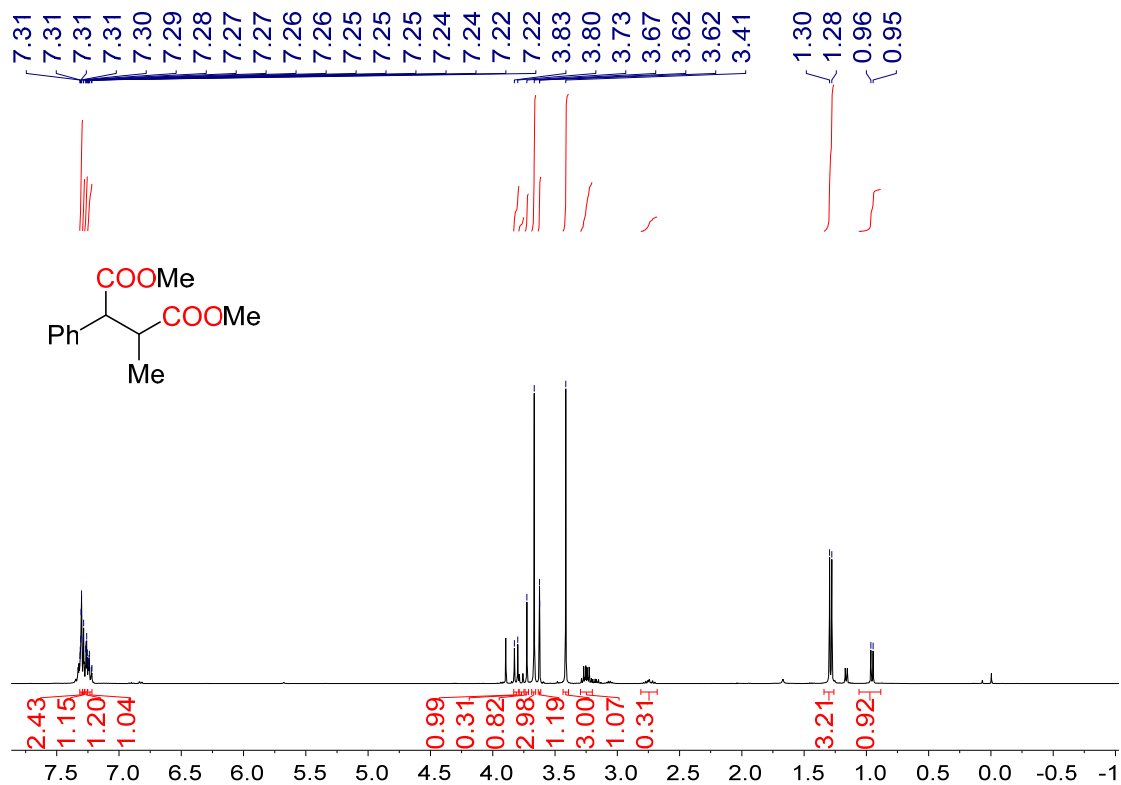

<sup>1</sup>H NMR spectrum (400 MHz, Chloroform-*d*) of 2k

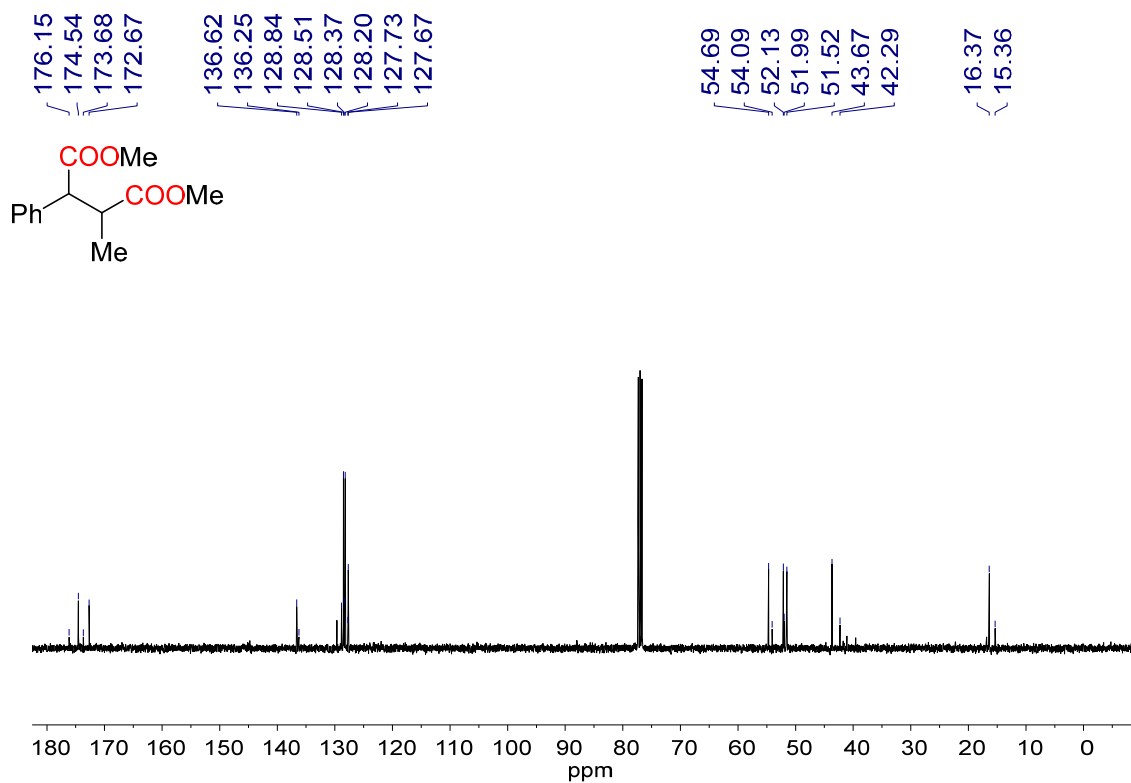

<sup>13</sup>C{<sup>1</sup>H} NMR spectrum (101 MHz, Chloroform-*d*) of 2k

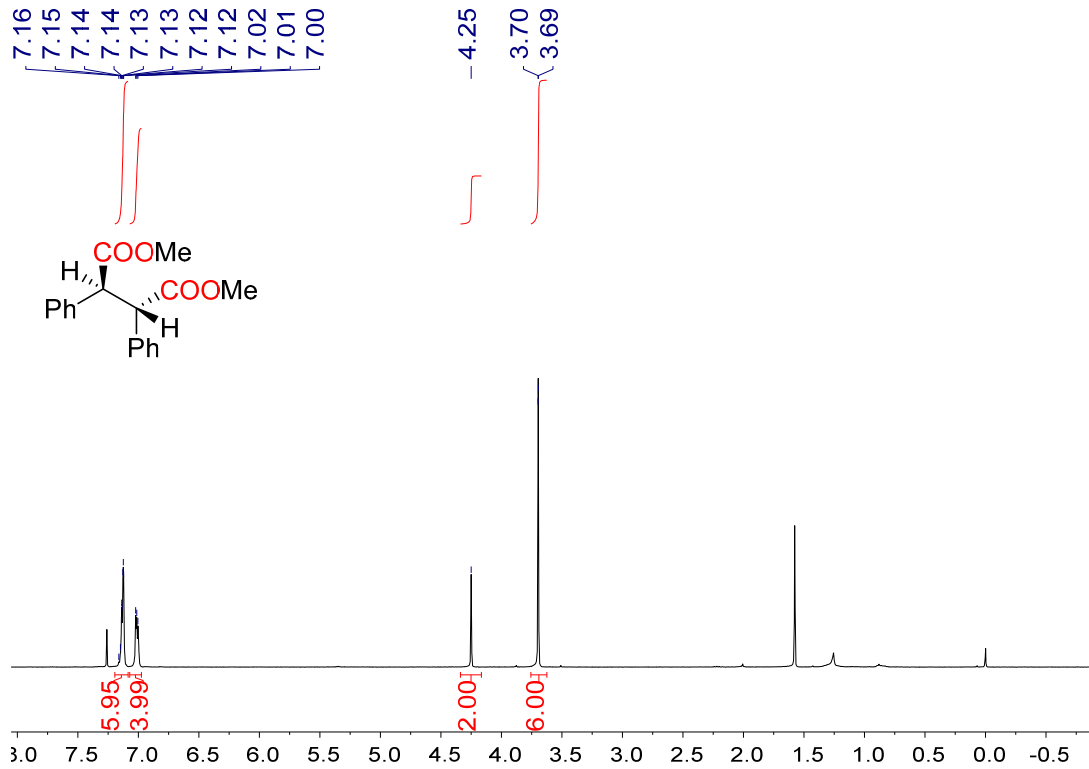

$^1\text{H}$  NMR spectrum (400 MHz, Chloroform-*d*) of *trans*-21

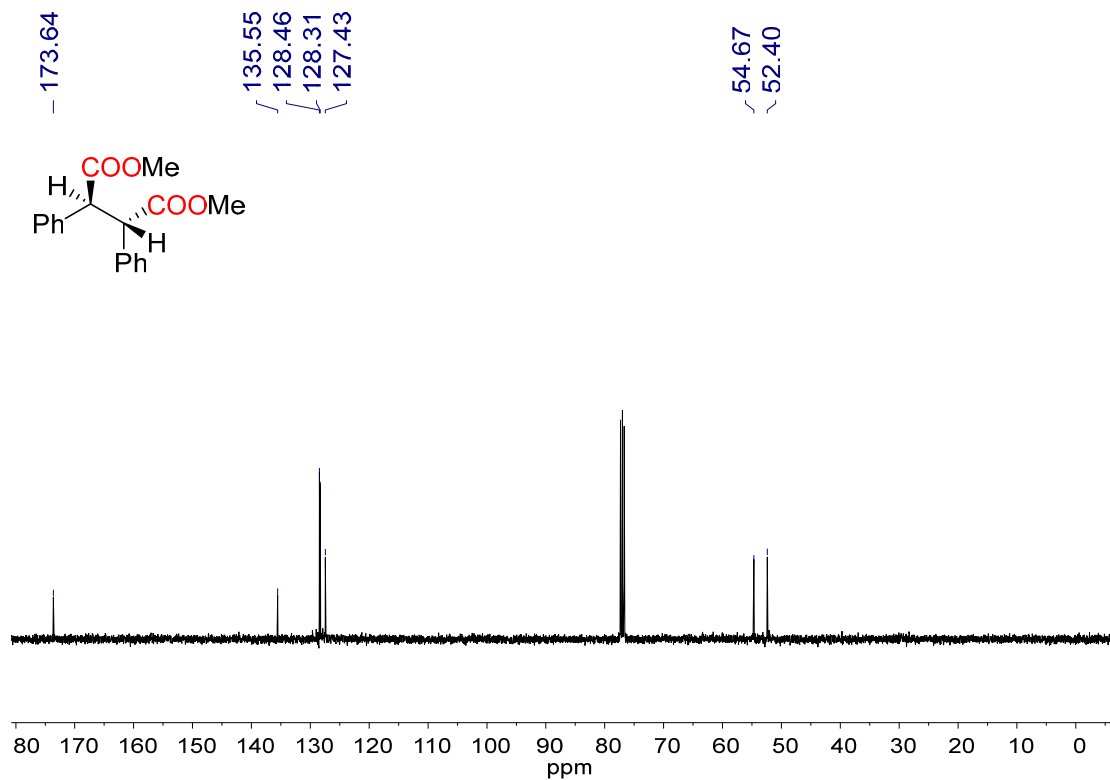

$^{13}\text{C}\{^1\text{H}\}$  NMR spectrum (101 MHz, Chloroform-*d*) of *trans*-21



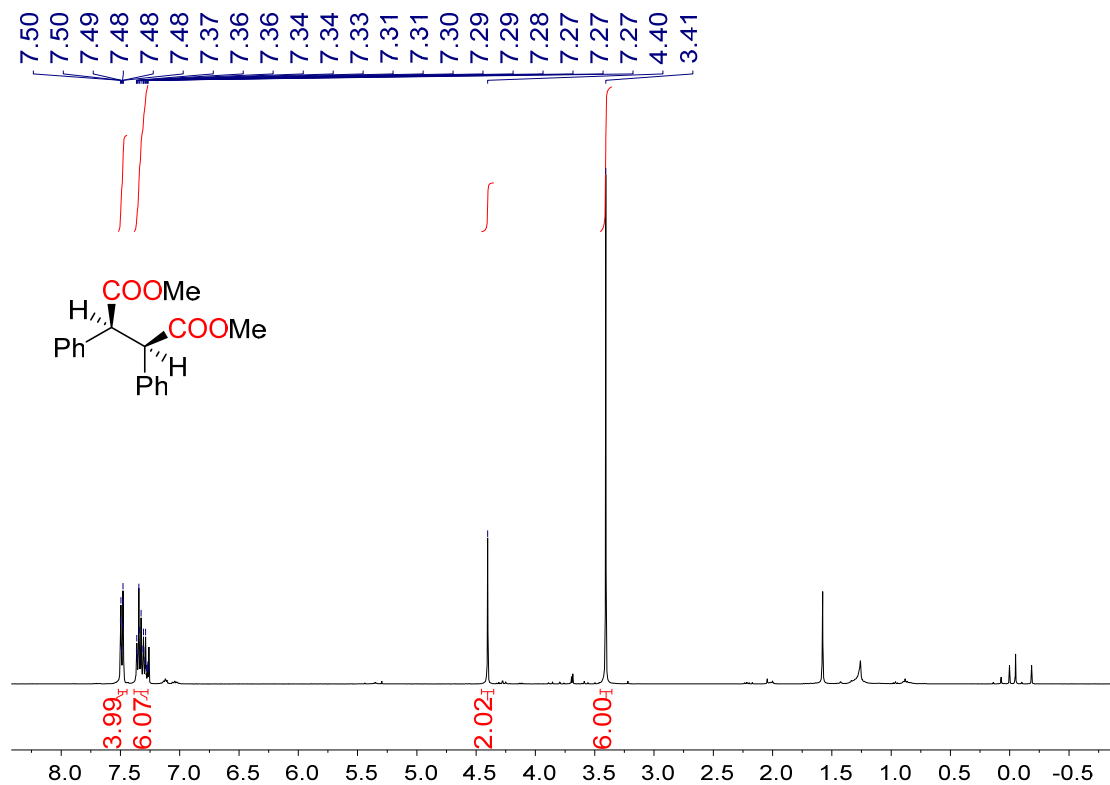

$^1\text{H}$  NMR spectrum (400 MHz, Chloroform-*d*) of *cis*-21

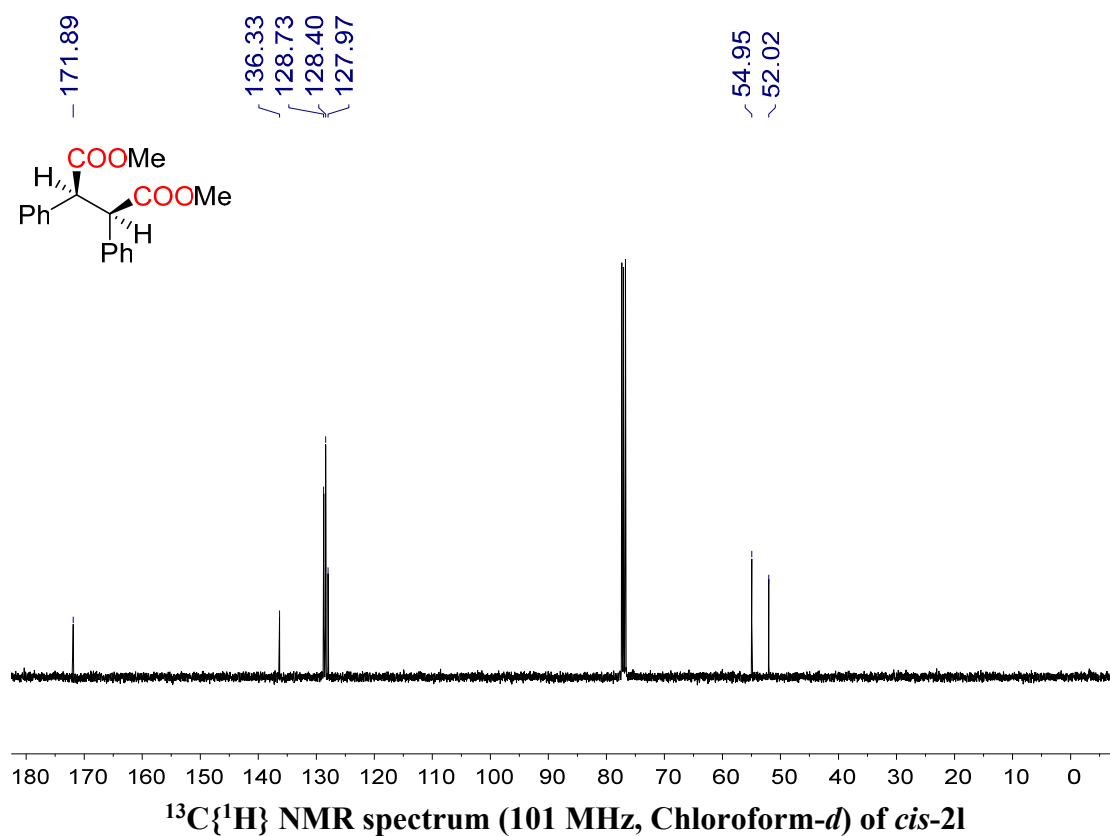

$^{13}\text{C}\{^1\text{H}\}$  NMR spectrum (101 MHz, Chloroform-*d*) of *cis*-21

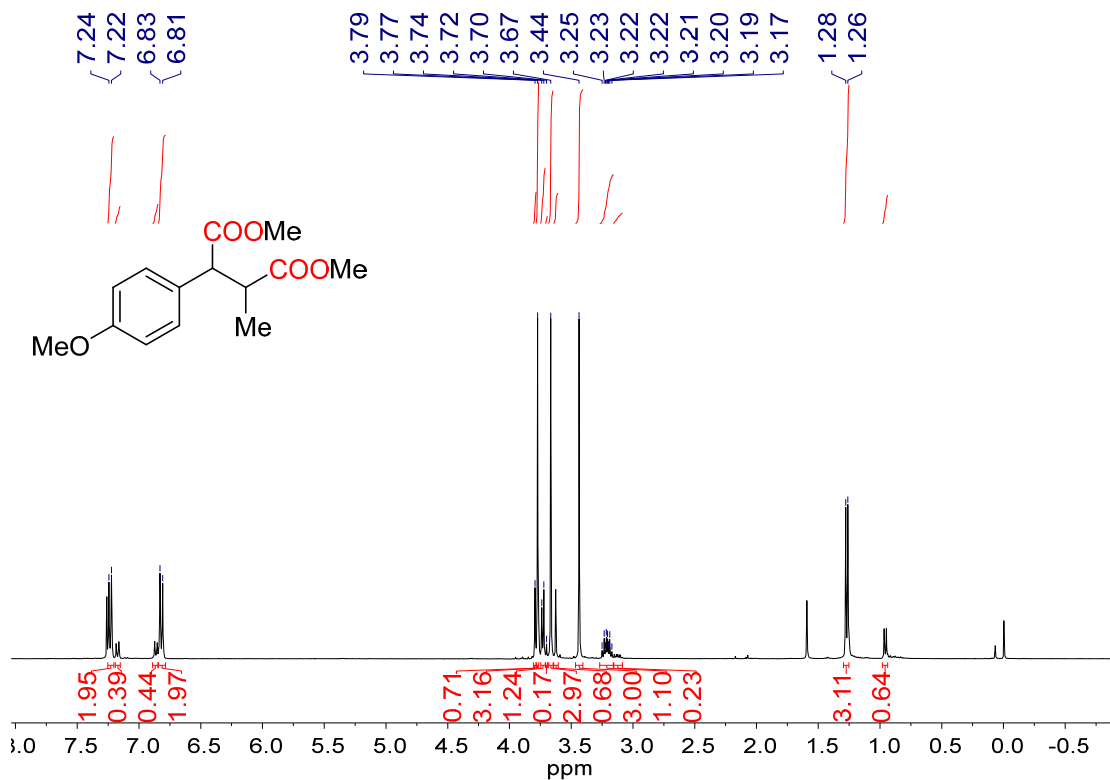

<sup>1</sup>H NMR spectrum (400 MHz, Chloroform-*d*) of 2m

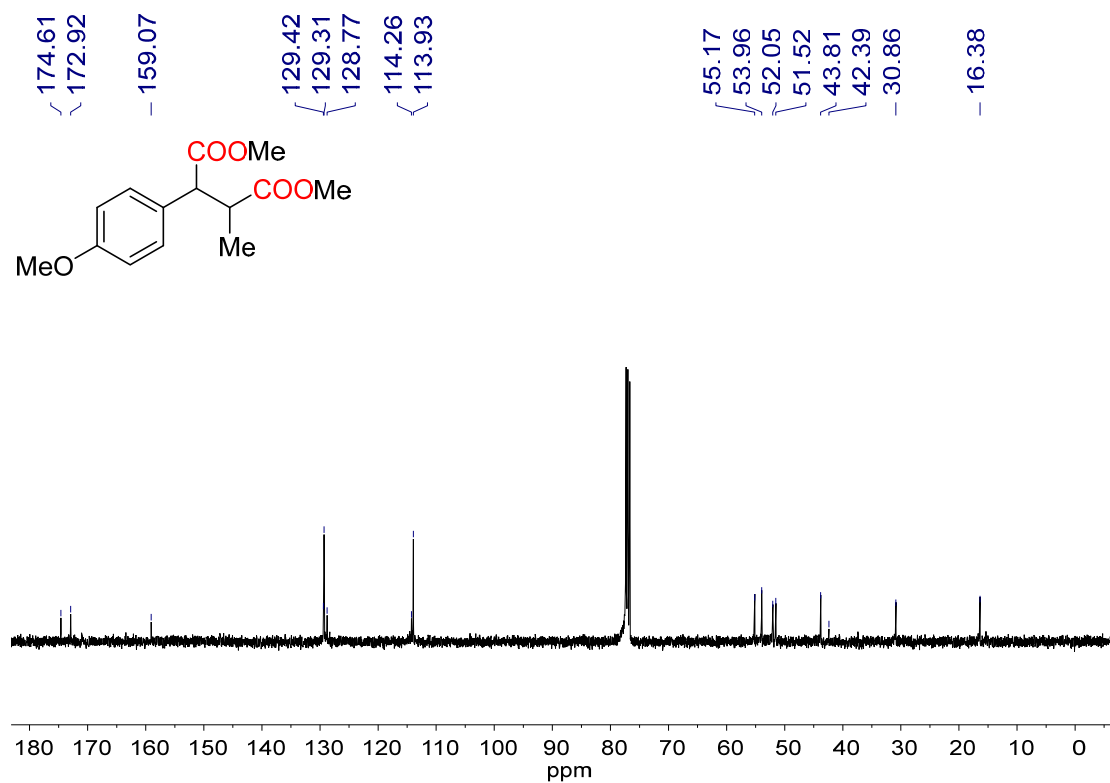

<sup>13</sup>C NMR spectrum (101 MHz, Chloroform-*d*) of 2m

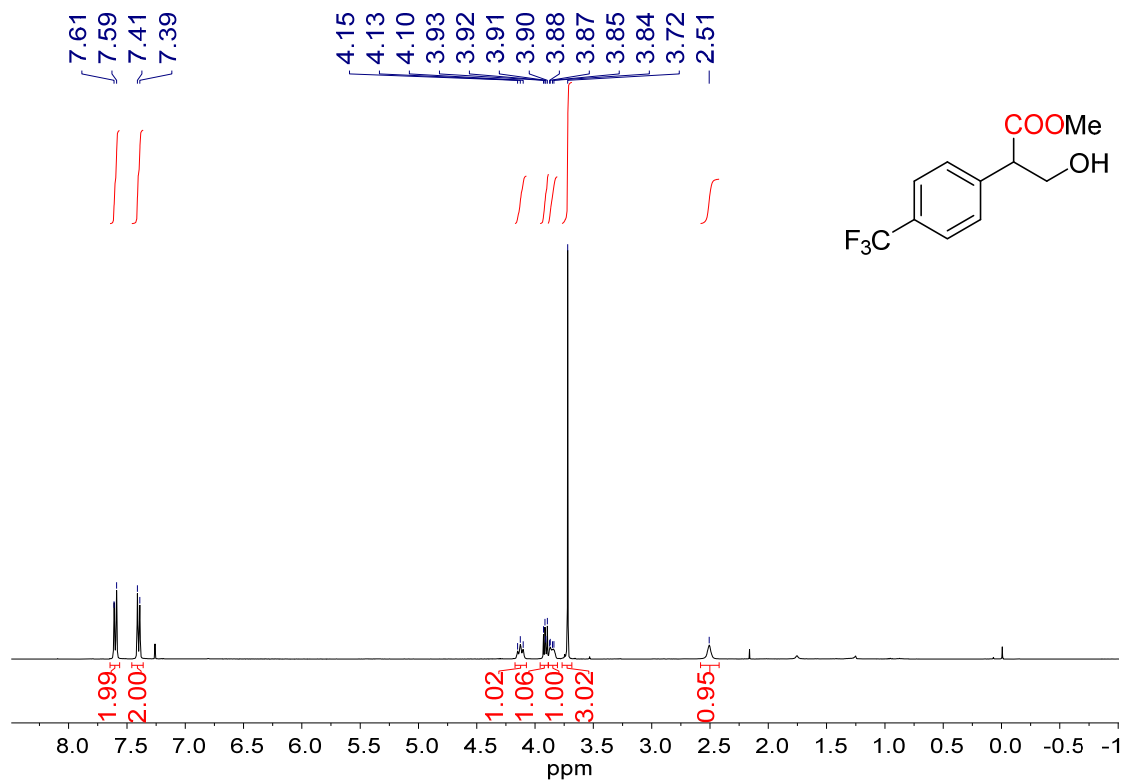

$^1\text{H}$  NMR spectrum (400 MHz, Chloroform-*d*) of 3n

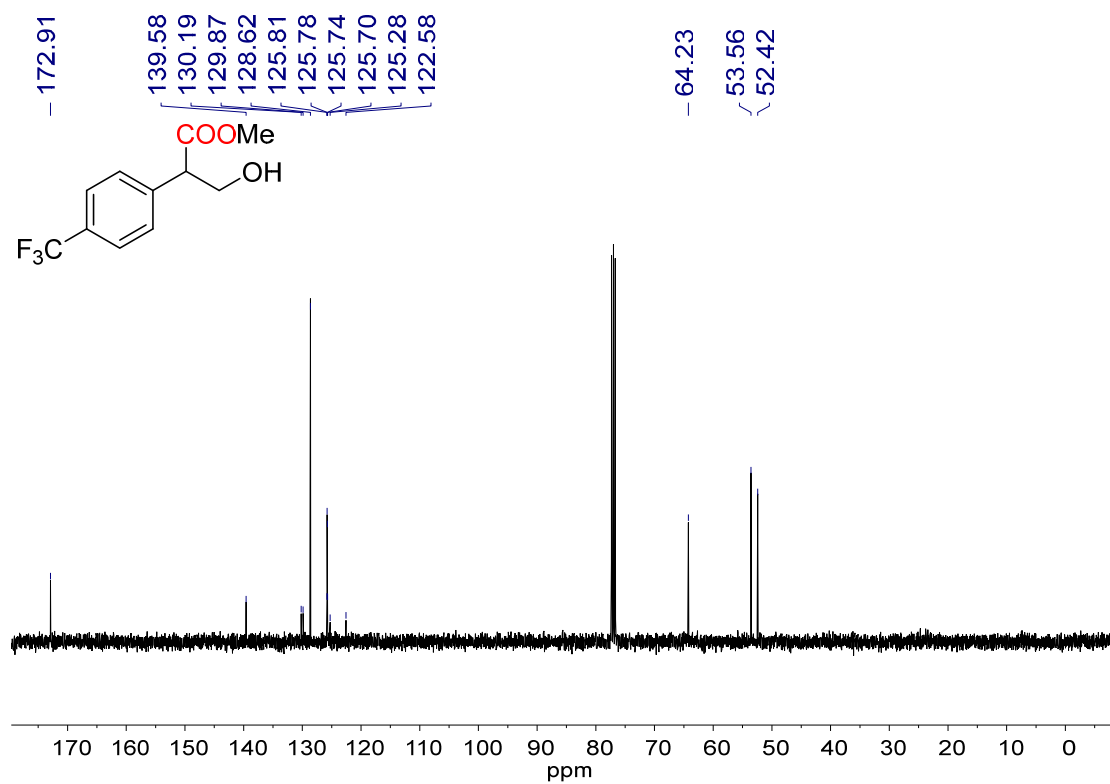

$^{13}\text{C}\{^1\text{H}\}$  NMR spectrum (101 MHz, Chloroform-*d*) of 3n

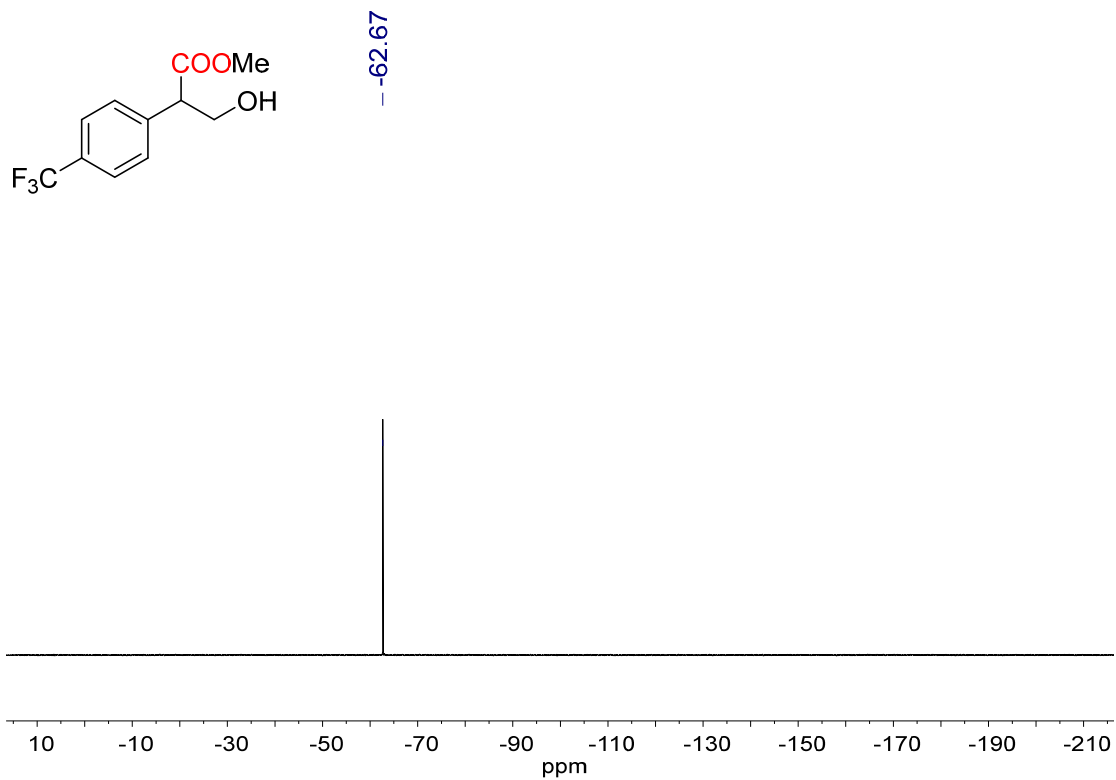

**<sup>19</sup>F NMR spectrum (376 MHz, Chloroform-*d*) of 3n**

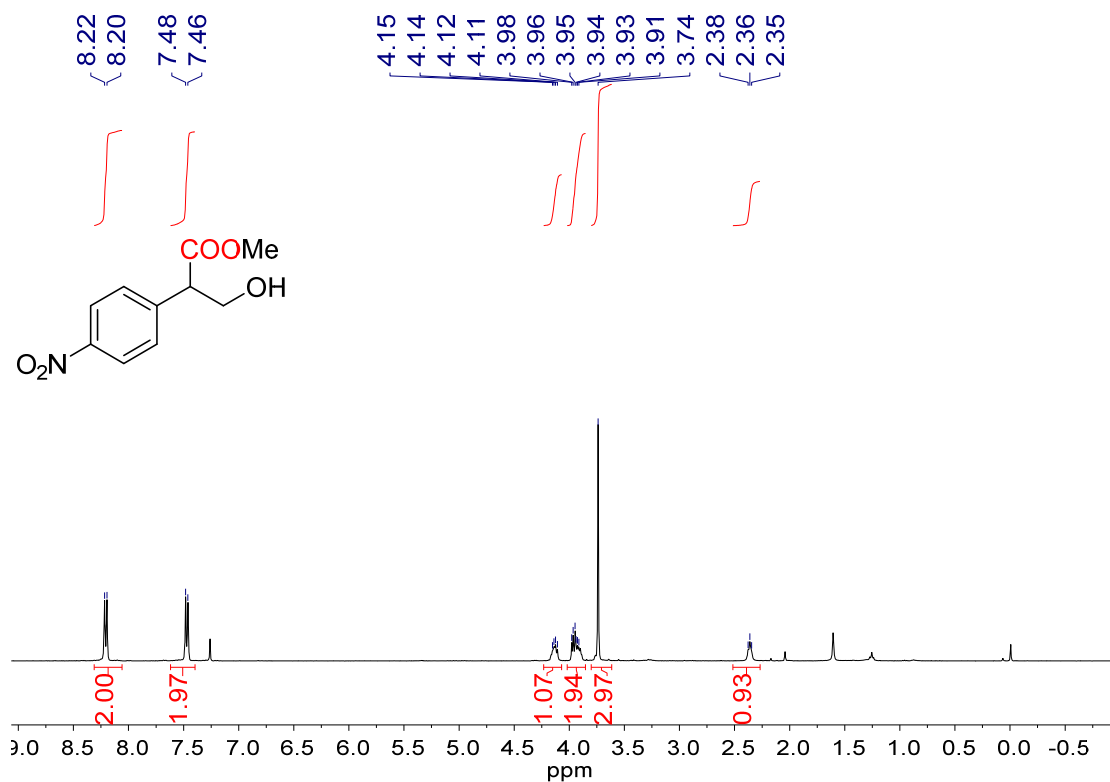

**<sup>1</sup>H NMR spectrum (400 MHz, Chloroform-*d*) of 3o**

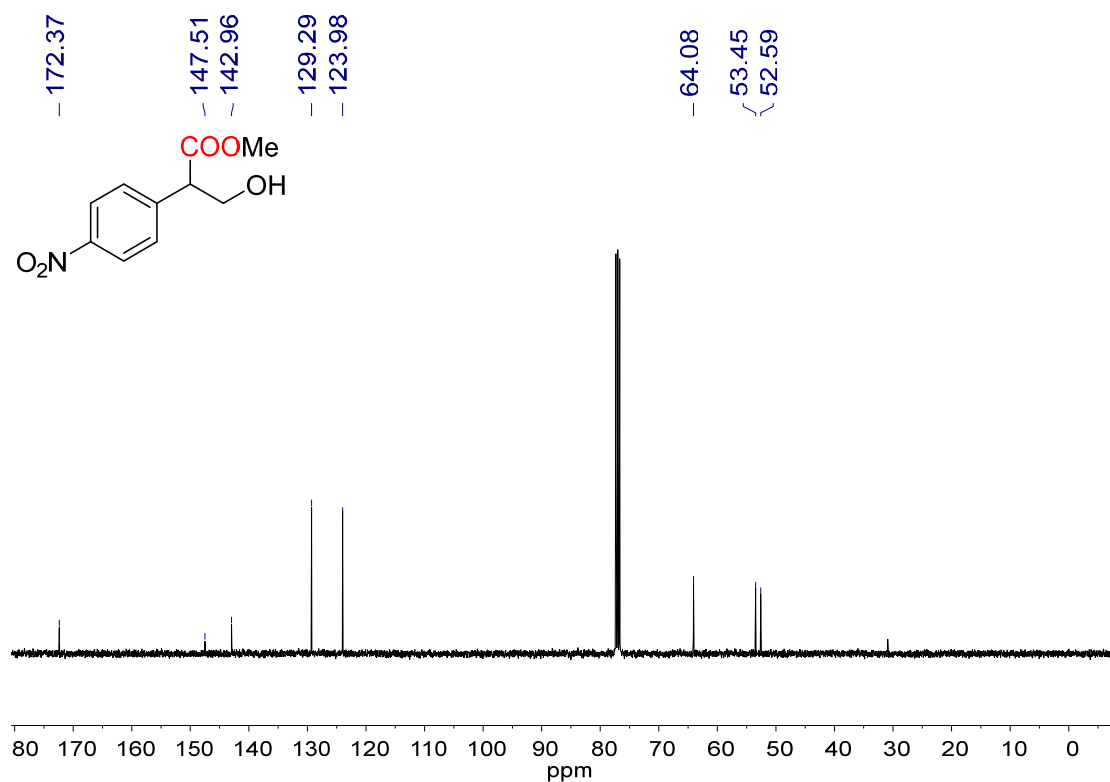

**<sup>13</sup>C{<sup>1</sup>H} NMR spectrum (101 MHz, Chloroform-*d*) of 3o**

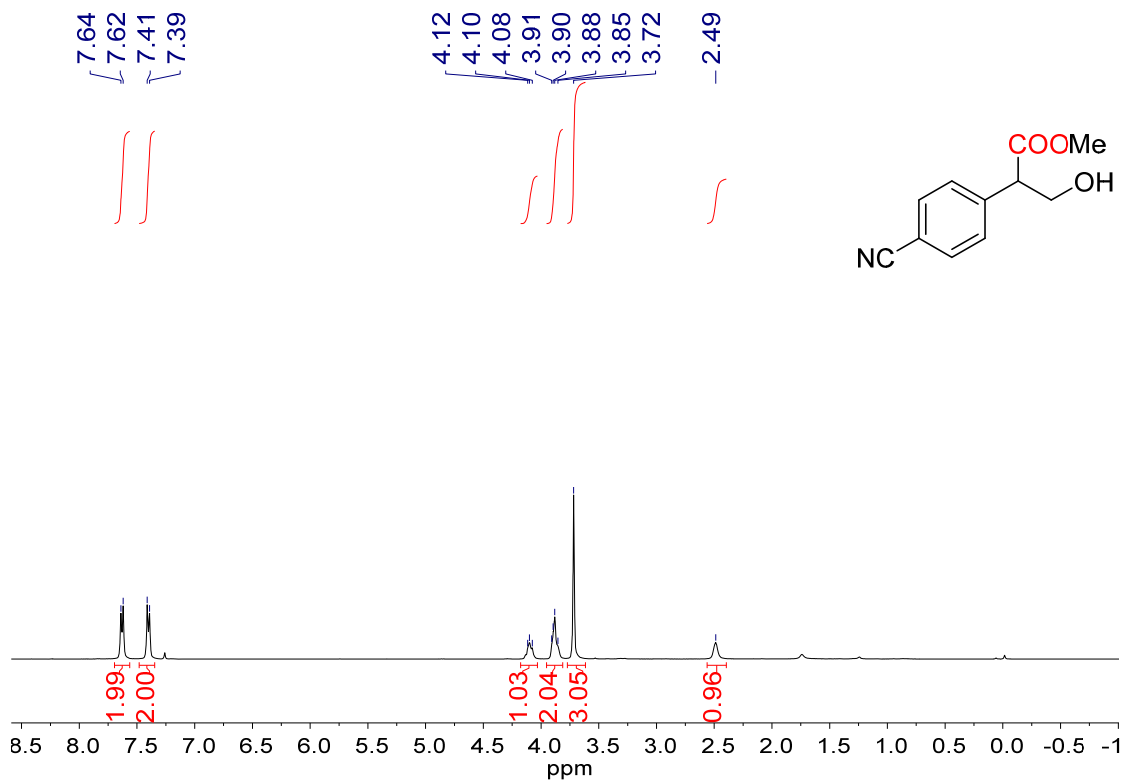

**<sup>1</sup>H NMR spectrum (400 MHz, Chloroform-*d*) of 3p**

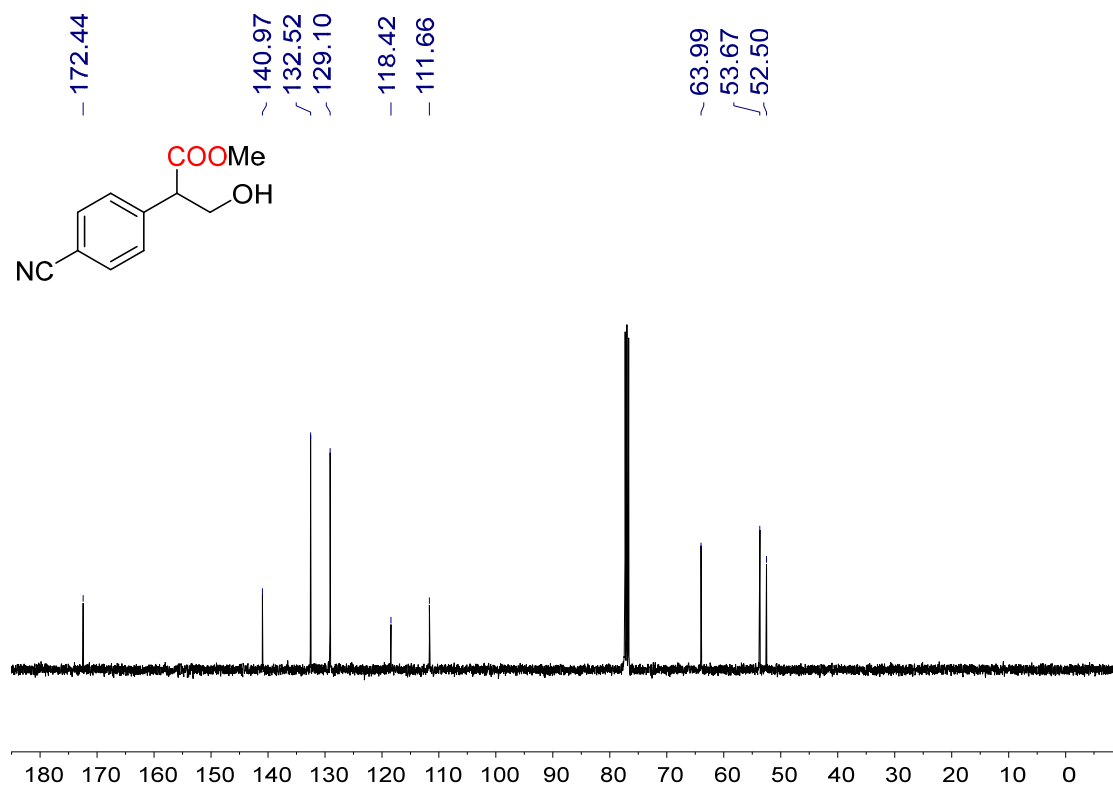

**<sup>13</sup>C{<sup>1</sup>H} NMR spectrum (101 MHz, Chloroform-*d*) of 3p**

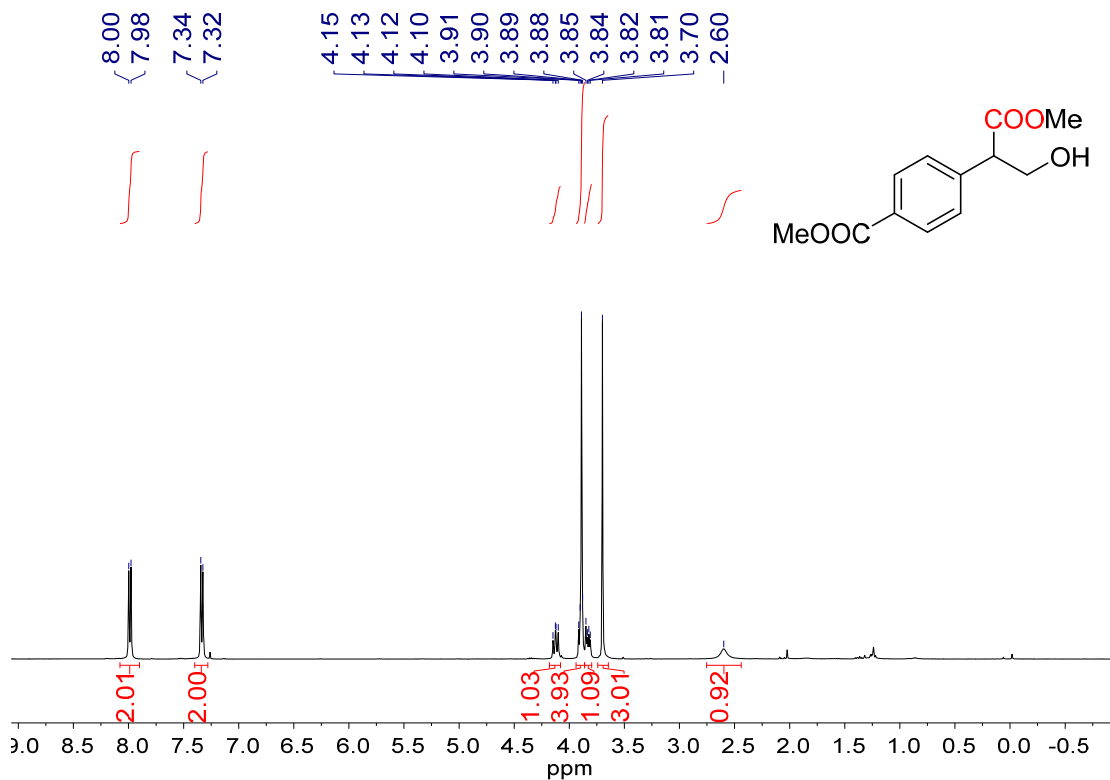

$^1\text{H}$  NMR spectrum (400 MHz, Chloroform-*d*) of 3q

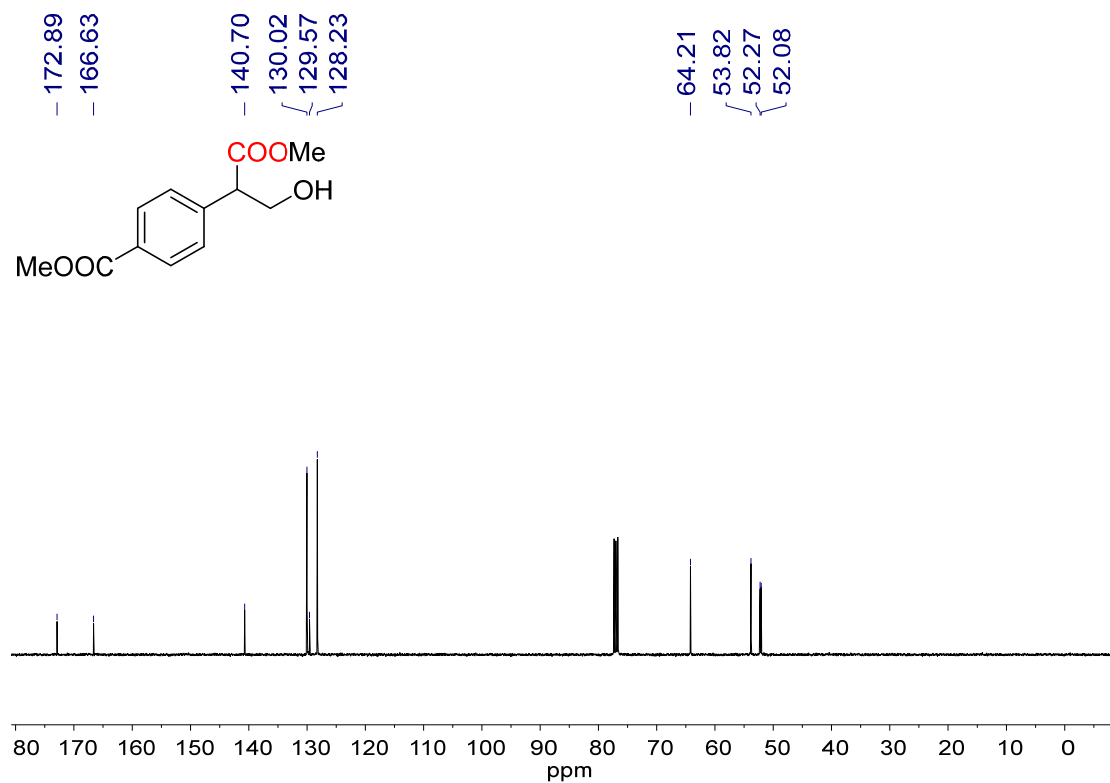

$^{13}\text{C}\{^1\text{H}\}$  NMR spectrum (101 MHz, Chloroform-*d*) of 3q

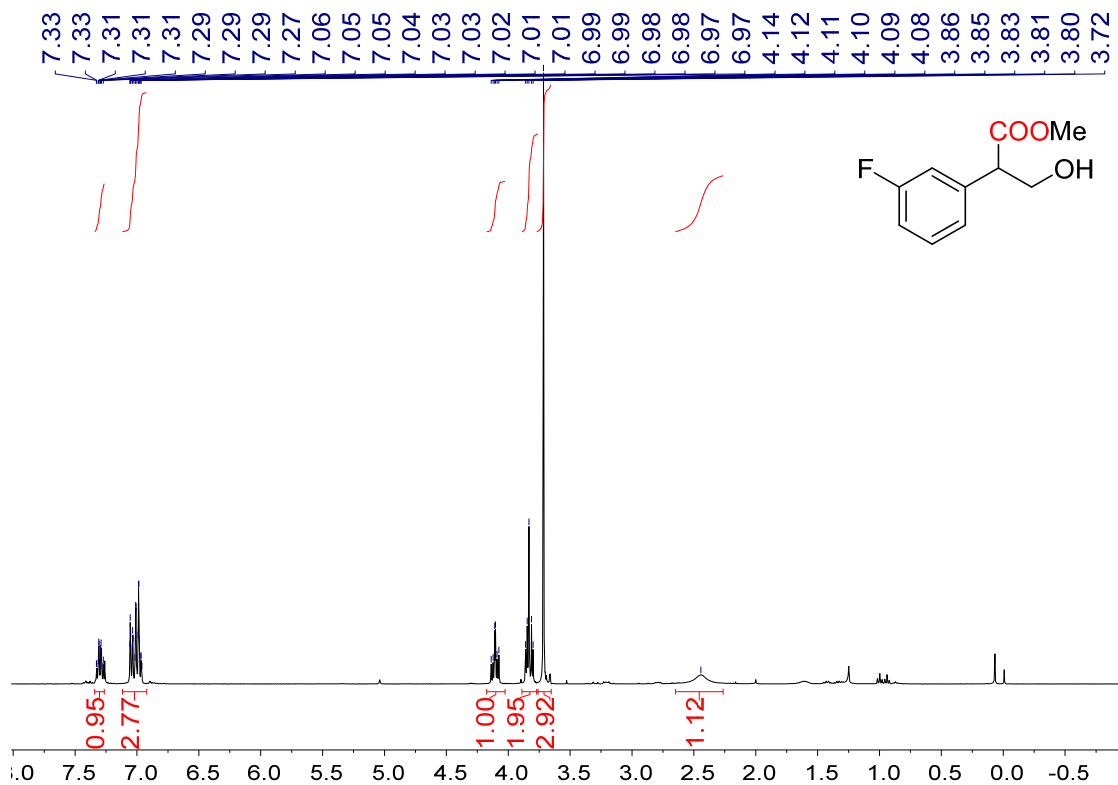

**<sup>1</sup>H NMR spectrum (400 MHz, Chloroform-*d*) of 3r**

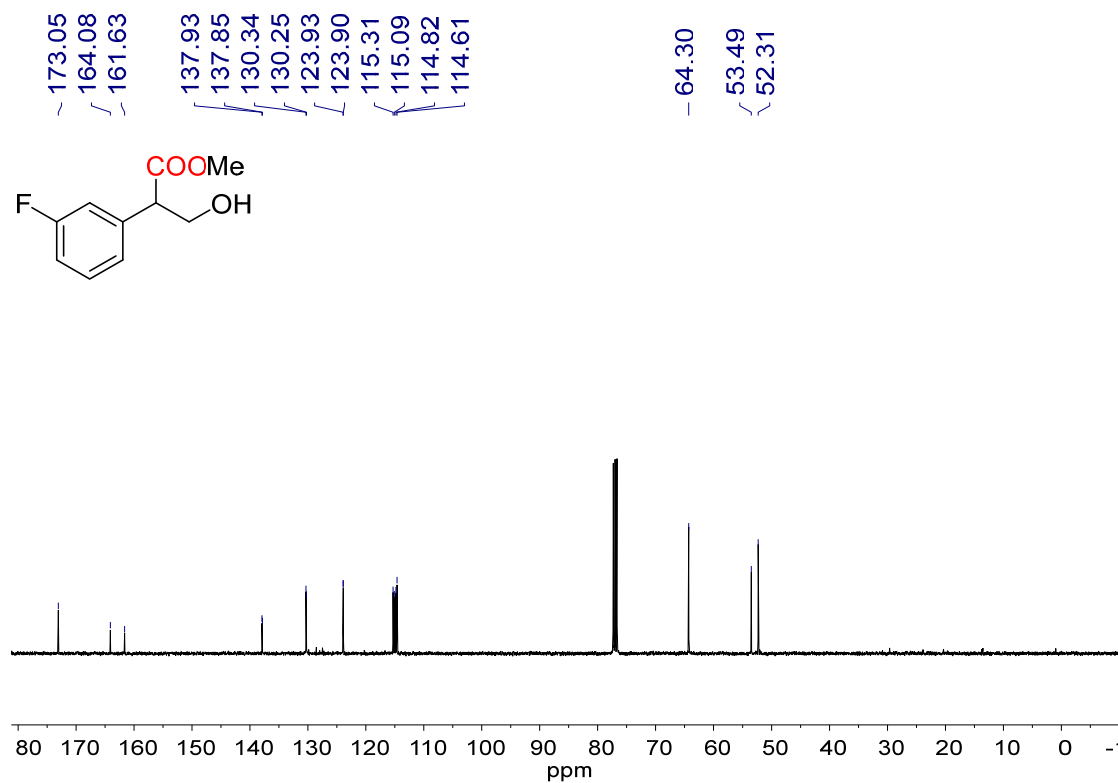

**<sup>13</sup>C{<sup>1</sup>H} NMR spectrum (101 MHz, Chloroform-*d*) of 3r**



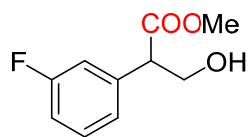

--112.28

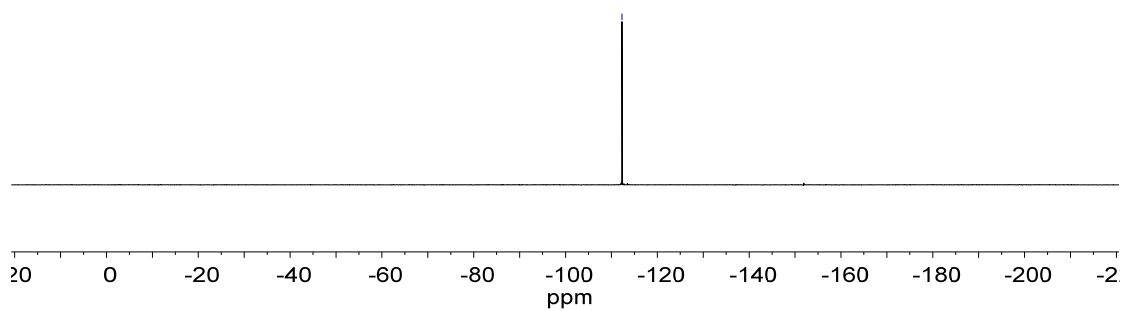

**<sup>19</sup>F NMR spectrum (376 MHz, Chloroform-*d*) of 3r**

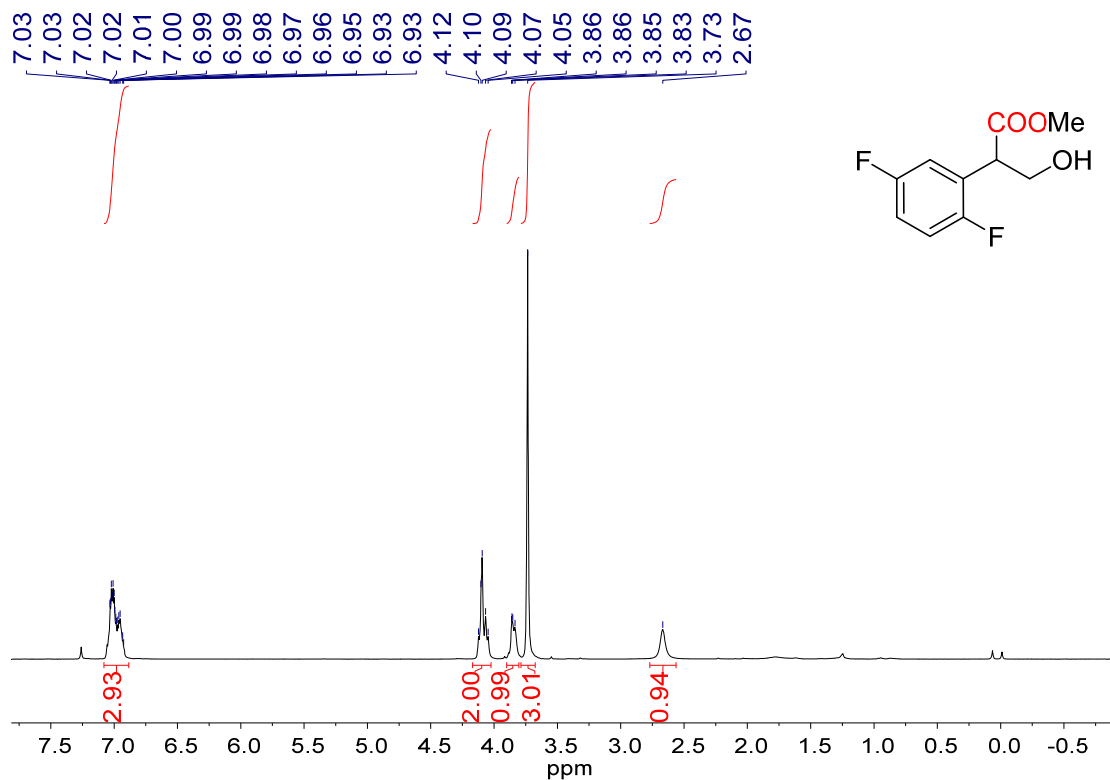

**<sup>1</sup>H NMR spectrum (400 MHz, Chloroform-*d*) of 3s**

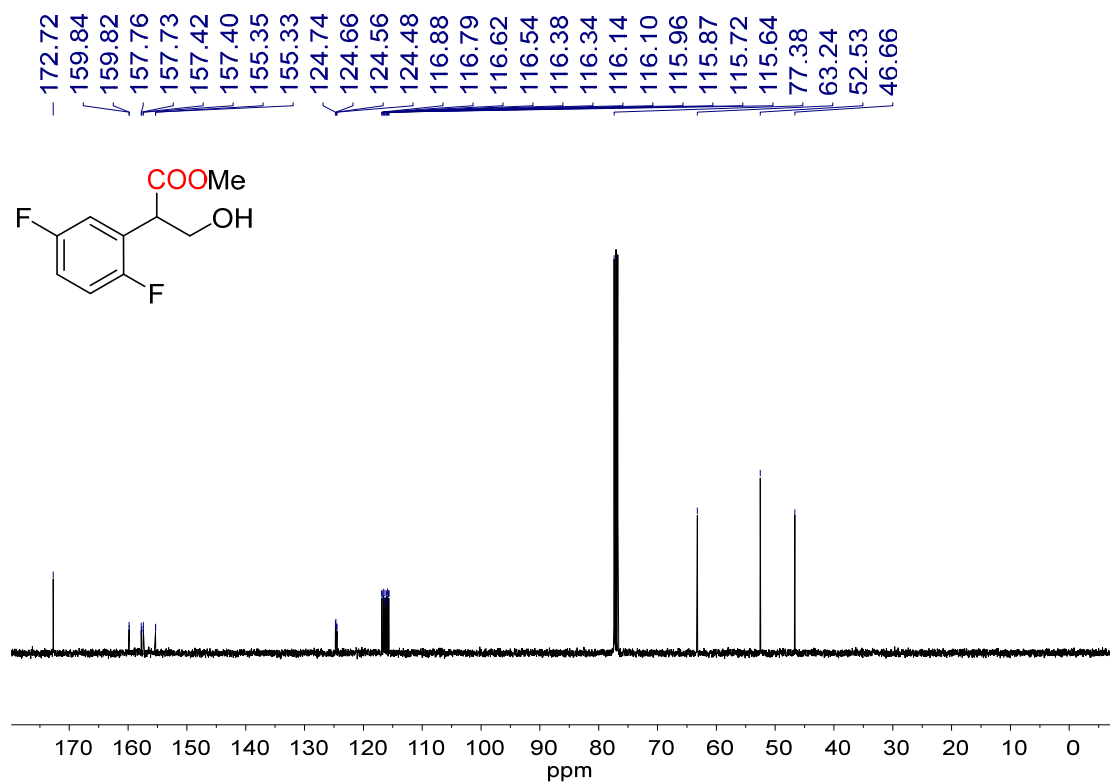

**<sup>13</sup>C{<sup>1</sup>H} NMR spectrum (101 MHz, Chloroform-*d*) of 3s**

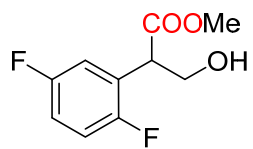

-118.06  
-118.11  
-123.69  
-123.73

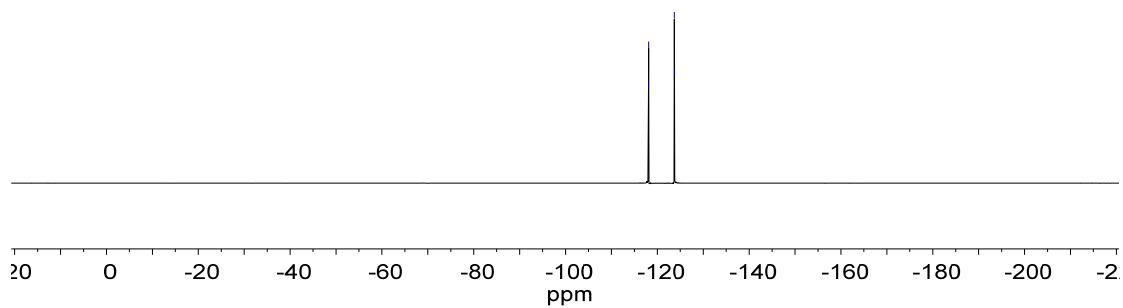

**$^{19}\text{F}$  NMR spectrum (376 MHz, Chloroform-*d*) of 3s**

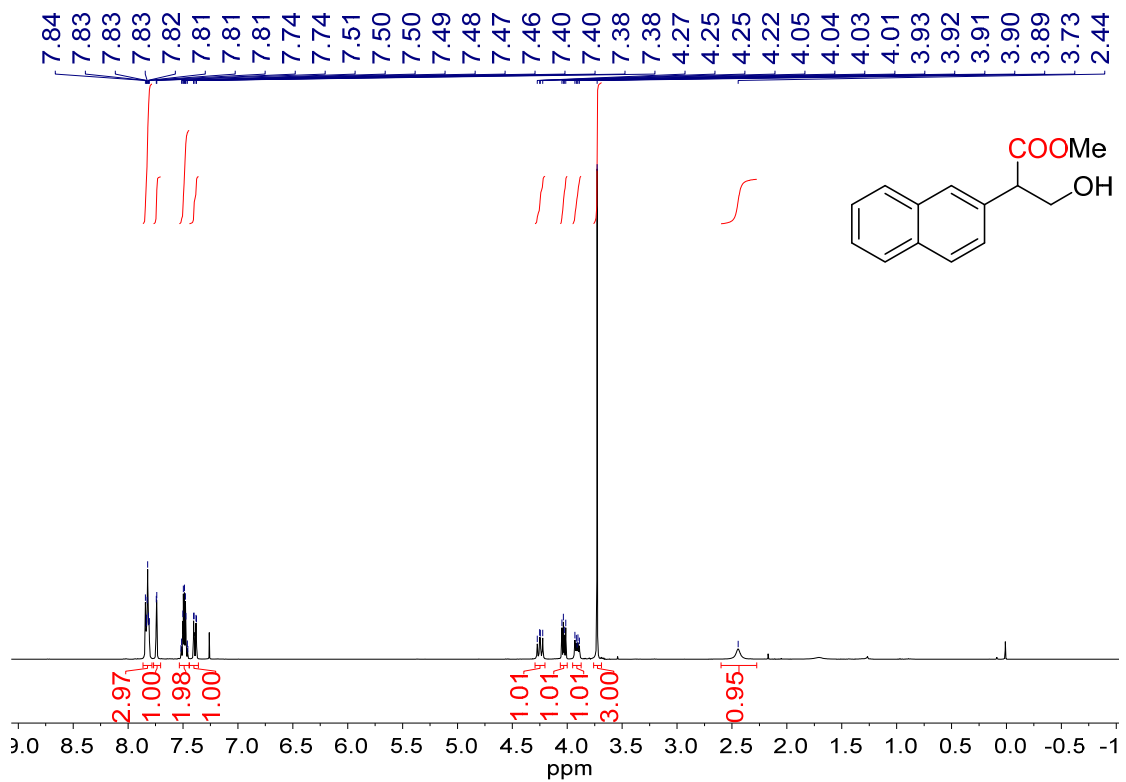

**<sup>1</sup>H NMR spectrum (400 MHz, Chloroform-*d*) of 3t**

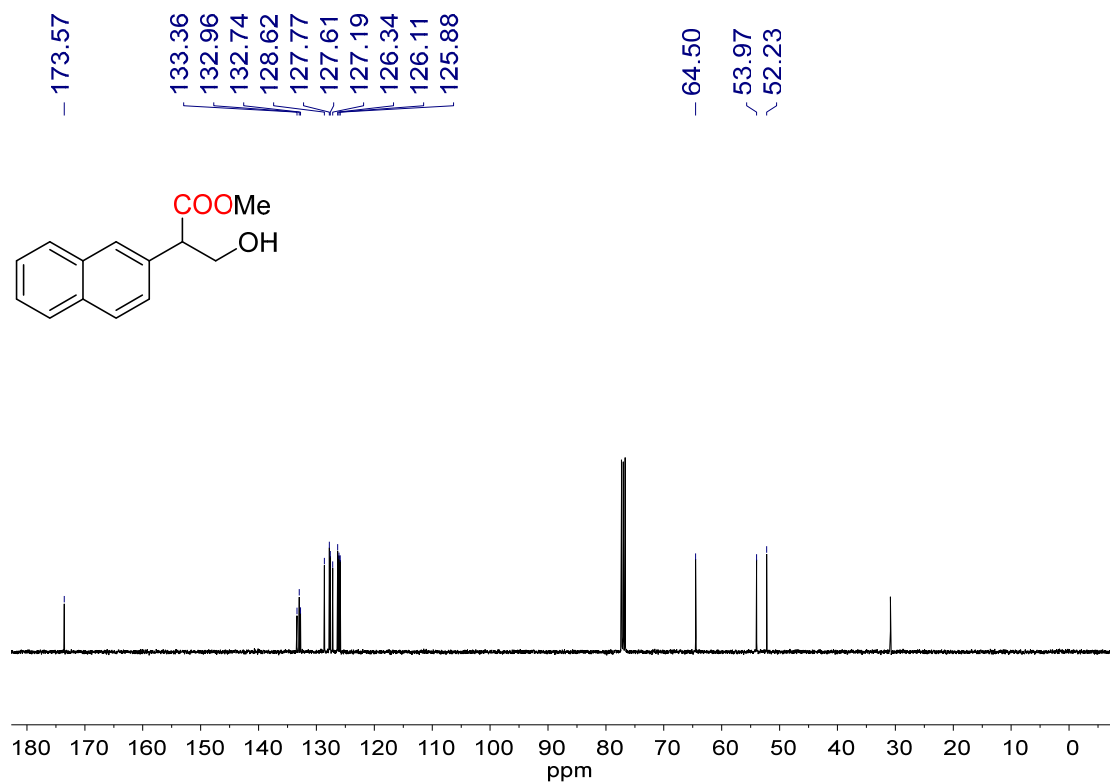

**<sup>13</sup>C{<sup>1</sup>H} NMR spectrum (101 MHz, Chloroform-*d*) of 3t**

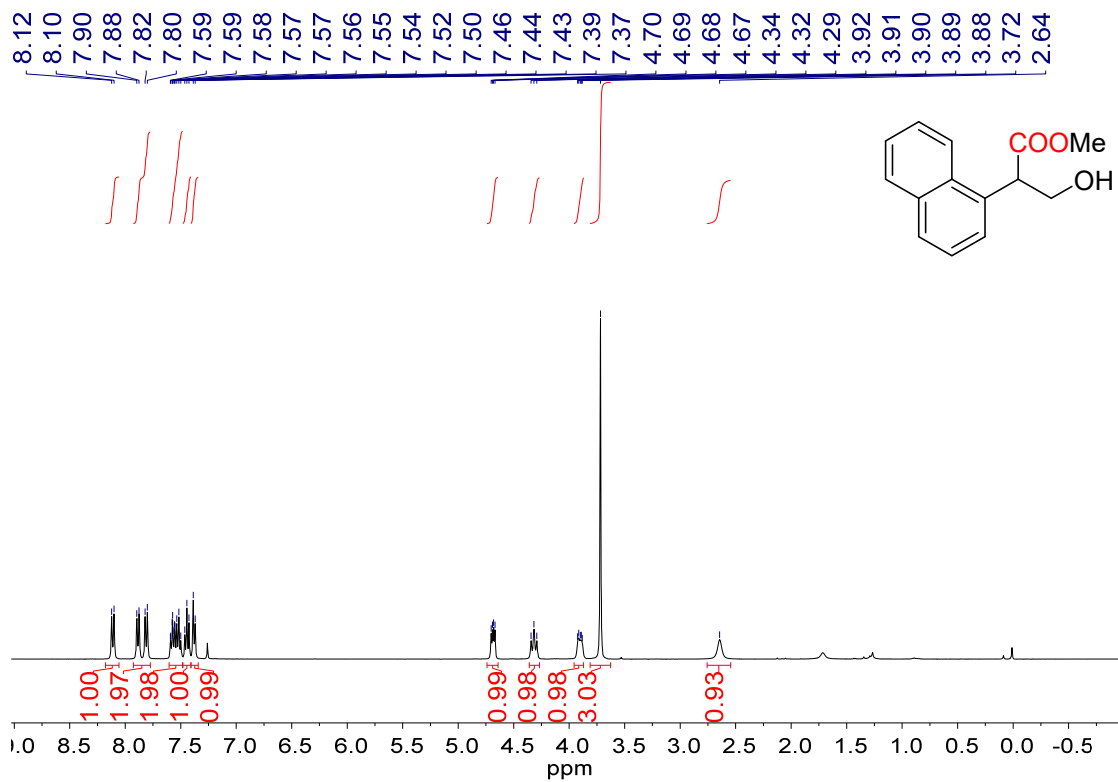

**<sup>1</sup>H NMR spectrum (400 MHz, Chloroform-*d*) of 3u**

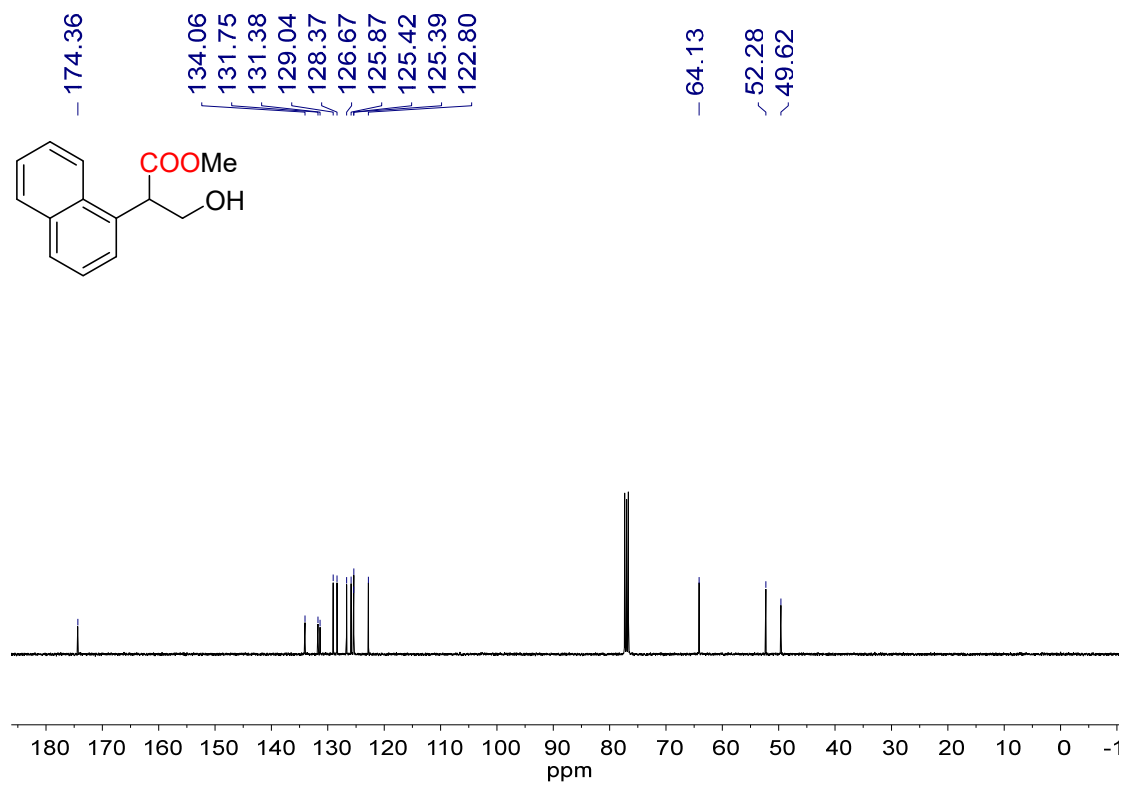

**<sup>13</sup>C{<sup>1</sup>H} NMR spectrum (101 MHz, Chloroform-*d*) of 3u**

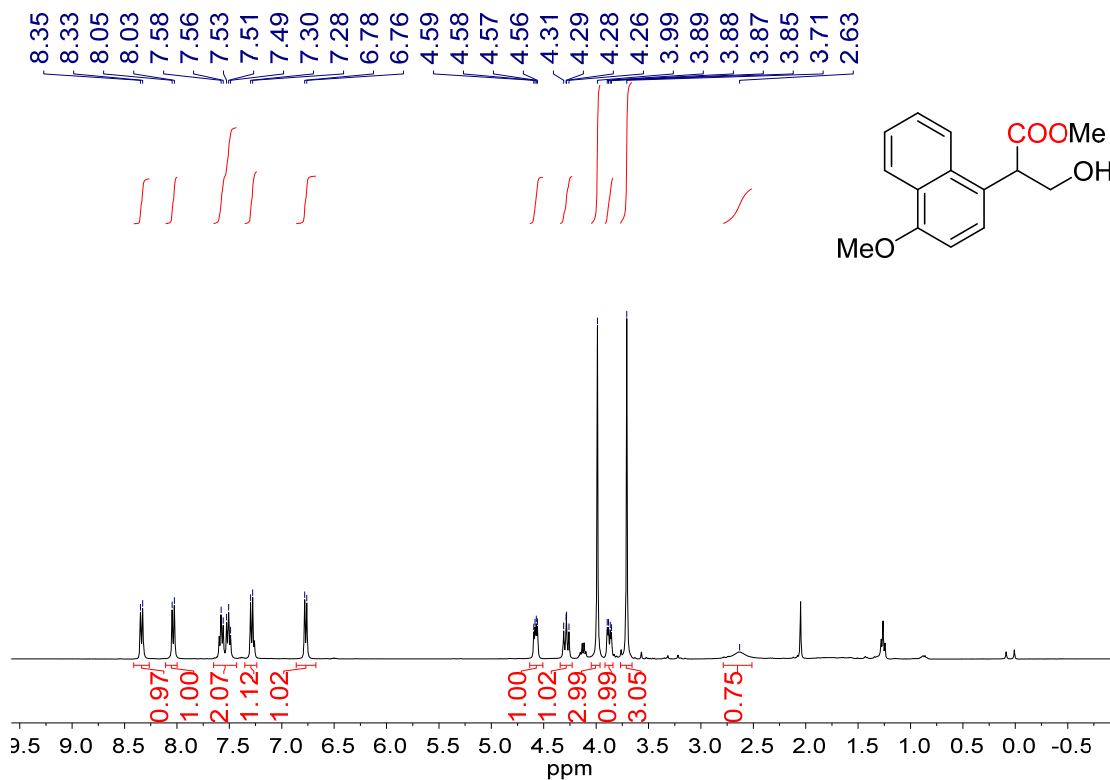

**<sup>1</sup>H NMR spectrum (400 MHz, Chloroform-*d*) of 3v**

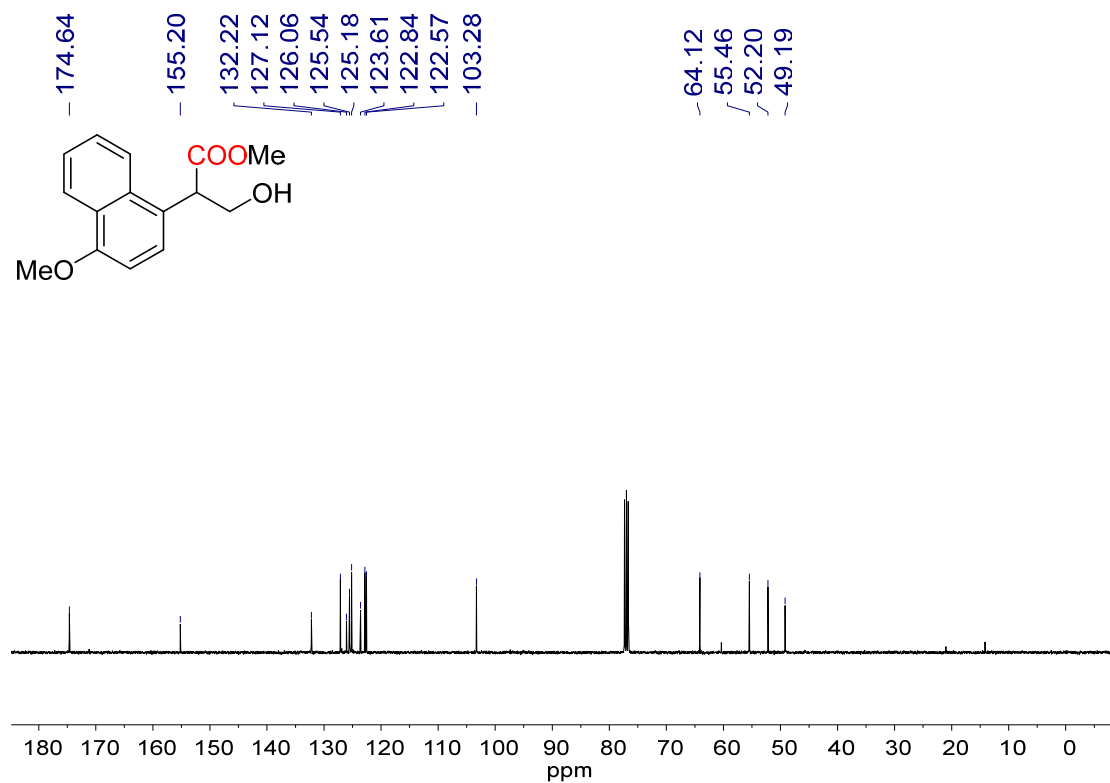

**<sup>13</sup>C{<sup>1</sup>H} NMR spectrum (101 MHz, Chloroform-*d*) of 3v**

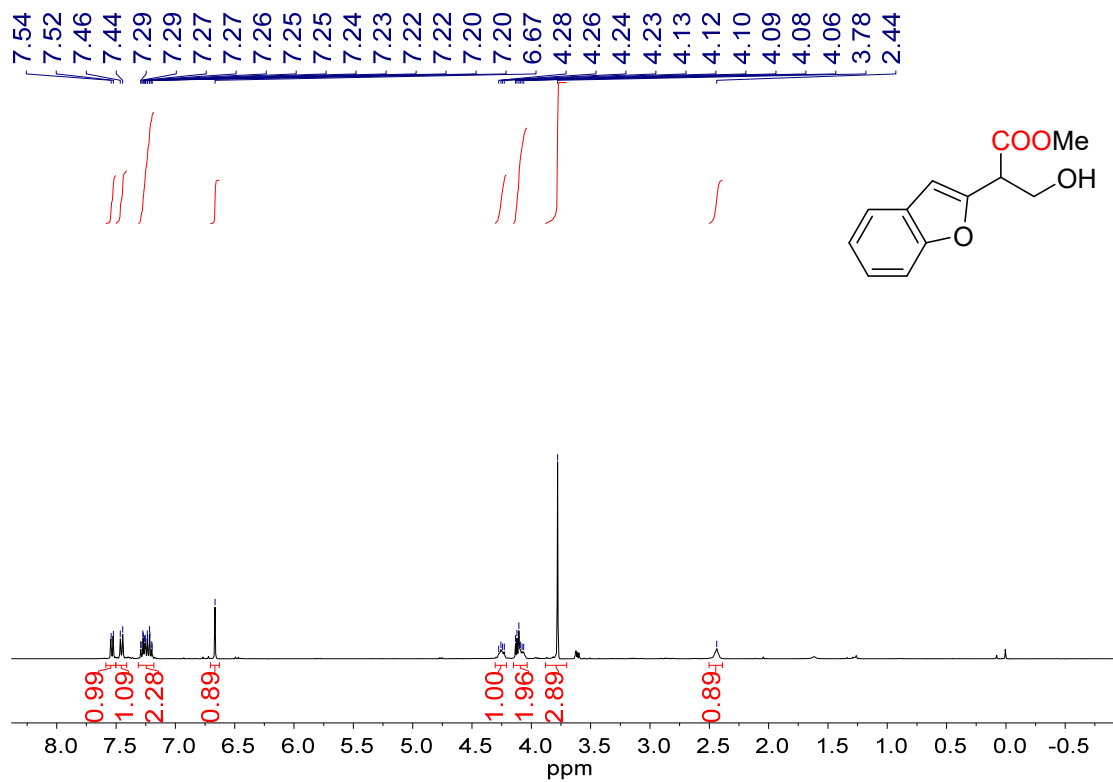

**<sup>1</sup>H NMR spectrum (400 MHz, Chloroform-*d*) of 3w**

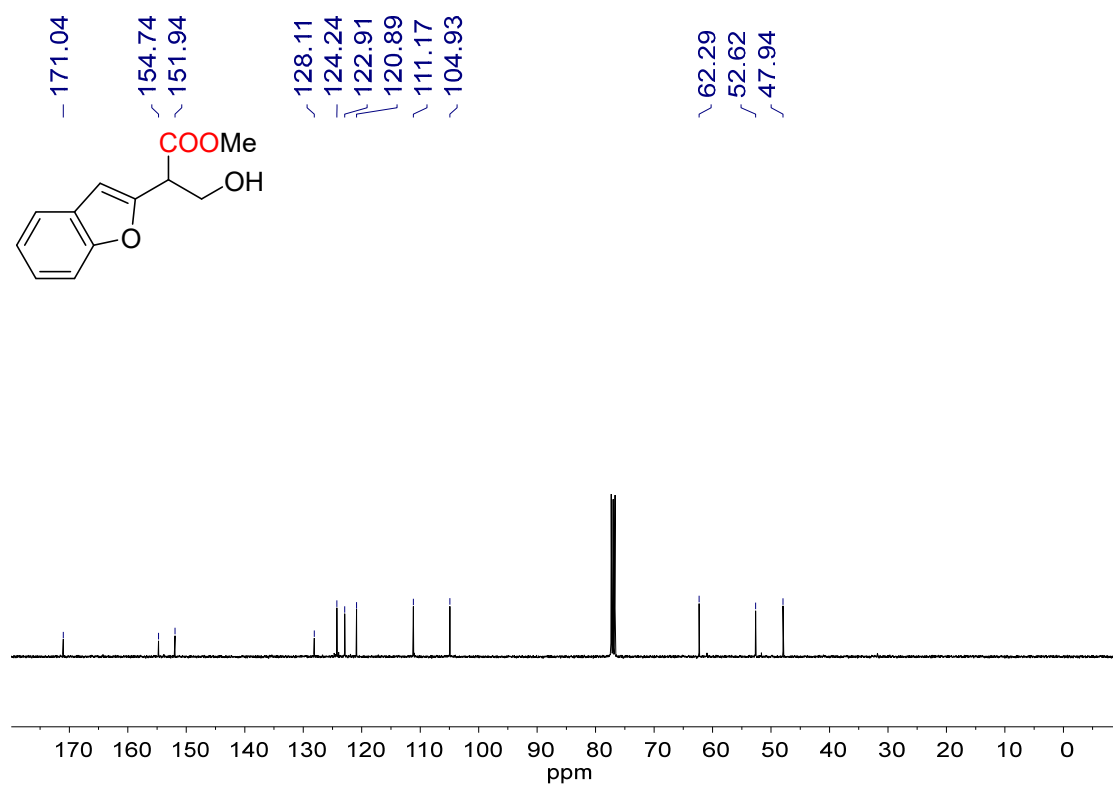

**<sup>13</sup>C{<sup>1</sup>H} NMR spectrum (101 MHz, Chloroform-*d*) of 3w**

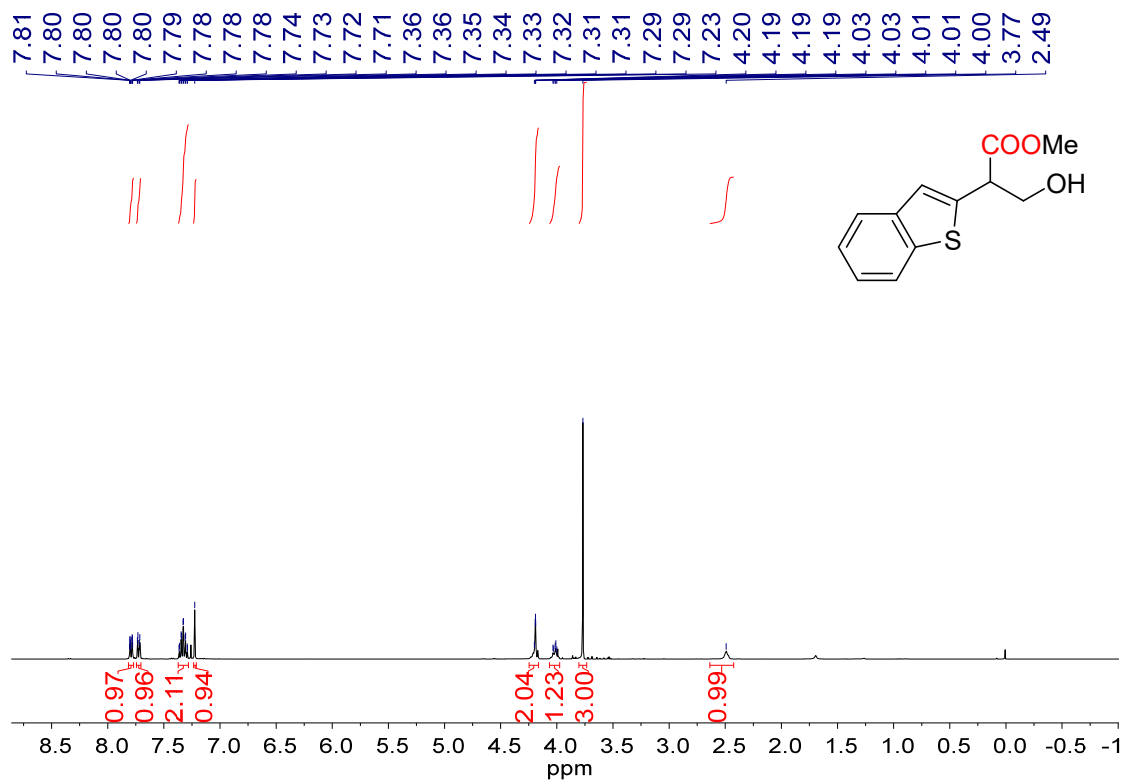

**<sup>1</sup>H NMR spectrum (400 MHz, Chloroform-*d*) of 3x**

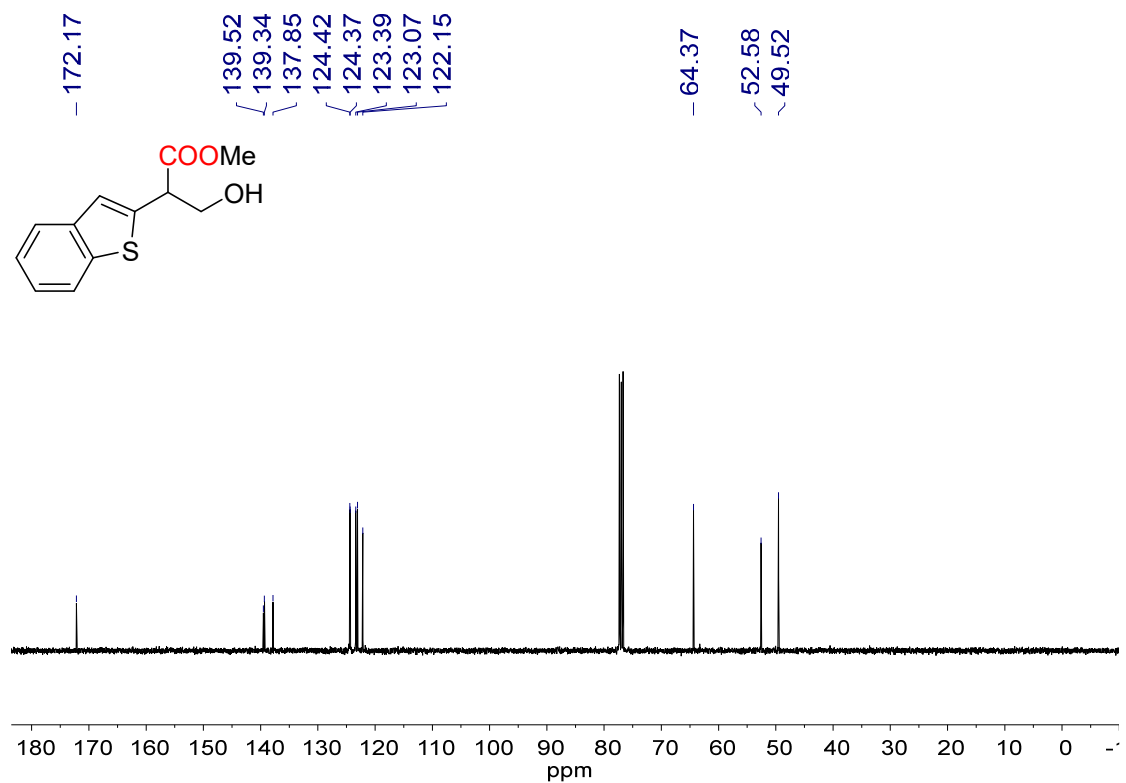

**<sup>13</sup>C{<sup>1</sup>H} NMR spectrum (101 MHz, Chloroform-*d*) of 3x**



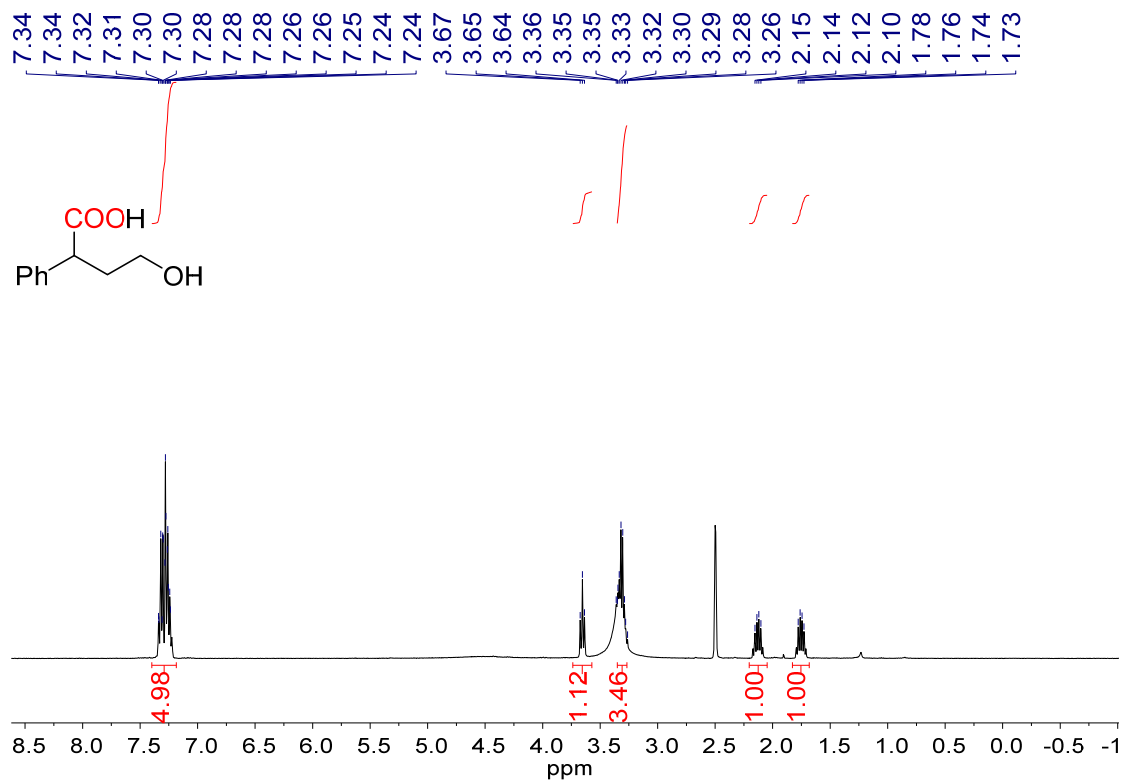

<sup>1</sup>H NMR spectrum (400 MHz, DMSO-*d*<sub>6</sub>) of 3y

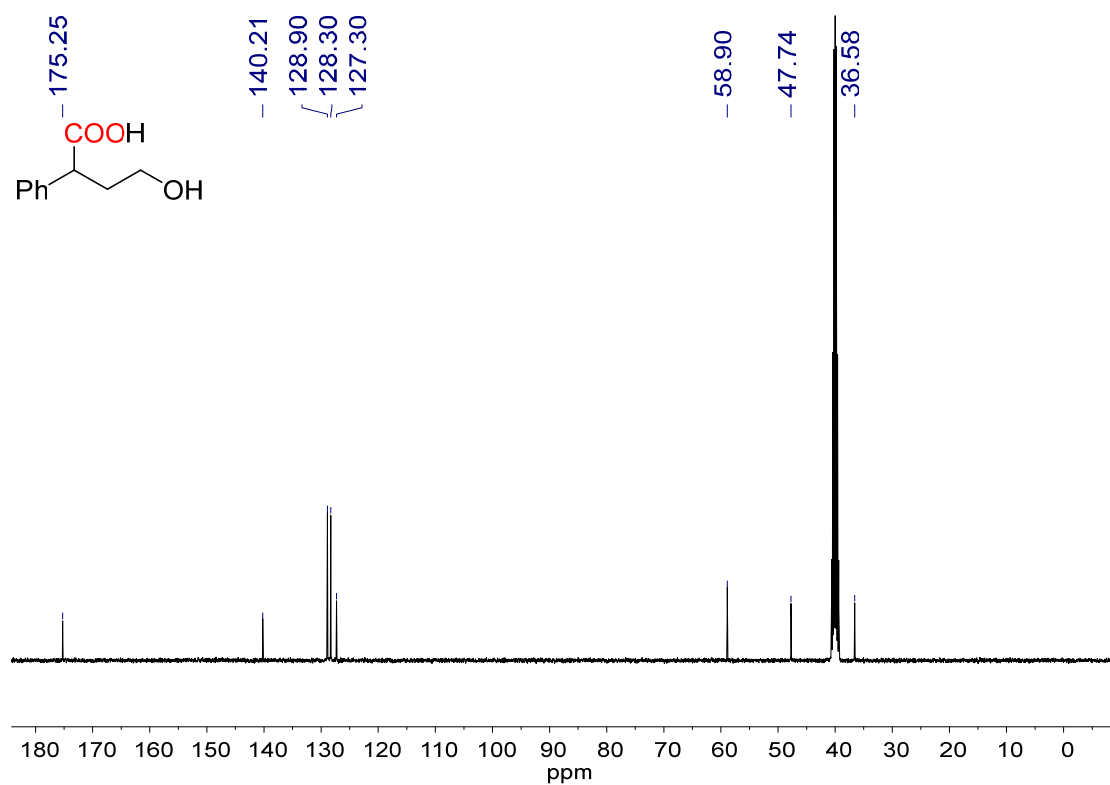

<sup>13</sup>C{<sup>1</sup>H} NMR spectrum (101 MHz, DMSO-*d*<sub>6</sub>) of 3y

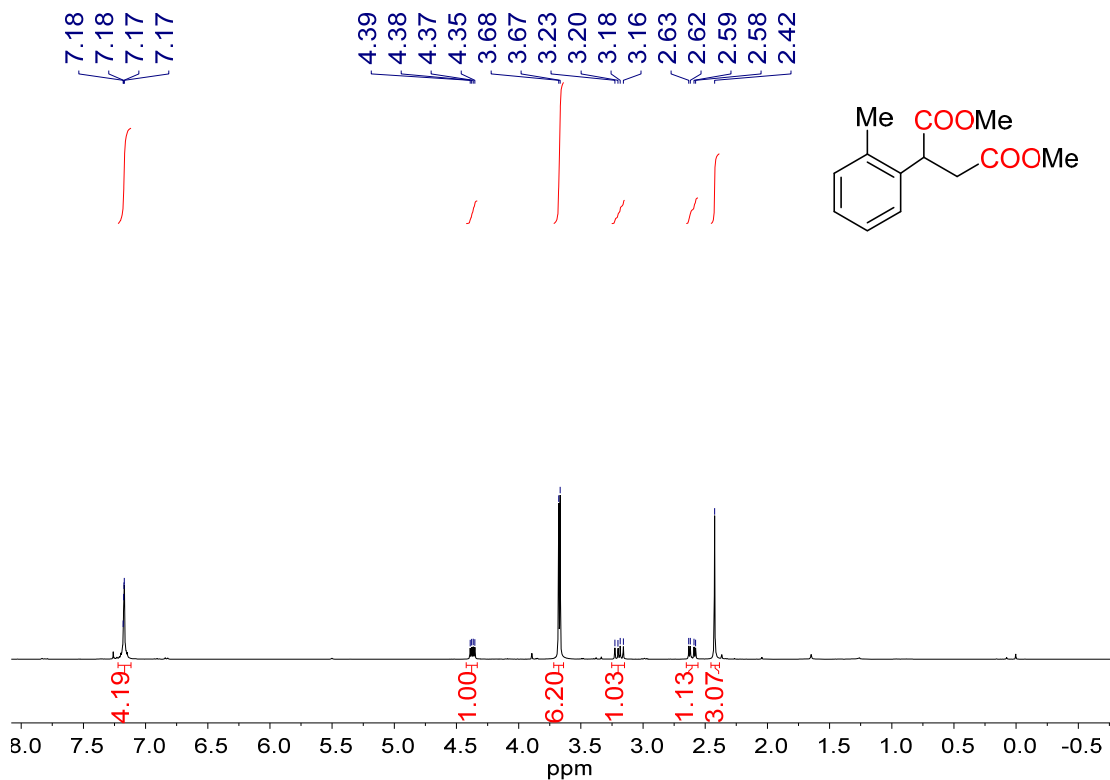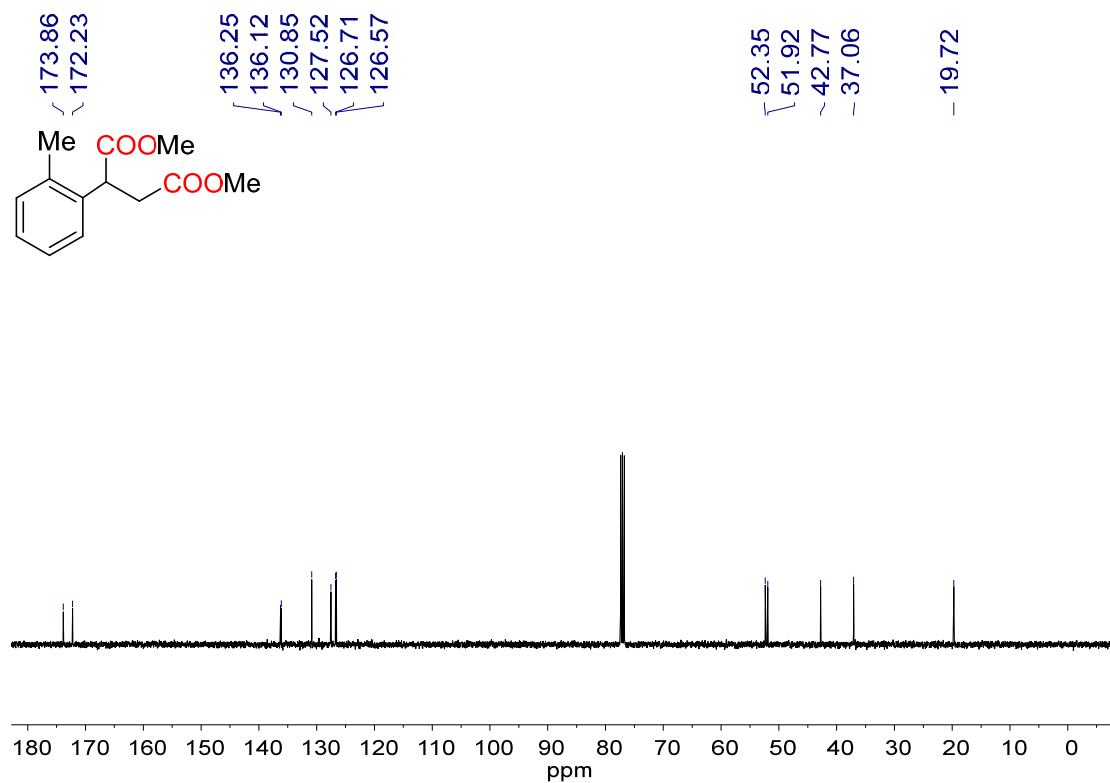

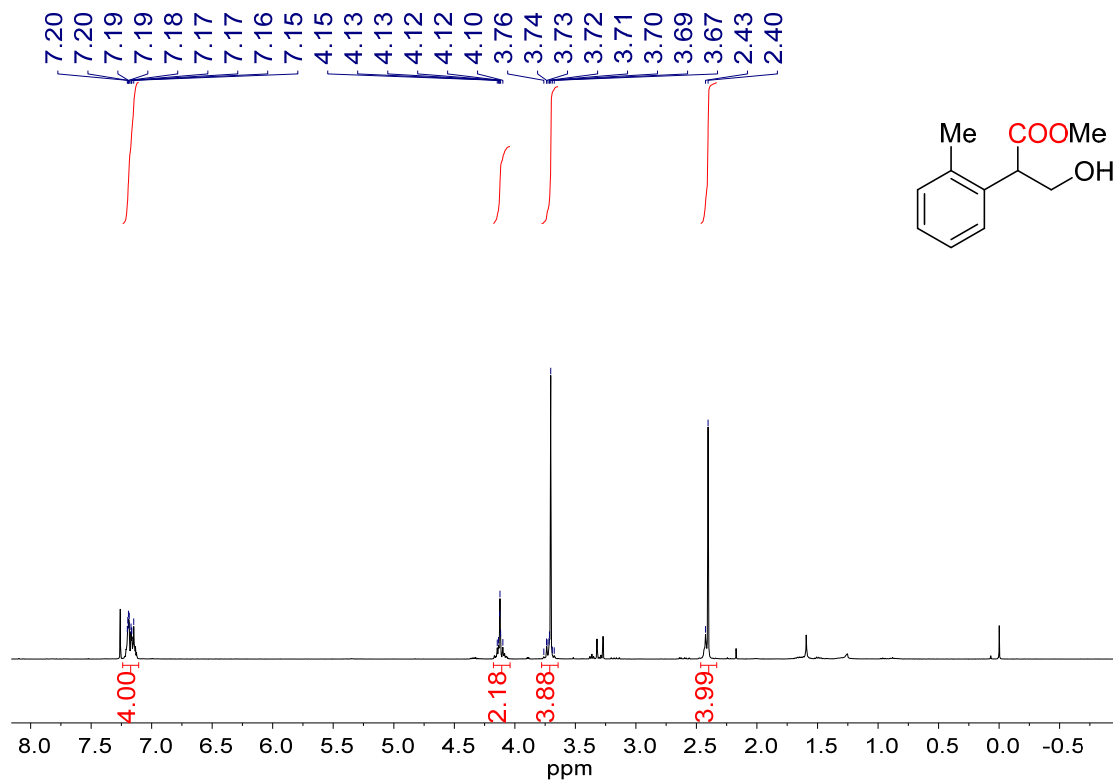

**<sup>1</sup>H NMR spectrum (400 MHz, Chloroform-*d*) of 3z**

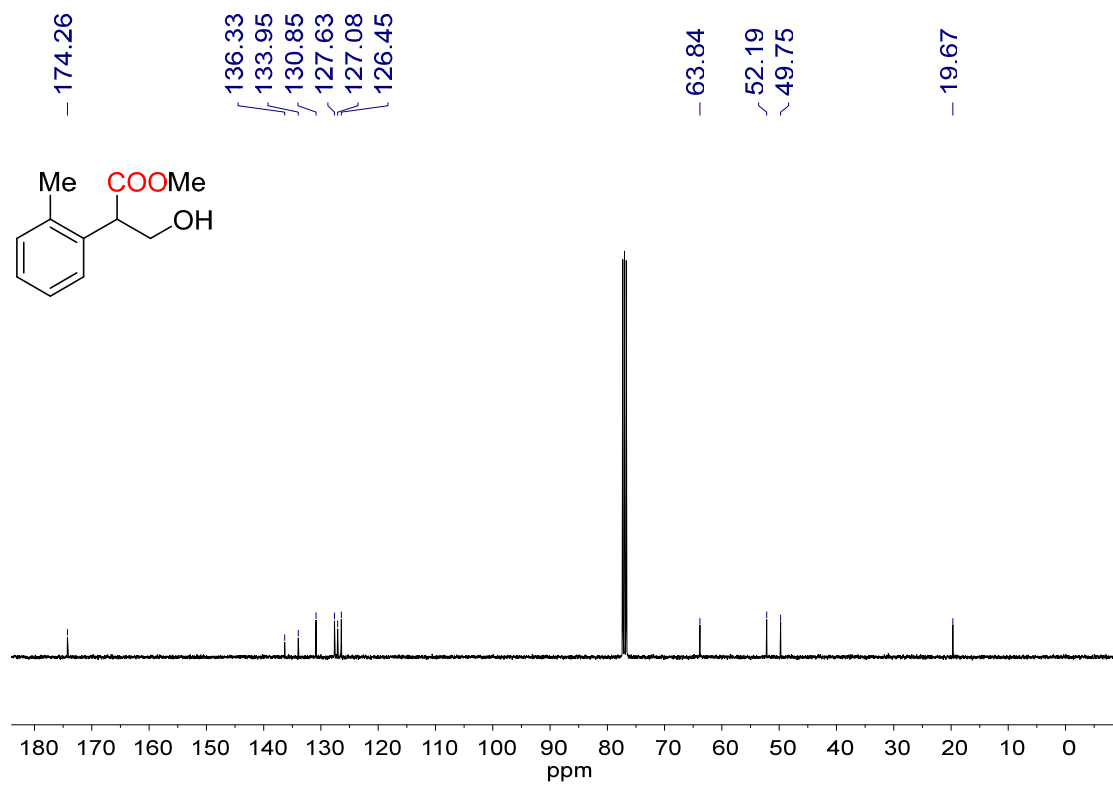

**<sup>13</sup>C{<sup>1</sup>H} NMR spectrum (101 MHz, Chloroform-*d*) of 3z**

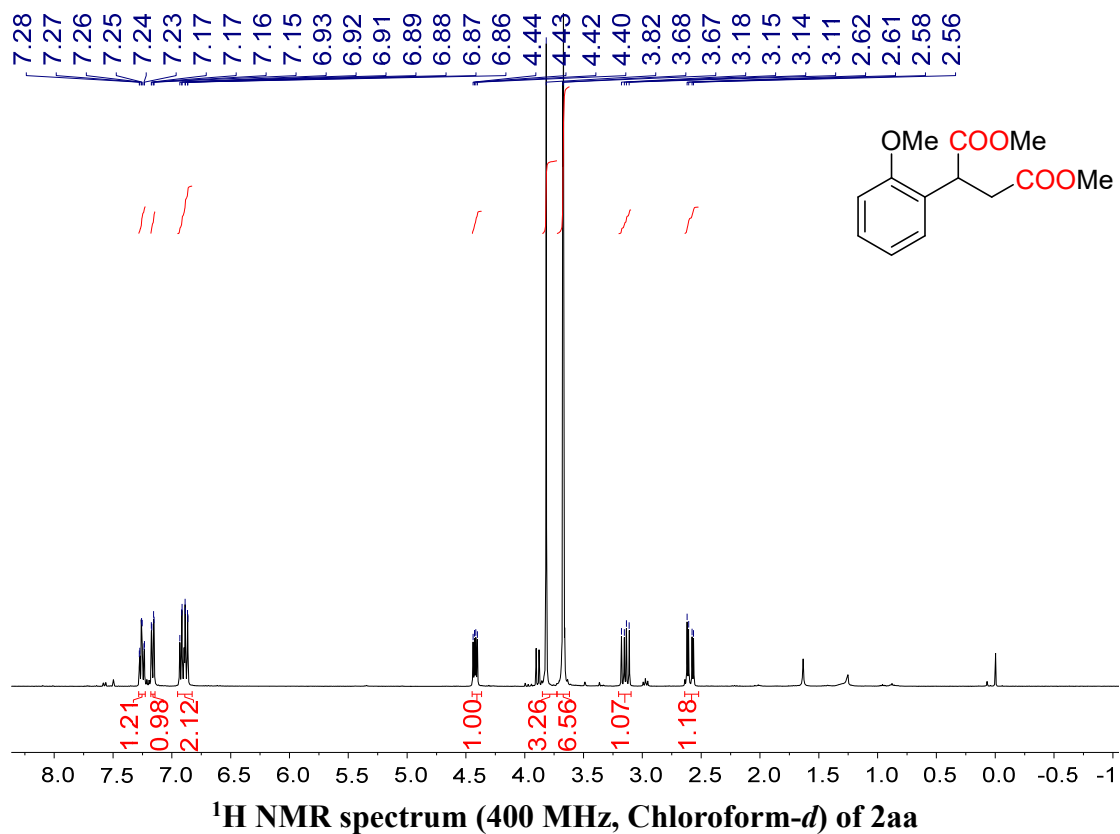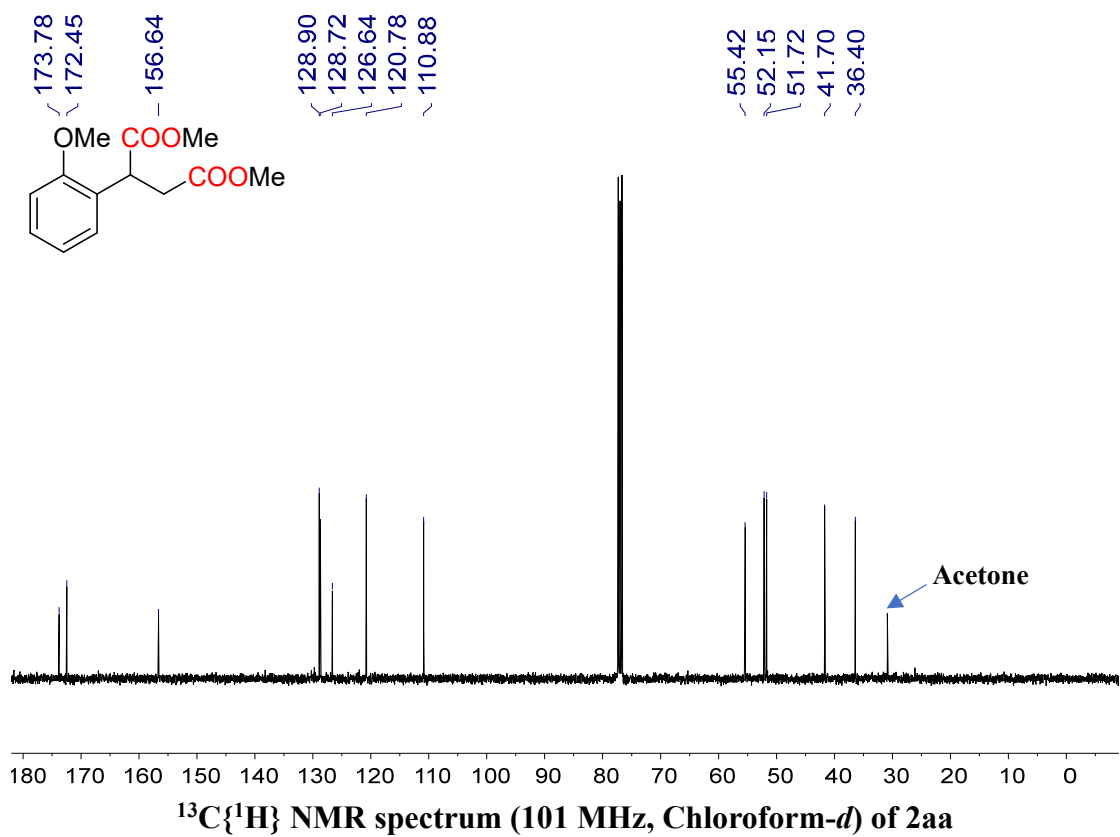

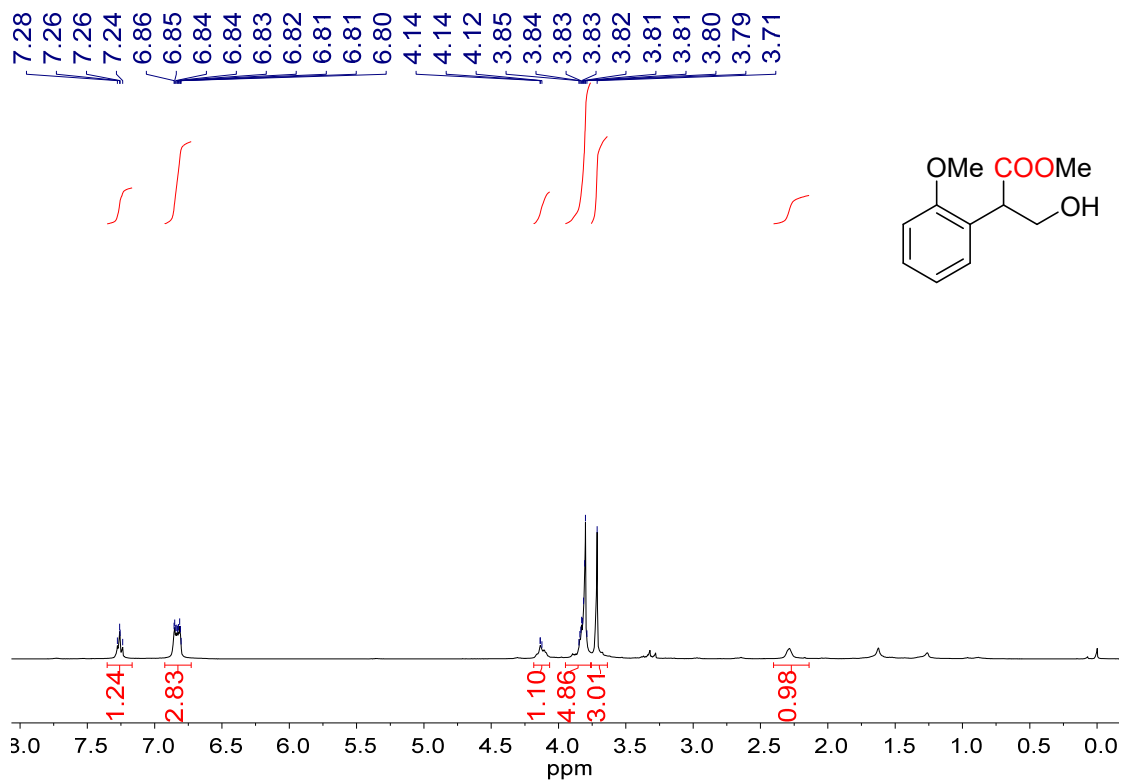

<sup>1</sup>H NMR spectrum (400 MHz, Chloroform-*d*) of 3aa

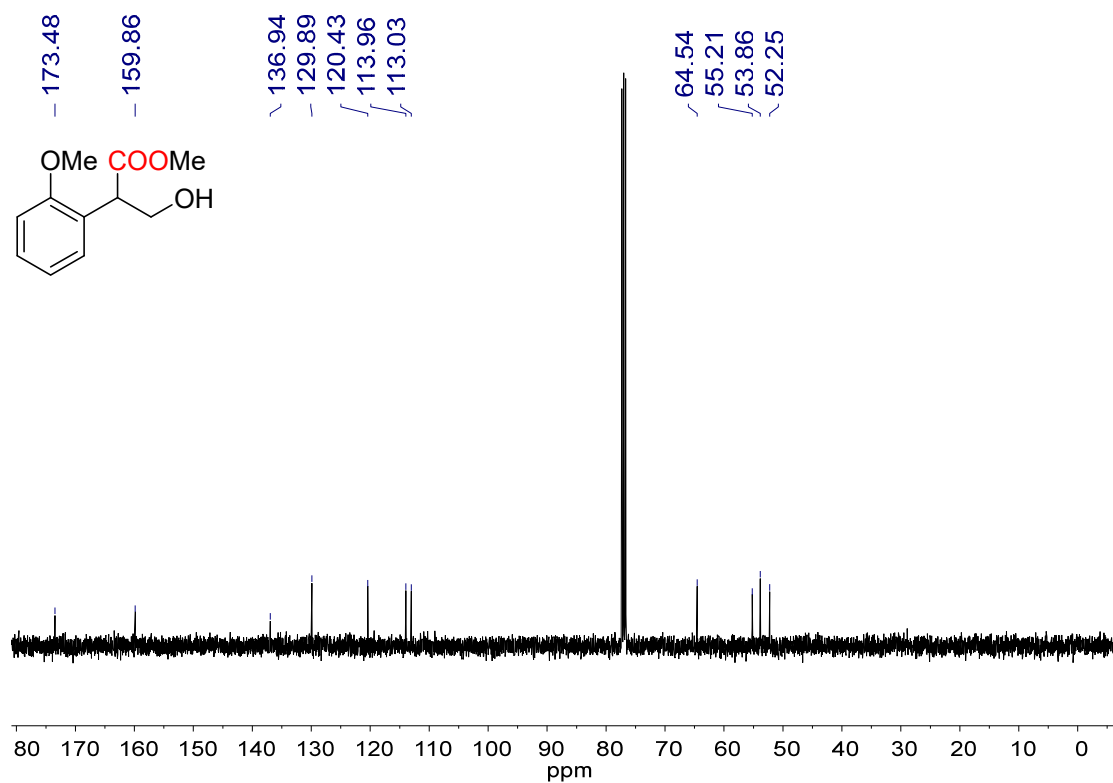

<sup>13</sup>C{<sup>1</sup>H} NMR spectrum (101 MHz, Chloroform-*d*) of 3aa

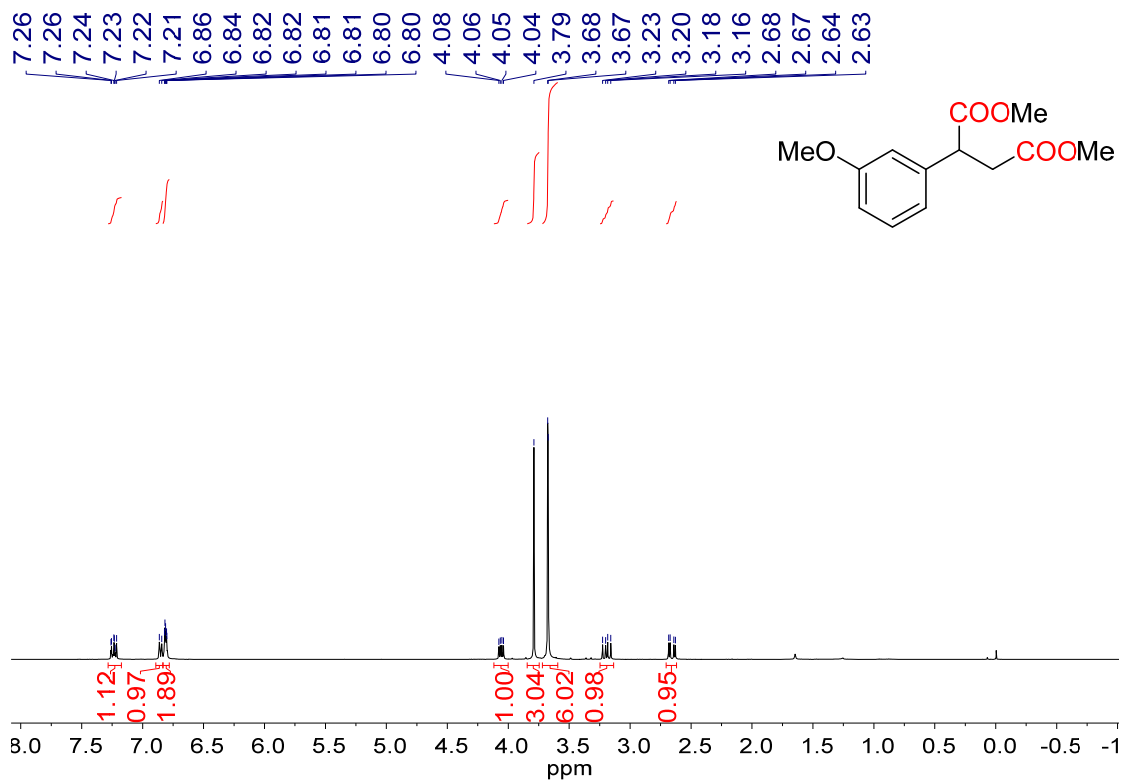

<sup>1</sup>H NMR spectrum (400 MHz, Chloroform-*d*) of 2ab

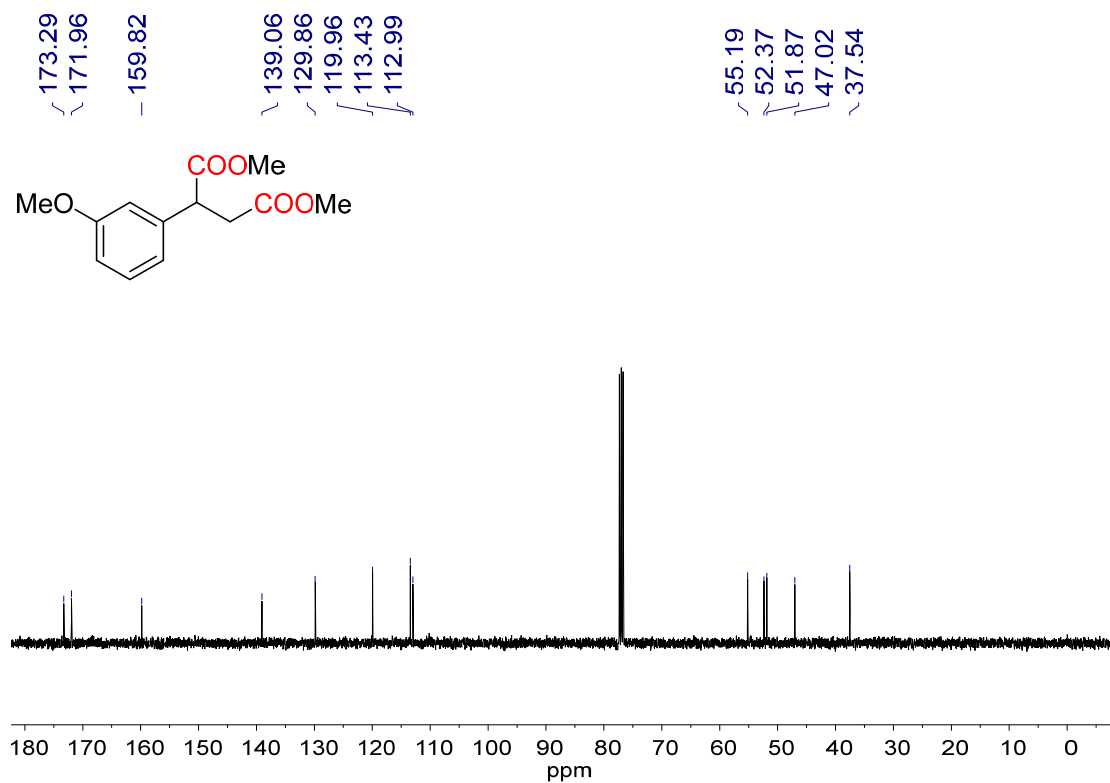

<sup>13</sup>C{<sup>1</sup>H} NMR spectrum (101 MHz, Chloroform-*d*) of 2ab

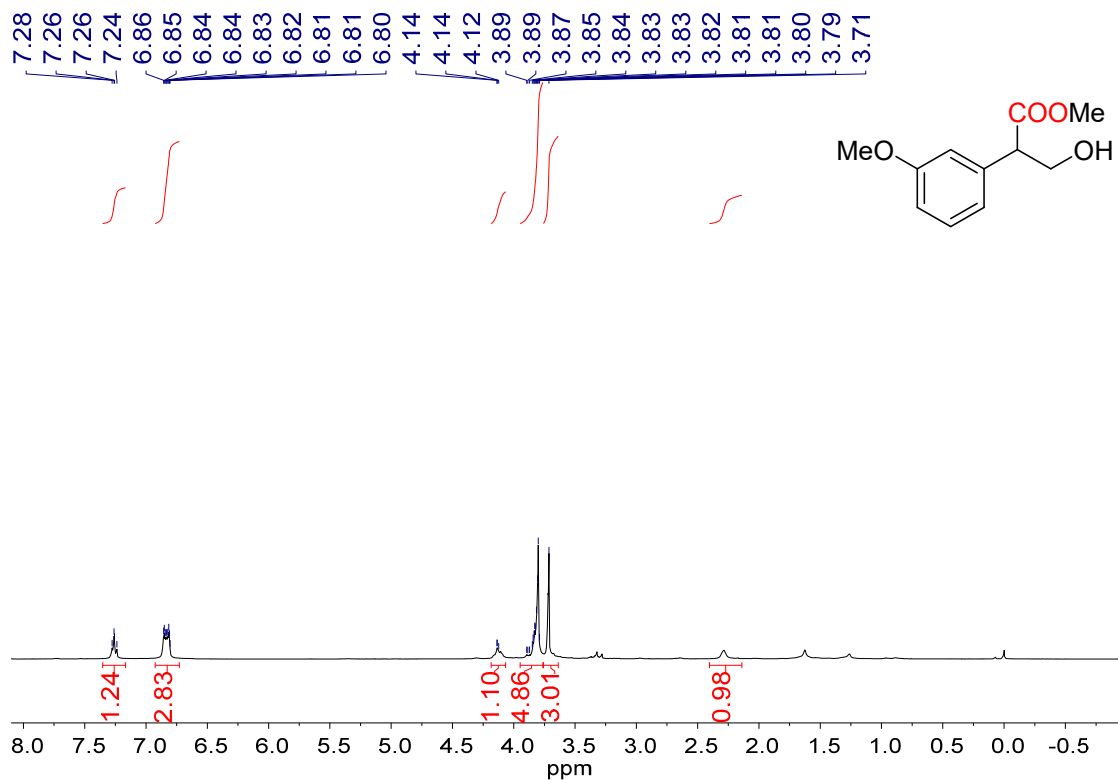

<sup>1</sup>H NMR spectrum (400 MHz, Chloroform-*d*) of 3ab

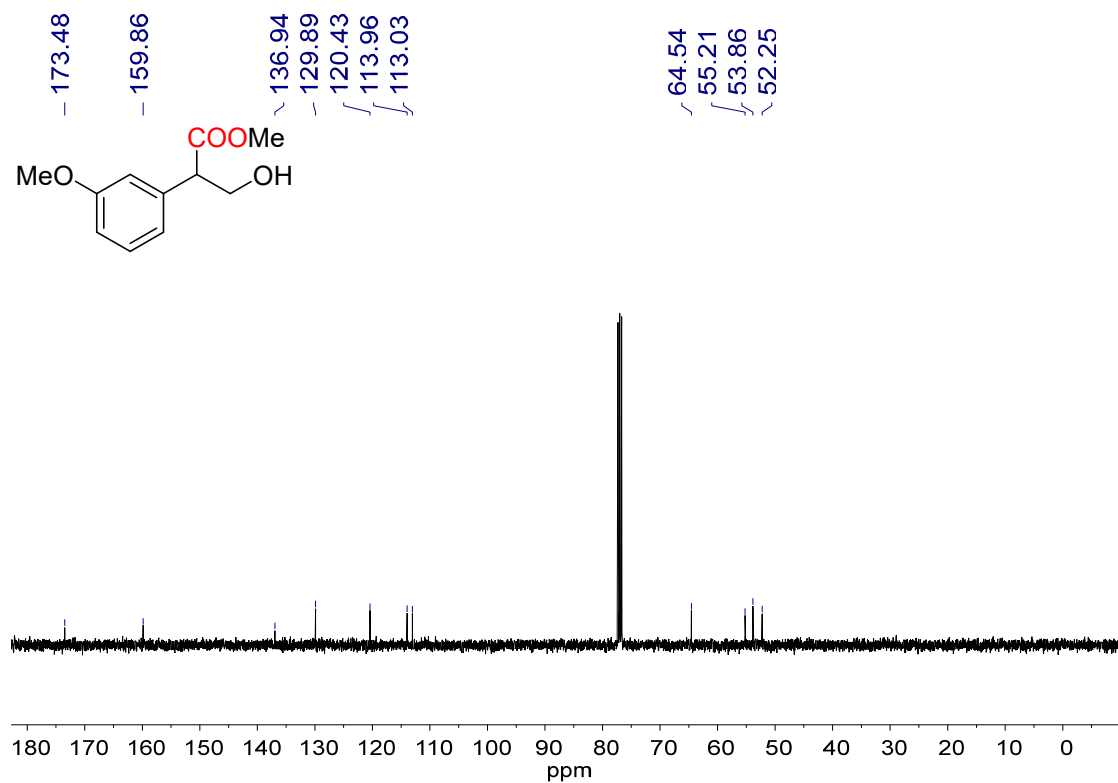

<sup>13</sup>C{<sup>1</sup>H} NMR spectrum (101 MHz, Chloroform-*d*) of 3ab

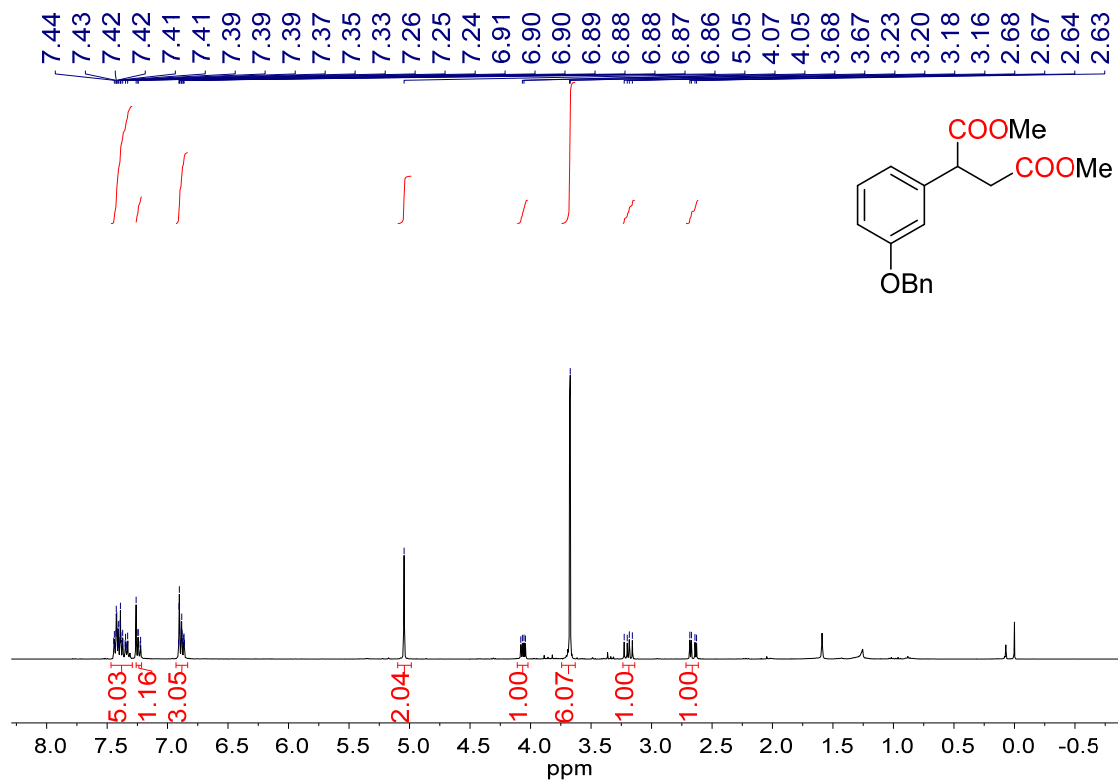

<sup>1</sup>H NMR spectrum (600 MHz, Chloroform-*d*) of 2ac

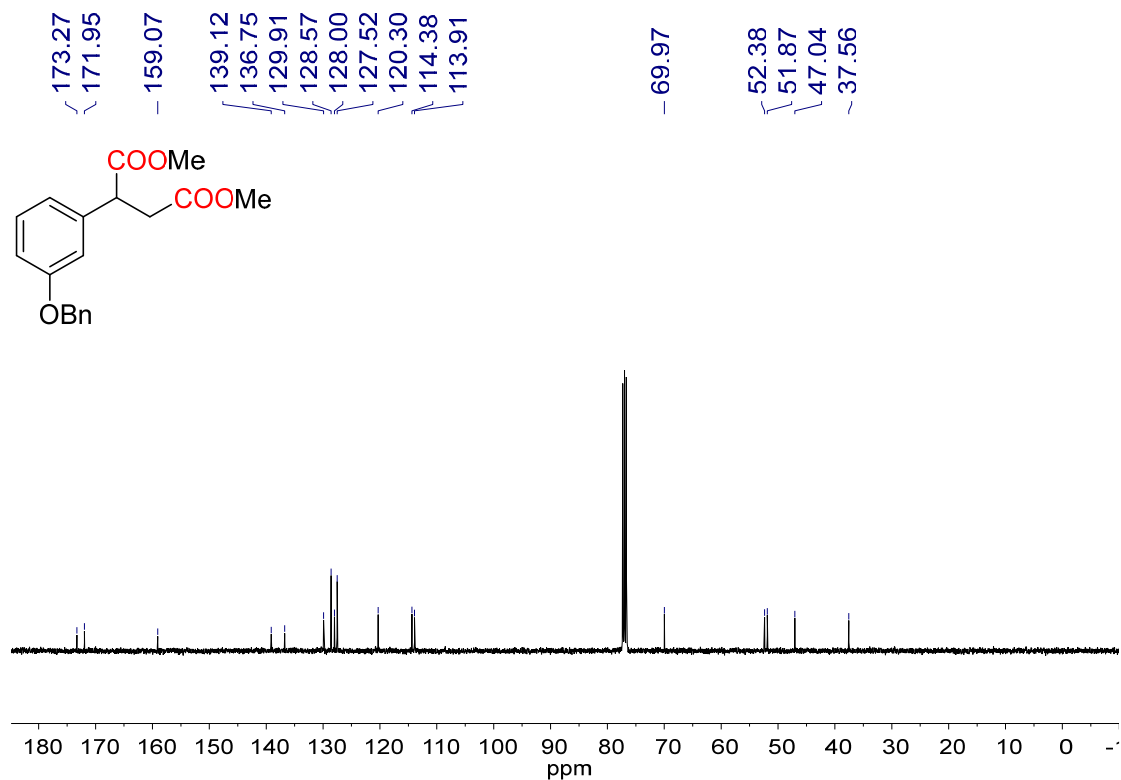

<sup>13</sup>C{<sup>1</sup>H} NMR spectrum (101 MHz, Chloroform-*d*) of 2ac



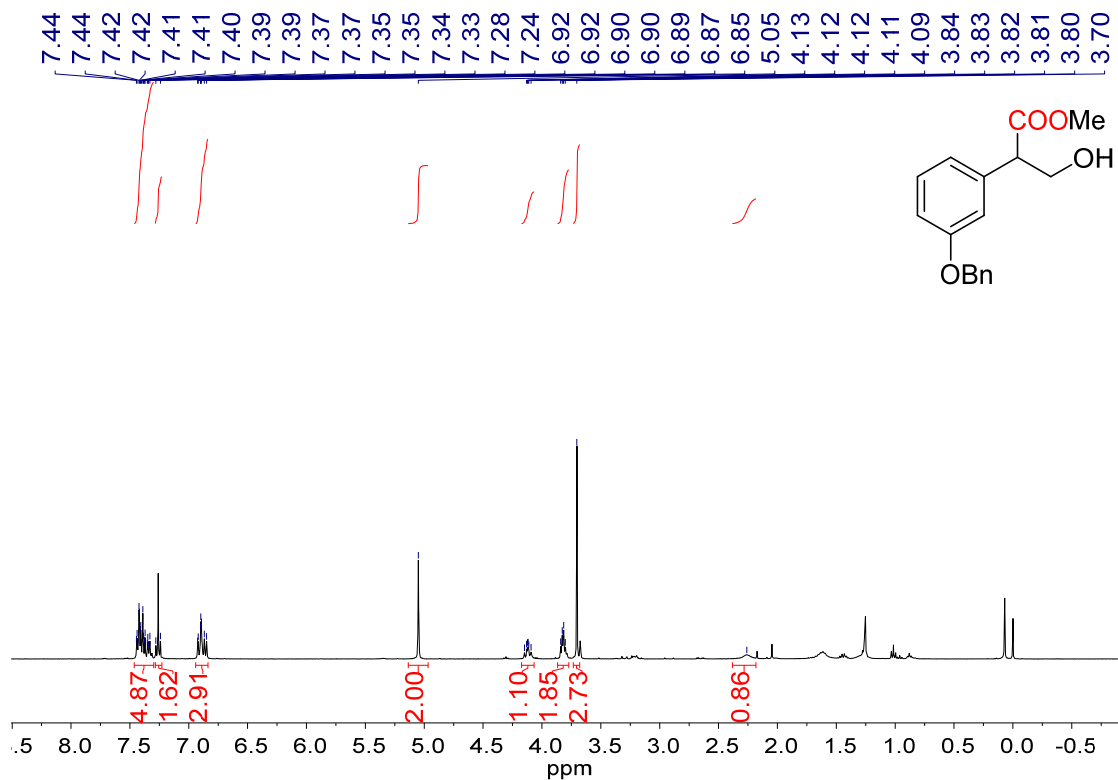

<sup>1</sup>H NMR spectrum (400 MHz, Chloroform-*d*) of 3ac

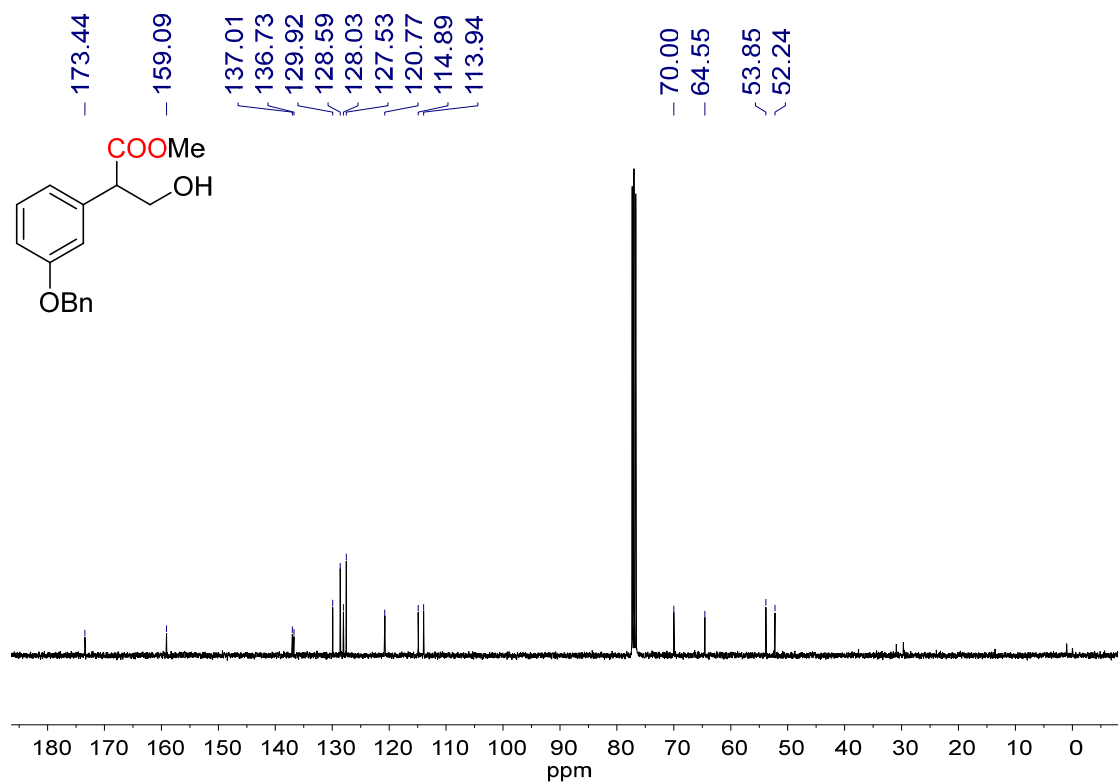

<sup>13</sup>C{<sup>1</sup>H} NMR spectrum (101 MHz, Chloroform-*d*) of 3ac

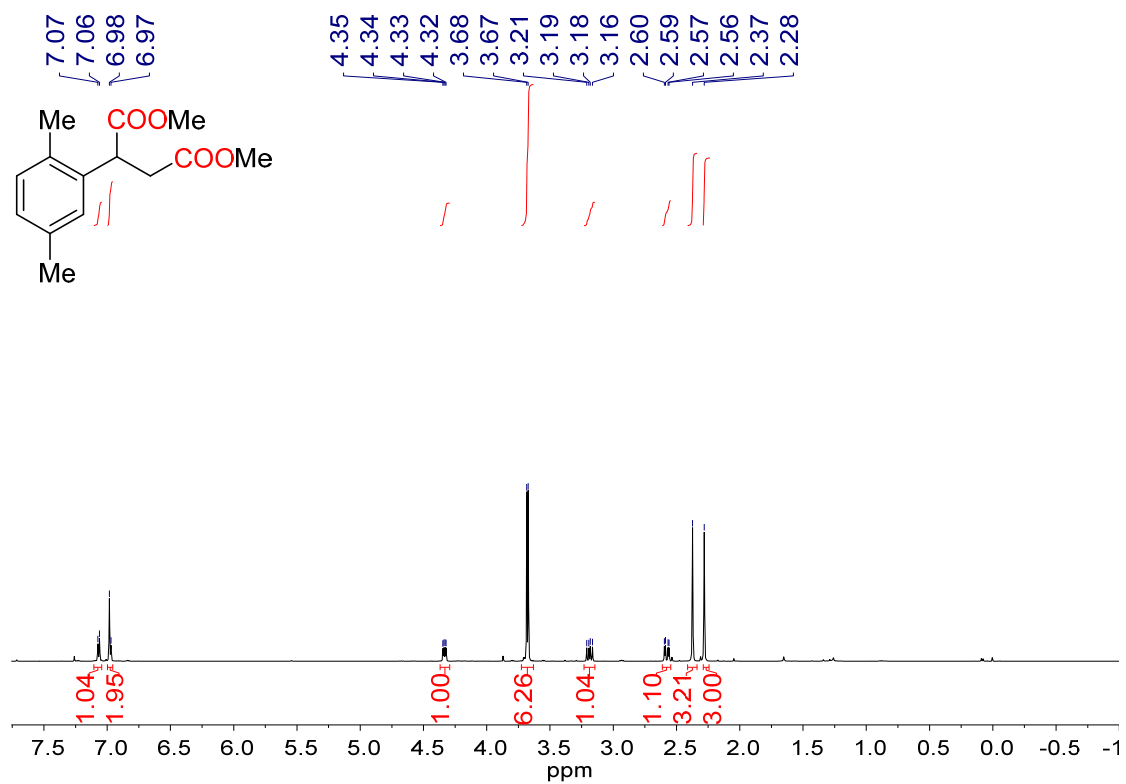

<sup>1</sup>H NMR spectrum (400 MHz, Chloroform-*d*) of 2ad

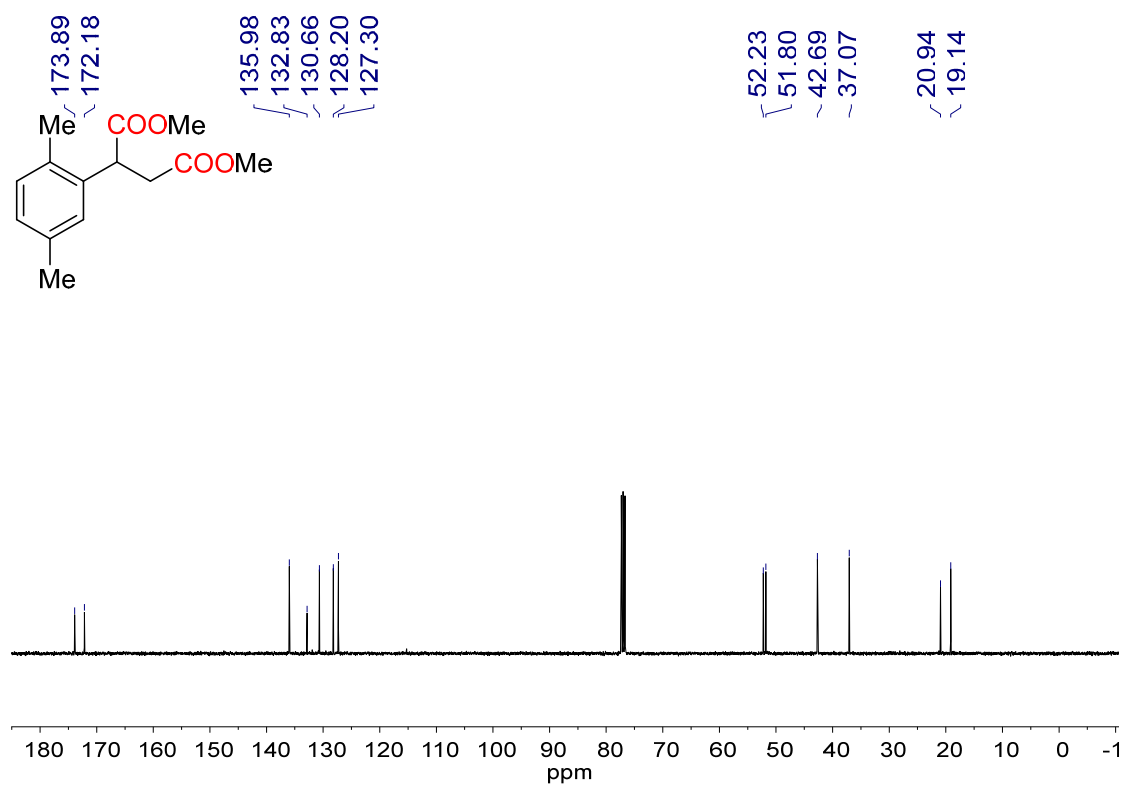

<sup>13</sup>C{<sup>1</sup>H} NMR spectrum (101 MHz, Chloroform-*d*) of 2ad

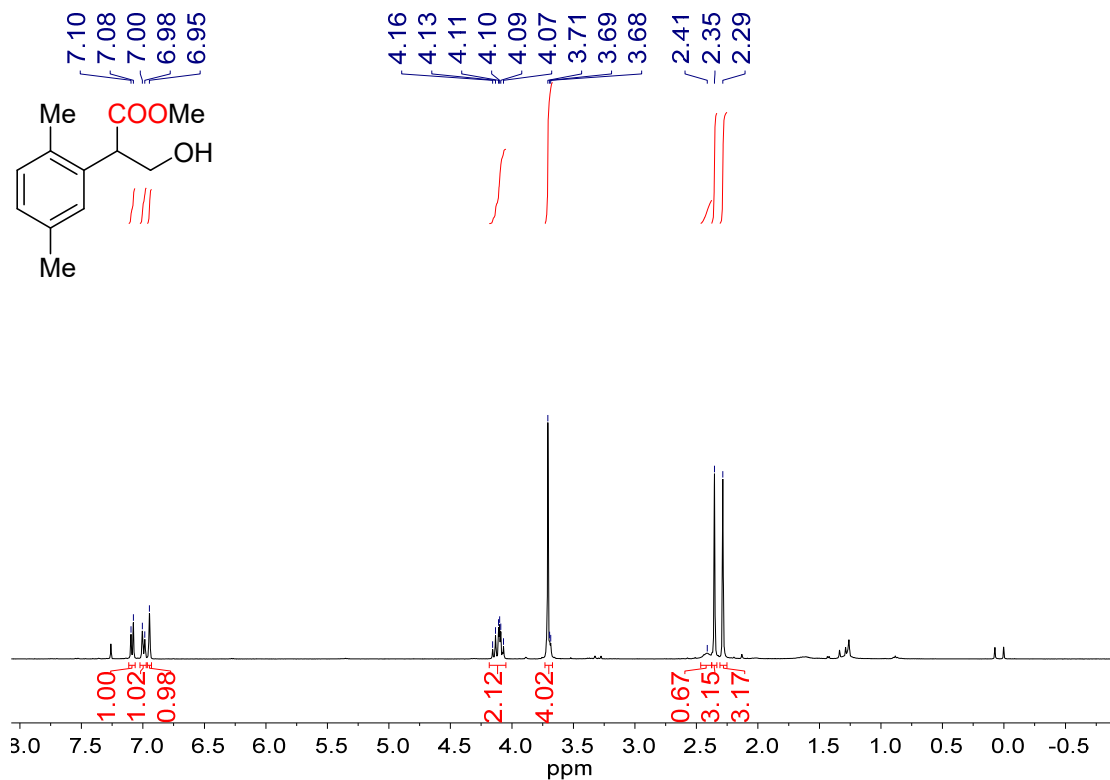

<sup>1</sup>H NMR spectrum (400 MHz, Chloroform-*d*) of 3ad

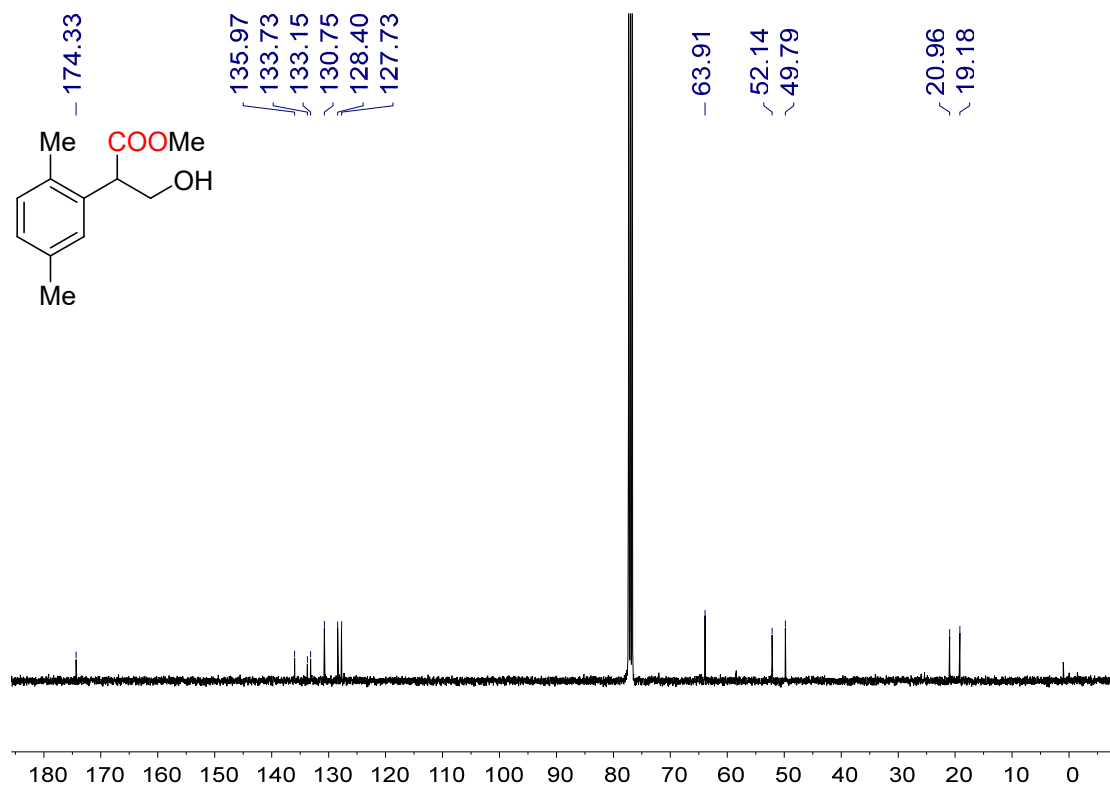

<sup>13</sup>C{<sup>1</sup>H} NMR spectrum (101 MHz, Chloroform-*d*) of 3ad

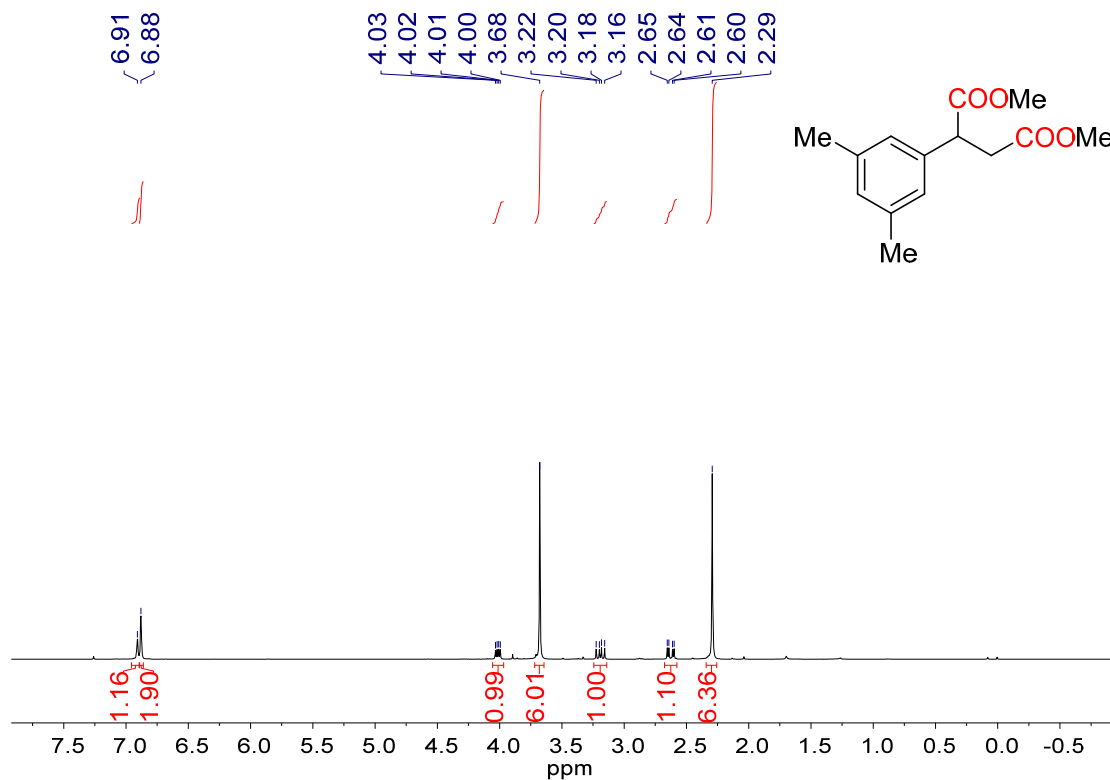

$^1\text{H}$  NMR spectrum (400 MHz, Chloroform-*d*) of 2ae

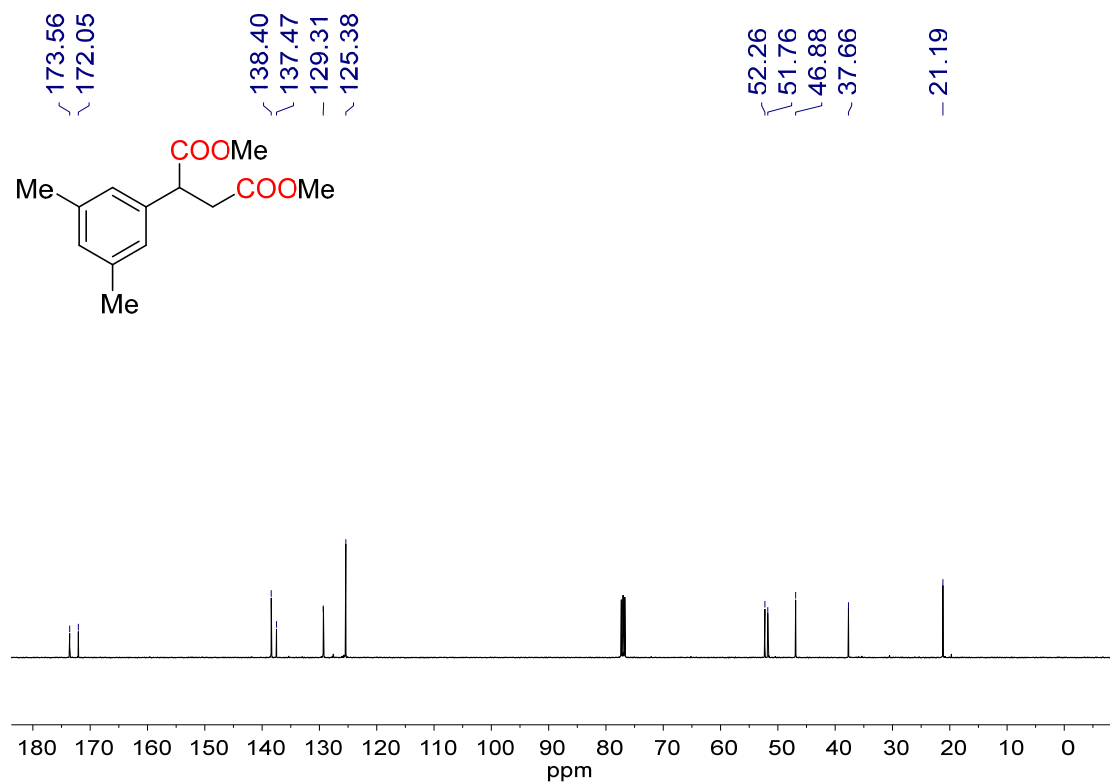

$^{13}\text{C}\{^1\text{H}\}$  NMR spectrum (101 MHz, Chloroform-*d*) of 2ae

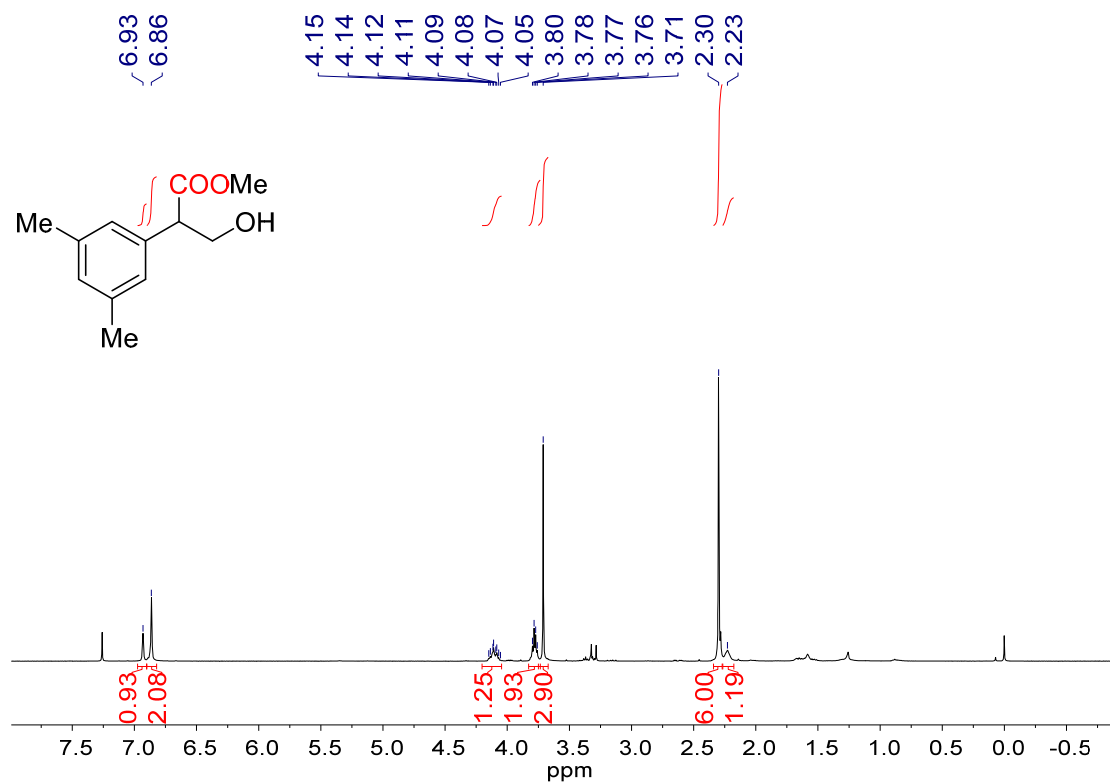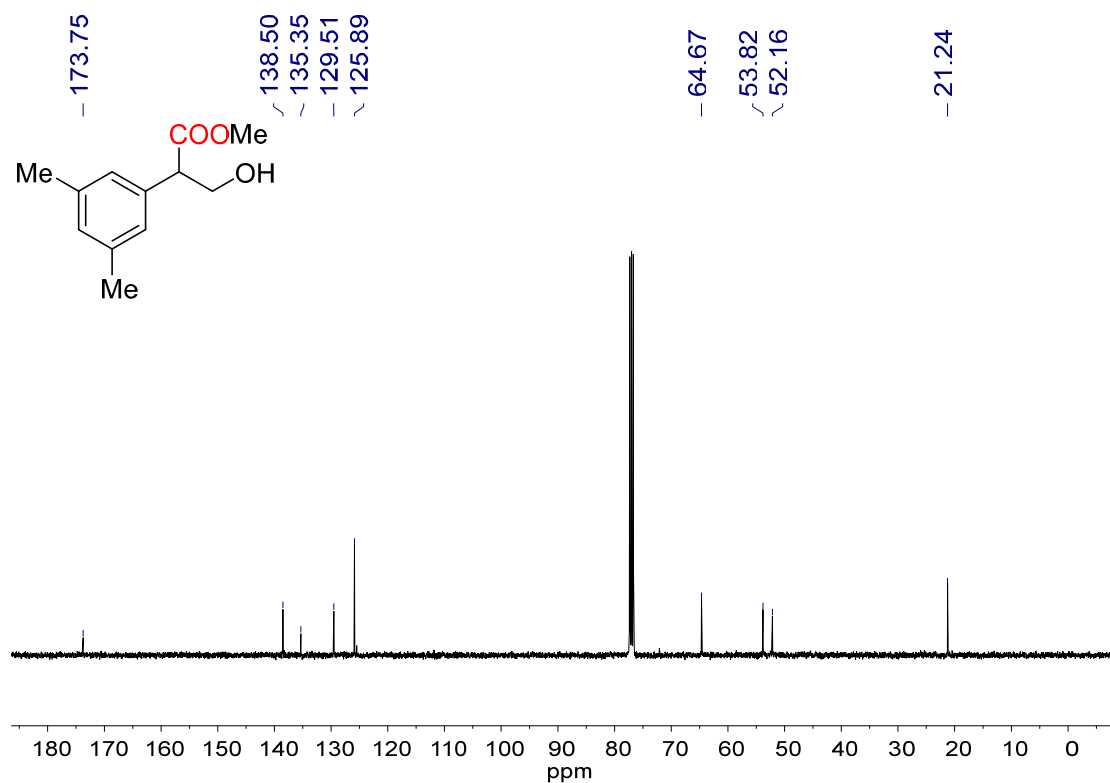

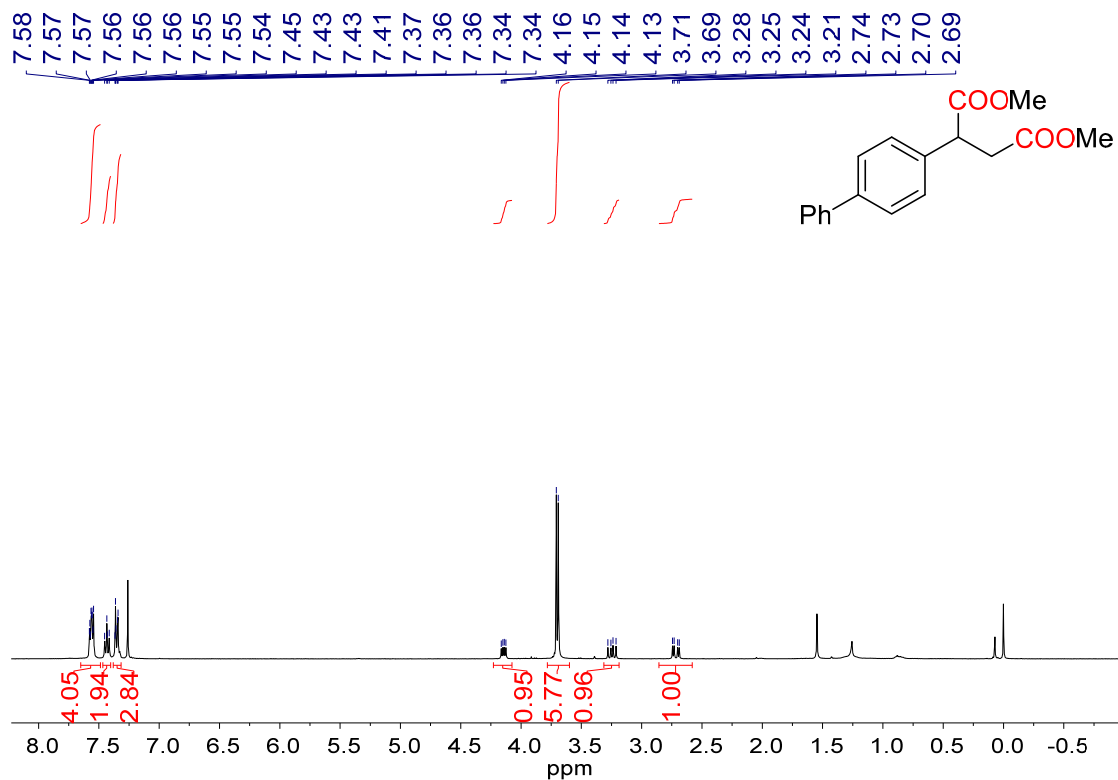

**$^1\text{H}$  NMR spectrum (400 MHz, Chloroform-*d*) of 2af**

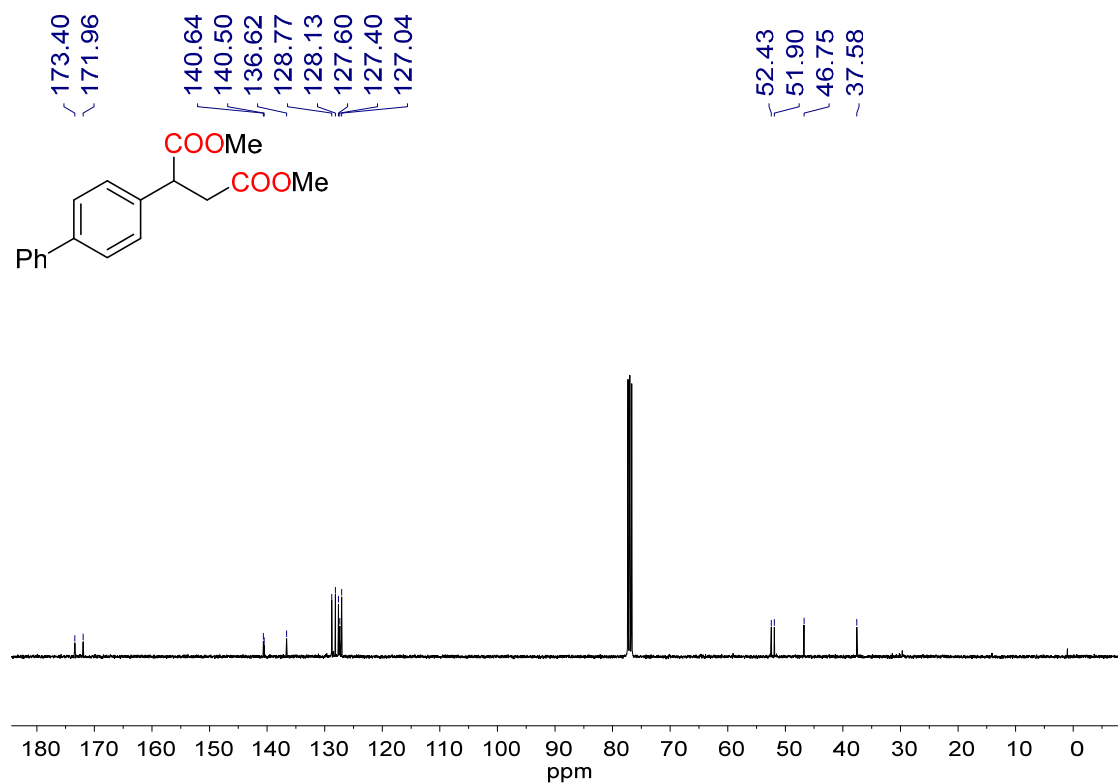

**$^{13}\text{C}\{^1\text{H}\}$  NMR spectrum (101 MHz, Chloroform-*d*) of 2af**

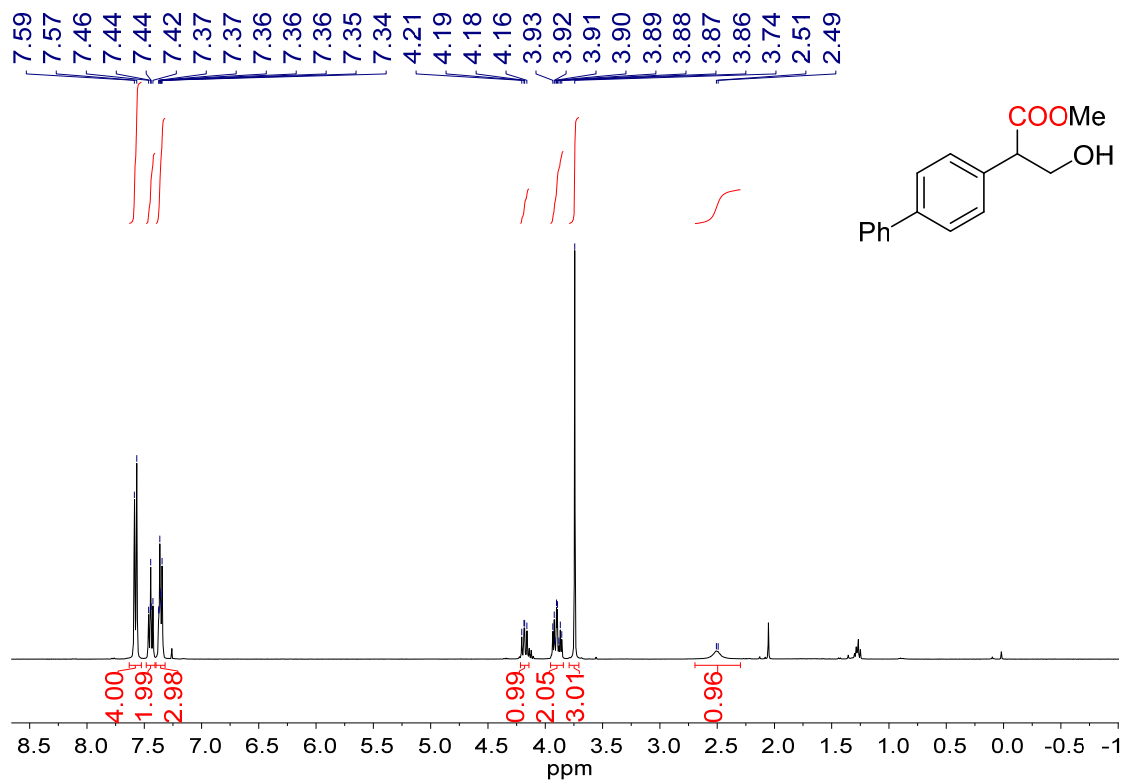

**<sup>1</sup>H NMR spectrum (400 MHz, Chloroform-*d*) of 3af**

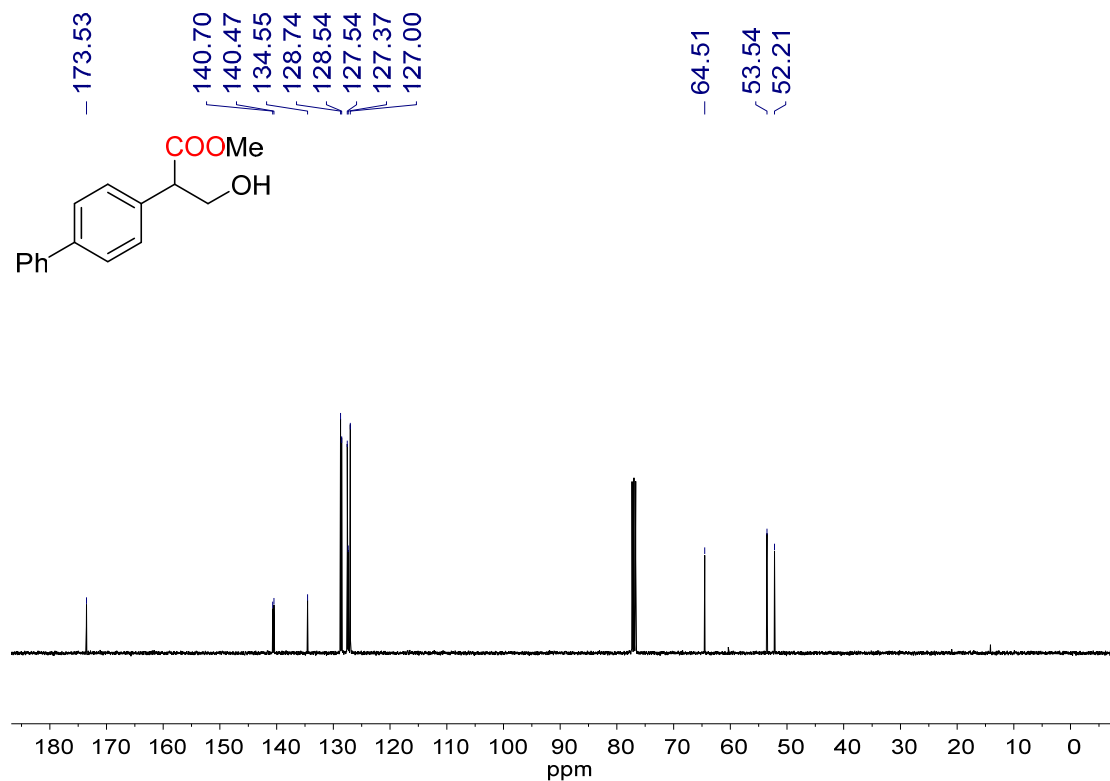

**<sup>13</sup>C{<sup>1</sup>H} NMR spectrum (101 MHz, Chloroform-*d*) of 3af**

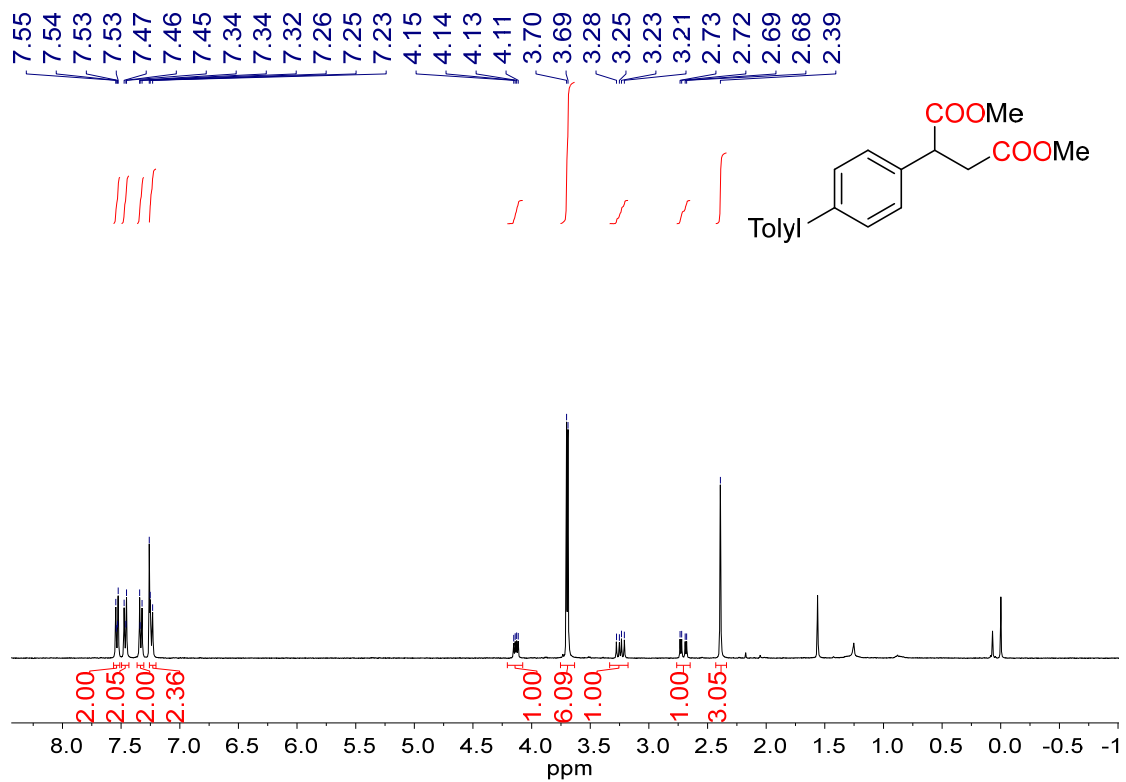

<sup>1</sup>H NMR spectrum (400 MHz, Chloroform-*d*) of 2ag

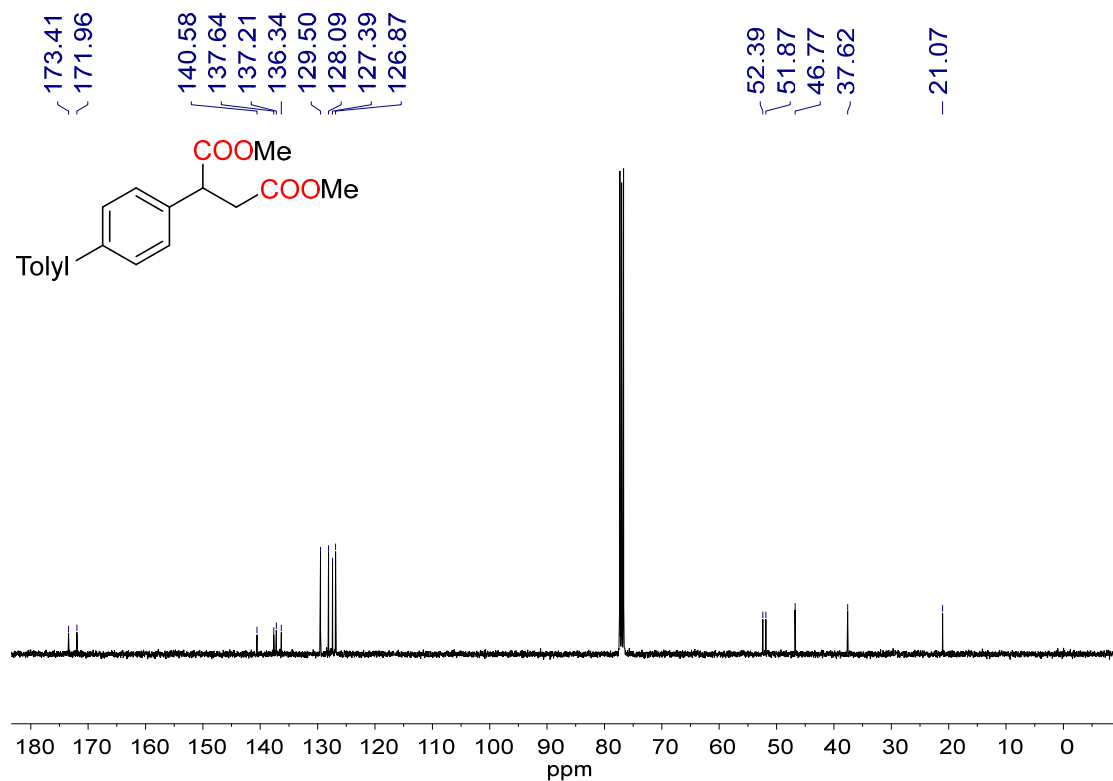

<sup>13</sup>C{<sup>1</sup>H} NMR spectrum (101 MHz, Chloroform-*d*) of 2ag



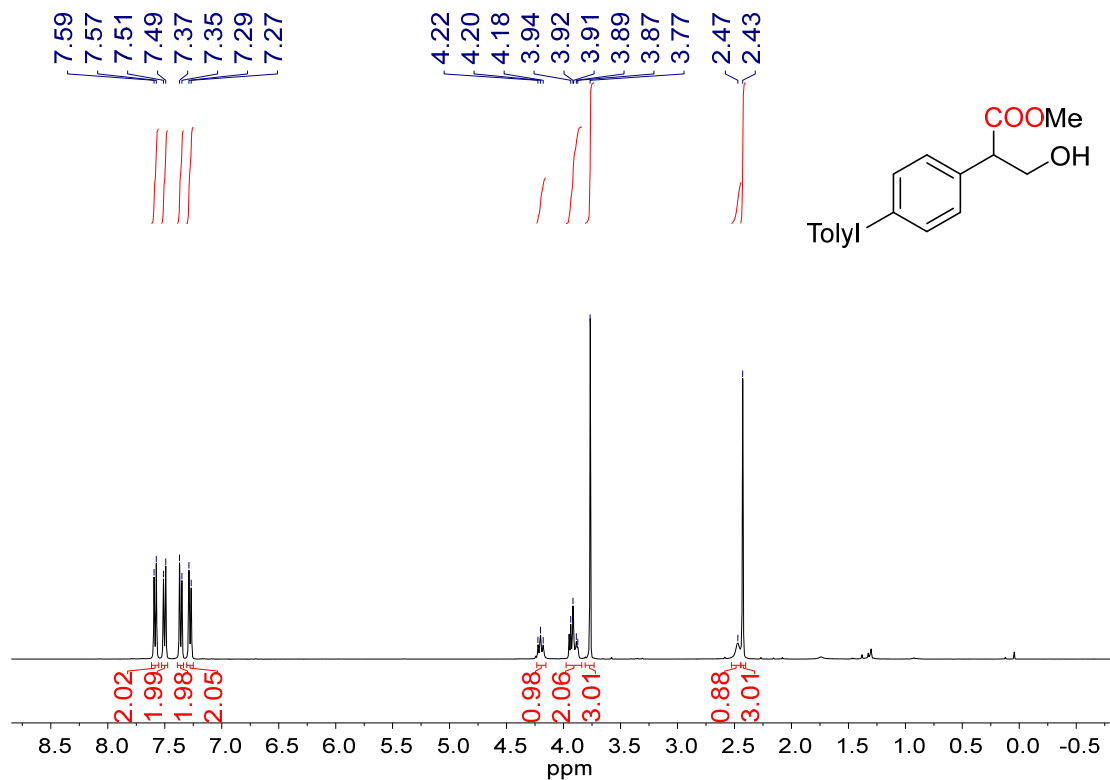

<sup>1</sup>H NMR spectrum (400 MHz, Chloroform-*d*) of 3ag

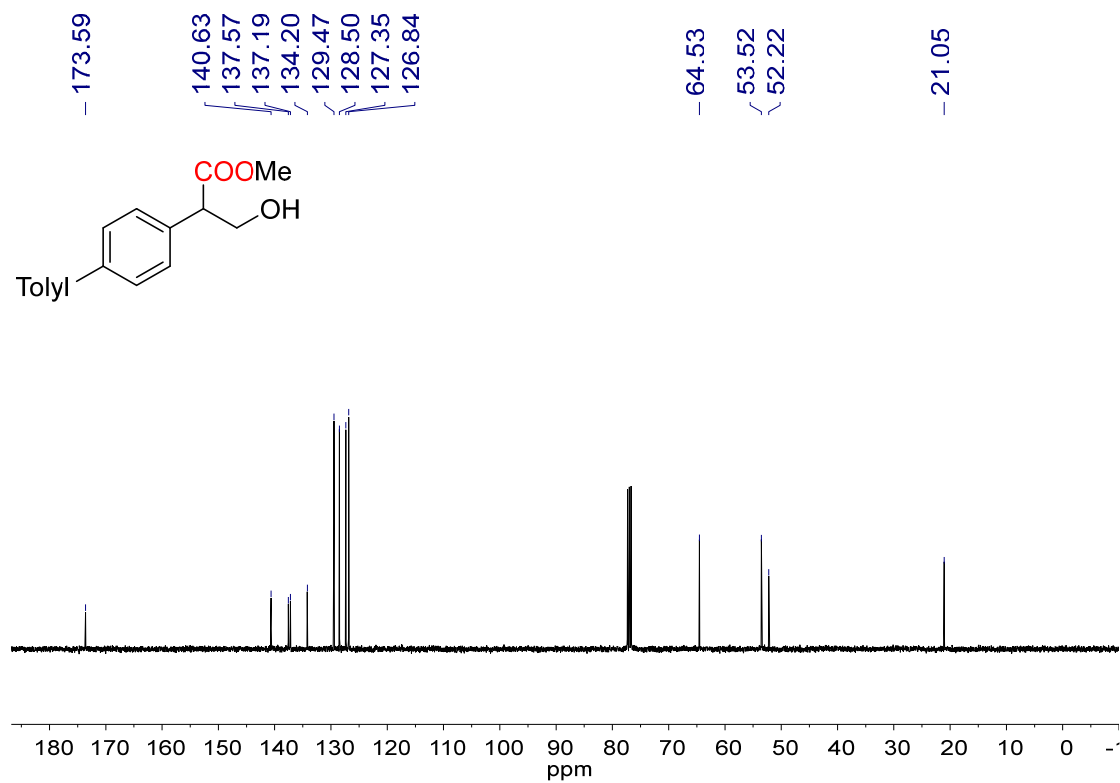

<sup>13</sup>C{<sup>1</sup>H} NMR spectrum (101 MHz, Chloroform-*d*) of 3ag

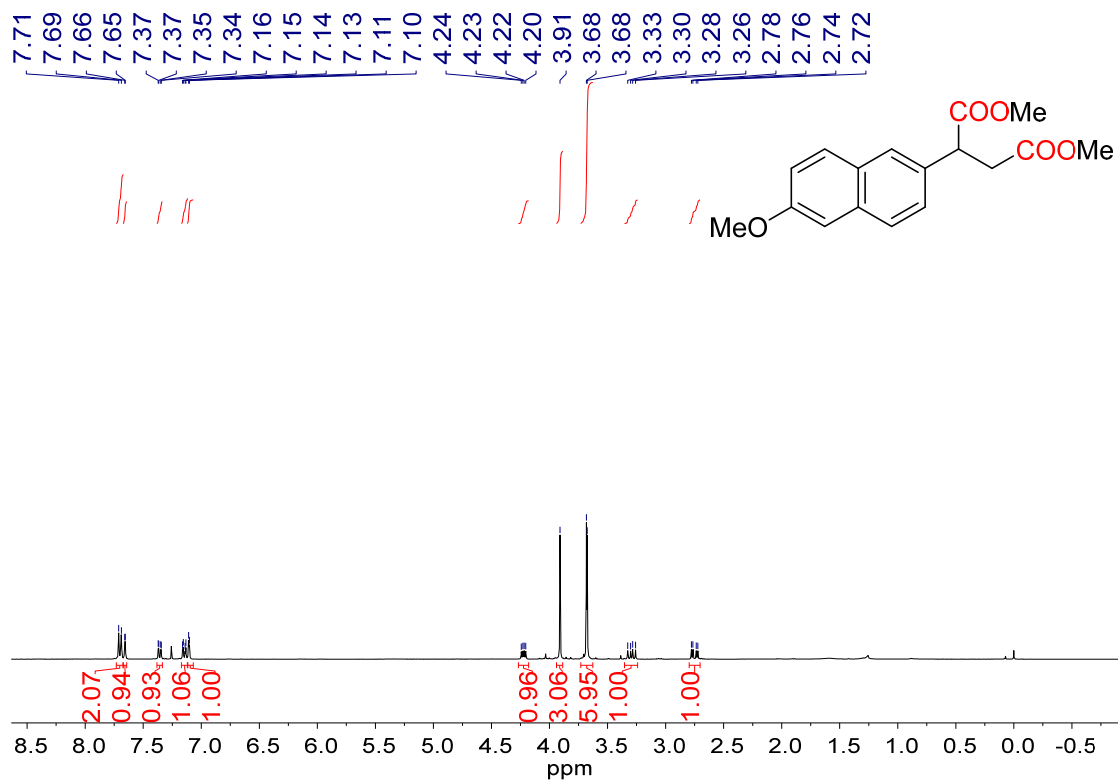

<sup>1</sup>H NMR spectrum (400 MHz, Chloroform-*d*) of 2ah

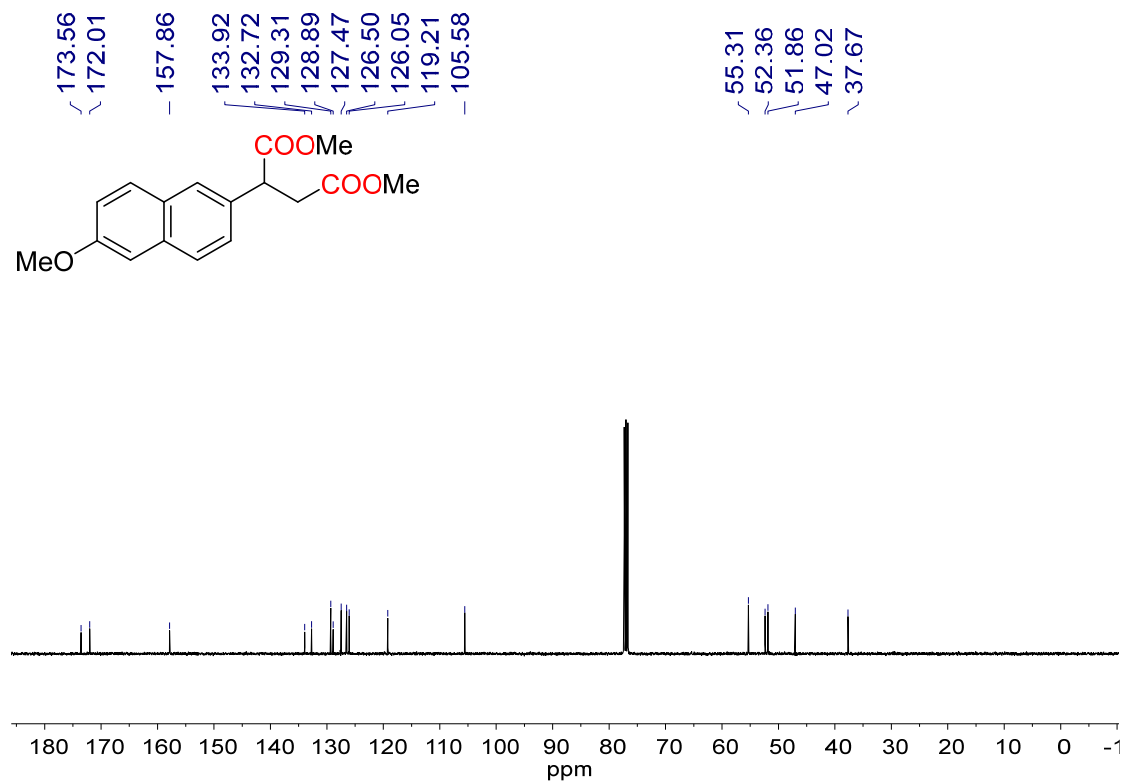

<sup>13</sup>C{<sup>1</sup>H} NMR spectrum (101 MHz, Chloroform-*d*) of 2ah

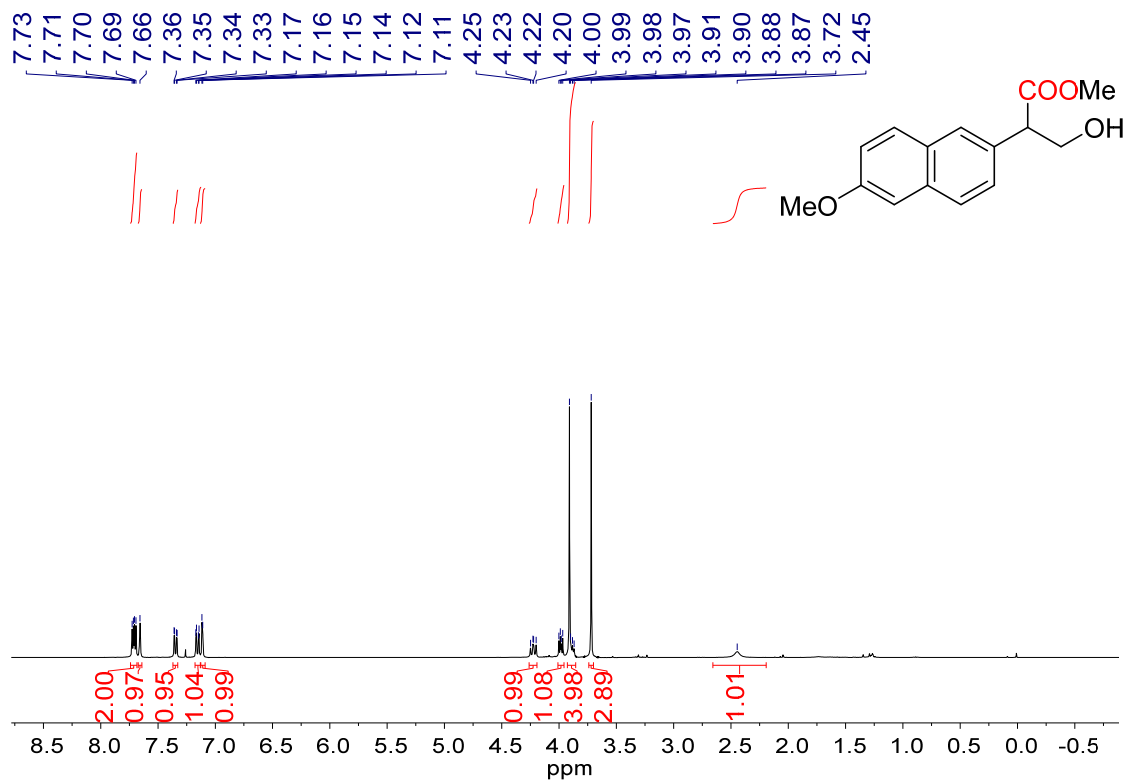

<sup>1</sup>H NMR spectrum (400 MHz, Chloroform-d) of 3ah

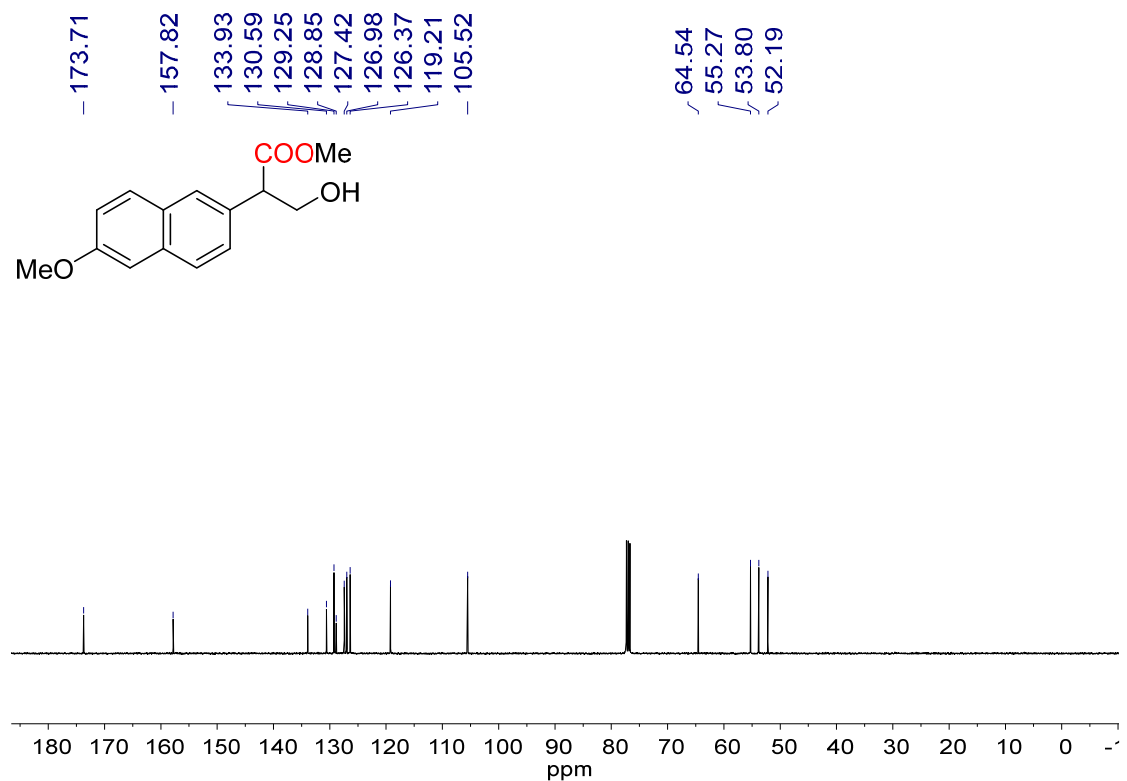

<sup>13</sup>C{<sup>1</sup>H} NMR spectrum (101 MHz, Chloroform-d) of 3ah

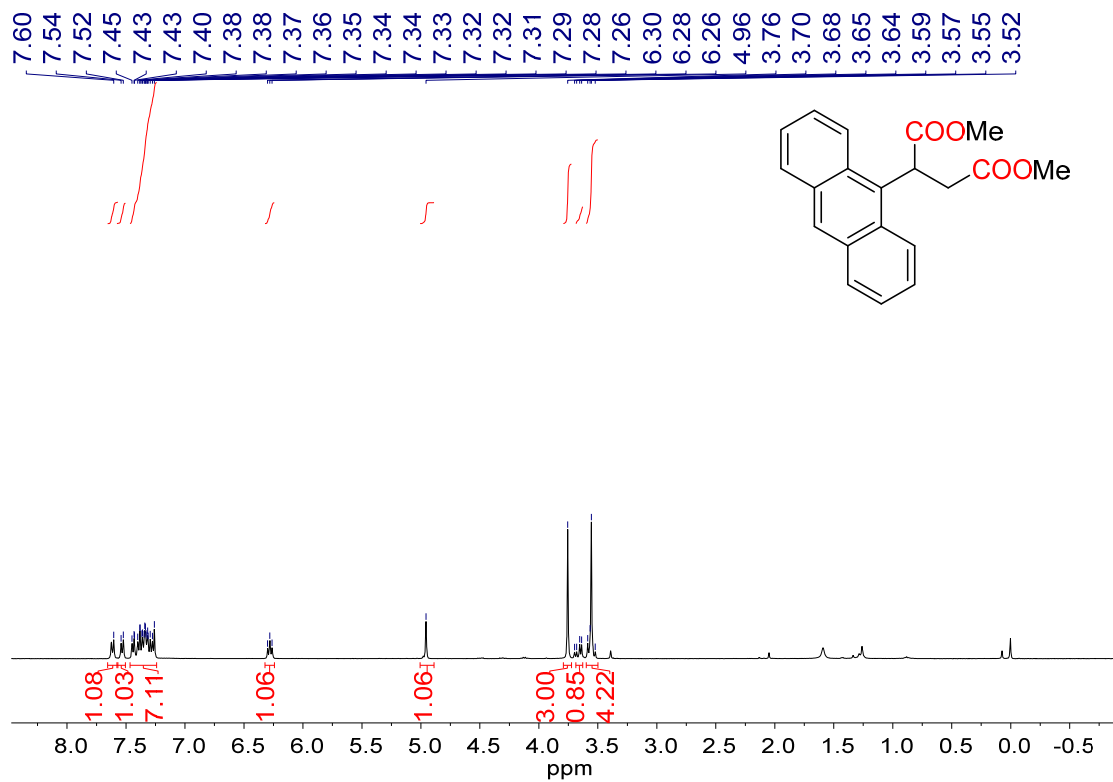

**<sup>1</sup>H NMR spectrum (400 MHz, Chloroform-*d*) of 2ai**

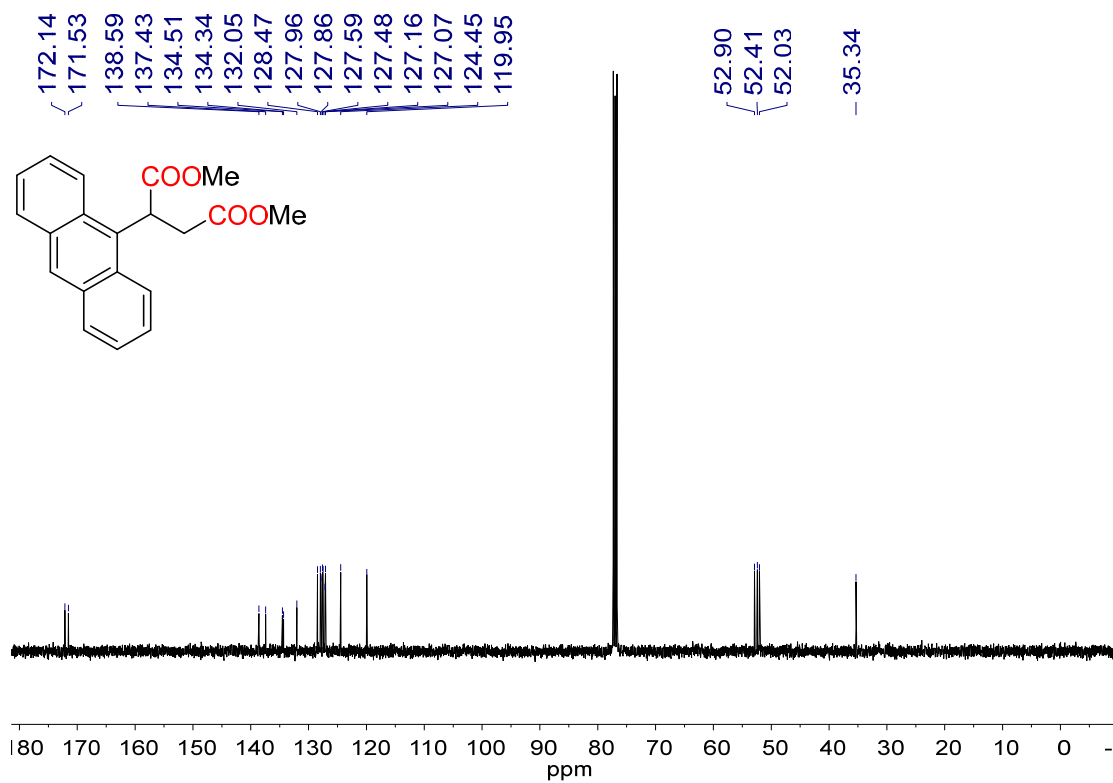

**<sup>13</sup>C{<sup>1</sup>H} NMR spectrum (101 MHz, Chloroform-*d*) of 2ai**

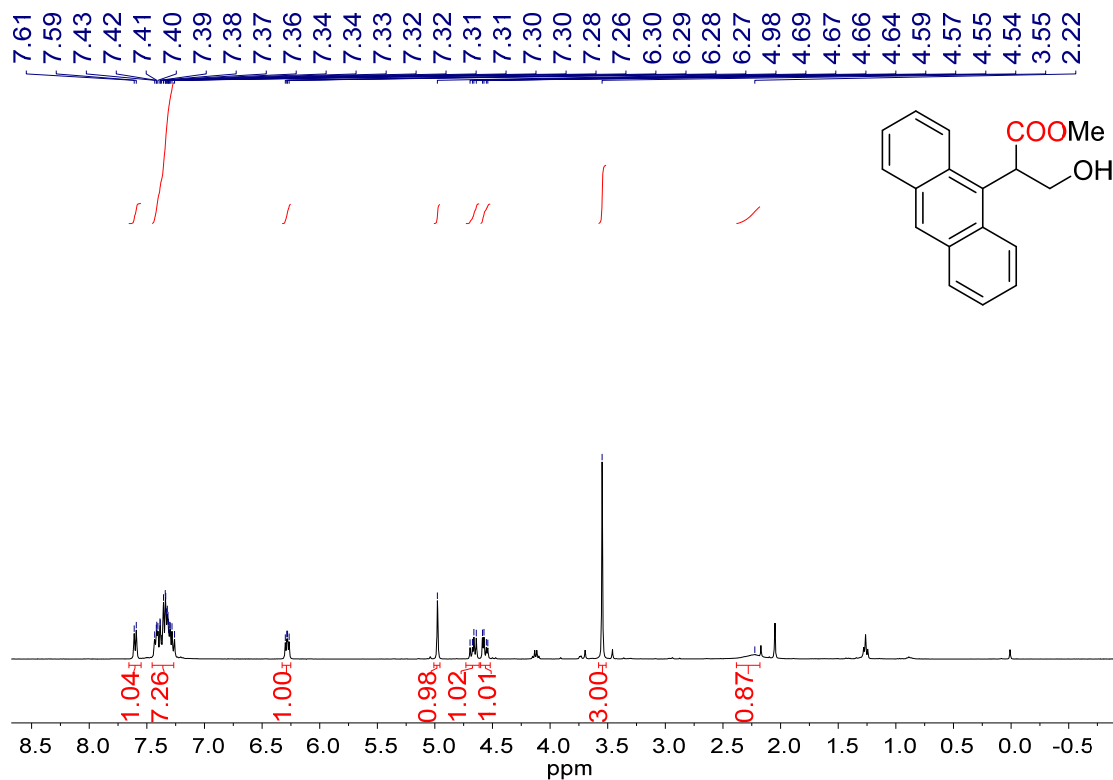

<sup>1</sup>H NMR spectrum (400 MHz, Chloroform-*d*) of 3ai

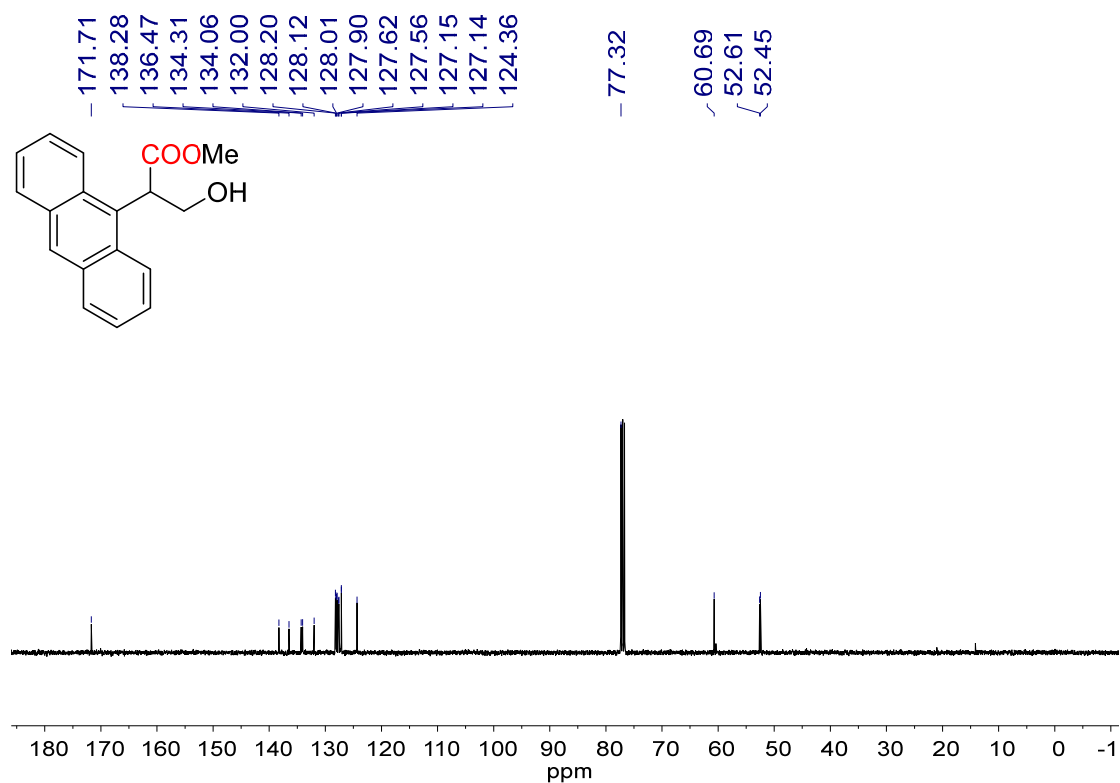

<sup>13</sup>C{<sup>1</sup>H} NMR spectrum (101 MHz, Chloroform-*d*) of 3ai

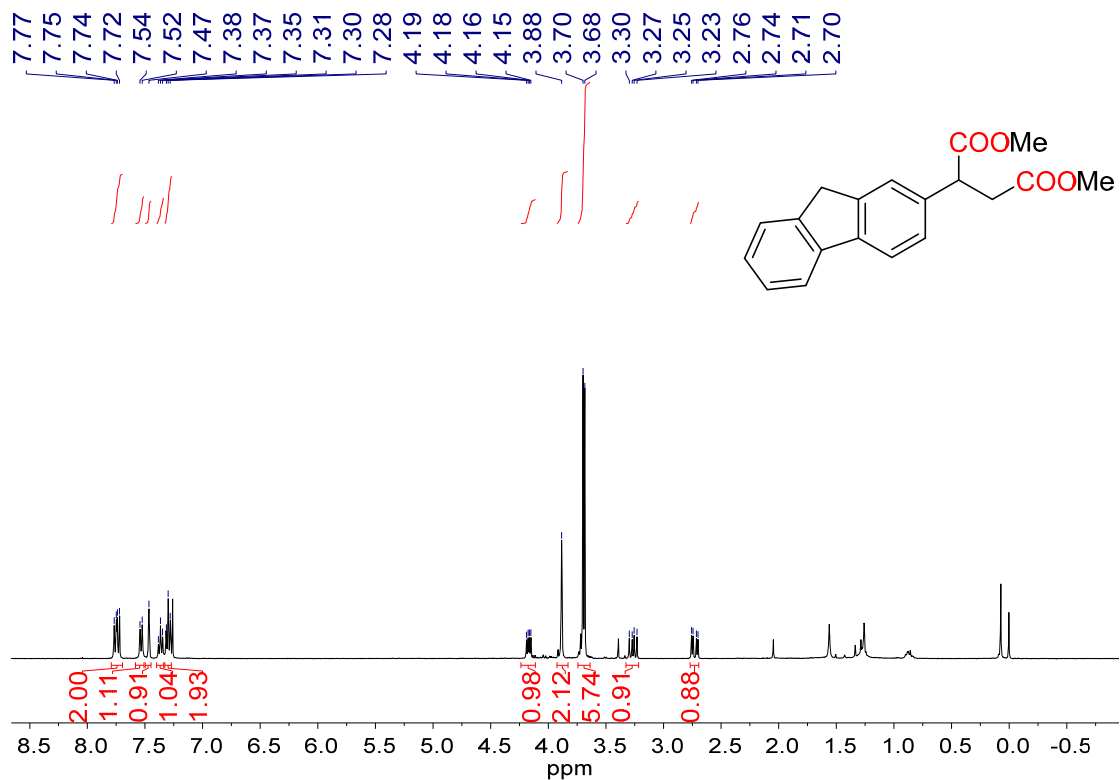

<sup>1</sup>H NMR spectrum (400 MHz, Chloroform-*d*) of 2aj

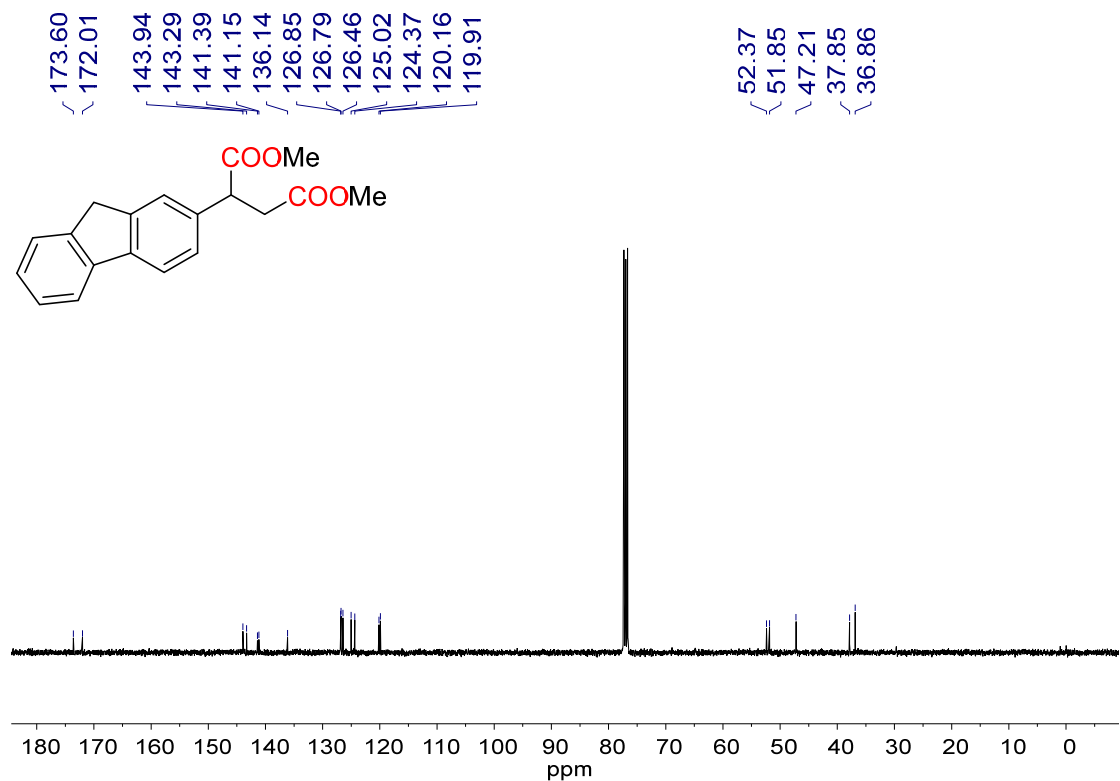

<sup>13</sup>C{<sup>1</sup>H} NMR spectrum (101 MHz, Chloroform-*d*) of 2aj

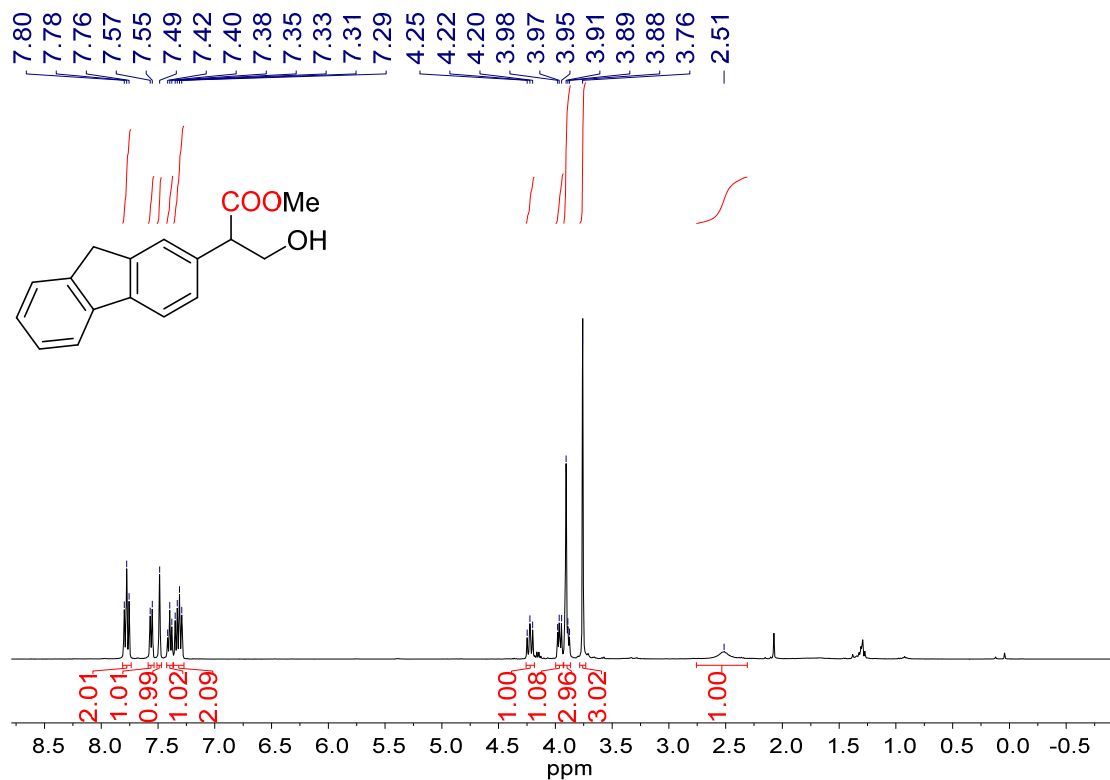

<sup>1</sup>H NMR spectrum (400 MHz, Chloroform-*d*) of 3aj

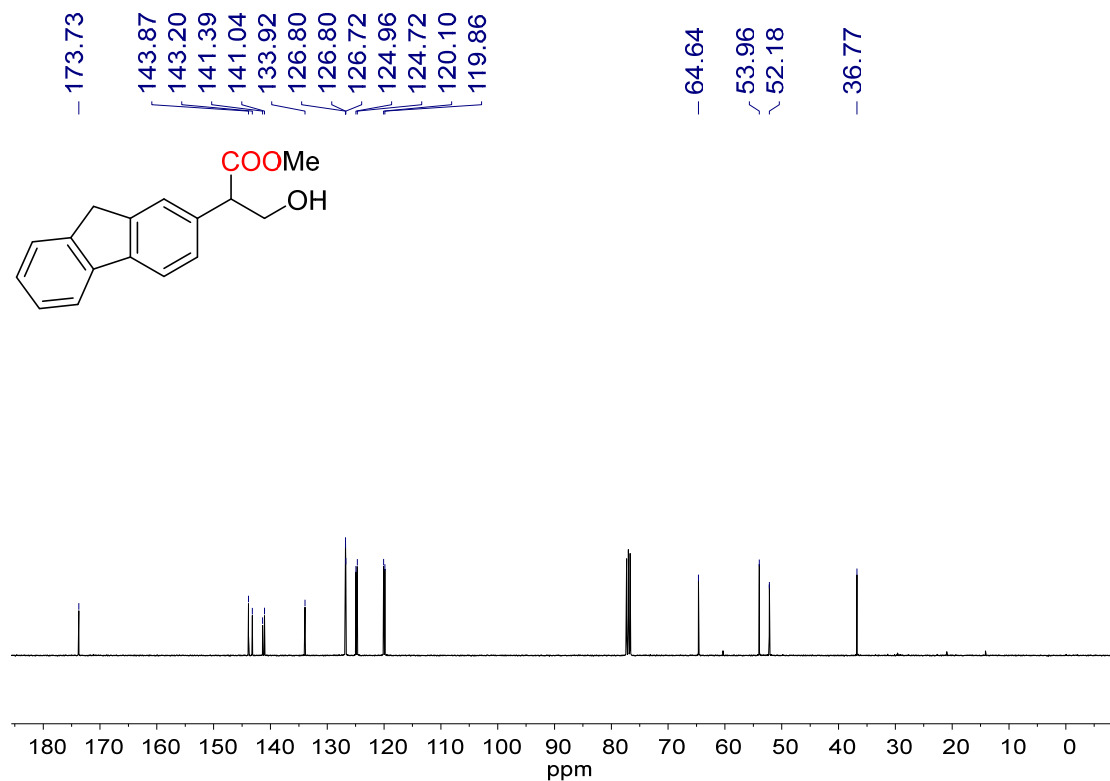

<sup>13</sup>C{<sup>1</sup>H} NMR spectrum (101 MHz, Chloroform-*d*) of 3aj

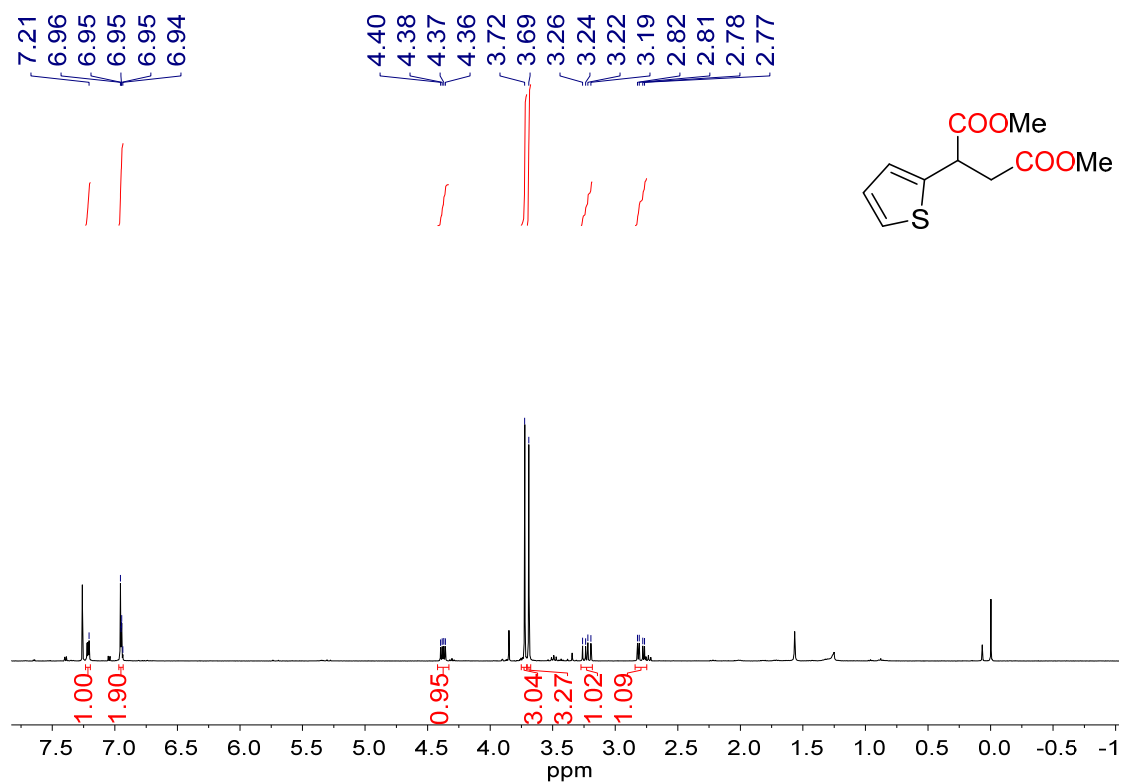

<sup>1</sup>H NMR spectrum (400 MHz, Chloroform-*d*) of 2ak

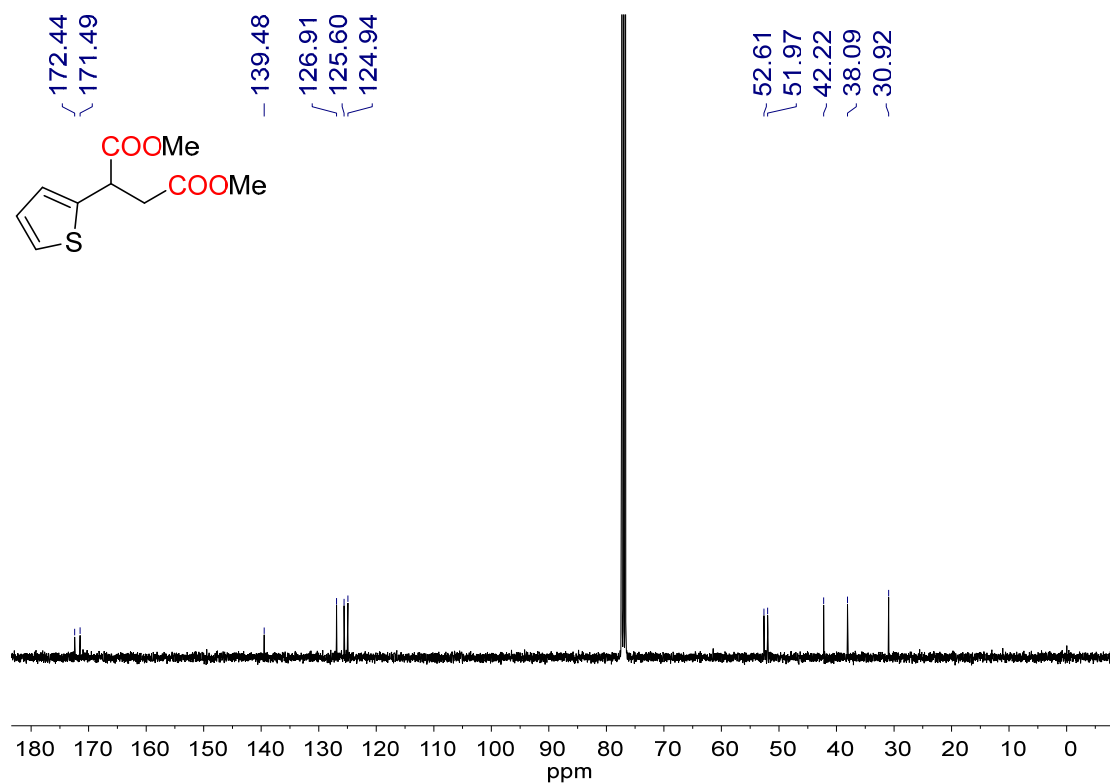

<sup>13</sup>C NMR spectrum (101 MHz, Chloroform-*d*) of 2ak



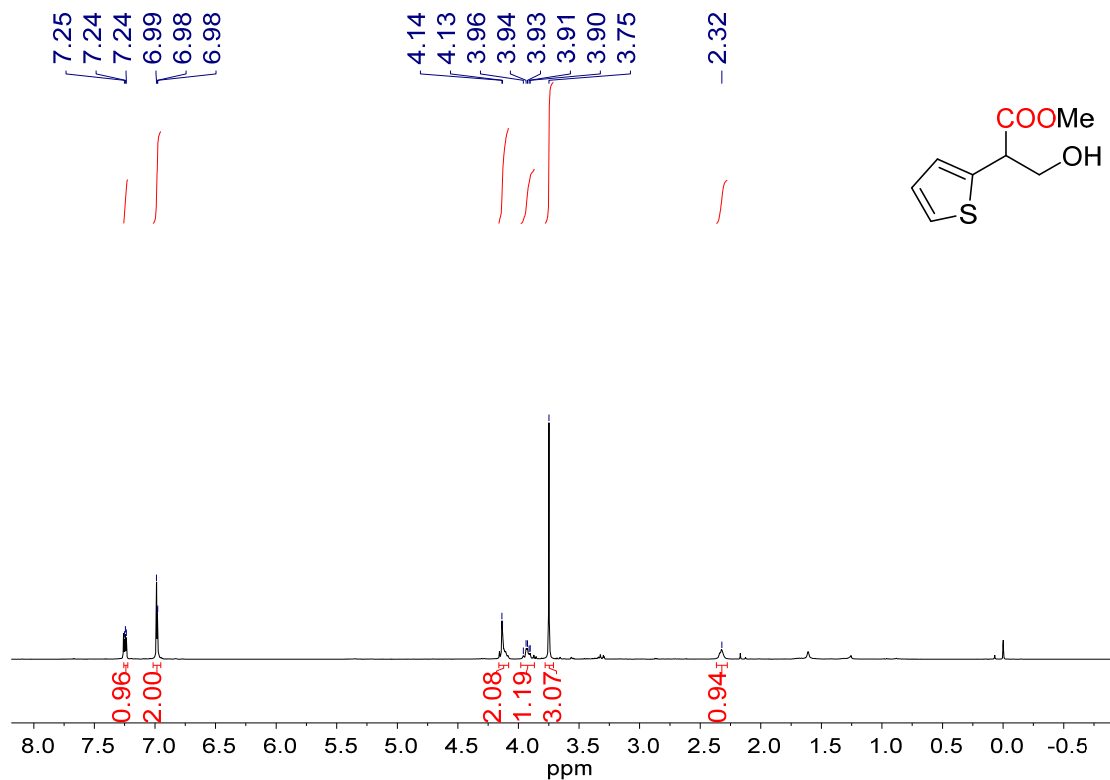

<sup>1</sup>H NMR spectrum (400 MHz, Chloroform-*d*) of 3ak

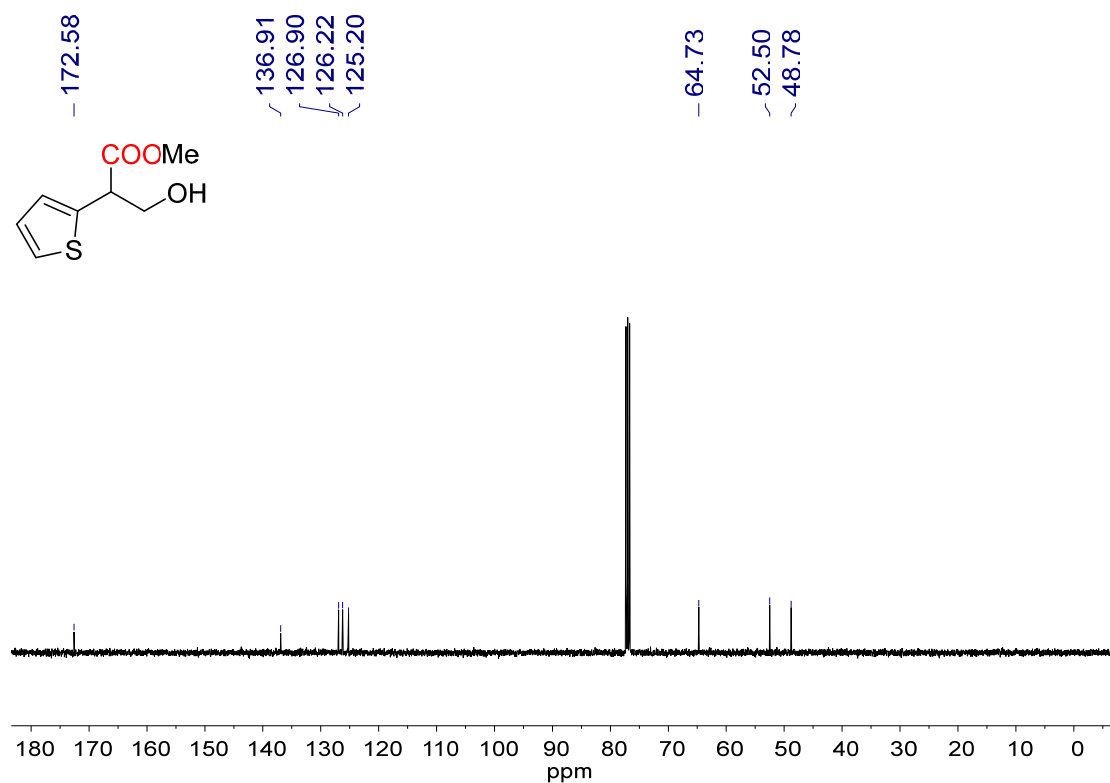

<sup>13</sup>C{<sup>1</sup>H} NMR spectrum (101 MHz, Chloroform-*d*) of 3ak

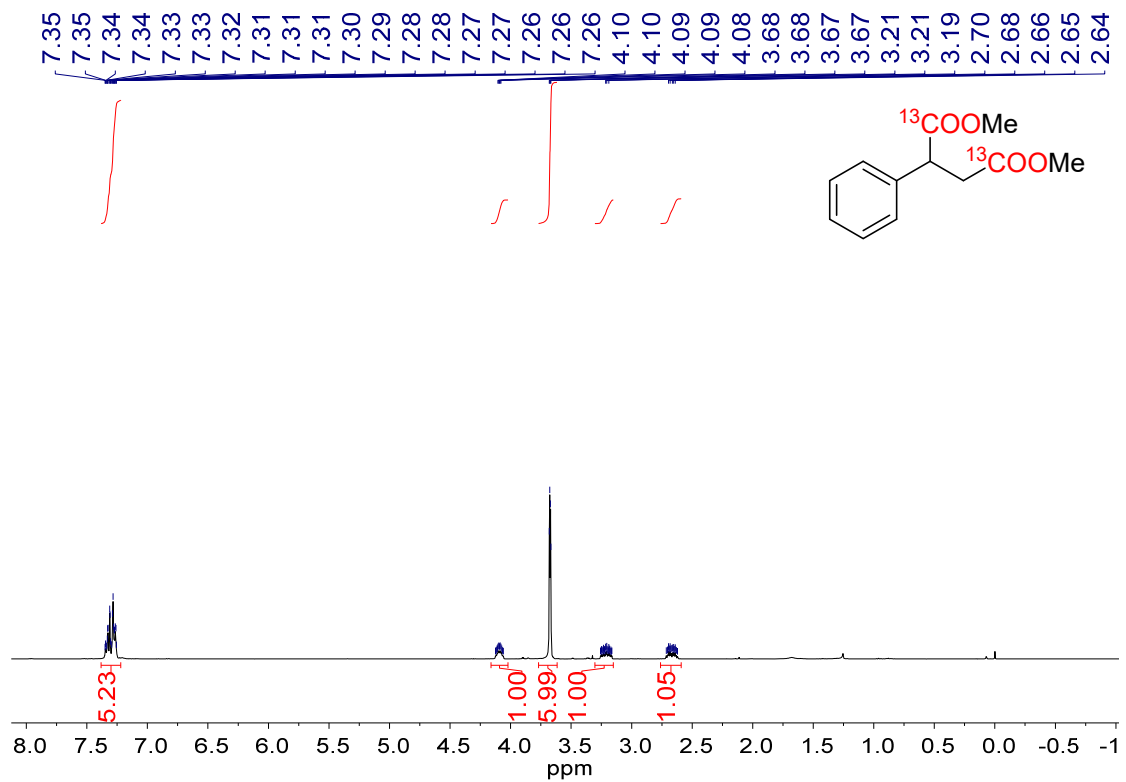

**<sup>1</sup>H NMR spectrum (400 MHz, Chloroform-*d*) of 2a''**

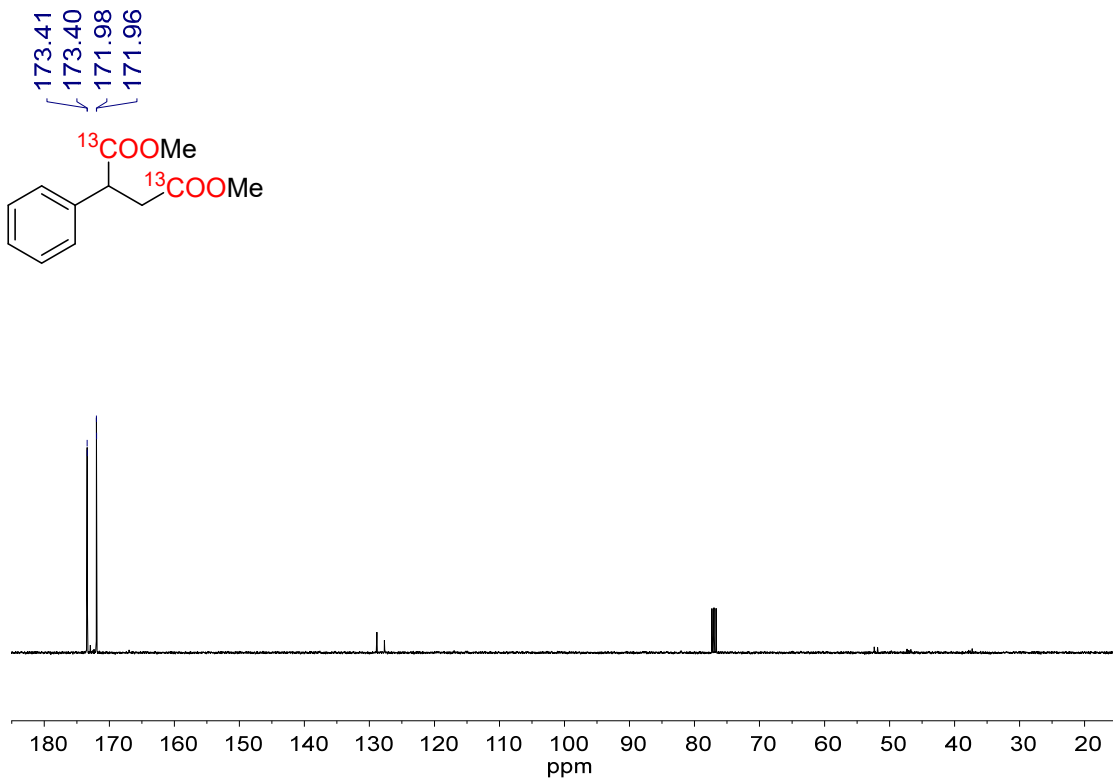

**<sup>13</sup>C{<sup>1</sup>H} NMR spectrum (101 MHz, Chloroform-*d*) of 2a''**

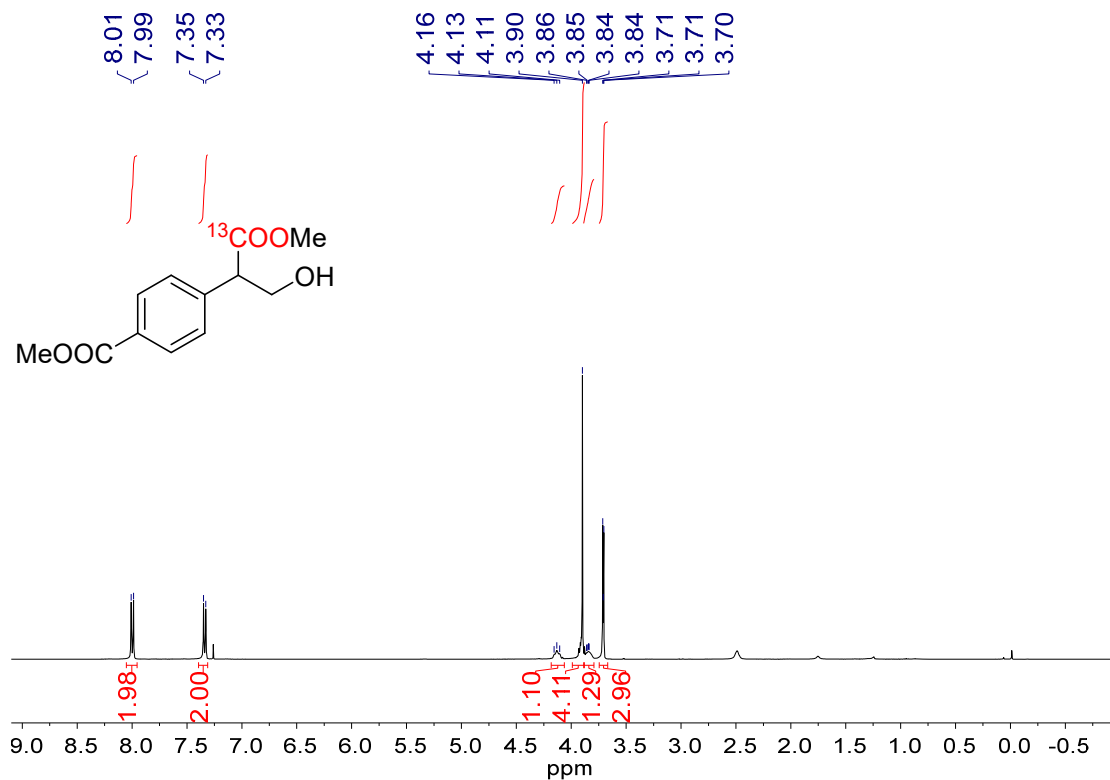

**<sup>1</sup>H NMR spectrum (400 MHz, Chloroform-*d*) of 3q'**

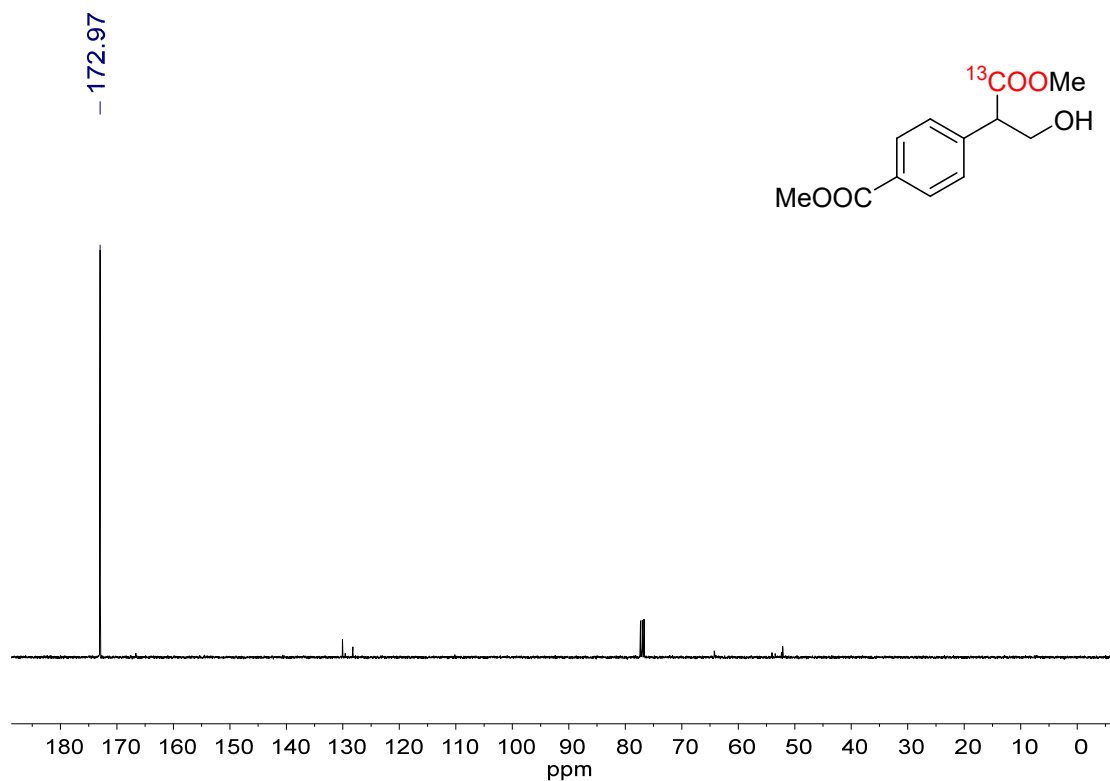

**<sup>13</sup>C{<sup>1</sup>H} NMR spectrum (101 MHz, Chloroform-*d*) of 3q'**

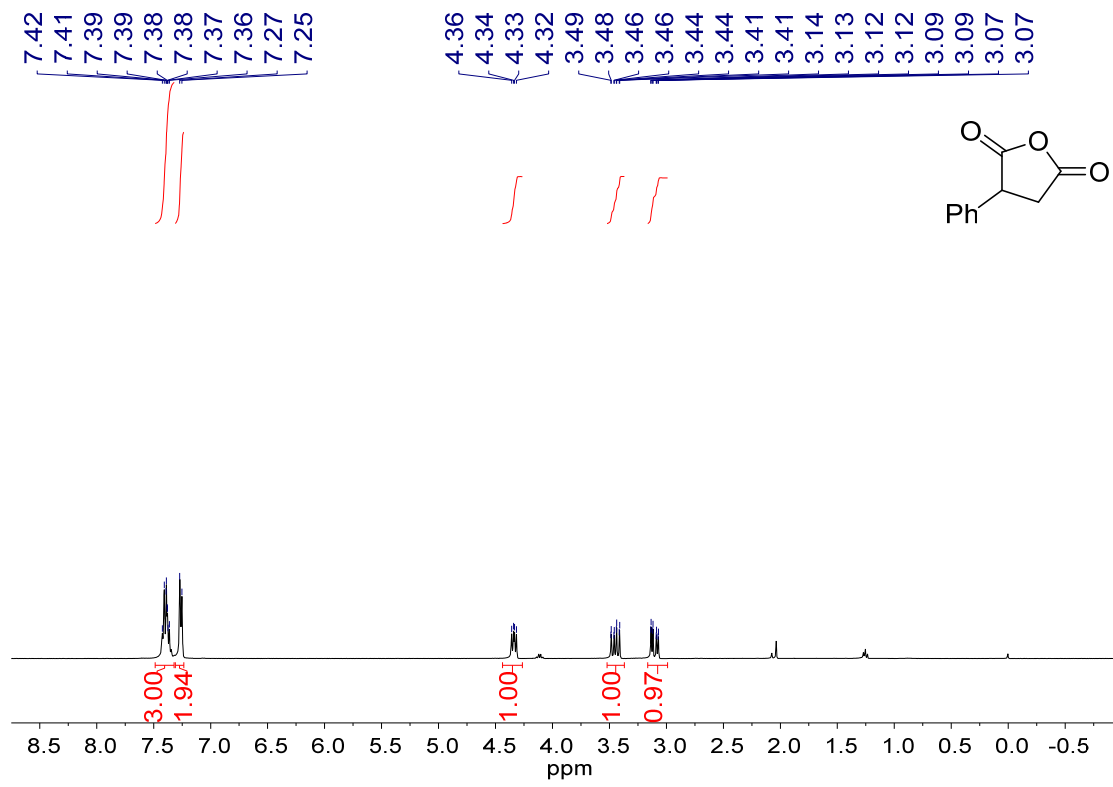

<sup>1</sup>H NMR spectrum (400 MHz, Chloroform-*d*) of 4a

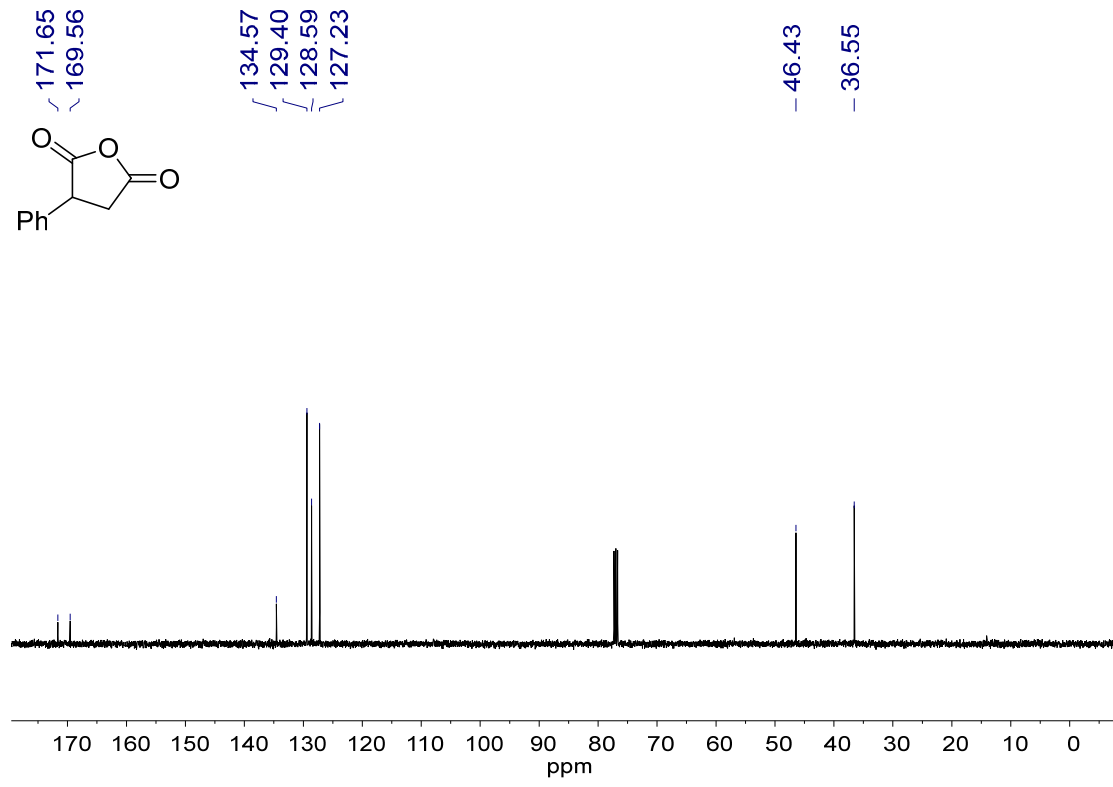

<sup>13</sup>C{<sup>1</sup>H} NMR spectrum (101 MHz, Chloroform-*d*) of 4a

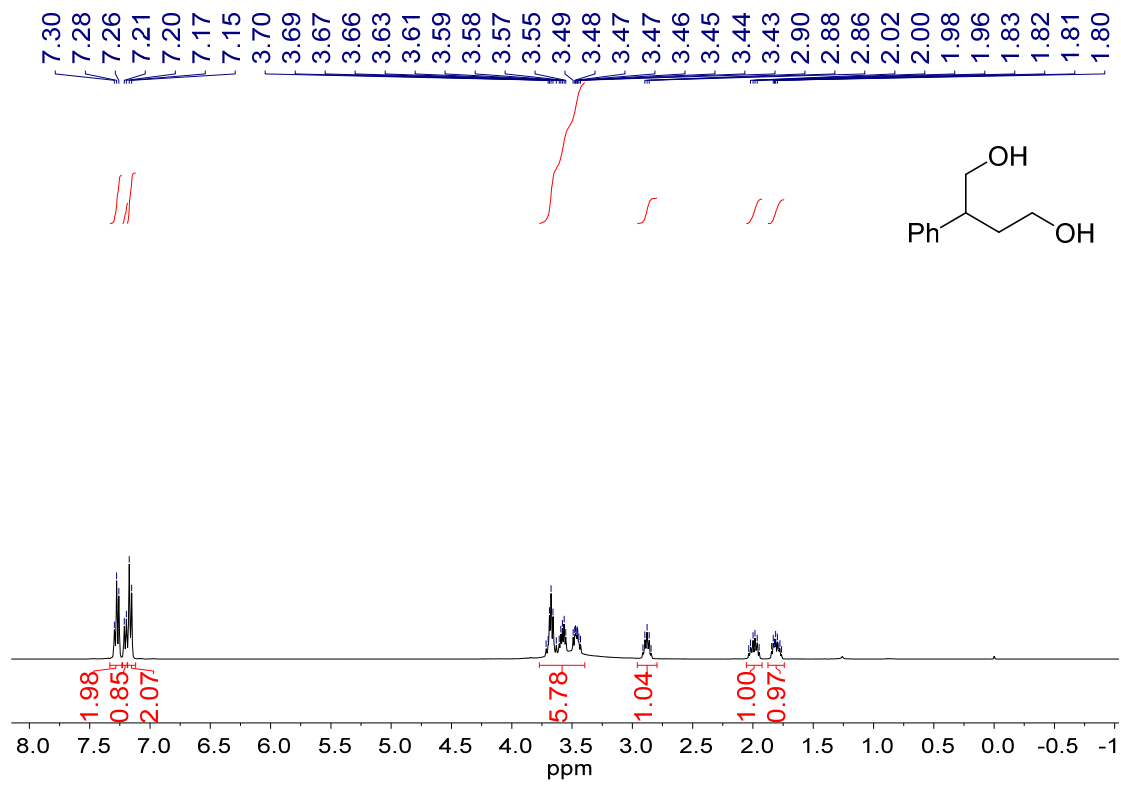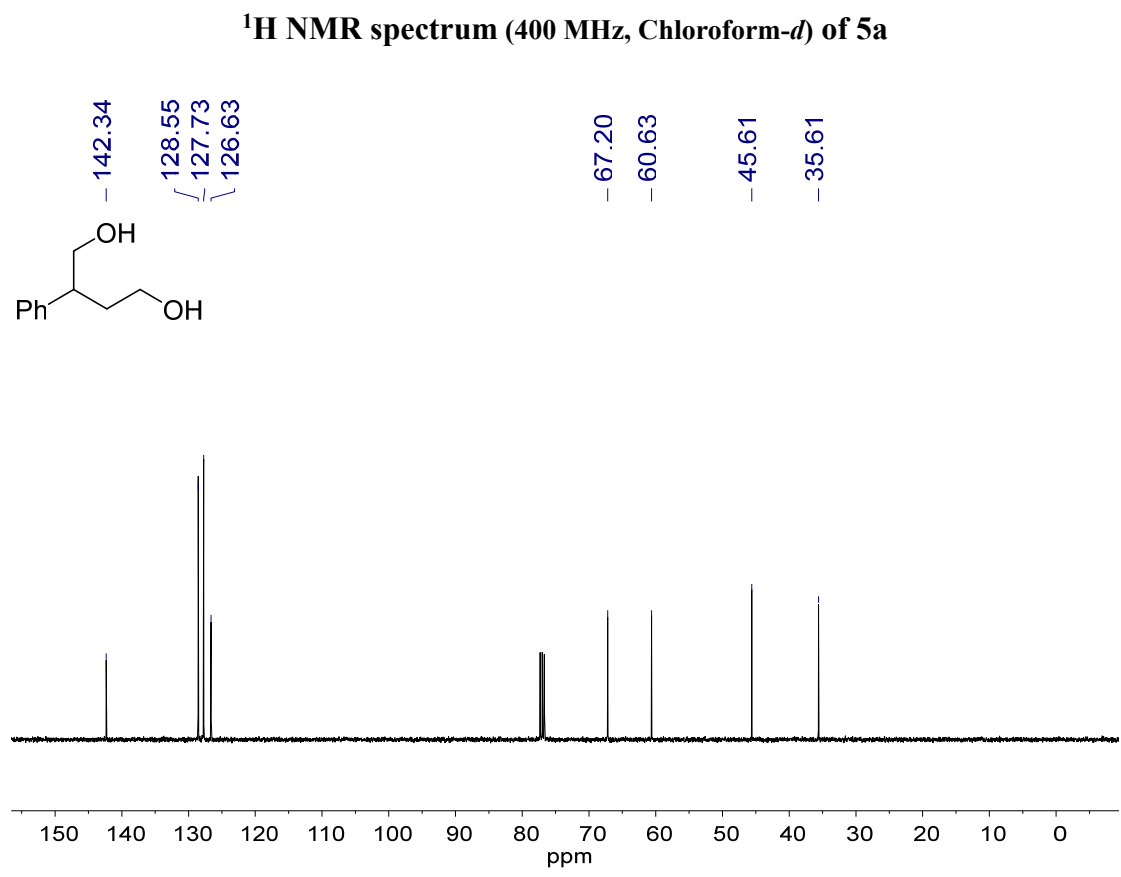

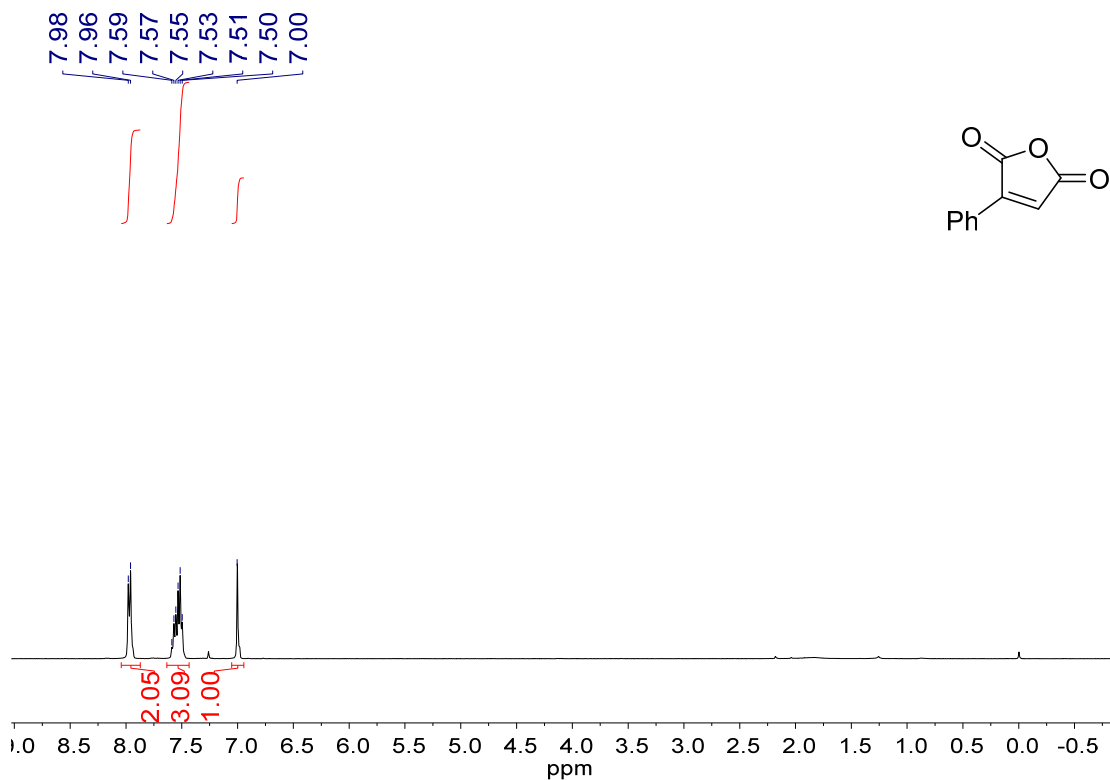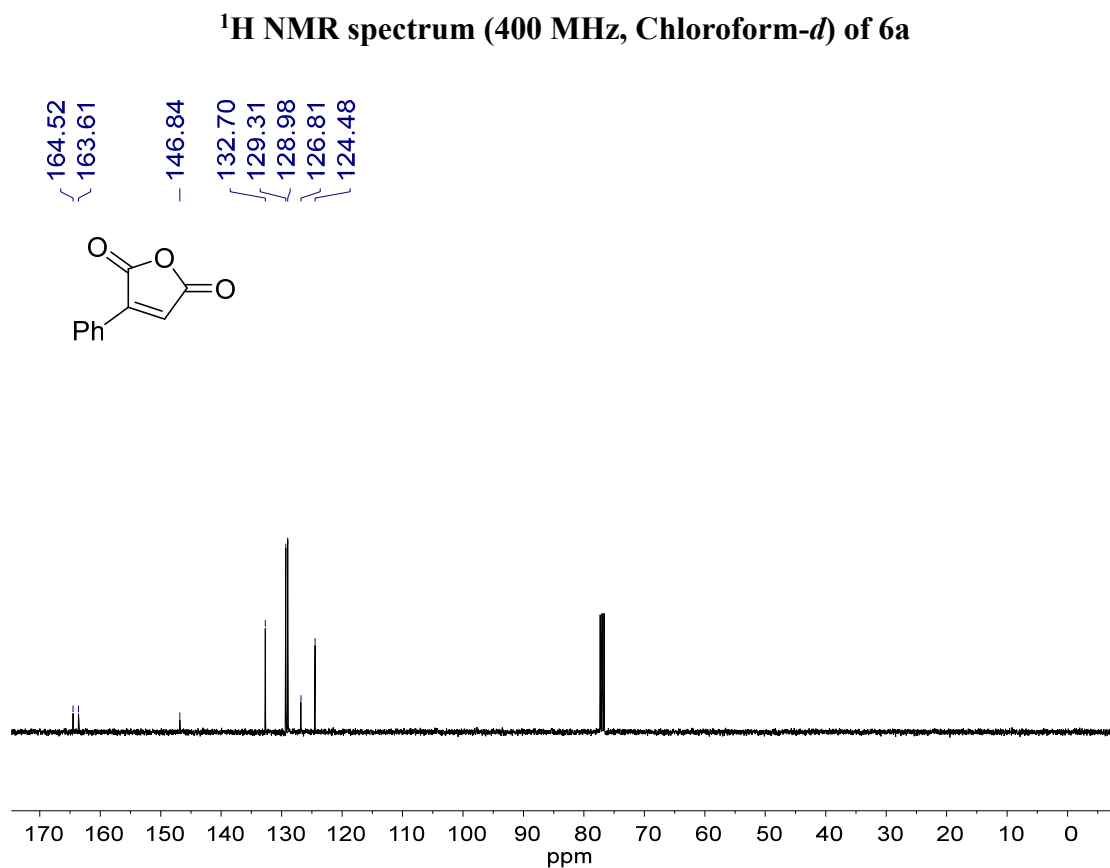

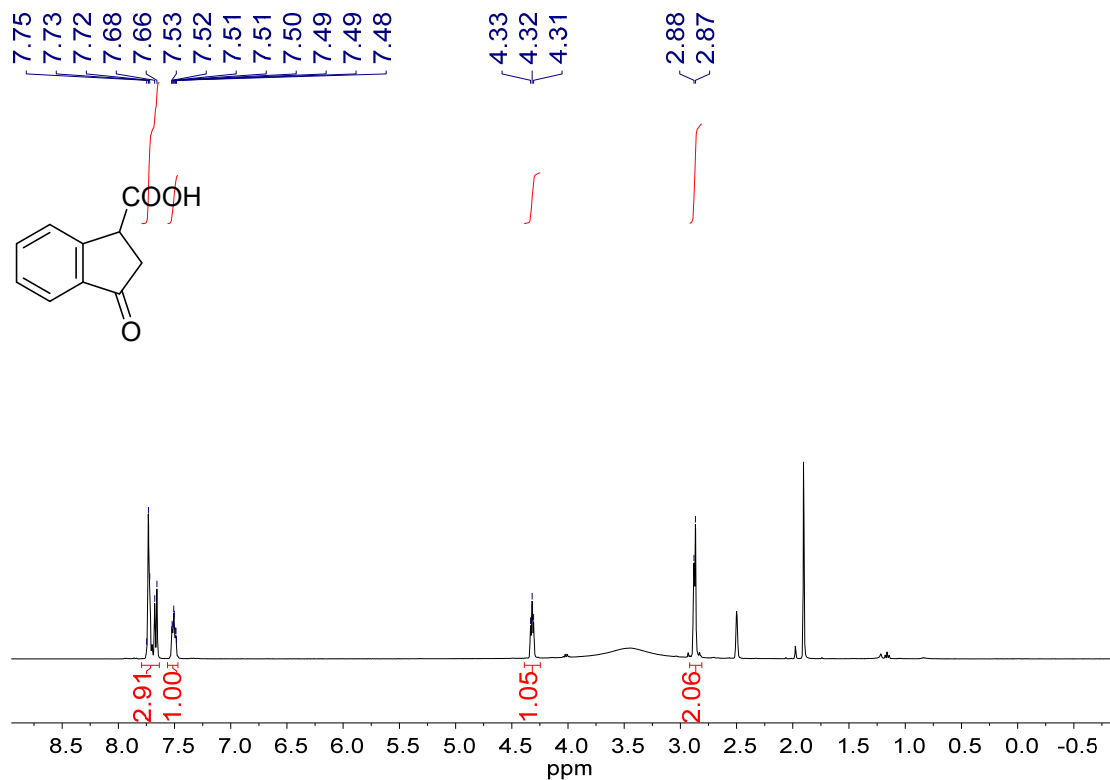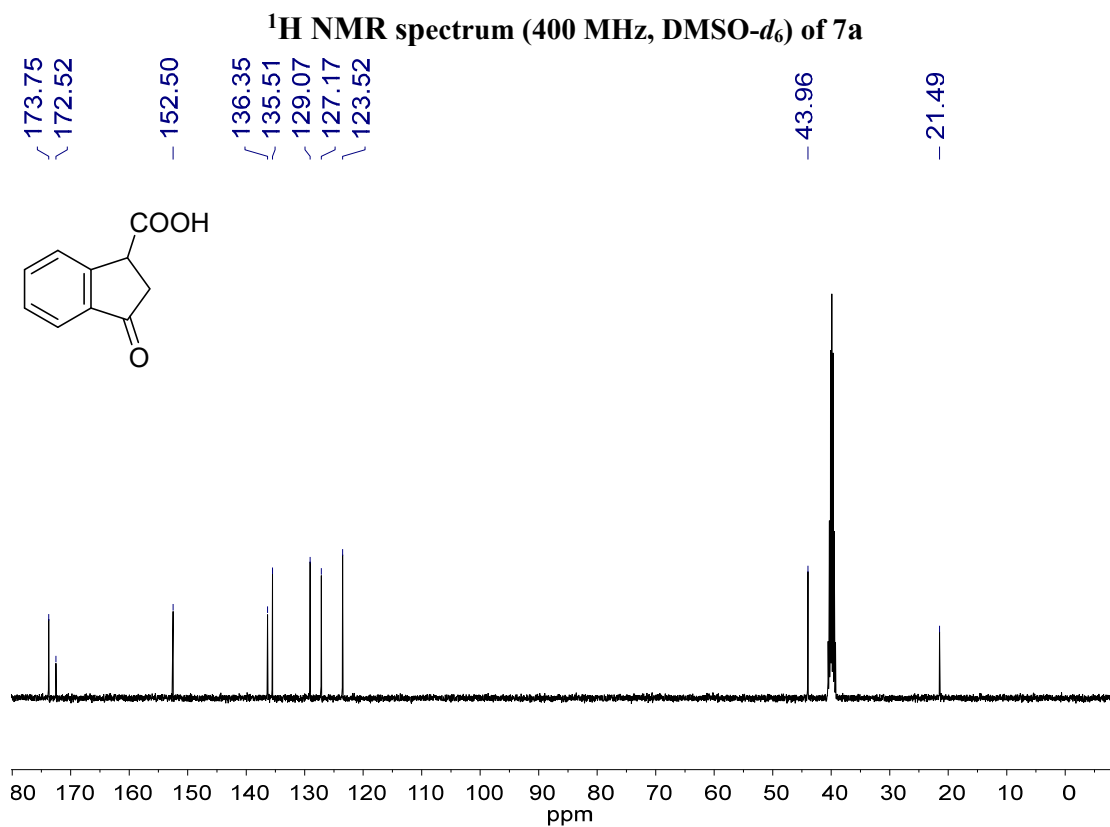

## 11. References

1. L. Emmanuvel, T. M. A. Shaikh and A. Sudalai, *Org. Lett.*, 2005, **7**, 5071–5074.
2. L. Shen, Z.-N. Chen, Q. Zheng, J. Wu, X. Xu and T. Tu, *ACS Catal.*, 2021, **11**, 12833–12839.
3. E. R. Baral, J. H. Lee and J. G. Kim, *J. Org. Chem.*, 2018, **83**, 11768–11776.
4. F. Manoni, C. Cornaggia, J. Murray, S. Tallon and S. J. Connon, *Chem. Commun.*, 2012, **48**, 6502–6504.
5. (a) H. Gotoh, R. Masui, H. Ogino, M. Shoji and Y. Hayashi, *Angew. Chem. Int. Ed.*, 2006, **45**, 6853–6856. (b) J. Zhang, M. Senthilkumar, S. C. Ghosh and S. H. Hong, *Angew. Chem. Int. Ed.*, 2010, **49**, 6391–6395.
6. (a) L. A. Paquette, J. M. Gardlik, K. J. McCullough, R. Samodral, G. DeLucca and R. J. Ouellette, *J. Am. Chem. Soc.*, 1983, **105**, 7649–7655. (b) O. Muraoka, G. Tanabe, E. Yamamoto, M. Ono, T. Minematsu and T. Kimura, *J. Chem. Soc. Perkin Trans. 1*, 1995, **11**, 1437–1443.
7. Z. J. Gan, Y. H. Wang, Y. G. Xu, T. Guo, J. Wang, Q. Song, X. J. Xu, S. Y. Hu, Y. J. Wang, D. C. Wang, D. Z. Sun, D. Zhang, T. Xi, H. D. Li, H. B. Zhang, T. J. Hang, H. G. Lu and J. G. Liu, *Org. Biomol. Chem.*, 2015, **13**, 5656–5673.
8. X. Jia, C. Huang, X. Zhang and Z. Lian, *Org. Chem. Front.*, 2021, **8**, 5310–5315.
9. D. Crich and Y. Zou, *J. Org. Chem.*, 2005, **70**, 3309–3311
10. T. Ju, Y.-Q. Zhou, K.-G. Cao, Q. Fu, J.-H. Ye, G.-Q. Sun, X.-F. Liu, L. Chen, L.-L. Liao and D.-G. Yu, *Nat. Catal.*, 2021, **4**, 304–311.
